# Supplementary material for: A prevalent huge phage clade in human and animal gut microbiomes
Source: bioRxiv preprint, doi:10.1101/2025.08.10.669567, version 1 (2025-08-11)
Supplement: Supplementary Table [file 669567_file04.xlsx]

## Sheet: ST1
Supplementary Table 1 | The information of publications and databases of collected potential huge phage genomes.
Publication	Journal	Title	published db name	file name	Num of candidate huge phage sequences	Num of confirmed huge phage sequences	Percentage	Focusing on phages?
Labbe et al. 2020	Msphere	Extreme Viral Partitioning in a Marine-Derived High Arctic Lake	PIGEONv2.0	Labbe.et.al.2020	0	0	0	no
Coutinho et al. 2020	Microbiome	New viral biogeochemical roles revealed through metagenomic analysis of Lake Baikal	PIGEONv2.0	na	0	0	0	no
Li et al. 2021	ISME Journal	Deep sea sediments associated with cold seeps are a subsurface reservoir of viral diversity	PIGEONv2.0	Li.et.al.2021	0	0	0	no
Roux et al. 2019	PeerJ	Optimizing de novo genome assembly from PCR-amplified metagenomes	PIGEONv2.0	Roux.et.al.2019	0	0	0	no
Durham et al. 2022	ISME Communications	Substantial differences in soil viral community composition within and among four Northern California habitats	PIGEONv2.0	Durham.et.al.2022	0	0	0	no
Emerson et al. 2018	Nature Microbiology	Host-linked soil viral ecology along a permafrost thaw gradient	PIGEONv2.0	Emerson.et.al.2018	0	0	0	no
Sorensen et al. 2021	mSystems	DNase Treatment Improves Viral Enrichment in Agricultural Soil Viromes	PIGEONv2.0	Sorensen.et.al.2021	0	0	0	no
Trubl et al. 2018	mSystems	Soil Viruses Are Underexplored Players in Ecosystem Carbon Processing	PIGEONv2.0	Trubl.et.al.2018	0	0	0	no
Trubl et al. 2019	PeerJ	Towards optimized viral metagenomes for double-stranded and single-stranded DNA viruses from challenging soils	PIGEONv2.0	Trubl.et.al.2019	0	0	0	no
Xu et al. 2018	Nature Communications	The structure and function of the global citrus rhizosphere microbiome	PIGEONv2.0	Xu.et.al.2018	0	0	0	no
Roux et al. 2015	elife	Viral dark matter and virus–host interactions resolved from publicly available microbial genomes	PIGEONv2.0	Roux.et.al.2015	0	0	0	no
Aguirre de Cárcer et al. 2015	Science	Biodiversity and distribution of polar freshwater DNA viruses	na	na	0	0	0	no
Yutin et al. 2021	Nature Communications	Analysis of metagenome-assembled viral genomes from the human gut reveals diverse putative CrAss-like phages with unique genomic features	na	na	0	0	0	no
Zhao et al. 2021	Microbial Ecology	Novel Viral Communities Potentially Assisting in Carbon, Nitrogen, and Sulfur Metabolism in the Upper Slope Sediments of Mariana Trench	na	Zhao.et.al.2021	1	1	1	no
Demina et al. 2024	bioRxiv	Tunturi virus isolates and metagenome-assembled viral genomes provide insights into the virome of Acidobacteriota in Arctic tundra soils	na	Demina.et.al.2024	1	1	1	no
Martins et al. 2018	Microbiome	Viral and metabolic controls on high rates of microbial sulfur and carbon cycling in wetland ecosystems	PIGEONv2.0	Martins.et.al.2018	1	1	1	no
Michniewski et al. 2021	ISME Communications	A new family of “megaphages” abundant in the marine environment	na	Michniewski.et.al.2021	1	1	1	yes
Sun et al. 2024	Environmental Microbiology	Virus ecology and 7-year temporal dynamics across a permafrost thaw gradient	na	Sun.et.al.2024	2	2	1	no
Lee et al. 2022	Soil Biology and Biochemistry	Soil pH influences the structure of virus communities at local and global scales	PIGEONv2.0	Lee.et.al.2022	2	2	1	no
Santos-Medellin et al. 2021	ISME Journal	Viromes outperform total metagenomes in revealing the spatiotemporal patterns of agricultural soil viral communities	PIGEONv2.0	Santos-Medellin.et.al.2021	2	2	1	no
Edgar et al. 2022	Nature	Petabase-scale sequence alignment catalyses viral discovery	na	Edgar.et.al.2022	2	2	1	no
Zhao et al. 2022	Microbial Ecology	Significant Differences in Planktonic Virus Communities Between “Cellular Fraction” (0.22 ~ 3.0 µm) and “Viral Fraction” (< 0.22 μm) in the Ocean	na	Zhao.et.al.2022	2	1	0.5	no
Hu et al. 2023	iScience	Characterization of a novel genus of jumbo phages and their application in wastewater treatment	na	Hu.et.al.2023	2	2	1	yes
Santos-Medellín et al. 2022	PNAS	Spatial turnover of soil viral populations and genotypes overlain by cohesive responses to moisture in grasslands	PIGEONv2.0	Santos-Medellín.et.al.2022	3	3	1	no
Zhong et al. 2024	Nature Geoscience	Glacier-preserved Tibetan Plateau viral community probably linked to warm–cold climate variations	na	Zhong.et.al.2024	3	1	0.333333	no
Benler et al. 2021	Microbiome	Thousands of previously unknown phages discovered in whole-community human gut metagenomes	na	Benler.et.al.2021	4	4	1	no
Shah et al. 2023	Nature Microbiology	Expanding known viral diversity in the healthy infant gut	na	Shah.et.al.2023	4	4	1	no
Trubl et al. 2021	Microbiome	Active virus-host interactions at sub-freezing temperatures in Arctic peat soil	PIGEONv2.0	Trubl.et.al.2021	4	1	0.25	no
Kallies et al. 2023	viruses	Identification of Huge Phages from Wastewater Metagenomes	na	Kallies.et.al.2023	7	7	1	yes
Crisci et al. 2021	iScience	Closely related Lak megaphages replicate in the microbiomes of diverse animals	na	Crisci.et.al.2021	8	8	1	no
Chen et al. 2020	Nature Microbiology	Large freshwater phages with the potential to augment aerobic methane oxidation	na	Chen.et.al.2020	10	10	1	yes
Sugimoto et al. 2021	PLoS Computational Biology	Comprehensive discovery of CRISPR-targeted terminally redundant sequences in the human gut metagenome: viruses, plasmids, and more	na	Sugimoto.et.al.2021	11	10	0.909091	no
Langwig et al. 2024	bioRxiv	Endemism shapes viral ecology and evolution in globally distributed hydrothermal vent ecosystems	na	Langwig.et.al.2024	11	9	0.818182	no
Yahara et al. 2021	Nature Communications	Long-read metagenomics using PromethION uncovers oral bacteriophages and their interaction with host bacteria	na	Yahara.et.al.2021	11	4	0.363636	yes
Devoto et al. 2019	Nature Microbiology	Megaphages infect Prevotella and variants are widespread in gut microbiomes	na	Devoto.et.al.2019	15	15	1	no
Chen et al. 2022	ISME Communications	Phage-encoded ribosomal protein S21 expression is linked to late stage phage replication	na	Chen.et.al.2022	15	15	1	yes
Lou et al. 2024	Cell Host & Microbe	Infant gut DNA bacteriophage strain persistence during the first 3 years of life	na	Lou.et.al.2024	15	13	0.866667	yes
Vik et al. 2020	Environmental microbiology	Genome-resolved viral ecology in a marine oxygen minimum zone	PIGEONv2.0	Vik.et.al.2020	20	12	0.6	no
Kashaf et al. 2022	Nature Microbiology	Integrating cultivation and metagenomics for a multi-kingdom view of skin microbiome diversity and functions	Skin Microbial Genome Collection (SMGC)	Kashaf.et.al.2022	20	12	0.6	no
Borges et al. 2022	Nature Microbiology	Widespread stop-codon recoding in bacteriophages may regulate translation of lytic genes	na	Borges.et.al.2022	24	18	0.75	no
Kavagutti et al. 2019	Microbiome	Phage-centric ecological interactions in aquatic ecosystems revealed through ultra-deep metagenomics	na	Kavagutti.et.al.2019	27	26	0.962963	no
Liao et al. 2022	Nature Communications	Response of soil viral communities to land use changes	na	Liao.et.al.2022	29	24	0.827586	no
Weinheimer and Aylward 2022	ISME Journal	Infection strategy and biogeography distinguish cosmopolitan groups of marine jumbo bacteriophages	na	Weinheimer.and.Aylward.2022	31	30	0.967742	no
Gregory et al. 2020	Cell Host & Microbe	The Gut Virome Database Reveals Age-Dependent Patterns of Virome Diversity in the Human Gut	Gut Virome Database (GVD)	Gregory.et.al.2020	34	19	0.558824	no
George et al. 2024	bioRxiv	Discarded diversity: Novel megaphages, auxiliary metabolic genes, and virally encoded CRISPR-Cas systems in landfills	na	George.et.al.2024	40	33	0.825	yes
Sato et al. 2023	Applied and Environmental Microbiology	A rumen virosphere with implications of contribution to fermentation and methane production, and endemism in cattle breeds and individuals	RVG	Sato.et.al.2023	42	39	0.928571	no
Liu et al. 2023	Science Bulletin	Diversity and function of mountain and polar supraglacial DNA viruses	supraglacial virus genome (SgVG) catalog	Liu.et.al.2023	51	9	0.176471	no
Gregory et al. 2019	Cell	Marine DNA Viral Macro- and Microdiversity from Pole to Pole	PIGEONv2.0	Gregory.et.al.2019	58	40	0.689655	no
Horst et al. 2023	ISME Journal	Dispersal, habitat filtering, and eco-evolutionary dynamics as drivers of local and global wetland viral biogeography	PIGEONv2.0	Horst.et.al.2023	60	42	0.7	no
Horst et al. 2021	Microbiome	Minnesota peat viromes reveal terrestrial and aquatic niche partitioning for local and global viral populations	PIGEONv2.0	Horst.et.al.2021	67	9	0.134328	no
Shkoporov et al. 2019	Cell Host & Microbe	The human gut virome is highly diverse, stable, and individual specific	na	Shkoporov.et.al.2019	78	6	0.0769231	no
Tian et al. 2024	Microbiome	Prokaryotic-virus-encoded auxiliary metabolic genes throughout the global oceans	na	Tian.et.al.2024	96	81	0.84375	yes
Camarillo-guerrero et al. 2021	Cell	Massive expansion of human gut bacteriophage diversity	Gut Phage Database (GPD)	Camarillo-guerrero.et.al.2021	118	79	0.669492	no
Tisza and Buck 2021	PNAS	A catalog of tens of thousands of viruses from human metagenomes reveals hidden associations with chronic diseases	Cenote Human Virome Database (CHVD)	Tisza.and.Buck.2021	119	93	0.781513	no
Ma et al. 2024	Nature Ecology and Evolution	Biogeographic patterns and drivers of soil viromes	Global Soil Virome dataset (GSV)	Ma.et.al.2024	127	113	0.889764	no
Paez-Espino et al. 2016	Nature	Uncovering Earth's virome	PIGEONv2.0	Paez-Espino.et.al.2016	142	96	0.676056	no
Lui et al. 2024	mSystems	Decomposing a San Francisco estuary microbiome using long-read metagenomics reveals species- and strain-level dominance from picoeukaryotes to viruses	na	Lui.et.al.2024	203	181	0.891626	no
Wu et al. 2024	Nature Communications	Unveiling the unknown viral world in groundwater	Groundwater Virome Catalogue (GWVC)	Wu.et.al.2024	203	147	0.724138	no
An et al. 2024	Nature Communications	Global diversity and ecological functions of viruses inhabiting oil reservoirs	na	An.et.al.2024	211	7	0.0331754	no
Chen et al. 2024	Nature Microbiology	COBRA improves the completeness and contiguity of viral genomes assembled from metagenomes	na	Chen.et.al.2024	268	260	0.970149	yes
Zhou et al. 2024	Nature Microbiology	﻿Unravelling viral ecology and evolution over 20 years in a freshwater lake	na	Zhou.et.al.2025	291	248	0.852234	no
Al-Shayeb et al. 2020	Nature	Clades of huge phages from across Earth’s ecosystems	na	Al-Shayeb.et.al.2020	335	330	0.985075	yes
Liao et al. 2025	Microbiome	Evolutionary diversification and succession of soil huge phages in glacier foreland	na	Liao.et.al.2024	411	405	0.985401	yes
Carter et al. 2023	Cell	Ultra-deep sequencing of Hadza hunter-gatherers recovers vanishing gut microbes	na	Carter.et.al.2023	563	477	0.847247	no
Nayfach et al. 2021	Nature Microbiology	Metagenomic compendium of 189,680 DNA viruses from the human gut microbiome	Metagenomic Gut Virus (MGV)	Nayfach.et.al.2021	744	586	0.787634	no
Camargo et al. 2023	NAR	IMG/VR v4: an expanded database of uncultivated virus genomes within a framework of extensive functional, taxonomic, and ecological metadata	IMG/VR v4	Camargo.et.al.2023	5181	5009	0.966802	no
López-Beltrán et al. 2024	ISME Journal	Dynamics of CRISPR-mediated virus-host interactions in the human gut microbiome	na	Not available	?	?	?	no
Iyer et al. 2021	Viruses	Jumbo phages: A comparative genomic overview of core functions and adaptions for biological conflicts	na	Not available	?	?	?	no
Lu et al. 2024	Communications Biology	Metagenomic analysis reveals high diversity of gut viromes in yaks (Bos grunniens) from the Qinghai-Tibet Plateau	na	Not available	?	?	?	no
Bouderka et al. 2024	bioRxiv	Tripartite interaction of a patescibacterial epibiont, a methylotrophic gammaproteobacterial host and a jumbo phage	na	Not available	?	?	?	no
Valadez-Cano et al. 2023	bioRxiv	Novel lytic and lysogenic cyanophages predicted to infect Microcoleus associated with anatoxin-producing benthic mats	na	Not available	?	?	?	no
Minch et al. 2023	mSphere	Phylogenetic diversity and functional potential of large and cell-associated viruses in the Bay of Bengal	na	Not available	?	?	?	no
Gao et al. 2024	Nature Communications	Eco-evolutionary dynamics of gut phageome in wild gibbons (Hoolock tianxing) with seasonal diet variations	na	Not available	?	?	?	no
Lin et al. 2023	Nature Communications	The genomic landscape of reference genomes of cultivated human gut bacteria	na	Not available	?	?	?	no
Chen et al. 2021	Nature Communications	Prokaryotic viruses impact functional microorganisms in nutrient removal and carbon cycle in wastewater treatment plants	na	Not available	?	?	?	no
Soto-Perez et al. 2019	Cell Host & Microbe	CRISPR-Cas System of a Prevalent Human Gut Bacterium Reveals Hyper-targeting against Phages in a Human Virome Catalog	na	Not available	?	?	?	no
Carr et al. 2020	bioRxiv	The human oral phageome is highly diverse and rich in jumbo phages	na	Not available	?	?	?	no
NCBI	na	na	NCBI	NCBI.2024.phages.200kbp	954	816	0.855346	no
NCBI	na	na	NCBI	NCBI.2024.virus.200kbp	6	6	1	no

## Sheet: ST2
Supplementary Table 2 | The general information of the confirmed huge phage genomes. The "Modified_name" was applied for description convenience. The Habitat_1 assignment was generally based on IMG/VR information, those could not be determined were assigned as "Unknown". The genome quality was evaluated using CheckV. The species-level clusters were defined at ≥95% genome similarity across ≥85% of…
Original_name	Modified_name	Length(bp)	Reference	Habitat_1	Habitat_2	GC content	CheckV_quality	miuvig_quality	Non-redundant geNome representative?	Species-level cluster IDs (Figure 1d)	Species-level cluster representatives?	Species-level cluster representatives taxonomy
IMGVR_UViG_3300045988_084730	huge_phage_2220	200391	Camargo.et.al.2023	Host-associated;Mammals: Human;Digestive system	Animal digestive system	0.32476	High-quality	High-quality	Yes	/	Yes	Viruses;Duplodnaviria;Heunggongvirae;Uroviricota;Caudoviricetes
IMGVR_UViG_3300045988_068728	huge_phage_2383	280922	Camargo.et.al.2023	Host-associated;Mammals: Human;Digestive system	Animal digestive system	0.34606	High-quality	High-quality	Yes	/	Yes	Viruses;Duplodnaviria;Heunggongvirae;Uroviricota;Caudoviricetes
IMGVR_UViG_2740892352_000003	huge_phage_2814	240550	Camargo.et.al.2023	Unknown	Unknown	0.271561	High-quality	High-quality	Yes	/	Yes	Viruses;Duplodnaviria;Heunggongvirae;Uroviricota;Caudoviricetes
IMGVR_UViG_3300045988_105517	huge_phage_3638	253222	Camargo.et.al.2023	Host-associated;Mammals: Human;Digestive system	Animal digestive system	0.356146	Complete	High-quality	Yes	/	Yes	Viruses;Duplodnaviria;Heunggongvirae;Uroviricota;Caudoviricetes
IMGVR_UViG_3300006456_000001	huge_phage_5299	226865	Camargo.et.al.2023	Host-associated;Mammals: Human;Integumentary system	Others	0.285915	High-quality	High-quality	Yes	/	Yes	Viruses;Duplodnaviria;Heunggongvirae;Uroviricota;Caudoviricetes
IMGVR_UViG_3300045988_123571	huge_phage_5565	201850	Camargo.et.al.2023	Host-associated;Mammals: Human;Digestive system	Animal digestive system	0.454808	High-quality	High-quality	Yes	/	Yes	Viruses;Duplodnaviria;Heunggongvirae;Uroviricota;Caudoviricetes
IMGVR_UViG_3300023488_000162	huge_phage_6005	204792	Camargo.et.al.2023	Host-associated;Mammals: Human;Digestive system	Animal digestive system	0.452503	High-quality	High-quality	Yes	/	Yes	Viruses;Duplodnaviria;Heunggongvirae;Uroviricota;Caudoviricetes
IMGVR_UViG_3300029784_000276	huge_phage_7474	218378	Camargo.et.al.2023	Host-associated;Human;Digestive system	Animal digestive system	0.365435	High-quality	High-quality	Yes	/	Yes	Viruses;Duplodnaviria;Heunggongvirae;Uroviricota;Caudoviricetes
IMGVR_UViG_3300008556_000158	huge_phage_7630	211084	Camargo.et.al.2023	Host-associated;Human;Digestive system	Animal digestive system	0.229572	High-quality	High-quality	Yes	/	Yes	Viruses;Duplodnaviria;Heunggongvirae;Uroviricota;Caudoviricetes
IMGVR_UViG_3300029413_000001	huge_phage_3181	222067	Camargo.et.al.2023	Host-associated;Human;Digestive system	Animal digestive system	0.351043	High-quality	High-quality	Yes	/	No	/
IMGVR_UViG_3300029432_000423	huge_phage_7863	217578	Camargo.et.al.2023	Host-associated;Human;Digestive system	Animal digestive system	0.365464	High-quality	High-quality	Yes	/	No	/
IMGVR_UViG_7000000564_000061	huge_phage_4822	238862	Camargo.et.al.2023	Host-associated;Human;Digestive system	Animal digestive system	0.336369	High-quality	High-quality	Yes	cluster15	No	/
uvig_458124	huge_phage_3666	224367	Camarillo-guerrero.et.al.2021	Host-associated;Mammals: Human;Digestive system	Animal digestive system	0.351308	High-quality	High-quality	Yes	/	Yes	Viruses;Duplodnaviria;Heunggongvirae;Uroviricota;Caudoviricetes
uvig_551156	huge_phage_8783	208530	Camarillo-guerrero.et.al.2021	Host-associated;Mammals: Human;Digestive system	Animal digestive system	0.527099	High-quality	High-quality	Yes	/	Yes	Viruses;Duplodnaviria;Heunggongvirae;Uroviricota;Caudoviricetes
uvig_440723	huge_phage_6456	223708	Camarillo-guerrero.et.al.2021	Host-associated;Mammals: Human;Digestive system	Animal digestive system	0.351476	High-quality	High-quality	Yes	/	No	/
Hadza_MoBio_hadza-I-L_M_10_2632__NODE_26_length_318752_cov_6.763427	huge_phage_2258	318752	Carter.et.al.2023	Host-associated;Mammals: Human;Digestive system	Animal digestive system	0.392979	High-quality	High-quality	Yes	/	Yes	Viruses;Duplodnaviria;Heunggongvirae;Uroviricota;Caudoviricetes
Hadza_MoBio_hadza-A-D_K_14_1158__NODE_80_length_209283_cov_31.299819	huge_phage_6639	209283	Carter.et.al.2023	Host-associated;Mammals: Human;Digestive system	Animal digestive system	0.399894	Complete	High-quality	Yes	/	Yes	Viruses;Duplodnaviria;Heunggongvirae;Uroviricota;Caudoviricetes
MGV-GENOME-0379689	huge_phage_1779	224717	Nayfach.et.al.2021	Host-associated;Mammals: Human;Digestive system	Animal digestive system	0.324386	High-quality	High-quality	Yes	/	Yes	Viruses;Duplodnaviria;Heunggongvirae;Uroviricota;Caudoviricetes
MGV-GENOME-0379598	huge_phage_2020	216054	Nayfach.et.al.2021	Host-associated;Mammals: Human;Digestive system	Animal digestive system	0.327339	High-quality	High-quality	Yes	/	Yes	Viruses;Duplodnaviria;Heunggongvirae;Uroviricota;Caudoviricetes
MGV-GENOME-0379421	huge_phage_2982	201680	Nayfach.et.al.2021	Host-associated;Mammals: Human;Digestive system	Animal digestive system	0.332943	High-quality	High-quality	Yes	/	Yes	Viruses;Duplodnaviria;Heunggongvirae;Uroviricota;Caudoviricetes
MGV-GENOME-0380072	huge_phage_4466	282124	Nayfach.et.al.2021	Host-associated;Mammals: Human;Digestive system	Animal digestive system	0.351473	High-quality	High-quality	Yes	/	Yes	Viruses;Duplodnaviria;Heunggongvirae;Uroviricota;Caudoviricetes;Crassvirales
MGV-GENOME-0380014	huge_phage_6132	270131	Nayfach.et.al.2021	Host-associated;Mammals: Human;Digestive system	Animal digestive system	0.346128	High-quality	High-quality	Yes	/	No	/
MT135025.1_UNVERIFIED_ORG:_Vibrio_phage_V07,_complete_genome	huge_phage_667	349331	NCBI.2024.phages.200kbp	water	Freshwater	0.431387	High-quality	High-quality	Yes	/	Yes	Viruses;Duplodnaviria;Heunggongvirae;Uroviricota;Caudoviricetes
MW373745.1_UNVERIFIED:_Campylobacter_phage_CJLB-13,_partial_genome	huge_phage_720	210101	NCBI.2024.phages.200kbp	poultry feces	Animal digestive system	0.276438	High-quality	High-quality	Yes	/	Yes	Viruses;Duplodnaviria;Heunggongvirae;Uroviricota;Caudoviricetes
PP355766.1_Klebsiella_phage_vB_Kpn_AM_K4,_complete_genome	huge_phage_726	288685	NCBI.2024.phages.200kbp	backwaters	Others	0.41857	High-quality	High-quality	Yes	/	Yes	Viruses;Duplodnaviria;Heunggongvirae;Uroviricota;Caudoviricetes
MN794232.1_Vibrio_phage_VH1_2019,_complete_genome	huge_phage_1027	246059	NCBI.2024.phages.200kbp	Unknown	Unknown	0.425845	High-quality	High-quality	Yes	/	No	/
AY283928.2_Bacteriophage_KVP40,_complete_genome	huge_phage_416	244834	NCBI.2024.phages.200kbp	Unknown	Unknown	0.425995	High-quality	High-quality	Yes	/	No	/
MT135026.1_Vibrio_phage_V09,_complete_genome	huge_phage_430	243881	NCBI.2024.phages.200kbp	water	Freshwater	0.426364	High-quality	High-quality	Yes	/	No	/
OR538032.1_Vibrio_phage_PG216,_complete_genome	huge_phage_756	244027	NCBI.2024.phages.200kbp	seawater	Marine	0.426703	High-quality	High-quality	Yes	/	No	/
PP712906.1_Vibrio_phage_TCU-VP03-AIR1,_complete_genome	huge_phage_836	245585	NCBI.2024.phages.200kbp	Unknown	Unknown	0.425722	Complete	High-quality	Yes	/	No	/
PP355768.1_Klebsiella_phage_vB_Kpn_AM_K6,_complete_genome	huge_phage_904	261044	NCBI.2024.phages.200kbp	effluent treatment plant	WWTP	0.418654	High-quality	High-quality	Yes	/	No	/
ON190024.1_Vibrio_phage_PVA8,_partial_genome	huge_phage_916	246888	NCBI.2024.phages.200kbp	Unknown	Unknown	0.426043	High-quality	High-quality	Yes	/	No	/
JN849462.1_Vibriophage_phi-pp2,_complete_genome	huge_phage_962	246421	NCBI.2024.phages.200kbp	Unknown	Unknown	0.425548	High-quality	High-quality	Yes	/	No	/
metaspades_NG-14069_923T8_lib221224_5627_NODE_1_length_515849_cov_31.2426_1	huge_phage_1089	234166	Shkoporov.et.al.2019	Host-associated;Mammals: Human;Digestive system	Animal digestive system	0.349799	High-quality	High-quality	Yes	/	Yes	Viruses;Duplodnaviria;Heunggongvirae;Uroviricota;Caudoviricetes
ALT_09252017_20_scaffold_47_prodigal-single_1	huge_phage_1246	204443	Al-Shayeb.et.al.2020	Environmental;Aquatic;Freshwater	Freshwater	0.395665	High-quality	High-quality	Yes	/	Yes	Viruses;Duplodnaviria;Heunggongvirae;Uroviricota;Caudoviricetes
pig_ID_885_F13_scaffold_14_curated_prodigal-single_1	huge_phage_1258	218578	Al-Shayeb.et.al.2020	Host-associated;Mammals;Digestive system	Animal digestive system	0.408783	Medium-quality	Genome-fragment	Yes	/	Yes	Viruses;Duplodnaviria;Heunggongvirae;Uroviricota;Caudoviricetes
BML_coassembly_scaffold_214_prodigal-single_1	huge_phage_1273	259816	Al-Shayeb.et.al.2020	Environmental;Aquatic;Freshwater	Freshwater	0.484655	Medium-quality	Genome-fragment	Yes	/	Yes	Viruses;Duplodnaviria;Heunggongvirae;Uroviricota;Caudoviricetes
LSDeep1_scaffold_41_prodigal-single_1	huge_phage_1275	400275	Al-Shayeb.et.al.2020	Unknown	Unknown	0.44387	High-quality	High-quality	Yes	/	Yes	Viruses;Duplodnaviria;Heunggongvirae;Uroviricota;Caudoviricetes
As_gut_js4906-26-3_S26_scaffold_18_curated_prodigal-single_1	huge_phage_1314	243012	Al-Shayeb.et.al.2020	Host-associated;Human;Digestive system	Animal digestive system	0.475396	High-quality	High-quality	Yes	/	Yes	Viruses;Duplodnaviria;Heunggongvirae;Uroviricota;Caudoviricetes
LacPavin_0818_WC45_scaffold_30120_prodigal-single_1	huge_phage_1352	205849	Al-Shayeb.et.al.2020	Environmental;Aquatic;Freshwater	Freshwater	0.463048	High-quality	High-quality	Yes	/	Yes	Viruses;Duplodnaviria;Heunggongvirae;Uroviricota;Caudoviricetes
PH2015_14_scaffold_1_prodigal-single_1	huge_phage_1390	205023	Al-Shayeb.et.al.2020	Environmental;Aquatic;Freshwater	Freshwater	0.487467	Medium-quality	Genome-fragment	Yes	/	Yes	Viruses;Duplodnaviria;Heunggongvirae;Uroviricota;Caudoviricetes
CG_2015-01t_scaffold_23_prodigal-single_1	huge_phage_1453	262850	Al-Shayeb.et.al.2020	Environmental;Terrestrial;Deep subsurface	Deep subsurface	0.321853	Medium-quality	Genome-fragment	Yes	/	Yes	Viruses;Duplodnaviria;Heunggongvirae;Uroviricota;Caudoviricetes
BML_coassembly_scaffold_25_prodigal-single	huge_phage_1467	322368	Al-Shayeb.et.al.2020	Environmental;Aquatic;Freshwater	Freshwater	0.445261	Medium-quality	Genome-fragment	Yes	/	Yes	Viruses;Duplodnaviria;Heunggongvirae;Uroviricota;Caudoviricetes
LacPavin_0818_WC40_scaffold_407201_prodigal-single	huge_phage_1509	228957	Al-Shayeb.et.al.2020	Environmental;Aquatic;Freshwater	Freshwater	0.296457	Medium-quality	Genome-fragment	Yes	/	Yes	Viruses;Duplodnaviria;Heunggongvirae;Uroviricota;Caudoviricetes
SRR1747053_scaffold_1_prodigal-single	huge_phage_1522	232919	Al-Shayeb.et.al.2020	Host-associated;Mammals;Digestive system	Animal digestive system	0.341222	Complete	High-quality	Yes	/	Yes	Viruses;Duplodnaviria;Heunggongvirae;Uroviricota;Caudoviricetes
BML_coassembly_scaffold_13_prodigal-single	huge_phage_1523	355989	Al-Shayeb.et.al.2020	Environmental;Aquatic;Freshwater	Freshwater	0.406847	Complete	High-quality	Yes	/	Yes	Viruses;Duplodnaviria;Heunggongvirae;Uroviricota;Caudoviricetes
term2_saliva_scaffold_0_prodigal-single	huge_phage_1536	269650	Al-Shayeb.et.al.2020	Host-associated;Human;Digestive system	Animal digestive system	0.334893	Complete	High-quality	Yes	/	Yes	Viruses;Duplodnaviria;Heunggongvirae;Uroviricota;Caudoviricetes
BML_coassembly_scaffold_69_prodigal-single	huge_phage_1544	312403	Al-Shayeb.et.al.2020	Environmental;Aquatic;Freshwater	Freshwater	0.300071	Complete	High-quality	Yes	/	Yes	Viruses;Duplodnaviria;Heunggongvirae;Uroviricota;Caudoviricetes
S27_BME27_1069154_prodigal-single	huge_phage_1569	437772	Al-Shayeb.et.al.2020	Unknown	Unknown	0.34685	Complete	High-quality	Yes	/	Yes	Viruses;Duplodnaviria;Heunggongvirae;Uroviricota;Caudoviricetes
subassembly_31bins_VIRSorter_scaffold_0-circular-cat_2_SIZE_382860bp_prodigal-single	huge_phage_1617	382860	Al-Shayeb.et.al.2020	Unknown	Unknown	0.416813	Medium-quality	Genome-fragment	Yes	/	Yes	Viruses;Duplodnaviria;Heunggongvirae;Uroviricota;Caudoviricetes
k141_307134_prodigal-single	huge_phage_1654	214364	Al-Shayeb.et.al.2020	Unknown	Unknown	0.289204	Complete	High-quality	Yes	/	Yes	Viruses;Duplodnaviria;Heunggongvirae;Uroviricota;Caudoviricetes
LacPavin_0818_WC40_scaffold_120392_prodigal-single	huge_phage_1710	290974	Al-Shayeb.et.al.2020	Environmental;Aquatic;Freshwater	Freshwater	0.311444	Medium-quality	Genome-fragment	Yes	/	Yes	Viruses;Duplodnaviria;Heunggongvirae;Uroviricota;Caudoviricetes
ALT_07252016_14_scaffold_0_prodigal-single	huge_phage_1721	346700	Al-Shayeb.et.al.2020	Environmental;Aquatic;Freshwater	Freshwater	0.400666	Complete	High-quality	Yes	/	Yes	Viruses;Duplodnaviria;Heunggongvirae;Uroviricota;Caudoviricetes
S2_009_000_R2_scaffold_4_prodigal-single	huge_phage_1758	469944	Al-Shayeb.et.al.2020	NICU Room Metagenomes	Others	0.455863	Complete	High-quality	Yes	/	Yes	Viruses;Duplodnaviria;Heunggongvirae;Uroviricota;Caudoviricetes
Salt_Pond_R2_restored_H2O_MG_scaffold_2_prodigal-single	huge_phage_1866	284351	Al-Shayeb.et.al.2020	Environmental;Aquatic;Non-marine Saline and Alkaline	Non-marine Saline and Alkaline	0.458943	Medium-quality	Genome-fragment	Yes	/	Yes	Viruses;Duplodnaviria;Heunggongvirae;Uroviricota;Caudoviricetes
SRR1747032_scaffold_22_prodigal-single	huge_phage_1877	234672	Al-Shayeb.et.al.2020	Host-associated;Mammals;Digestive system	Animal digestive system	0.366678	High-quality	High-quality	Yes	/	Yes	Viruses;Duplodnaviria;Heunggongvirae;Uroviricota;Caudoviricetes
scnpilot_p_inoc_scaffold_115_prodigal-single	huge_phage_1882	252802	Al-Shayeb.et.al.2020	Engineered;Biotransformation;Bioreactor	Bioreactor	0.524581	Medium-quality	Genome-fragment	Yes	/	Yes	Viruses;Duplodnaviria;Heunggongvirae;Uroviricota;Caudoviricetes
ALT_09252017_20_scaffold_29_prodigal-single	huge_phage_1904	274127	Al-Shayeb.et.al.2020	Environmental;Aquatic;Freshwater	Freshwater	0.235125	Medium-quality	Genome-fragment	Yes	/	Yes	Viruses;Duplodnaviria;Heunggongvirae;Uroviricota;Caudoviricetes
Filtrate_w_scaffold_3_prodigal-single	huge_phage_1910	331944	Al-Shayeb.et.al.2020	Unknown	Unknown	0.326832	Complete	High-quality	Yes	/	Yes	Viruses;Duplodnaviria;Heunggongvirae;Uroviricota;Caudoviricetes
LacPavin_0818_WC50_scaffold_3810_prodigal-single	huge_phage_1992	240711	Al-Shayeb.et.al.2020	Environmental;Aquatic;Freshwater	Freshwater	0.413945	Medium-quality	Genome-fragment	Yes	/	Yes	Viruses;Duplodnaviria;Heunggongvirae;Uroviricota;Caudoviricetes
S2_003_000_R3_scaffold_4_prodigal-single	huge_phage_2084	234170	Al-Shayeb.et.al.2020	NICU Room Metagenomes	Others	0.582637	Complete	High-quality	Yes	/	Yes	Viruses;Duplodnaviria;Heunggongvirae;Uroviricota;Caudoviricetes
BML_08182015_1_5m_scaffold_19_prodigal-single	huge_phage_2146	328581	Al-Shayeb.et.al.2020	Environmental;Aquatic;Freshwater	Freshwater	0.417352	Medium-quality	Genome-fragment	Yes	/	Yes	Viruses;Duplodnaviria;Heunggongvirae;Uroviricota;Caudoviricetes
SR-VP_4-6_scaffold_141_3489769_prodigal-single	huge_phage_2153	283523	Al-Shayeb.et.al.2020	Environmental;Terrestrial;Soil	Soil	0.568719	Medium-quality	Genome-fragment	Yes	/	Yes	Viruses;Duplodnaviria;Heunggongvirae;Uroviricota;Caudoviricetes
S2_009_000_R2_scaffold_40_prodigal-single	huge_phage_2176	268303	Al-Shayeb.et.al.2020	NICU Room Metagenomes	Others	0.483405	Complete	High-quality	Yes	/	Yes	Viruses;Duplodnaviria;Heunggongvirae;Uroviricota;Caudoviricetes
SR-VP_4-6_scaffold_141_559231_prodigal-single	huge_phage_2193	465583	Al-Shayeb.et.al.2020	Environmental;Terrestrial;Soil	Soil	0.628846	Complete	High-quality	Yes	/	Yes	Viruses;Duplodnaviria;Heunggongvirae;Uroviricota;Caudoviricetes
LacPavin_0818_WC55_scaffold_113784_prodigal-single	huge_phage_2395	286030	Al-Shayeb.et.al.2020	Environmental;Aquatic;Freshwater	Freshwater	0.340362	Complete	High-quality	Yes	/	Yes	Viruses;Duplodnaviria;Heunggongvirae;Uroviricota;Caudoviricetes
Salt_Pond_R2_C_D2_MG_scaffold_7_prodigal-single	huge_phage_2399	200585	Al-Shayeb.et.al.2020	Environmental;Aquatic;Non-marine Saline and Alkaline	Non-marine Saline and Alkaline	0.52128	Complete	High-quality	Yes	/	Yes	Viruses;Duplodnaviria;Heunggongvirae;Uroviricota;Caudoviricetes
ALT_09252017_20_scaffold_10_prodigal-single	huge_phage_2421	367691	Al-Shayeb.et.al.2020	Environmental;Aquatic;Freshwater	Freshwater	0.50633	High-quality	High-quality	Yes	/	Yes	Viruses;Duplodnaviria;Heunggongvirae;Uroviricota;Caudoviricetes
SRR1747035_scaffold_2_prodigal-single	huge_phage_2483	235180	Al-Shayeb.et.al.2020	Host-associated;Mammals;Digestive system	Animal digestive system	0.326333	Complete	High-quality	Yes	/	Yes	Viruses;Duplodnaviria;Heunggongvirae;Uroviricota;Caudoviricetes
SRR1747023_scaffold_5_prodigal-single	huge_phage_2684	210486	Al-Shayeb.et.al.2020	Host-associated;Mammals;Digestive system	Animal digestive system	0.319009	Complete	High-quality	Yes	/	Yes	Viruses;Duplodnaviria;Heunggongvirae;Uroviricota;Caudoviricetes
SRR1747032_scaffold_1_prodigal-single	huge_phage_2685	313777	Al-Shayeb.et.al.2020	Host-associated;Mammals;Digestive system	Animal digestive system	0.321515	Complete	High-quality	Yes	/	Yes	Viruses;Duplodnaviria;Heunggongvirae;Uroviricota;Caudoviricetes
SRR1747035_scaffold_3_prodigal-single	huge_phage_2738	213508	Al-Shayeb.et.al.2020	Host-associated;Mammals;Digestive system	Animal digestive system	0.333388	Complete	High-quality	Yes	/	Yes	Viruses;Duplodnaviria;Heunggongvirae;Uroviricota;Caudoviricetes
ALT_09252017_20_scaffold_16_prodigal-single	huge_phage_2810	357895	Al-Shayeb.et.al.2020	Environmental;Aquatic;Freshwater	Freshwater	0.392992	High-quality	High-quality	Yes	/	Yes	Viruses;Duplodnaviria;Heunggongvirae;Uroviricota;Caudoviricetes
PH2015_08_scaffold_0_prodigal-single	huge_phage_2843	305387	Al-Shayeb.et.al.2020	Environmental;Aquatic;Freshwater	Freshwater	0.342975	Complete	High-quality	Yes	/	Yes	Viruses;Duplodnaviria;Heunggongvirae;Uroviricota;Caudoviricetes
pig_ID_3640_F65_scaffold_1_curated_prodigal-single	huge_phage_2848	207712	Al-Shayeb.et.al.2020	Host-associated;Mammals;Digestive system	Animal digestive system	0.305554	Medium-quality	Genome-fragment	Yes	/	Yes	Viruses;Duplodnaviria;Heunggongvirae;Uroviricota;Caudoviricetes
term1_saliva_scaffold_14_prodigal-single	huge_phage_2849	256090	Al-Shayeb.et.al.2020	Host-associated;Human;Digestive system	Animal digestive system	0.50016	High-quality	High-quality	Yes	/	Yes	Viruses;Duplodnaviria;Heunggongvirae;Uroviricota;Caudoviricetes
qh_7_scaffold_1_prodigal-single	huge_phage_2916	468579	Al-Shayeb.et.al.2020	Amundson_desert	Others	0.405099	High-quality	High-quality	Yes	/	Yes	Viruses;Duplodnaviria;Heunggongvirae;Uroviricota;Caudoviricetes
SR-VP_0-2_scaffold_141_2072294_prodigal-single	huge_phage_2928	231505	Al-Shayeb.et.al.2020	Environmental;Terrestrial;Soil	Soil	0.616583	High-quality	High-quality	Yes	/	Yes	Viruses;Duplodnaviria;Heunggongvirae;Uroviricota;Caudoviricetes
pig_ID_2229_F59_scaffold_2_curated_prodigal-single	huge_phage_2948	267703	Al-Shayeb.et.al.2020	Host-associated;Mammals;Digestive system	Animal digestive system	0.274508	High-quality	High-quality	Yes	/	Yes	Viruses;Duplodnaviria;Heunggongvirae;Uroviricota;Caudoviricetes
SR-VP_4-6_scaffold_141_5680703_prodigal-single	huge_phage_2952	378476	Al-Shayeb.et.al.2020	Environmental;Terrestrial;Soil	Soil	0.480731	Medium-quality	Genome-fragment	Yes	/	Yes	Viruses;Duplodnaviria;Heunggongvirae;Uroviricota;Caudoviricetes
SR-VP_2-4_scaffold_141_2952615_prodigal-single	huge_phage_3039	215538	Al-Shayeb.et.al.2020	Environmental;Terrestrial;Soil	Soil	0.384429	Complete	High-quality	Yes	/	Yes	Viruses;Duplodnaviria;Heunggongvirae;Uroviricota;Caudoviricetes
ALT_09252017_20_scaffold_43_prodigal-single	huge_phage_3082	223193	Al-Shayeb.et.al.2020	Environmental;Aquatic;Freshwater	Freshwater	0.396352	Complete	High-quality	Yes	/	Yes	Viruses;Duplodnaviria;Heunggongvirae;Uroviricota;Caudoviricetes
BML_08182015_6_5m_scaffold_5_curated_closed_complete_prodigal-single	huge_phage_3176	238368	Al-Shayeb.et.al.2020	Environmental;Aquatic;Freshwater	Freshwater	0.3199	High-quality	High-quality	Yes	/	Yes	Viruses;Duplodnaviria;Heunggongvirae;Uroviricota;Caudoviricetes
SRR1747065_scaffold_38_prodigal-single	huge_phage_3179	249840	Al-Shayeb.et.al.2020	Host-associated;Mammals;Digestive system	Animal digestive system	0.337216	Complete	High-quality	Yes	/	Yes	Viruses;Duplodnaviria;Heunggongvirae;Uroviricota;Caudoviricetes
term6_saliva_scaffold_0_prodigal-single	huge_phage_3239	291442	Al-Shayeb.et.al.2020	Host-associated;Human;Digestive system	Animal digestive system	0.499146	High-quality	High-quality	Yes	/	Yes	Viruses;Duplodnaviria;Heunggongvirae;Uroviricota;Caudoviricetes
S20_GE20_scaffold_13766_prodigal-single	huge_phage_3355	256127	Al-Shayeb.et.al.2020	Groundwater	Groundwater	0.360985	High-quality	High-quality	Yes	/	Yes	Viruses;Duplodnaviria;Heunggongvirae;Uroviricota;Caudoviricetes
FFC_09252017_16_scaffold_4_prodigal-single	huge_phage_3365	214014	Al-Shayeb.et.al.2020	Environmental;Aquatic;Freshwater	Freshwater	0.38361	Medium-quality	Genome-fragment	Yes	/	Yes	Viruses;Duplodnaviria;Heunggongvirae;Uroviricota;Caudoviricetes
BML_coassembly_scaffold_37_prodigal-single	huge_phage_3404	222739	Al-Shayeb.et.al.2020	Environmental;Aquatic;Freshwater	Freshwater	0.397829	Complete	High-quality	Yes	/	Yes	Viruses;Duplodnaviria;Heunggongvirae;Uroviricota;Caudoviricetes
LacPavin_0818_WC40_scaffold_26136_prodigal-single	huge_phage_3439	339376	Al-Shayeb.et.al.2020	Environmental;Aquatic;Freshwater	Freshwater	0.380687	Medium-quality	Genome-fragment	Yes	/	Yes	Viruses;Duplodnaviria;Heunggongvirae;Uroviricota;Caudoviricetes
PH2015_18_scaffold_0_prodigal-single	huge_phage_3448	356193	Al-Shayeb.et.al.2020	Environmental;Aquatic;Freshwater	Freshwater	0.39587	Complete	High-quality	Yes	/	Yes	Viruses;Duplodnaviria;Heunggongvirae;Uroviricota;Caudoviricetes
Ig12092_scaffold_5_curated_closed_complete_prodigal-single	huge_phage_3462	634780	Al-Shayeb.et.al.2020	Human Metagenome	Animal digestive system	0.291811	High-quality	High-quality	Yes	/	Yes	Viruses;Duplodnaviria;Heunggongvirae;Uroviricota;Caudoviricetes
SRR1747027_scaffold_2_prodigal-single	huge_phage_3494	271439	Al-Shayeb.et.al.2020	Host-associated;Mammals;Digestive system	Animal digestive system	0.363297	High-quality	High-quality	Yes	/	Yes	Viruses;Duplodnaviria;Heunggongvirae;Uroviricota;Caudoviricetes
04302015_21_scaffold_6_prodigal-single	huge_phage_3597	206954	Al-Shayeb.et.al.2020	Unassigned	Freshwater	0.541528	Low-quality	Genome-fragment	Yes	/	Yes	Viruses;Duplodnaviria;Heunggongvirae;Uroviricota;Caudoviricetes
js4906-26-4_S27_scaffold_6_prodigal-single	huge_phage_3598	231220	Al-Shayeb.et.al.2020	Host-associated;Human;Digestive system	Animal digestive system	0.289395	Complete	High-quality	Yes	/	Yes	Viruses;Duplodnaviria;Heunggongvirae;Uroviricota;Caudoviricetes
RifSed_csp1_19ft_3_scaffold_4_curated_prodigal-single	huge_phage_3605	503412	Al-Shayeb.et.al.2020	Environmental;Terrestrial;Deep subsurface	Deep subsurface	0.29206	High-quality	High-quality	Yes	/	Yes	Viruses;Duplodnaviria;Heunggongvirae;Uroviricota;Caudoviricetes
RifSed_csp2_10ft_3_scaffold_6_prodigal-single	huge_phage_3669	419687	Al-Shayeb.et.al.2020	Environmental;Terrestrial;Deep subsurface	Deep subsurface	0.354133	High-quality	High-quality	Yes	/	Yes	Viruses;Duplodnaviria;Heunggongvirae;Uroviricota;Caudoviricetes
SRR1747022_scaffold_36_prodigal-single	huge_phage_3680	218820	Al-Shayeb.et.al.2020	Host-associated;Mammals;Digestive system	Animal digestive system	0.290339	Medium-quality	Genome-fragment	Yes	/	Yes	Viruses;Duplodnaviria;Heunggongvirae;Uroviricota;Caudoviricetes
LacPavin_0818_WC50_scaffold_71530_prodigal-single	huge_phage_3684	372084	Al-Shayeb.et.al.2020	Environmental;Aquatic;Freshwater	Freshwater	0.522291	Medium-quality	Genome-fragment	Yes	/	Yes	Viruses;Duplodnaviria;Heunggongvirae;Uroviricota;Caudoviricetes
SRR1747046_scaffold_4_prodigal-single	huge_phage_3872	214249	Al-Shayeb.et.al.2020	Host-associated;Mammals;Digestive system	Animal digestive system	0.323549	Medium-quality	Genome-fragment	Yes	/	Yes	Viruses;Duplodnaviria;Heunggongvirae;Uroviricota;Caudoviricetes
P0_An_pond3_S8_coassembly_k141_133253_prodigal-single	huge_phage_3898	349454	Al-Shayeb.et.al.2020	Environmental;Terrestrial;Deep subsurface	Deep subsurface	0.616937	Medium-quality	Genome-fragment	Yes	/	Yes	Viruses;Duplodnaviria;Heunggongvirae;Uroviricota;Caudoviricetes
SRR1747065_scaffold_0_prodigal-single	huge_phage_3923	343860	Al-Shayeb.et.al.2020	Host-associated;Mammals;Digestive system	Animal digestive system	0.260327	Complete	High-quality	Yes	/	Yes	Viruses;Duplodnaviria;Heunggongvirae;Uroviricota;Caudoviricetes
BML_coassembly_scaffold_108_prodigal-single	huge_phage_3945	217369	Al-Shayeb.et.al.2020	Environmental;Aquatic;Freshwater	Freshwater	0.355327	Complete	High-quality	Yes	/	Yes	Viruses;Duplodnaviria;Heunggongvirae;Uroviricota;Caudoviricetes
S22_GE22_scaffold_285059_prodigal-single	huge_phage_3969	401513	Al-Shayeb.et.al.2020	Groundwater	Groundwater	0.479703	Complete	High-quality	Yes	/	Yes	Viruses;Duplodnaviria;Heunggongvirae;Uroviricota;Caudoviricetes
PH2017_36_ELK_O_B_scaffold_2_prodigal-single	huge_phage_3998	332223	Al-Shayeb.et.al.2020	Environmental;Aquatic;Freshwater	Freshwater	0.430744	Complete	High-quality	Yes	/	Yes	Viruses;Duplodnaviria;Heunggongvirae;Uroviricota;Caudoviricetes
5H_04062016_scaffold_1_prodigal-single	huge_phage_4041	299394	Al-Shayeb.et.al.2020	Unknown	Unknown	0.251221	High-quality	High-quality	Yes	/	Yes	Viruses;Duplodnaviria;Heunggongvirae;Uroviricota;Caudoviricetes
SR-VP_2-4_scaffold_141_5652861_prodigal-single	huge_phage_4083	255737	Al-Shayeb.et.al.2020	Environmental;Terrestrial;Soil	Soil	0.392642	Complete	High-quality	Yes	/	Yes	Viruses;Duplodnaviria;Heunggongvirae;Uroviricota;Caudoviricetes
Salt_Pond_R1_B_H2O_MG_scaffold_1_prodigal-single	huge_phage_4084	305141	Al-Shayeb.et.al.2020	Environmental;Aquatic;Non-marine Saline and Alkaline	Non-marine Saline and Alkaline	0.371609	Medium-quality	Genome-fragment	Yes	/	Yes	Viruses;Duplodnaviria;Heunggongvirae;Uroviricota;Caudoviricetes
amazon_plume_scaffold_4_prodigal-single	huge_phage_4198	202948	Al-Shayeb.et.al.2020	Amazon River	Freshwater	0.352908	Complete	High-quality	Yes	/	Yes	Viruses;Duplodnaviria;Heunggongvirae;Uroviricota;Caudoviricetes
LacPavin_0818_WC40_scaffold_86355_prodigal-single	huge_phage_4212	307553	Al-Shayeb.et.al.2020	Environmental;Aquatic;Freshwater	Freshwater	0.361141	High-quality	High-quality	Yes	/	Yes	Viruses;Duplodnaviria;Heunggongvirae;Uroviricota;Caudoviricetes
BML_coassembly_scaffold_50_prodigal-single	huge_phage_4279	206479	Al-Shayeb.et.al.2020	Environmental;Aquatic;Freshwater	Freshwater	0.566958	Complete	High-quality	Yes	/	Yes	Viruses;Duplodnaviria;Heunggongvirae;Uroviricota;Caudoviricetes
pre3_saliva_scaffold_18_prodigal-single	huge_phage_4291	238173	Al-Shayeb.et.al.2020	Host-associated;Human;Digestive system	Animal digestive system	0.445617	High-quality	High-quality	Yes	/	Yes	Viruses;Duplodnaviria;Heunggongvirae;Uroviricota;Caudoviricetes
LSDeep1_scaffold_42_prodigal-single	huge_phage_4300	436626	Al-Shayeb.et.al.2020	Unknown	Unknown	0.600502	Complete	High-quality	Yes	/	Yes	Viruses;Duplodnaviria;Heunggongvirae;Uroviricota;Caudoviricetes
SRR1747065_scaffold_10_prodigal-single	huge_phage_4303	212667	Al-Shayeb.et.al.2020	Host-associated;Mammals;Digestive system	Animal digestive system	0.245266	Complete	High-quality	Yes	/	Yes	Viruses;Duplodnaviria;Heunggongvirae;Uroviricota;Caudoviricetes
BML_08042016_6_5m_scaffold_2_prodigal-single	huge_phage_4347	298487	Al-Shayeb.et.al.2020	Environmental;Aquatic;Freshwater	Freshwater	0.28815	High-quality	High-quality	Yes	/	Yes	Viruses;Duplodnaviria;Heunggongvirae;Uroviricota;Caudoviricetes
pig_ID_2419_F67_scaffold_44_curated_prodigal-single	huge_phage_4371	217230	Al-Shayeb.et.al.2020	Host-associated;Mammals;Digestive system	Animal digestive system	0.310693	Medium-quality	Genome-fragment	Yes	/	Yes	Viruses;Duplodnaviria;Heunggongvirae;Uroviricota;Caudoviricetes
FFC_09252017_16_scaffold_2_prodigal-single	huge_phage_4562	271315	Al-Shayeb.et.al.2020	Environmental;Aquatic;Freshwater	Freshwater	0.437532	Medium-quality	Genome-fragment	Yes	/	Yes	Viruses;Duplodnaviria;Heunggongvirae;Uroviricota;Caudoviricetes
Filtrate_w_scaffold_1_prodigal-single	huge_phage_4584	419969	Al-Shayeb.et.al.2020	Unknown	Unknown	0.29722	Complete	High-quality	Yes	/	Yes	Viruses;Duplodnaviria;Heunggongvirae;Uroviricota;Caudoviricetes
H1c1_full_scaffold_271_prodigal-single	huge_phage_4758	250550	Al-Shayeb.et.al.2020	East river	Freshwater	0.348729	High-quality	High-quality	Yes	/	Yes	Viruses;Duplodnaviria;Heunggongvirae;Uroviricota;Caudoviricetes
ALT_09252017_20_scaffold_111_prodigal-single	huge_phage_4763	238333	Al-Shayeb.et.al.2020	Environmental;Aquatic;Freshwater	Freshwater	0.351638	Medium-quality	Genome-fragment	Yes	/	Yes	Viruses;Duplodnaviria;Heunggongvirae;Uroviricota;Caudoviricetes
SR-VP_0-2_scaffold_141_6063796_prodigal-single	huge_phage_4764	258754	Al-Shayeb.et.al.2020	Environmental;Terrestrial;Soil	Soil	0.377919	High-quality	High-quality	Yes	/	Yes	Viruses;Duplodnaviria;Heunggongvirae;Uroviricota;Caudoviricetes
SR-VP_2-4_scaffold_141_2548329_prodigal-single	huge_phage_4774	230466	Al-Shayeb.et.al.2020	Environmental;Terrestrial;Soil	Soil	0.544714	High-quality	High-quality	Yes	/	Yes	Viruses;Duplodnaviria;Heunggongvirae;Uroviricota;Caudoviricetes
04302015_21_scaffold_10_prodigal-single	huge_phage_4775	226765	Al-Shayeb.et.al.2020	Unassigned	Freshwater	0.541212	Medium-quality	Genome-fragment	Yes	/	Yes	Viruses;Duplodnaviria;Heunggongvirae;Uroviricota;Caudoviricetes
LD_Run2_08_scaffold_35_prodigal-single	huge_phage_4875	235011	Al-Shayeb.et.al.2020	Human gut	Animal digestive system	0.273681	High-quality	High-quality	Yes	/	Yes	Viruses;Duplodnaviria;Heunggongvirae;Uroviricota;Caudoviricetes
SRR1747030_scaffold_3_prodigal-single	huge_phage_4940	213736	Al-Shayeb.et.al.2020	Host-associated;Mammals;Digestive system	Animal digestive system	0.339423	High-quality	High-quality	Yes	/	Yes	Viruses;Duplodnaviria;Heunggongvirae;Uroviricota;Caudoviricetes
JBCH_GD18_4_SO25_S179_scaffold_97345_prodigal-single	huge_phage_5089	214569	Al-Shayeb.et.al.2020	Groundwater	Groundwater	0.315153	Complete	High-quality	Yes	/	Yes	Viruses;Duplodnaviria;Heunggongvirae;Uroviricota;Caudoviricetes
SR-VP_0-2_scaffold_141_6534022_prodigal-single	huge_phage_5099	220518	Al-Shayeb.et.al.2020	Environmental;Terrestrial;Soil	Soil	0.494191	Medium-quality	Genome-fragment	Yes	/	Yes	Viruses;Duplodnaviria;Heunggongvirae;Uroviricota;Caudoviricetes
LacPavin_0818_WC55_scaffold_2946_prodigal-single	huge_phage_5104	252809	Al-Shayeb.et.al.2020	Environmental;Aquatic;Freshwater	Freshwater	0.356112	Complete	High-quality	Yes	/	Yes	Viruses;Duplodnaviria;Heunggongvirae;Uroviricota;Caudoviricetes
CG10_big_fil_rev_8_21_14_0-10_scaffold_17_prodigal-single	huge_phage_5117	368865	Al-Shayeb.et.al.2020	Environmental;Terrestrial;Deep subsurface	Deep subsurface	0.588955	Complete	High-quality	Yes	/	Yes	Viruses;Duplodnaviria;Heunggongvirae;Uroviricota;Caudoviricetes
BML_08182015_6_5m_scaffold_6_prodigal-single	huge_phage_5166	235627	Al-Shayeb.et.al.2020	Environmental;Aquatic;Freshwater	Freshwater	0.392391	Medium-quality	Genome-fragment	Yes	/	Yes	Viruses;Duplodnaviria;Heunggongvirae;Uroviricota;Caudoviricetes
pre1_saliva_scaffold_4_prodigal-single	huge_phage_5335	206174	Al-Shayeb.et.al.2020	Host-associated;Human;Digestive system	Animal digestive system	0.290803	Complete	High-quality	Yes	/	Yes	Viruses;Duplodnaviria;Heunggongvirae;Uroviricota;Caudoviricetes
BML_08042016_6_5m_scaffold_3_prodigal-single	huge_phage_5353	275198	Al-Shayeb.et.al.2020	Environmental;Aquatic;Freshwater	Freshwater	0.374763	High-quality	High-quality	Yes	/	Yes	Viruses;Duplodnaviria;Heunggongvirae;Uroviricota;Caudoviricetes
LacPavin_0818_WC45_scaffold_65992_prodigal-single	huge_phage_5436	301052	Al-Shayeb.et.al.2020	Environmental;Aquatic;Freshwater	Freshwater	0.302765	High-quality	High-quality	Yes	/	Yes	Viruses;Duplodnaviria;Heunggongvirae;Uroviricota;Caudoviricetes
S16_GE16_scaffold_10741_prodigal-single	huge_phage_5465	305730	Al-Shayeb.et.al.2020	Groundwater	Groundwater	0.605562	High-quality	High-quality	Yes	/	Yes	Viruses;Duplodnaviria;Heunggongvirae;Uroviricota;Caudoviricetes
LacPavin_0818_WC40_scaffold_15340_prodigal-single	huge_phage_5492	261948	Al-Shayeb.et.al.2020	Environmental;Aquatic;Freshwater	Freshwater	0.292794	High-quality	High-quality	Yes	/	Yes	Viruses;Duplodnaviria;Heunggongvirae;Uroviricota;Caudoviricetes
gwf2_scaffold_96_prodigal-single	huge_phage_5596	305866	Al-Shayeb.et.al.2020	Environmental;Terrestrial;Deep subsurface	Deep subsurface	0.409601	Medium-quality	Genome-fragment	Yes	/	Yes	Viruses;Duplodnaviria;Heunggongvirae;Uroviricota;Caudoviricetes
term3_saliva_scaffold_0_prodigal-single	huge_phage_5614	269031	Al-Shayeb.et.al.2020	Host-associated;Human;Digestive system	Animal digestive system	0.334378	Complete	High-quality	Yes	/	Yes	Viruses;Duplodnaviria;Heunggongvirae;Uroviricota;Caudoviricetes
LacPavin_0818_WC55_scaffold_56344_prodigal-single	huge_phage_5638	226594	Al-Shayeb.et.al.2020	Environmental;Aquatic;Freshwater	Freshwater	0.403393	Medium-quality	Genome-fragment	Yes	/	Yes	Viruses;Duplodnaviria;Heunggongvirae;Uroviricota;Caudoviricetes
SRR1747052_scaffold_19_prodigal-single	huge_phage_5670	246765	Al-Shayeb.et.al.2020	Host-associated;Mammals;Digestive system	Animal digestive system	0.551873	High-quality	High-quality	Yes	/	Yes	Viruses;Duplodnaviria;Heunggongvirae;Uroviricota;Caudoviricetes
Salt_Pond_R1_A_D2_MG_scaffold_27_prodigal-single	huge_phage_5685	216352	Al-Shayeb.et.al.2020	Environmental;Aquatic;Non-marine Saline and Alkaline	Non-marine Saline and Alkaline	0.400565	Complete	High-quality	Yes	/	Yes	Viruses;Duplodnaviria;Heunggongvirae;Uroviricota;Caudoviricetes
S2_012_000_R2_scaffold_26_prodigal-single	huge_phage_5704	261870	Al-Shayeb.et.al.2020	NICU Room Metagenomes	Others	0.478539	Complete	High-quality	Yes	/	Yes	Viruses;Duplodnaviria;Heunggongvirae;Uroviricota;Caudoviricetes
PH2015_22_scaffold_1_prodigal-single	huge_phage_5947	218678	Al-Shayeb.et.al.2020	Environmental;Aquatic;Freshwater	Freshwater	0.421665	Medium-quality	Genome-fragment	Yes	/	Yes	Viruses;Duplodnaviria;Heunggongvirae;Uroviricota;Caudoviricetes
Salt_Pond_R2_restored_H2O_MG_scaffold_3_prodigal-single	huge_phage_5952	283971	Al-Shayeb.et.al.2020	Environmental;Aquatic;Non-marine Saline and Alkaline	Non-marine Saline and Alkaline	0.32972	Medium-quality	Genome-fragment	Yes	/	Yes	Viruses;Duplodnaviria;Heunggongvirae;Uroviricota;Caudoviricetes
PH2015_10_scaffold_0_prodigal-single	huge_phage_5991	244819	Al-Shayeb.et.al.2020	Environmental;Aquatic;Freshwater	Freshwater	0.478549	Complete	High-quality	Yes	/	Yes	Viruses;Duplodnaviria;Heunggongvirae;Uroviricota;Caudoviricetes
JSantini_GMIN_scaffold_8_prodigal-single	huge_phage_6011	343399	Al-Shayeb.et.al.2020	Giant Mine biofilm	Others	0.38033	Complete	High-quality	Yes	/	Yes	Viruses;Duplodnaviria;Heunggongvirae;Uroviricota;Caudoviricetes
LacPavin_0818_WC40_scaffold_269347_prodigal-single	huge_phage_6025	252800	Al-Shayeb.et.al.2020	Environmental;Aquatic;Freshwater	Freshwater	0.274597	Medium-quality	Genome-fragment	Yes	/	Yes	Viruses;Duplodnaviria;Heunggongvirae;Uroviricota;Caudoviricetes
BML_08042016_6_5m_scaffold_14_prodigal-single	huge_phage_6037	285956	Al-Shayeb.et.al.2020	Environmental;Aquatic;Freshwater	Freshwater	0.484434	Medium-quality	Genome-fragment	Yes	/	Yes	Viruses;Duplodnaviria;Heunggongvirae;Uroviricota;Caudoviricetes
sw_7_scaffold_1_prodigal-single	huge_phage_6059	322447	Al-Shayeb.et.al.2020	Amundson_desert	Others	0.460569	High-quality	High-quality	Yes	/	Yes	Viruses;Duplodnaviria;Heunggongvirae;Uroviricota;Caudoviricetes
QC4_scaffold_20_prodigal-single	huge_phage_6061	212663	Al-Shayeb.et.al.2020	Environmental;Aquatic;Thermal springs	Others	0.505772	Complete	High-quality	Yes	/	Yes	Viruses;Duplodnaviria;Heunggongvirae;Uroviricota;Caudoviricetes
term1_saliva_scaffold_3_curated_closed_complete_prodigal-single	huge_phage_6097	341471	Al-Shayeb.et.al.2020	Host-associated;Human;Digestive system	Animal digestive system	0.363893	High-quality	High-quality	Yes	/	Yes	Viruses;Duplodnaviria;Heunggongvirae;Uroviricota;Caudoviricetes
SR-VP_4-6_scaffold_141_2630357_prodigal-single	huge_phage_6184	426196	Al-Shayeb.et.al.2020	Environmental;Terrestrial;Soil	Soil	0.404145	High-quality	High-quality	Yes	/	Yes	Viruses;Duplodnaviria;Heunggongvirae;Uroviricota;Caudoviricetes
S2_009_000_R2_scaffold_26_prodigal-single	huge_phage_6199	316706	Al-Shayeb.et.al.2020	NICU Room Metagenomes	Others	0.434406	Complete	High-quality	Yes	/	Yes	Viruses;Duplodnaviria;Heunggongvirae;Uroviricota;Caudoviricetes
SRR1747055_scaffold_2_prodigal-single	huge_phage_6245	279625	Al-Shayeb.et.al.2020	Host-associated;Mammals;Digestive system	Animal digestive system	0.270959	Medium-quality	Genome-fragment	Yes	/	Yes	Viruses;Duplodnaviria;Heunggongvirae;Uroviricota;Caudoviricetes
Salt_Pond_R1_B_D2_MG_scaffold_4_prodigal-single	huge_phage_6290	332280	Al-Shayeb.et.al.2020	Environmental;Aquatic;Non-marine Saline and Alkaline	Non-marine Saline and Alkaline	0.4416	Medium-quality	Genome-fragment	Yes	/	Yes	Viruses;Duplodnaviria;Heunggongvirae;Uroviricota;Caudoviricetes
BML_coassembly_scaffold_35_prodigal-single	huge_phage_6333	331044	Al-Shayeb.et.al.2020	Environmental;Aquatic;Freshwater	Freshwater	0.335557	Medium-quality	Genome-fragment	Yes	/	Yes	Viruses;Duplodnaviria;Heunggongvirae;Uroviricota;Caudoviricetes
BML_08022017_6_5m_scaffold_3_prodigal-single	huge_phage_6338	325046	Al-Shayeb.et.al.2020	Environmental;Aquatic;Freshwater	Freshwater	0.311402	Complete	High-quality	Yes	/	Yes	Viruses;Duplodnaviria;Heunggongvirae;Uroviricota;Caudoviricetes
BML_08182015_6_5m_scaffold_7_prodigal-single	huge_phage_6344	237989	Al-Shayeb.et.al.2020	Environmental;Aquatic;Freshwater	Freshwater	0.354302	Complete	High-quality	Yes	/	Yes	Viruses;Duplodnaviria;Heunggongvirae;Uroviricota;Caudoviricetes
SR-VP_0-2_scaffold_141_316084_prodigal-single	huge_phage_6380	444958	Al-Shayeb.et.al.2020	Environmental;Terrestrial;Soil	Soil	0.519791	High-quality	High-quality	Yes	/	Yes	Viruses;Duplodnaviria;Heunggongvirae;Uroviricota;Caudoviricetes
FFC_09252017_16_scaffold_6_prodigal-single	huge_phage_6432	203881	Al-Shayeb.et.al.2020	Environmental;Aquatic;Freshwater	Freshwater	0.419004	Medium-quality	Genome-fragment	Yes	/	Yes	Viruses;Duplodnaviria;Heunggongvirae;Uroviricota;Caudoviricetes
PLM4_65_coex_sep16_scaffold_0_prodigal-single	huge_phage_6481	350418	Al-Shayeb.et.al.2020	East River Hillslope	Freshwater	0.490551	High-quality	High-quality	Yes	/	Yes	Viruses;Duplodnaviria;Heunggongvirae;Uroviricota;Caudoviricetes
LacPavin_0818_WC40_scaffold_30711_prodigal-single	huge_phage_6606	292000	Al-Shayeb.et.al.2020	Environmental;Aquatic;Freshwater	Freshwater	0.219774	Medium-quality	Genome-fragment	Yes	/	Yes	Viruses;Duplodnaviria;Heunggongvirae;Uroviricota;Caudoviricetes
LacPavin_0818_WC40_scaffold_193576_prodigal-single	huge_phage_6694	232799	Al-Shayeb.et.al.2020	Environmental;Aquatic;Freshwater	Freshwater	0.265981	Medium-quality	Genome-fragment	Yes	/	Yes	Viruses;Duplodnaviria;Heunggongvirae;Uroviricota;Caudoviricetes
S2_005_003_R2_scaffold_22_prodigal-single	huge_phage_6704	259229	Al-Shayeb.et.al.2020	NICU Room Metagenomes	Others	0.495134	Complete	High-quality	Yes	/	Yes	Viruses;Duplodnaviria;Heunggongvirae;Uroviricota;Caudoviricetes
SRR1747065_scaffold_5_prodigal-single	huge_phage_6782	234767	Al-Shayeb.et.al.2020	Host-associated;Mammals;Digestive system	Animal digestive system	0.35292	High-quality	High-quality	Yes	/	Yes	Viruses;Duplodnaviria;Heunggongvirae;Uroviricota;Caudoviricetes
S2_012_000_R2_scaffold_18_prodigal-single	huge_phage_6857	291133	Al-Shayeb.et.al.2020	NICU Room Metagenomes	Others	0.470266	Medium-quality	Genome-fragment	Yes	/	Yes	Viruses;Duplodnaviria;Heunggongvirae;Uroviricota;Caudoviricetes
P0_An_GD2017L_S7_coassembly_k141_2695417_prodigal-single	huge_phage_6937	329533	Al-Shayeb.et.al.2020	Environmental;Terrestrial;Deep subsurface	Deep subsurface	0.63573	Medium-quality	Genome-fragment	Yes	/	Yes	Viruses;Duplodnaviria;Heunggongvirae;Uroviricota;Caudoviricetes
NODE_14_length_293356_cov_397-335986_prodigal-single	huge_phage_7112	293356	Al-Shayeb.et.al.2020	Human gut	Animal digestive system	0.337823	Medium-quality	Genome-fragment	Yes	/	Yes	Viruses;Duplodnaviria;Heunggongvirae;Uroviricota;Caudoviricetes
rifcsphigho2_12_scaffold_16_prodigal-single	huge_phage_7124	361263	Al-Shayeb.et.al.2020	Environmental;Terrestrial;Deep subsurface	Deep subsurface	0.353468	Complete	High-quality	Yes	/	Yes	Viruses;Duplodnaviria;Heunggongvirae;Uroviricota;Caudoviricetes
SR-VP_0-2_scaffold_141_5191495_prodigal-single	huge_phage_7174	214804	Al-Shayeb.et.al.2020	Environmental;Terrestrial;Soil	Soil	0.378163	High-quality	High-quality	Yes	/	Yes	Viruses;Duplodnaviria;Heunggongvirae;Uroviricota;Caudoviricetes
ERMGT119_2_scaffold_6_prodigal-single	huge_phage_7210	213193	Al-Shayeb.et.al.2020	East river	Freshwater	0.363244	Complete	High-quality	Yes	/	Yes	Viruses;Duplodnaviria;Heunggongvirae;Uroviricota;Caudoviricetes
SR-VP_0-2_scaffold_141_2510002_prodigal-single	huge_phage_7247	354149	Al-Shayeb.et.al.2020	Environmental;Terrestrial;Soil	Soil	0.483003	High-quality	High-quality	Yes	/	Yes	Viruses;Duplodnaviria;Heunggongvirae;Uroviricota;Caudoviricetes
LacPavin_0818_WC40_scaffold_354720_prodigal-single	huge_phage_7261	378298	Al-Shayeb.et.al.2020	Environmental;Aquatic;Freshwater	Freshwater	0.389458	High-quality	High-quality	Yes	/	Yes	Viruses;Duplodnaviria;Heunggongvirae;Uroviricota;Caudoviricetes
SR-VP_4-6_scaffold_141_4086954_prodigal-single	huge_phage_7296	291182	Al-Shayeb.et.al.2020	Environmental;Terrestrial;Soil	Soil	0.297457	Medium-quality	Genome-fragment	Yes	/	Yes	Viruses;Duplodnaviria;Heunggongvirae;Uroviricota;Caudoviricetes
Mad1_20_16_scaffold_0_curated_closed_complete_start-adj_prodigal-single	huge_phage_7310	636363	Al-Shayeb.et.al.2020	Rivendell Hillslope	Groundwater	0.263934	High-quality	High-quality	Yes	/	Yes	Viruses;Duplodnaviria;Heunggongvirae;Uroviricota;Caudoviricetes
Salt_Pond_R2_restored_H2O_MG_scaffold_1_prodigal-single	huge_phage_7332	331644	Al-Shayeb.et.al.2020	Environmental;Aquatic;Non-marine Saline and Alkaline	Non-marine Saline and Alkaline	0.378493	High-quality	High-quality	Yes	/	Yes	Viruses;Duplodnaviria;Heunggongvirae;Uroviricota;Caudoviricetes
rifoxyd1_full_scaffold_5_prodigal-single	huge_phage_7401	341069	Al-Shayeb.et.al.2020	Environmental;Terrestrial;Deep subsurface	Deep subsurface	0.468993	Medium-quality	Genome-fragment	Yes	/	Yes	Viruses;Duplodnaviria;Heunggongvirae;Uroviricota;Caudoviricetes
SRR1747018_scaffold_15_prodigal-single	huge_phage_7448	396413	Al-Shayeb.et.al.2020	Host-associated;Mammals;Digestive system	Animal digestive system	0.319279	High-quality	High-quality	Yes	/	Yes	Viruses;Duplodnaviria;Heunggongvirae;Uroviricota;Caudoviricetes
S_p1_S3_coassembly_k141_2031891_prodigal-single	huge_phage_7604	208343	Al-Shayeb.et.al.2020	Groundwater	Groundwater	0.595734	Complete	High-quality	Yes	/	Yes	Viruses;Duplodnaviria;Heunggongvirae;Uroviricota;Caudoviricetes
BML_08182015_1_5m_scaffold_1_prodigal-single	huge_phage_7667	346168	Al-Shayeb.et.al.2020	Environmental;Aquatic;Freshwater	Freshwater	0.401123	Complete	High-quality	Yes	/	Yes	Viruses;Duplodnaviria;Heunggongvirae;Uroviricota;Caudoviricetes
RTP_09252017_15_scaffold_29_prodigal-single	huge_phage_7712	338752	Al-Shayeb.et.al.2020	Environmental;Aquatic;Freshwater	Freshwater	0.33294	High-quality	High-quality	Yes	/	Yes	Viruses;Duplodnaviria;Heunggongvirae;Uroviricota;Caudoviricetes
SR-VP_0-2_scaffold_141_4953755_prodigal-single	huge_phage_7751	210022	Al-Shayeb.et.al.2020	Environmental;Terrestrial;Soil	Soil	0.430693	High-quality	High-quality	Yes	/	Yes	Viruses;Duplodnaviria;Heunggongvirae;Uroviricota;Caudoviricetes
LacPavin_0818_WC40_scaffold_75050_prodigal-single	huge_phage_7760	237691	Al-Shayeb.et.al.2020	Environmental;Aquatic;Freshwater	Freshwater	0.310744	Medium-quality	Genome-fragment	Yes	/	Yes	Viruses;Duplodnaviria;Heunggongvirae;Uroviricota;Caudoviricetes
gwf1_scaffold_41_prodigal-single	huge_phage_7785	292100	Al-Shayeb.et.al.2020	Environmental;Terrestrial;Deep subsurface	Deep subsurface	0.259784	High-quality	High-quality	Yes	/	Yes	Viruses;Duplodnaviria;Heunggongvirae;Uroviricota;Caudoviricetes
pig_ID_3640_F65_scaffold_23_curated_prodigal-single	huge_phage_7834	267678	Al-Shayeb.et.al.2020	Host-associated;Mammals;Digestive system	Animal digestive system	0.253491	High-quality	High-quality	Yes	/	Yes	Viruses;Duplodnaviria;Heunggongvirae;Uroviricota;Caudoviricetes
S16_GE16_scaffold_5545_prodigal-single	huge_phage_7858	277104	Al-Shayeb.et.al.2020	Groundwater	Groundwater	0.464317	High-quality	High-quality	Yes	/	Yes	Viruses;Duplodnaviria;Heunggongvirae;Uroviricota;Caudoviricetes
pig_ID_2856_F42_S57_scaffold_0_curated_prodigal-single	huge_phage_7866	250325	Al-Shayeb.et.al.2020	Host-associated;Mammals;Digestive system	Animal digestive system	0.367971	High-quality	High-quality	Yes	/	Yes	Viruses;Duplodnaviria;Heunggongvirae;Uroviricota;Caudoviricetes
BML_08042016_6_5m_scaffold_1_prodigal-single	huge_phage_7921	332132	Al-Shayeb.et.al.2020	Environmental;Aquatic;Freshwater	Freshwater	0.470795	Complete	High-quality	Yes	/	Yes	Viruses;Duplodnaviria;Heunggongvirae;Uroviricota;Caudoviricetes
BML_08042016_1_5m_scaffold_1_curated_closed_gap_prodigal-single	huge_phage_7988	331640	Al-Shayeb.et.al.2020	Environmental;Aquatic;Freshwater	Freshwater	0.510195	Medium-quality	Genome-fragment	Yes	/	Yes	Viruses;Duplodnaviria;Heunggongvirae;Uroviricota;Caudoviricetes
BC_09192017_0_5m_scaffold_0_prodigal-single	huge_phage_8031	296039	Al-Shayeb.et.al.2020	Environmental;Aquatic;Freshwater	Freshwater	0.30496	High-quality	High-quality	Yes	/	Yes	Viruses;Duplodnaviria;Heunggongvirae;Uroviricota;Caudoviricetes
SR-VP_2-4_scaffold_141_1208361_prodigal-single	huge_phage_8044	462167	Al-Shayeb.et.al.2020	Environmental;Terrestrial;Soil	Soil	0.346935	Complete	High-quality	Yes	/	Yes	Viruses;Duplodnaviria;Heunggongvirae;Uroviricota;Caudoviricetes
SR-VP_0-2_scaffold_141_4556078_prodigal-single	huge_phage_8091	275744	Al-Shayeb.et.al.2020	Environmental;Terrestrial;Soil	Soil	0.502256	High-quality	High-quality	Yes	/	Yes	Viruses;Duplodnaviria;Heunggongvirae;Uroviricota;Caudoviricetes
SR-VP_4-6_scaffold_141_2201553_prodigal-single	huge_phage_8144	296433	Al-Shayeb.et.al.2020	Environmental;Terrestrial;Soil	Soil	0.639817	Medium-quality	Genome-fragment	Yes	/	Yes	Viruses;Duplodnaviria;Heunggongvirae;Uroviricota;Caudoviricetes
SRR1747052_scaffold_27_prodigal-single	huge_phage_8148	241201	Al-Shayeb.et.al.2020	Host-associated;Mammals;Digestive system	Animal digestive system	0.347532	Complete	High-quality	Yes	/	Yes	Viruses;Duplodnaviria;Heunggongvirae;Uroviricota;Caudoviricetes
JBCH_GD18_scaffold_652796_prodigal-single	huge_phage_8160	233331	Al-Shayeb.et.al.2020	Groundwater	Groundwater	0.632689	Complete	High-quality	Yes	/	Yes	Viruses;Duplodnaviria;Heunggongvirae;Uroviricota;Caudoviricetes
LacPavin_0818_WC40_scaffold_238879_prodigal-single	huge_phage_8234	399135	Al-Shayeb.et.al.2020	sewage	Freshwater	0.37552	High-quality	High-quality	Yes	/	Yes	Viruses;Duplodnaviria;Heunggongvirae;Uroviricota;Caudoviricetes
term6_stool_scaffold_5_prodigal-single	huge_phage_8362	224755	Al-Shayeb.et.al.2020	Environmental;Aquatic;Freshwater	Freshwater	0.271111	Medium-quality	Genome-fragment	Yes	/	Yes	Viruses;Duplodnaviria;Heunggongvirae;Uroviricota;Caudoviricetes
PH2015_20_sub10_scaffold_1_prodigal-single	huge_phage_8365	320009	Al-Shayeb.et.al.2020	Environmental;Aquatic;Freshwater	Freshwater	0.382308	Medium-quality	Genome-fragment	Yes	/	Yes	Viruses;Duplodnaviria;Heunggongvirae;Uroviricota;Caudoviricetes
rifcsphigho2-12_scaffold_combined_curated_prodigal-single	huge_phage_8418	219275	Al-Shayeb.et.al.2020	Environmental;Terrestrial;Deep subsurface	Deep subsurface	0.329177	High-quality	High-quality	Yes	/	Yes	Viruses;Duplodnaviria;Heunggongvirae;Uroviricota;Caudoviricetes
FFC_09252017_16_scaffold_13_prodigal-single	huge_phage_8595	220400	Al-Shayeb.et.al.2020	Environmental;Aquatic;Freshwater	Freshwater	0.431629	Medium-quality	Genome-fragment	Yes	/	Yes	Viruses;Duplodnaviria;Heunggongvirae;Uroviricota;Caudoviricetes
FFSP_09252017_12_scaffold_64_prodigal-single	huge_phage_8660	262413	Al-Shayeb.et.al.2020	Environmental;Aquatic;Freshwater	Freshwater	0.3373	High-quality	High-quality	Yes	/	Yes	Viruses;Duplodnaviria;Heunggongvirae;Uroviricota;Caudoviricetes
H2c1_full_idba_ud_scaffold_88_prodigal-single	huge_phage_8684	404268	Al-Shayeb.et.al.2020	East river	Freshwater	0.581243	Medium-quality	Genome-fragment	Yes	/	Yes	Viruses;Duplodnaviria;Heunggongvirae;Uroviricota;Caudoviricetes
DGJ7_scaffold_2_2069_prodigal-single	huge_phage_8763	325850	Al-Shayeb.et.al.2020	Environmental;Aquatic;Thermal springs	Others	0.425948	High-quality	High-quality	Yes	/	Yes	Viruses;Duplodnaviria;Heunggongvirae;Uroviricota;Caudoviricetes
SR-VP_4-6_scaffold_141_476970_prodigal-single	huge_phage_8799	369613	Al-Shayeb.et.al.2020	Environmental;Terrestrial;Soil	Soil	0.488589	Complete	High-quality	Yes	/	Yes	Viruses;Duplodnaviria;Heunggongvirae;Uroviricota;Caudoviricetes
ALT_09252017_20_scaffold_146_prodigal-single	huge_phage_8833	209089	Al-Shayeb.et.al.2020	Environmental;Aquatic;Freshwater	Freshwater	0.396157	Medium-quality	Genome-fragment	Yes	/	Yes	Viruses;Duplodnaviria;Heunggongvirae;Uroviricota;Caudoviricetes
S2_012_000_R2_scaffold_20_prodigal-single	huge_phage_8869	283806	Al-Shayeb.et.al.2020	NICU Room Metagenomes	Others	0.455977	Medium-quality	Genome-fragment	Yes	/	Yes	Viruses;Duplodnaviria;Heunggongvirae;Uroviricota;Caudoviricetes
SRR1747044_scaffold_0_prodigal-single	huge_phage_8879	295461	Al-Shayeb.et.al.2020	Host-associated;Mammals;Digestive system	Animal digestive system	0.382423	Complete	High-quality	Yes	/	Yes	Viruses;Duplodnaviria;Heunggongvirae;Uroviricota;Caudoviricetes
S2_005_003_R2_scaffold_7_prodigal-single	huge_phage_8912	423438	Al-Shayeb.et.al.2020	NICU Room Metagenomes	Others	0.464082	Complete	High-quality	Yes	/	Yes	Viruses;Duplodnaviria;Heunggongvirae;Uroviricota;Caudoviricetes
BML_08182015_6_5m_scaffold_1_prodigal-single_1	huge_phage_1196	330530	Al-Shayeb.et.al.2020	Environmental;Aquatic;Freshwater	Freshwater	0.402088	Medium-quality	Genome-fragment	Yes	/	No	/
pre4_saliva_scaffold_3_prodigal-single_1	huge_phage_1293	227972	Al-Shayeb.et.al.2020	Host-associated;Human;Digestive system	Animal digestive system	0.30988	High-quality	High-quality	Yes	/	No	/
GWB1_scaffold_3_prodigal-single_1	huge_phage_1297	313598	Al-Shayeb.et.al.2020	Environmental;Terrestrial;Deep subsurface	Deep subsurface	0.420758	Medium-quality	Genome-fragment	Yes	/	No	/
gwf1_scaffold_9_prodigal-single_1	huge_phage_1336	213485	Al-Shayeb.et.al.2020	Environmental;Terrestrial;Deep subsurface	Deep subsurface	0.396159	High-quality	High-quality	Yes	/	No	/
BML_08042016_1_5m_scaffold_0_curated_closed_complete_prodigal-single_1	huge_phage_1341	330264	Al-Shayeb.et.al.2020	Environmental;Aquatic;Freshwater	Freshwater	0.47043	Medium-quality	Genome-fragment	No	/	No	/
rifoxyc1_full_scaffold_27_prodigal-single_1	huge_phage_1362	262149	Al-Shayeb.et.al.2020	Environmental;Terrestrial;Deep subsurface	Deep subsurface	0.289236	High-quality	High-quality	Yes	/	No	/
gwa1_scaffold_1_prodigal-single_1	huge_phage_1367	313598	Al-Shayeb.et.al.2020	Environmental;Terrestrial;Deep subsurface	Deep subsurface	0.420758	Medium-quality	Genome-fragment	No	/	No	/
gwc1_scaffold_4_prodigal-single_1	huge_phage_1416	313598	Al-Shayeb.et.al.2020	Environmental;Terrestrial;Deep subsurface	Deep subsurface	0.420762	Medium-quality	Genome-fragment	No	/	No	/
JGI24723J26617_10000007_prodigal-single	huge_phage_1578	347087	Al-Shayeb.et.al.2020	Unknown	Unknown	0.400456	Medium-quality	Genome-fragment	Yes	/	No	/
BML_08182015_1_5m_scaffold_5_prodigal-single	huge_phage_1606	225546	Al-Shayeb.et.al.2020	Environmental;Aquatic;Freshwater	Freshwater	0.39165	Medium-quality	Genome-fragment	Yes	/	No	/
aot2015-SM37_SRR1761715_Peru_trim_clean_trim_clean_scaffold_2_curated_closed_complete_prodigal-single	huge_phage_1641	203260	Al-Shayeb.et.al.2020	Human gut	Animal digestive system	0.348883	Medium-quality	Genome-fragment	Yes	/	No	/
S19_GE19_scaffold_251993_prodigal-single	huge_phage_2054	437772	Al-Shayeb.et.al.2020	Groundwater	Groundwater	0.346847	Complete	High-quality	No	/	No	/
SRR1747021_scaffold_4_curated_closed_complete_prodigal-single	huge_phage_2079	259781	Al-Shayeb.et.al.2020	Host-associated;Mammals;Digestive system	Animal digestive system	0.328384	High-quality	High-quality	No	/	No	/
gwa1_scaffold_0_prodigal-single	huge_phage_2138	332631	Al-Shayeb.et.al.2020	Environmental;Terrestrial;Deep subsurface	Deep subsurface	0.381426	Complete	High-quality	No	/	No	/
SR-VP_0-2_scaffold_141_4939684_prodigal-single	huge_phage_2179	227239	Al-Shayeb.et.al.2020	Environmental;Terrestrial;Soil	Soil	0.482448	Medium-quality	Genome-fragment	Yes	/	No	/
rifoxyc1_full_scaffold_3_prodigal-single	huge_phage_2204	294112	Al-Shayeb.et.al.2020	Environmental;Terrestrial;Deep subsurface	Deep subsurface	0.341635	High-quality	High-quality	Yes	/	No	/
S2_009_000_R2_scaffold_143_prodigal-single	huge_phage_2226	261787	Al-Shayeb.et.al.2020	NICU Room Metagenomes	Others	0.478507	Complete	High-quality	Yes	/	No	/
GWB1_scaffold_1_prodigal-single	huge_phage_2229	332697	Al-Shayeb.et.al.2020	Environmental;Terrestrial;Deep subsurface	Deep subsurface	0.381419	Complete	High-quality	No	/	No	/
SRR1747022_scaffold_22_prodigal-single	huge_phage_2230	231390	Al-Shayeb.et.al.2020	Host-associated;Mammals;Digestive system	Animal digestive system	0.367769	High-quality	High-quality	Yes	/	No	/
PPR_Contig_984988_prodigal-single	huge_phage_2284	223498	Al-Shayeb.et.al.2020	Unknown	Unknown	0.362008	Medium-quality	Genome-fragment	Yes	/	No	/
BML_08012017_9_75m_scaffold_2_prodigal-single	huge_phage_2289	324002	Al-Shayeb.et.al.2020	Environmental;Aquatic;Freshwater	Freshwater	0.311047	High-quality	High-quality	Yes	/	No	/
gwc1_scaffold_8_prodigal-single	huge_phage_2355	210922	Al-Shayeb.et.al.2020	Environmental;Terrestrial;Deep subsurface	Deep subsurface	0.338182	Complete	High-quality	No	/	No	/
LacPavin_0818_WC40_scaffold_575784_prodigal-single	huge_phage_2365	369064	Al-Shayeb.et.al.2020	Environmental;Aquatic;Freshwater	Freshwater	0.521839	Medium-quality	Genome-fragment	Yes	/	No	/
PHAGE-A9--js4906-26-5_S28_scaffold_5_curated_closed_complete_prodigal-single	huge_phage_2370	236936	Al-Shayeb.et.al.2020	Host-associated;Mammals;Digestive system	Animal digestive system	0.386632	High-quality	High-quality	No	/	No	/
term2_saliva_scaffold_1_prodigal-single	huge_phage_2464	255730	Al-Shayeb.et.al.2020	Host-associated;Human;Digestive system	Animal digestive system	0.350272	Complete	High-quality	Yes	/	No	/
SR-VP_0-2_scaffold_141_6586340_prodigal-single	huge_phage_2471	245752	Al-Shayeb.et.al.2020	Environmental;Terrestrial;Soil	Soil	0.328775	High-quality	High-quality	Yes	/	No	/
SRR1747059_scaffold_0_curated_closed_complete_reversed_prodigal-single	huge_phage_2493	263352	Al-Shayeb.et.al.2020	Host-associated;Mammals;Digestive system	Animal digestive system	0.312771	High-quality	High-quality	No	/	No	/
gwd1_scaffold_1_prodigal-single	huge_phage_2598	332697	Al-Shayeb.et.al.2020	Environmental;Terrestrial;Deep subsurface	Deep subsurface	0.381392	Complete	High-quality	No	/	No	/
pig_ID_3158_F95_scaffold_0_curated_closed_complete_prodigal-single	huge_phage_2617	237515	Al-Shayeb.et.al.2020	Host-associated;Mammals;Digestive system	Animal digestive system	0.365233	Medium-quality	Genome-fragment	No	/	No	/
PH2017_26_ELK_O_A_scaffold_10_prodigal-single	huge_phage_2762	332148	Al-Shayeb.et.al.2020	Environmental;Aquatic;Freshwater	Freshwater	0.430748	Complete	High-quality	Yes	/	No	/
SRR1747046_scaffold_29_prodigal-single	huge_phage_2871	226292	Al-Shayeb.et.al.2020	Host-associated;Mammals;Digestive system	Animal digestive system	0.344241	High-quality	High-quality	Yes	/	No	/
SR-VP_0-2_scaffold_141_4750547_curated_closed_complete_prodigal-single	huge_phage_2894	595163	Al-Shayeb.et.al.2020	Environmental;Terrestrial;Soil	Soil	0.421102	High-quality	High-quality	No	/	No	/
S2_GD2017_2_manure_scaffold_3_prodigal-single	huge_phage_2911	401381	Al-Shayeb.et.al.2020	Groundwater	Groundwater	0.479744	Complete	High-quality	Yes	/	No	/
SRR1747025_scaffold_38_prodigal-single	huge_phage_2986	221096	Al-Shayeb.et.al.2020	Host-associated;Mammals;Digestive system	Animal digestive system	0.295587	Medium-quality	Genome-fragment	Yes	/	No	/
SRR1747018_scaffold_3_prodigal-single	huge_phage_3047	261892	Al-Shayeb.et.al.2020	Host-associated;Mammals;Digestive system	Animal digestive system	0.312858	High-quality	High-quality	Yes	/	No	/
pig_ID_3489_F71_scaffold_0_curated_closed_complete_prodigal-single	huge_phage_3095	247421	Al-Shayeb.et.al.2020	Host-associated;Mammals;Digestive system	Animal digestive system	0.368485	High-quality	High-quality	No	/	No	/
BML_coassembly_scaffold_41_prodigal-single	huge_phage_3283	226908	Al-Shayeb.et.al.2020	Environmental;Aquatic;Freshwater	Freshwater	0.464796	Medium-quality	Genome-fragment	Yes	/	No	/
CG_2015-01t_scaffold_2_prodigal-single	huge_phage_3301	236277	Al-Shayeb.et.al.2020	Environmental;Terrestrial;Deep subsurface	Deep subsurface	0.373909	High-quality	High-quality	Yes	/	No	/
scnpilot_solids1_trim150_scaffold_46_prodigal-single	huge_phage_3306	227441	Al-Shayeb.et.al.2020	Engineered;Biotransformation;Bioreactor	Bioreactor	0.523872	Medium-quality	Genome-fragment	Yes	/	No	/
LacPavin_0818_WC45_scaffold_125832_prodigal-single	huge_phage_3386	358628	Al-Shayeb.et.al.2020	Environmental;Aquatic;Freshwater	Freshwater	0.521359	Medium-quality	Genome-fragment	Yes	/	No	/
BML_08182015_1_5m_scaffold_9_prodigal-single	huge_phage_3390	237794	Al-Shayeb.et.al.2020	Environmental;Aquatic;Freshwater	Freshwater	0.354353	High-quality	High-quality	Yes	/	No	/
BML_08182015_8_5m_scaffold_0_prodigal-single	huge_phage_3458	230743	Al-Shayeb.et.al.2020	Environmental;Aquatic;Freshwater	Freshwater	0.392255	Medium-quality	Genome-fragment	Yes	/	No	/
pig_ID_2419_F67_scaffold_3_curated_closed_complete_prodigal-single	huge_phage_3461	227103	Al-Shayeb.et.al.2020	Host-associated;Mammals;Digestive system	Animal digestive system	0.311533	High-quality	High-quality	No	/	No	/
LacPavin_0818_WC45_scaffold_4_curated_closed_complete_start-adj_prodigal-single	huge_phage_3732	735411	Al-Shayeb.et.al.2020	Environmental;Aquatic;Freshwater	Freshwater	0.322254	High-quality	High-quality	No	/	No	/
SRR1747020_scaffold_5_prodigal-single	huge_phage_3804	202495	Al-Shayeb.et.al.2020	Host-associated;Mammals;Digestive system	Animal digestive system	0.313869	Medium-quality	Genome-fragment	Yes	/	No	/
SR-VP_4-6_scaffold_141_4176636_prodigal-single	huge_phage_3963	213672	Al-Shayeb.et.al.2020	Environmental;Terrestrial;Soil	Soil	0.331045	Medium-quality	Genome-fragment	Yes	/	No	/
SRR1747045_scaffold_1_prodigal-single	huge_phage_4013	203921	Al-Shayeb.et.al.2020	Host-associated;Mammals;Digestive system	Animal digestive system	0.318133	Medium-quality	Genome-fragment	Yes	/	No	/
PLM4_65_b1_redo_sep16_scaffold_0_prodigal-single	huge_phage_4017	298824	Al-Shayeb.et.al.2020	East River Hillslope	Freshwater	0.485583	Medium-quality	Genome-fragment	Yes	/	No	/
SRR1747064_scaffold_2_prodigal-single	huge_phage_4061	313409	Al-Shayeb.et.al.2020	Host-associated;Mammals;Digestive system	Animal digestive system	0.321462	Complete	High-quality	Yes	/	No	/
Salt_Pond_R1_A_D2_MG_scaffold_10_prodigal-single	huge_phage_4085	291615	Al-Shayeb.et.al.2020	Environmental;Aquatic;Non-marine Saline and Alkaline	Non-marine Saline and Alkaline	0.439473	Medium-quality	Genome-fragment	Yes	/	No	/
SR-VP_0-2_scaffold_141_2071242_prodigal-single	huge_phage_4174	465583	Al-Shayeb.et.al.2020	Environmental;Terrestrial;Soil	Soil	0.628831	Complete	High-quality	No	/	No	/
SCNpilot_solid_1_scaffold_45_prodigal-single	huge_phage_4179	208733	Al-Shayeb.et.al.2020	Engineered;Biotransformation;Bioreactor	Bioreactor	0.523971	Medium-quality	Genome-fragment	Yes	/	No	/
gwa1_scaffold_31_prodigal-single	huge_phage_4224	210832	Al-Shayeb.et.al.2020	Environmental;Terrestrial;Deep subsurface	Deep subsurface	0.338179	Complete	High-quality	Yes	/	No	/
Filtrate_w_scaffold_4_prodigal-single	huge_phage_4278	229126	Al-Shayeb.et.al.2020	Unknown	Unknown	0.372708	High-quality	High-quality	No	/	No	/
S2_018_000_R2_scaffold_9_prodigal-single	huge_phage_4379	389450	Al-Shayeb.et.al.2020	NICU Room Metagenomes	Others	0.493827	Medium-quality	Genome-fragment	Yes	/	No	/
GWB1_scaffold_11_prodigal-single	huge_phage_4441	210888	Al-Shayeb.et.al.2020	Environmental;Terrestrial;Deep subsurface	Deep subsurface	0.338132	Complete	High-quality	Yes	/	No	/
S16_GE16_scaffold_55267_prodigal-single	huge_phage_4508	437772	Al-Shayeb.et.al.2020	Groundwater	Groundwater	0.346859	Complete	High-quality	No	/	No	/
LacPavin_0818_WC45_scaffold_160996_curated_closed_complete_prodigal-single	huge_phage_4530	642428	Al-Shayeb.et.al.2020	Environmental;Aquatic;Freshwater	Freshwater	0.314722	High-quality	High-quality	No	/	No	/
term6_saliva_scaffold_1_curated_closed_complete_start-adj_prodigal-single	huge_phage_4533	282342	Al-Shayeb.et.al.2020	Host-associated;Human;Digestive system	Animal digestive system	0.311523	High-quality	High-quality	No	/	No	/
SCNpilot_BF_INOC_scaffold_63_prodigal-single	huge_phage_4796	338022	Al-Shayeb.et.al.2020	Engineered;Biotransformation;Bioreactor	Bioreactor	0.410064	High-quality	High-quality	Yes	/	No	/
Ig8144_scaffold_2_curated_closed_complete_start-adj_prodigal-single	huge_phage_4814	634780	Al-Shayeb.et.al.2020	Human Metagenome	Animal digestive system	0.291811	High-quality	High-quality	No	/	No	/
gwf1_scaffold_7_prodigal-single	huge_phage_4876	244049	Al-Shayeb.et.al.2020	Environmental;Terrestrial;Deep subsurface	Deep subsurface	0.373921	Complete	High-quality	No	/	No	/
LD_Run2_13_scaffold_0_prodigal-single	huge_phage_4888	293853	Al-Shayeb.et.al.2020	Human gut	Animal digestive system	0.31041	High-quality	High-quality	Yes	/	No	/
SRR1747018_scaffold_13_prodigal-single	huge_phage_4900	209946	Al-Shayeb.et.al.2020	Host-associated;Mammals;Digestive system	Animal digestive system	0.3346	Complete	High-quality	Yes	/	No	/
SR-VP_4-6_scaffold_141_283859_prodigal-single	huge_phage_4973	354326	Al-Shayeb.et.al.2020	Environmental;Terrestrial;Soil	Soil	0.521252	Medium-quality	Genome-fragment	Yes	/	No	/
SRR1747026_scaffold_22_prodigal-single	huge_phage_4982	229459	Al-Shayeb.et.al.2020	Host-associated;Mammals;Digestive system	Animal digestive system	0.366122	Medium-quality	Genome-fragment	Yes	/	No	/
scnpilot_solids2_trim150_scaffold_59_prodigal-single	huge_phage_4995	250751	Al-Shayeb.et.al.2020	Engineered;Biotransformation;Bioreactor	Bioreactor	0.524766	Medium-quality	Genome-fragment	Yes	/	No	/
CG_2015-01t_scaffold_40_prodigal-single	huge_phage_5003	355736	Al-Shayeb.et.al.2020	Environmental;Terrestrial;Deep subsurface	Deep subsurface	0.587509	High-quality	High-quality	Yes	/	No	/
LacPavin_0818_WC55_scaffold_0-10091_curated_closed_complete_start-adj_prodigal-single	huge_phage_5047	735411	Al-Shayeb.et.al.2020	Environmental;Aquatic;Freshwater	Freshwater	0.322251	High-quality	High-quality	No	/	No	/
rifoxya1_full_scaffold_1_prodigal-single	huge_phage_5075	264917	Al-Shayeb.et.al.2020	Environmental;Terrestrial;Deep subsurface	Deep subsurface	0.289008	Complete	High-quality	No	/	No	/
S2_006_000_R2_scaffold_7_prodigal-single	huge_phage_5131	468850	Al-Shayeb.et.al.2020	NICU Room Metagenomes	Others	0.456176	High-quality	High-quality	Yes	/	No	/
H18_Tanzania_scaffold_0_prodigal-single	huge_phage_5136	216408	Al-Shayeb.et.al.2020	Host-associated;Human;Digestive system	Animal digestive system	0.331309	High-quality	High-quality	No	/	No	/
PHAGE-A10--js4906-27-5_S32_scaffold_40_curated_closed_complete_prodigal-single	huge_phage_5171	255082	Al-Shayeb.et.al.2020	Host-associated;Mammals;Digestive system	Animal digestive system	0.294807	High-quality	High-quality	No	/	No	/
SRR1747056_scaffold_0_curated_closed_gap_prodigal-single	huge_phage_5189	208824	Al-Shayeb.et.al.2020	Host-associated;Mammals;Digestive system	Animal digestive system	0.244991	High-quality	High-quality	Yes	/	No	/
gwc2_scaffold_8_prodigal-single	huge_phage_5235	332697	Al-Shayeb.et.al.2020	Environmental;Terrestrial;Deep subsurface	Deep subsurface	0.381401	Complete	High-quality	No	/	No	/
SRR1747022_scaffold_18_curated_closed_gap_prodigal-single	huge_phage_5265	263310	Al-Shayeb.et.al.2020	Host-associated;Mammals;Digestive system	Animal digestive system	0.31275	High-quality	High-quality	Yes	/	No	/
gwf2_scaffold_93_prodigal-single	huge_phage_5288	225138	Al-Shayeb.et.al.2020	Environmental;Terrestrial;Deep subsurface	Deep subsurface	0.395966	Complete	High-quality	Yes	/	No	/
PHAGE-A4--js4906-25-3_S22_scaffold_24_curated_closed_complete_prodigal-single	huge_phage_5319	356281	Al-Shayeb.et.al.2020	Host-associated;Mammals;Digestive system	Animal digestive system	0.338985	High-quality	High-quality	No	/	No	/
Salt_Pond_R2_restored_H2O_MG_scaffold_5_prodigal-single	huge_phage_5389	201039	Al-Shayeb.et.al.2020	Environmental;Aquatic;Non-marine Saline and Alkaline	Non-marine Saline and Alkaline	0.409015	Complete	High-quality	No	/	No	/
ENA-CEUD01013717-CEUD01013717-1_prodigal-single	huge_phage_5422	310536	Al-Shayeb.et.al.2020	Unassigned	Marine	0.436413	Medium-quality	Genome-fragment	Yes	/	No	/
gwe2_scaffold_24_prodigal-single	huge_phage_5451	244049	Al-Shayeb.et.al.2020	Environmental;Terrestrial;Deep subsurface	Deep subsurface	0.373904	Complete	High-quality	No	/	No	/
SR-VP_0-2_scaffold_141_4753700_prodigal-single	huge_phage_5482	374858	Al-Shayeb.et.al.2020	Environmental;Terrestrial;Soil	Soil	0.394099	High-quality	High-quality	Yes	/	No	/
BML_08022017_1_5m_scaffold_2_prodigal-single	huge_phage_5586	324848	Al-Shayeb.et.al.2020	Environmental;Aquatic;Freshwater	Freshwater	0.311309	Complete	High-quality	Yes	/	No	/
BML_08182015_1_5m_scaffold_15_prodigal-single	huge_phage_5588	331260	Al-Shayeb.et.al.2020	Environmental;Aquatic;Freshwater	Freshwater	0.470685	Medium-quality	Genome-fragment	Yes	/	No	/
gwe1_scaffold_7_prodigal-single	huge_phage_5660	244049	Al-Shayeb.et.al.2020	Environmental;Terrestrial;Deep subsurface	Deep subsurface	0.373904	Complete	High-quality	No	/	No	/
pre1_saliva_scaffold_3_prodigal-single	huge_phage_5701	243652	Al-Shayeb.et.al.2020	Host-associated;Human;Digestive system	Animal digestive system	0.340412	High-quality	High-quality	Yes	/	No	/
P0_An_GD2017L_S7_coassembly_k141_1013362_prodigal-single	huge_phage_5726	288072	Al-Shayeb.et.al.2020	Environmental;Terrestrial;Deep subsurface	Deep subsurface	0.48123	High-quality	High-quality	Yes	/	No	/
GWB1_scaffold_combined_curated_closed_complete_prodigal-single	huge_phage_5741	462018	Al-Shayeb.et.al.2020	Environmental;Terrestrial;Deep subsurface	Deep subsurface	0.243261	High-quality	High-quality	No	/	No	/
BML_09012016_9m_scaffold_2_prodigal-single	huge_phage_5745	206479	Al-Shayeb.et.al.2020	Environmental;Aquatic;Freshwater	Freshwater	0.567041	Complete	High-quality	No	/	No	/
PH2015_19_scaffold_1_prodigal-single	huge_phage_5788	305387	Al-Shayeb.et.al.2020	Environmental;Aquatic;Freshwater	Freshwater	0.342952	Complete	High-quality	No	/	No	/
gwf2_scaffold_32_prodigal-single	huge_phage_5812	244049	Al-Shayeb.et.al.2020	Environmental;Terrestrial;Deep subsurface	Deep subsurface	0.373933	Complete	High-quality	No	/	No	/
BML_08182015_1_5m_scaffold_4_prodigal-single	huge_phage_5949	238004	Al-Shayeb.et.al.2020	Environmental;Aquatic;Freshwater	Freshwater	0.319911	High-quality	High-quality	Yes	/	No	/
pig_ID_445_F78_scaffold_208_curated_prodigal-single	huge_phage_5956	225229	Al-Shayeb.et.al.2020	Host-associated;Mammals;Digestive system	Animal digestive system	0.312376	High-quality	High-quality	Yes	/	No	/
Filtrate_w_scaffold_6_prodigal-single	huge_phage_5973	206649	Al-Shayeb.et.al.2020	Unknown	Unknown	0.296479	Medium-quality	Genome-fragment	No	/	No	/
js4906-26-2_S25_scaffold_62_prodigal-single	huge_phage_5974	230939	Al-Shayeb.et.al.2020	Host-associated;Human;Digestive system	Animal digestive system	0.289358	Complete	High-quality	Yes	/	No	/
BML_coassembly_scaffold_172_curated_closed_complete_prodigal-single	huge_phage_6055	331854	Al-Shayeb.et.al.2020	Environmental;Aquatic;Freshwater	Freshwater	0.304041	High-quality	High-quality	No	/	No	/
PH2015_22_scaffold_0_prodigal-single	huge_phage_6074	244777	Al-Shayeb.et.al.2020	Environmental;Aquatic;Freshwater	Freshwater	0.478525	High-quality	High-quality	Yes	/	No	/
P0_An_GD2017L_S7_170907_scaffold_746154_prodigal-single	huge_phage_6151	235337	Al-Shayeb.et.al.2020	Environmental;Terrestrial;Deep subsurface	Deep subsurface	0.633844	Low-quality	Genome-fragment	Yes	/	No	/
pig_ID_3630_F33_scaffold_4_curated_closed_complete_prodigal-single	huge_phage_6177	283605	Al-Shayeb.et.al.2020	Host-associated;Mammals;Digestive system	Animal digestive system	0.361221	High-quality	High-quality	No	/	No	/
term1_saliva_scaffold_5_curated_closed_gap_prodigal-single	huge_phage_6295	226076	Al-Shayeb.et.al.2020	Host-associated;Human;Digestive system	Animal digestive system	0.302094	High-quality	High-quality	Yes	/	No	/
gwe1_scaffold_79_prodigal-single	huge_phage_6320	219483	Al-Shayeb.et.al.2020	Environmental;Terrestrial;Deep subsurface	Deep subsurface	0.387907	High-quality	High-quality	Yes	/	No	/
gwd2_scaffold_22_prodigal-single	huge_phage_6325	225085	Al-Shayeb.et.al.2020	Environmental;Terrestrial;Deep subsurface	Deep subsurface	0.395939	Complete	High-quality	Yes	/	No	/
SR-VP_4-6_scaffold_141_3113143_prodigal-single	huge_phage_6397	247085	Al-Shayeb.et.al.2020	Environmental;Terrestrial;Soil	Soil	0.37715	Medium-quality	Genome-fragment	Yes	/	No	/
SRR1747052_scaffold_2_prodigal-single	huge_phage_6399	268100	Al-Shayeb.et.al.2020	Host-associated;Mammals;Digestive system	Animal digestive system	0.502928	Complete	High-quality	Yes	/	No	/
SRR1747048_scaffold_1_prodigal-single	huge_phage_6731	262544	Al-Shayeb.et.al.2020	Host-associated;Mammals;Digestive system	Animal digestive system	0.312805	High-quality	High-quality	Yes	/	No	/
pig_ID_3687_F49_scaffold_3_curated_prodigal-single	huge_phage_6768	240683	Al-Shayeb.et.al.2020	Host-associated;Mammals;Digestive system	Animal digestive system	0.272165	High-quality	High-quality	Yes	/	No	/
qs_7_scaffold_0_curated_closed_complete_prodigal-single	huge_phage_6771	484177	Al-Shayeb.et.al.2020	Amundson_desert	Others	0.395531	High-quality	High-quality	No	/	No	/
PHAGE-A3--js4906-20-2_S1_scaffold_104-98_curated_closed_complete_prodigal-single	huge_phage_6961	352502	Al-Shayeb.et.al.2020	Host-associated;Mammals;Digestive system	Animal digestive system	0.339087	Complete	High-quality	No	/	No	/
GWB1_scaffold_5_curated_closed_complete_prodigal-single	huge_phage_7057	485034	Al-Shayeb.et.al.2020	Environmental;Terrestrial;Deep subsurface	Deep subsurface	0.551139	High-quality	High-quality	No	/	No	/
CG_2015-01t_scaffold_1_prodigal-single	huge_phage_7105	415220	Al-Shayeb.et.al.2020	Environmental;Terrestrial;Deep subsurface	Deep subsurface	0.337142	High-quality	High-quality	Yes	/	No	/
GOV_bin_1711_contig-70_0_prodigal-single	huge_phage_7119	317750	Al-Shayeb.et.al.2020	Marine	Marine	0.566228	Complete	High-quality	Yes	/	No	/
SRR1747061_scaffold_21_prodigal-single	huge_phage_7187	256059	Al-Shayeb.et.al.2020	Host-associated;Mammals;Digestive system	Animal digestive system	0.497198	Medium-quality	Genome-fragment	Yes	/	No	/
aot2015-SM42_SRR1761719_Peru_trim_clean_trim_clean_scaffold_4_curated_closed_complete_prodigal-single	huge_phage_7219	204597	Al-Shayeb.et.al.2020	Human gut	Animal digestive system	0.326588	High-quality	High-quality	No	/	No	/
P0_An_pond3_S8_170907_scaffold_156969_prodigal-single	huge_phage_7242	327552	Al-Shayeb.et.al.2020	Environmental;Terrestrial;Deep subsurface	Deep subsurface	0.635719	Medium-quality	Genome-fragment	Yes	/	No	/
PHAGE-A5--js4906-26-5_S28_scaffold_15_curated_closed_complete_prodigal-single	huge_phage_7306	309049	Al-Shayeb.et.al.2020	Host-associated;Mammals;Digestive system	Animal digestive system	0.321865	High-quality	High-quality	No	/	No	/
Rifle_16ft_4_minimus_37632_prodigal-single	huge_phage_7344	281267	Al-Shayeb.et.al.2020	Environmental;Terrestrial;Deep subsurface	Deep subsurface	0.294013	Medium-quality	Genome-fragment	Yes	/	No	/
scnpilot_solids2_trim150_scaffold_133_prodigal-single	huge_phage_7392	239032	Al-Shayeb.et.al.2020	Engineered;Biotransformation;Bioreactor	Bioreactor	0.32007	Medium-quality	Genome-fragment	Yes	/	No	/
PH2015_07_scaffold_0_prodigal-single	huge_phage_7422	356193	Al-Shayeb.et.al.2020	Environmental;Aquatic;Freshwater	Freshwater	0.395847	Complete	High-quality	No	/	No	/
S2_005_002_R2_scaffold_27_prodigal-single	huge_phage_7429	259130	Al-Shayeb.et.al.2020	NICU Room Metagenomes	Others	0.495138	High-quality	High-quality	No	/	No	/
BML_coassembly_scaffold_234_prodigal-single	huge_phage_7515	276025	Al-Shayeb.et.al.2020	Environmental;Aquatic;Freshwater	Freshwater	0.482641	Medium-quality	Genome-fragment	Yes	/	No	/
SRR1747032_scaffold_11_prodigal-single	huge_phage_7596	269247	Al-Shayeb.et.al.2020	Host-associated;Mammals;Digestive system	Animal digestive system	0.502695	Medium-quality	Genome-fragment	Yes	/	No	/
SRR1747022_scaffold_43_prodigal-single	huge_phage_7611	200765	Al-Shayeb.et.al.2020	Host-associated;Mammals;Digestive system	Animal digestive system	0.322373	Complete	High-quality	Yes	/	No	/
PHAGE-A12--js4906-22-5_S12_scaffold_9_curated_closed_complete_prodigal-single	huge_phage_7626	209257	Al-Shayeb.et.al.2020	Host-associated;Mammals;Digestive system	Animal digestive system	0.316343	High-quality	High-quality	No	/	No	/
PH2015_18_scaffold_2_prodigal-single	huge_phage_7638	356183	Al-Shayeb.et.al.2020	Environmental;Aquatic;Freshwater	Freshwater	0.395853	Complete	High-quality	No	/	No	/
ALT_07252016_14_scaffold_1_prodigal-single	huge_phage_7800	223190	Al-Shayeb.et.al.2020	Environmental;Aquatic;Freshwater	Freshwater	0.396304	Complete	High-quality	No	/	No	/
PHAGE-A8--js4906-27-3_S30_scaffold_1_curated_closed_complete_prodigal-single	huge_phage_7817	288272	Al-Shayeb.et.al.2020	Host-associated;Mammals;Digestive system	Animal digestive system	0.273377	High-quality	High-quality	No	/	No	/
S19_GE19_scaffold_2259_prodigal-single	huge_phage_7906	401108	Al-Shayeb.et.al.2020	Groundwater	Groundwater	0.479728	High-quality	High-quality	Yes	/	No	/
pre3_saliva_scaffold_6_prodigal-single	huge_phage_7917	243172	Al-Shayeb.et.al.2020	Host-associated;Human;Digestive system	Animal digestive system	0.351105	Complete	High-quality	Yes	/	No	/
SRR1747040_scaffold_0_curated_prodigal-single	huge_phage_7951	263141	Al-Shayeb.et.al.2020	Host-associated;Mammals;Digestive system	Animal digestive system	0.31286	High-quality	High-quality	Yes	/	No	/
S27_BME27_629333_prodigal-single	huge_phage_7978	401365	Al-Shayeb.et.al.2020	Unknown	Unknown	0.479706	High-quality	High-quality	Yes	/	No	/
Carm_scaffold_0_prodigal-single	huge_phage_8006	231862	Al-Shayeb.et.al.2020	Unknown	Unknown	0.530984	Medium-quality	Genome-fragment	No	/	No	/
term4_saliva_scaffold_12_prodigal-single	huge_phage_8122	201051	Al-Shayeb.et.al.2020	Host-associated;Human;Digestive system	Animal digestive system	0.315507	Complete	High-quality	Yes	/	No	/
CG_2015-01t_scaffold_8_prodigal-single	huge_phage_8181	264154	Al-Shayeb.et.al.2020	Environmental;Terrestrial;Deep subsurface	Deep subsurface	0.355251	Complete	High-quality	Yes	/	No	/
gwc1_scaffold_2_prodigal-single	huge_phage_8187	332697	Al-Shayeb.et.al.2020	Environmental;Terrestrial;Deep subsurface	Deep subsurface	0.381488	Complete	High-quality	No	/	No	/
SRR1747052_scaffold_1_prodigal-single	huge_phage_8199	313492	Al-Shayeb.et.al.2020	Host-associated;Mammals;Digestive system	Animal digestive system	0.321415	Complete	High-quality	Yes	/	No	/
rifoxyb1_full_scaffold_31_prodigal-single	huge_phage_8246	264740	Al-Shayeb.et.al.2020	Environmental;Terrestrial;Deep subsurface	Deep subsurface	0.289031	Complete	High-quality	Yes	/	No	/
PH2015_20_scaffold_1_prodigal-single	huge_phage_8273	305387	Al-Shayeb.et.al.2020	unknown	Freshwater	0.343001	Complete	High-quality	No	/	No	/
rifoxya1_full_scaffold_4_prodigal-single	huge_phage_8477	221305	Al-Shayeb.et.al.2020	Environmental;Terrestrial;Deep subsurface	Deep subsurface	0.343146	Complete	High-quality	No	/	No	/
BML_08182015_6_5m_scaffold_18_prodigal-single	huge_phage_8556	266666	Al-Shayeb.et.al.2020	Environmental;Aquatic;Freshwater	Freshwater	0.464527	Medium-quality	Genome-fragment	Yes	/	No	/
pre3_saliva_scaffold_5_prodigal-single	huge_phage_8569	257052	Al-Shayeb.et.al.2020	Host-associated;Human;Digestive system	Animal digestive system	0.342783	Complete	High-quality	Yes	/	No	/
PHAGE-A7--js4906-24-3_S18_scaffold_0_curated_closed_complete_start-adj_prodigal-single	huge_phage_8655	267254	Al-Shayeb.et.al.2020	Host-associated;Mammals;Digestive system	Animal digestive system	0.293758	High-quality	High-quality	No	/	No	/
SRR1747046_scaffold_45_prodigal-single	huge_phage_8667	211369	Al-Shayeb.et.al.2020	Host-associated;Mammals;Digestive system	Animal digestive system	0.384515	Medium-quality	Genome-fragment	Yes	/	No	/
S2_006_000_R2_scaffold_44_prodigal-single	huge_phage_8691	267210	Al-Shayeb.et.al.2020	NICU Room Metagenomes	Others	0.483302	Complete	High-quality	Yes	/	No	/
BML_08012017_8_0m_scaffold_2_prodigal-single	huge_phage_8730	325039	Al-Shayeb.et.al.2020	Environmental;Aquatic;Freshwater	Freshwater	0.311335	Complete	High-quality	No	/	No	/
PHAGE-A11--js4906-26-5_S28_scaffold_6_curated_closed_complete_prodigal-single	huge_phage_8765	231121	Al-Shayeb.et.al.2020	Host-associated;Mammals;Digestive system	Animal digestive system	0.289368	High-quality	High-quality	No	/	No	/
SRR1747040_scaffold_2_curated_closed_complete_prodigal-single	huge_phage_8780	202585	Al-Shayeb.et.al.2020	Host-associated;Mammals;Digestive system	Animal digestive system	0.355362	High-quality	High-quality	No	/	No	/
SRR1747057_scaffold_1_prodigal-single	huge_phage_8814	261914	Al-Shayeb.et.al.2020	Host-associated;Mammals;Digestive system	Animal digestive system	0.312874	High-quality	High-quality	Yes	/	No	/
pig_ID_3053_F12_scaffold_0_curated_closed_complete_prodigal-single	huge_phage_8931	286080	Al-Shayeb.et.al.2020	Host-associated;Mammals;Digestive system	Animal digestive system	0.361969	High-quality	High-quality	No	/	No	/
H16_Tanzania_scaffold_1_curated_prodigal-single	huge_phage_4476	255295	Al-Shayeb.et.al.2020	Host-associated;Human;Digestive system	Animal digestive system	0.30775	High-quality	High-quality	Yes	cluster12	No	/
pre1_saliva_scaffold_1_prodigal-single	huge_phage_6313	280283	Al-Shayeb.et.al.2020	Host-associated;Human;Digestive system	Animal digestive system	0.311125	Complete	High-quality	Yes	cluster24	No	/
pre3_saliva_scaffold_3_prodigal-single	huge_phage_7649	278879	Al-Shayeb.et.al.2020	Host-associated;Human;Digestive system	Animal digestive system	0.311009	High-quality	High-quality	Yes	cluster24	No	/
rifoxyc1_full_scaffold_4_prodigal-single	huge_phage_2296	221454	Al-Shayeb.et.al.2020	Environmental;Terrestrial;Deep subsurface	Deep subsurface	0.343006	Complete	High-quality	Yes	cluster30	No	/
rifoxyd1_full_scaffold_6_prodigal-single	huge_phage_3889	221511	Al-Shayeb.et.al.2020	Environmental;Terrestrial;Deep subsurface	Deep subsurface	0.343094	Complete	High-quality	Yes	cluster30	No	/
rifoxyb1_full_scaffold_4_prodigal-single	huge_phage_6769	221304	Al-Shayeb.et.al.2020	Environmental;Terrestrial;Deep subsurface	Deep subsurface	0.343112	Complete	High-quality	Yes	cluster30	No	/
rifoxyc1_sub10_scaffold_1_prodigal-single	huge_phage_8242	221205	Al-Shayeb.et.al.2020	Environmental;Terrestrial;Deep subsurface	Deep subsurface	0.343089	High-quality	High-quality	Yes	cluster30	No	/
js4906-24-4_S19_scaffold_0_prodigal-single	huge_phage_3655	266687	Al-Shayeb.et.al.2020	Host-associated;Human;Digestive system	Animal digestive system	0.293843	Complete	High-quality	Yes	cluster38	No	/
js4906-24-2_S17_scaffold_16_prodigal-single	huge_phage_6040	266626	Al-Shayeb.et.al.2020	Host-associated;Human;Digestive system	Animal digestive system	0.293977	High-quality	High-quality	Yes	cluster38	No	/
js4906-24-5_S20_scaffold_1_prodigal-single	huge_phage_8768	266778	Al-Shayeb.et.al.2020	Host-associated;Human;Digestive system	Animal digestive system	0.293911	Complete	High-quality	Yes	cluster38	No	/
SRR943325vs2_SRR943325_NODE_33_length_205641_cov_2.937046_full	huge_phage_8937	205641	An.et.al.2024	Engineered;WWTP;Wastewater	WWTP	0.386533	Medium-quality	Genome-fragment	Yes	/	Yes	Viruses;Duplodnaviria;Heunggongvirae;Uroviricota;Caudoviricetes
SRR943316_NODE_51_length_206189_cov_1.921810	huge_phage_8938	206189	An.et.al.2024	Engineered;WWTP;Wastewater	WWTP	0.400841	Medium-quality	Genome-fragment	Yes	/	Yes	Viruses;Duplodnaviria;Heunggongvirae;Uroviricota;Caudoviricetes
BJ5_k141_255091_flag=0_multi=44.9424_len=242801	huge_phage_8939	242801	An.et.al.2024	Engineered;WWTP;Wastewater	WWTP	0.407144	Medium-quality	Genome-fragment	Yes	/	Yes	Viruses;Duplodnaviria;Heunggongvirae;Uroviricota;Caudoviricetes
SRR943320_NODE_33_length_244550_cov_2.317609	huge_phage_8940	244550	An.et.al.2024	Engineered;WWTP;Wastewater	WWTP	0.503631	High-quality	High-quality	Yes	/	Yes	Viruses;Duplodnaviria;Heunggongvirae;Uroviricota;Caudoviricetes
L7_NODE_36_length_215678_cov_196.480578	huge_phage_8941	215678	An.et.al.2024	Engineered;WWTP;Wastewater	WWTP	0.547358	Medium-quality	Genome-fragment	Yes	/	Yes	Viruses;Duplodnaviria;Heunggongvirae;Uroviricota;Caudoviricetes
L792_NODE_25_length_335867_cov_18.641839	huge_phage_8942	335867	An.et.al.2024	Engineered;WWTP;Wastewater	WWTP	0.31316	Complete	High-quality	Yes	/	Yes	Viruses;Duplodnaviria;Heunggongvirae;Uroviricota;Caudoviricetes
SRR943324vs2_SRR943324_NODE_19_length_246157_cov_2.519721_full	huge_phage_8943	246157	An.et.al.2024	Engineered;WWTP;Wastewater	WWTP	0.403474	Medium-quality	Genome-fragment	Yes	/	Yes	Viruses;Duplodnaviria;Heunggongvirae;Uroviricota;Caudoviricetes
OGZS01000006.1	huge_phage_5207	237972	Benler.et.al.2021	Host-associated;Mammals: Human;Digestive system	Animal digestive system	0.465492	Complete	High-quality	Yes	/	No	/
OBAD01000001.1	huge_phage_5284	294491	Benler.et.al.2021	Host-associated;Mammals: Human;Digestive system	Animal digestive system	0.310318	Complete	High-quality	No	/	No	/
OLHA01000002.1	huge_phage_7147	203315	Benler.et.al.2021	Host-associated;Mammals: Human;Digestive system	Animal digestive system	0.348863	Complete	High-quality	No	/	No	/
OJNH01000001.1	huge_phage_8571	285558	Benler.et.al.2021	Host-associated;Mammals: Human;Digestive system	Animal digestive system	0.252446	Medium-quality	Genome-fragment	Yes	cluster23	No	/
scaffold_153475	huge_phage_1612	215488	Borges.et.al.2022	Host-associated;Mammals;Digestive system	Animal digestive system	0.284174	High-quality	High-quality	Yes	/	Yes	Viruses;Duplodnaviria;Heunggongvirae;Uroviricota;Caudoviricetes
JS_HF2_S141_scaffold_159238	huge_phage_1783	224115	Borges.et.al.2022	Host-associated;Mammals;Digestive system	Animal digestive system	0.328737	Complete	High-quality	Yes	/	Yes	Viruses;Duplodnaviria;Heunggongvirae;Uroviricota;Caudoviricetes
JS_HF3_S142_scaffold_205978	huge_phage_1862	238344	Borges.et.al.2022	Host-associated;Mammals;Digestive system	Animal digestive system	0.304747	High-quality	High-quality	Yes	/	Yes	Viruses;Duplodnaviria;Heunggongvirae;Uroviricota;Caudoviricetes
JS_HA1_S131_scaffold_412568	huge_phage_1885	306459	Borges.et.al.2022	Host-associated;Mammals;Digestive system	Animal digestive system	0.306923	Complete	High-quality	Yes	/	Yes	Viruses;Duplodnaviria;Heunggongvirae;Uroviricota;Caudoviricetes
aot2015-SM02_SRR1761699_Peru_trim_clean_trim_clean_scaffold_10_curated_closed_complete_start-adj_prodigal-single	huge_phage_2065	201373	Borges.et.al.2022	Host-associated;Mammals;Digestive system	Animal digestive system	0.339306	High-quality	High-quality	Yes	/	Yes	Viruses;Duplodnaviria;Heunggongvirae;Uroviricota;Caudoviricetes
Cattle_ERR2019402_scaffold_680681	huge_phage_2467	209437	Borges.et.al.2022	Host-associated;Mammals;Digestive system	Animal digestive system	0.342695	High-quality	High-quality	Yes	/	Yes	Viruses;Duplodnaviria;Heunggongvirae;Uroviricota;Caudoviricetes;Crassvirales
JS_HA3_S133_scaffold_534305	huge_phage_4306	206276	Borges.et.al.2022	Host-associated;Mammals;Digestive system	Animal digestive system	0.433904	Complete	High-quality	Yes	/	Yes	Viruses;Duplodnaviria;Heunggongvirae;Uroviricota;Caudoviricetes
baboon_AMB_007_scaffold_42191	huge_phage_4925	200930	Borges.et.al.2022	Host-associated;Mammals;Digestive system	Animal digestive system	0.323277	Complete	High-quality	Yes	/	Yes	Viruses;Duplodnaviria;Heunggongvirae;Uroviricota;Caudoviricetes
SRR1747052_scaffold_7_prodigal-single	huge_phage_5920	208650	Borges.et.al.2022	Host-associated;Mammals;Digestive system	Animal digestive system	0.338591	Complete	High-quality	Yes	/	Yes	Viruses;Duplodnaviria;Heunggongvirae;Uroviricota;Caudoviricetes
scaffold_104394	huge_phage_6712	291247	Borges.et.al.2022	Host-associated;Mammals;Digestive system	Animal digestive system	0.383841	High-quality	High-quality	Yes	/	Yes	Viruses;Duplodnaviria;Heunggongvirae;Uroviricota;Caudoviricetes
JS_HE2_S138_scaffold_9600	huge_phage_7396	322325	Borges.et.al.2022	Host-associated;Mammals;Digestive system	Animal digestive system	0.38704	High-quality	High-quality	Yes	/	Yes	Viruses;Duplodnaviria;Heunggongvirae;Uroviricota;Caudoviricetes
JS_AP1_S143_scaffold_136784	huge_phage_8600	203367	Borges.et.al.2022	Host-associated;Mammals;Digestive system	Animal digestive system	0.321098	High-quality	High-quality	Yes	/	Yes	Viruses;Duplodnaviria;Heunggongvirae;Uroviricota;Caudoviricetes
JS_HB1_S134_scaffold_565796	huge_phage_8829	318372	Borges.et.al.2022	Host-associated;Mammals;Digestive system	Animal digestive system	0.333352	Complete	High-quality	Yes	/	Yes	Viruses;Duplodnaviria;Heunggongvirae;Uroviricota;Caudoviricetes
H18_Tanzania_scaffold_0	huge_phage_4920	216408	Borges.et.al.2022	Host-associated;Mammals;Digestive system	Animal digestive system	0.331309	High-quality	High-quality	Yes	/	No	/
PHAGE-A6--js4906-27-3_S30_scaffold_5_curated_closed_complete_prodigal-single	huge_phage_7319	227431	Borges.et.al.2022	Host-associated;Mammals;Digestive system	Animal digestive system	0.340222	High-quality	High-quality	No	/	No	/
SRR1747018_scaffold_13	huge_phage_8587	209946	Borges.et.al.2022	Host-associated;Mammals;Digestive system	Animal digestive system	0.3346	Complete	High-quality	No	/	No	/
SRR1747035_scaffold_3	huge_phage_8883	213508	Borges.et.al.2022	Host-associated;Mammals;Digestive system	Animal digestive system	0.333388	Complete	High-quality	No	/	No	/
LAK-phage_B10--M12_SRR1747042_26_21_curated	huge_phage_5059	546119	Borges.et.al.2022	Host-associated;Mammals;Digestive system	Animal digestive system	0.260326	High-quality	High-quality	Yes	cluster09	No	/
IMGVR_UViG_3300045988_173816_1	huge_phage_1198	273805	Camargo.et.al.2023	Host-associated;Mammals: Human;Digestive system	Animal digestive system	0.357294	High-quality	High-quality	Yes	/	Yes	Viruses;Duplodnaviria;Heunggongvirae;Uroviricota;Caudoviricetes
IMGVR_UViG_3300032327_000792_1	huge_phage_1200	309020	Camargo.et.al.2023	Environmental;Aquatic;Freshwater	Freshwater	0.42684	Medium-quality	Genome-fragment	Yes	/	Yes	Viruses;Duplodnaviria;Heunggongvirae;Uroviricota;Caudoviricetes
IMGVR_UViG_3300042477_000769_1	huge_phage_1201	253121	Camargo.et.al.2023	Environmental;Aquatic;Freshwater	Freshwater	0.34109	Medium-quality	Genome-fragment	Yes	/	Yes	Viruses;Duplodnaviria;Heunggongvirae;Uroviricota;Caudoviricetes
IMGVR_UViG_3300044644_001125_1	huge_phage_1202	322356	Camargo.et.al.2023	Environmental;Aquatic;Freshwater	Freshwater	0.381135	Medium-quality	Genome-fragment	Yes	/	Yes	Viruses;Duplodnaviria;Heunggongvirae;Uroviricota;Caudoviricetes
IMGVR_UViG_3300044655_001017_1	huge_phage_1207	340093	Camargo.et.al.2023	Environmental;Aquatic;Freshwater	Freshwater	0.361039	Medium-quality	Genome-fragment	Yes	/	Yes	Viruses;Duplodnaviria;Heunggongvirae;Uroviricota;Caudoviricetes
IMGVR_UViG_3300019776_000324_1	huge_phage_1208	340624	Camargo.et.al.2023	Environmental;Aquatic;Freshwater	Freshwater	0.405567	Medium-quality	Genome-fragment	Yes	/	Yes	Viruses;Duplodnaviria;Heunggongvirae;Uroviricota;Caudoviricetes
IMGVR_UViG_3300047564_002110_1	huge_phage_1211	378875	Camargo.et.al.2023	Environmental;Aquatic;Freshwater	Freshwater	0.38964	High-quality	High-quality	Yes	/	Yes	Viruses;Duplodnaviria;Heunggongvirae;Uroviricota;Caudoviricetes
IMGVR_UViG_3300032323_001214_1	huge_phage_1213	234588	Camargo.et.al.2023	Environmental;Aquatic;Freshwater	Freshwater	0.375369	Medium-quality	Genome-fragment	Yes	/	Yes	Viruses;Duplodnaviria;Heunggongvirae;Uroviricota;Caudoviricetes
IMGVR_UViG_3300042889_001503_1	huge_phage_1217	266042	Camargo.et.al.2023	Environmental;Aquatic;Freshwater	Freshwater	0.322434	High-quality	High-quality	Yes	/	Yes	Viruses;Duplodnaviria;Heunggongvirae;Uroviricota;Caudoviricetes
IMGVR_UViG_3300037418_003161_1	huge_phage_1222	234674	Camargo.et.al.2023	Host-associated;Plants;Roots	Plants-related	0.402533	Medium-quality	Genome-fragment	Yes	/	Yes	Viruses;Duplodnaviria;Heunggongvirae;Uroviricota;Caudoviricetes
IMGVR_UViG_3300032132_000001_1	huge_phage_1226	391907	Camargo.et.al.2023	Environmental;Aquatic;Marine	Marine	0.505503	High-quality	High-quality	Yes	/	Yes	Viruses;Duplodnaviria;Heunggongvirae;Uroviricota;Caudoviricetes
IMGVR_UViG_3300047491_001507_1	huge_phage_1227	271021	Camargo.et.al.2023	Environmental;Aquatic;Freshwater	Freshwater	0.364064	High-quality	High-quality	Yes	/	Yes	Viruses;Duplodnaviria;Heunggongvirae;Uroviricota;Caudoviricetes
IMGVR_UViG_3300009132_000290_1	huge_phage_1229	221548	Camargo.et.al.2023	Environmental;Aquatic;Marine	Marine	0.347085	Medium-quality	Genome-fragment	Yes	/	Yes	Viruses;Duplodnaviria;Heunggongvirae;Uroviricota;Caudoviricetes
IMGVR_UViG_3300017917_002466_1	huge_phage_1233	243935	Camargo.et.al.2023	Environmental;Aquatic;Freshwater	Freshwater	0.336335	High-quality	High-quality	Yes	/	Yes	Viruses;Duplodnaviria;Heunggongvirae;Uroviricota;Caudoviricetes
IMGVR_UViG_3300041809_000571_1	huge_phage_1234	311366	Camargo.et.al.2023	Environmental;Terrestrial;Soil	Soil	0.538806	High-quality	High-quality	Yes	/	Yes	Viruses;Duplodnaviria;Heunggongvirae;Uroviricota;Caudoviricetes
IMGVR_UViG_3300046660_000488_1	huge_phage_1243	567134	Camargo.et.al.2023	Host-associated;Plants;Roots	Plants-related	0.589633	High-quality	High-quality	Yes	/	Yes	Viruses;Duplodnaviria;Heunggongvirae;Uroviricota;Caudoviricetes
IMGVR_UViG_3300005613_000002_1	huge_phage_1244	302638	Camargo.et.al.2023	Environmental;Aquatic;Non-marine Saline and Alkaline	Non-marine Saline and Alkaline	0.272619	High-quality	High-quality	Yes	/	Yes	Viruses;Duplodnaviria;Heunggongvirae;Uroviricota;Caudoviricetes
IMGVR_UViG_3300043570_001980_1	huge_phage_1245	329854	Camargo.et.al.2023	Environmental;Aquatic;Freshwater	Freshwater	0.407505	Medium-quality	Genome-fragment	Yes	/	Yes	Viruses;Duplodnaviria;Heunggongvirae;Uroviricota;Caudoviricetes
IMGVR_UViG_3300046787_000408_1	huge_phage_1250	282022	Camargo.et.al.2023	Environmental;Aquatic;Freshwater	Freshwater	0.451628	Medium-quality	Genome-fragment	Yes	/	Yes	Viruses;Duplodnaviria;Heunggongvirae;Uroviricota;Caudoviricetes
IMGVR_UViG_3300025676_000713_1	huge_phage_1252	319059	Camargo.et.al.2023	Environmental;Aquatic;Marine	Marine	0.357219	Medium-quality	Genome-fragment	Yes	/	Yes	Viruses;Duplodnaviria;Heunggongvirae;Uroviricota;Caudoviricetes
IMGVR_UViG_3300022555_000002_1	huge_phage_1253	249810	Camargo.et.al.2023	Environmental;Aquatic;Freshwater	Freshwater	0.361695	Medium-quality	Genome-fragment	Yes	/	Yes	Viruses;Duplodnaviria;Heunggongvirae;Uroviricota;Caudoviricetes
IMGVR_UViG_3300049144_000095_1	huge_phage_1256	246890	Camargo.et.al.2023	Environmental;Terrestrial;Soil	Soil	0.650452	High-quality	High-quality	Yes	/	Yes	Viruses;Duplodnaviria;Heunggongvirae;Uroviricota;Caudoviricetes
IMGVR_UViG_3300032226_000829_1	huge_phage_1259	316633	Camargo.et.al.2023	Environmental;Aquatic;Freshwater	Freshwater	0.39956	Medium-quality	Genome-fragment	Yes	/	Yes	Viruses;Duplodnaviria;Heunggongvirae;Uroviricota;Caudoviricetes
IMGVR_UViG_3300043464_002284_1	huge_phage_1263	221408	Camargo.et.al.2023	Environmental;Aquatic;Freshwater	Freshwater	0.367484	High-quality	High-quality	Yes	/	Yes	Viruses;Duplodnaviria;Heunggongvirae;Uroviricota;Caudoviricetes
IMGVR_UViG_3300011008_000003_1	huge_phage_1264	388223	Camargo.et.al.2023	Host-associated;Mammals;Digestive system	Animal digestive system	0.384936	High-quality	High-quality	Yes	/	Yes	Viruses;Duplodnaviria;Heunggongvirae;Uroviricota;Caudoviricetes
IMGVR_UViG_3300018012_000099_1	huge_phage_1265	236797	Camargo.et.al.2023	Environmental;Aquatic;Freshwater	Freshwater	0.393738	Medium-quality	Genome-fragment	Yes	/	Yes	Viruses;Duplodnaviria;Heunggongvirae;Uroviricota;Caudoviricetes
IMGVR_UViG_3300034104_005687_1	huge_phage_1267	335277	Camargo.et.al.2023	Environmental;Aquatic;Freshwater	Freshwater	0.45769	Medium-quality	Genome-fragment	Yes	/	Yes	Viruses;Duplodnaviria;Heunggongvirae;Uroviricota;Caudoviricetes
IMGVR_UViG_3300044997_001199_1	huge_phage_1268	212313	Camargo.et.al.2023	Environmental;Aquatic;Freshwater	Freshwater	0.494233	Medium-quality	Genome-fragment	Yes	/	Yes	Viruses;Duplodnaviria;Heunggongvirae;Uroviricota;Caudoviricetes
IMGVR_UViG_3300028797_000096_1	huge_phage_1272	222100	Camargo.et.al.2023	Host-associated;Mammals;Digestive system	Animal digestive system	0.290347	Medium-quality	Genome-fragment	Yes	/	Yes	Viruses;Duplodnaviria;Heunggongvirae;Uroviricota;Caudoviricetes
IMGVR_UViG_3300013121_000020_1	huge_phage_1276	347796	Camargo.et.al.2023	Engineered;WWTP;Activated Sludge	WWTP	0.387261	High-quality	High-quality	Yes	/	Yes	Viruses;Duplodnaviria;Heunggongvirae;Uroviricota;Caudoviricetes
IMGVR_UViG_3300025502_001322_1	huge_phage_1281	278997	Camargo.et.al.2023	Environmental;Aquatic;Non-marine Saline and Alkaline	Non-marine Saline and Alkaline	0.392535	Medium-quality	Genome-fragment	Yes	/	Yes	Viruses;Duplodnaviria;Heunggongvirae;Uroviricota;Caudoviricetes
IMGVR_UViG_3300028735_000003_1	huge_phage_1288	340751	Camargo.et.al.2023	Environmental;Aquatic;Thermal springs	Others	0.336419	High-quality	High-quality	Yes	/	Yes	Viruses;Duplodnaviria;Heunggongvirae;Uroviricota;Caudoviricetes
IMGVR_UViG_3300020477_000990_1	huge_phage_1289	327012	Camargo.et.al.2023	Environmental;Aquatic;Marine	Marine	0.317646	Medium-quality	Genome-fragment	Yes	/	Yes	Viruses;Duplodnaviria;Heunggongvirae;Uroviricota;Caudoviricetes
IMGVR_UViG_3300027749_002876_1	huge_phage_1290	520746	Camargo.et.al.2023	Environmental;Aquatic;Freshwater	Freshwater	0.367104	High-quality	High-quality	Yes	/	Yes	Viruses;Duplodnaviria;Heunggongvirae;Uroviricota;Caudoviricetes
IMGVR_UViG_3300027804_002812_1	huge_phage_1291	316311	Camargo.et.al.2023	Environmental;Aquatic;Freshwater	Freshwater	0.337826	High-quality	High-quality	Yes	/	Yes	Viruses;Duplodnaviria;Heunggongvirae;Uroviricota;Caudoviricetes
IMGVR_UViG_3300020045_008999_1	huge_phage_1292	593061	Camargo.et.al.2023	Environmental;Aquatic;Freshwater	Freshwater	0.31809	High-quality	High-quality	Yes	/	Yes	Viruses;Duplodnaviria;Heunggongvirae;Uroviricota;Caudoviricetes
IMGVR_UViG_3300021387_000452_1	huge_phage_1296	213747	Camargo.et.al.2023	Host-associated;Mammals;Digestive system	Animal digestive system	0.352403	High-quality	High-quality	Yes	/	Yes	Viruses;Duplodnaviria;Heunggongvirae;Uroviricota;Caudoviricetes
IMGVR_UViG_3300025671_008697_1	huge_phage_1299	207420	Camargo.et.al.2023	Environmental;Aquatic;Marine	Marine	0.401162	Medium-quality	Genome-fragment	Yes	/	Yes	Viruses;Duplodnaviria;Heunggongvirae;Uroviricota;Caudoviricetes
IMGVR_UViG_3300021964_010723_1	huge_phage_1302	242054	Camargo.et.al.2023	Environmental;Aquatic;Marine	Marine	0.339726	Medium-quality	Genome-fragment	Yes	/	Yes	Viruses;Duplodnaviria;Heunggongvirae;Uroviricota;Caudoviricetes
IMGVR_UViG_3300025162_000016_1	huge_phage_1303	357945	Camargo.et.al.2023	Environmental;Aquatic;Freshwater	Freshwater	0.357158	Medium-quality	Genome-fragment	Yes	/	Yes	Viruses;Duplodnaviria;Heunggongvirae;Uroviricota;Caudoviricetes
IMGVR_UViG_3300044796_000401_1	huge_phage_1307	234026	Camargo.et.al.2023	Environmental;Terrestrial;Soil	Soil	0.556101	Medium-quality	Genome-fragment	Yes	/	Yes	Viruses;Duplodnaviria;Heunggongvirae;Uroviricota;Caudoviricetes
IMGVR_UViG_3300037400_004242_1	huge_phage_1308	203439	Camargo.et.al.2023	Host-associated;Mammals;Digestive system	Animal digestive system	0.289664	High-quality	High-quality	Yes	/	Yes	Viruses;Duplodnaviria;Heunggongvirae;Uroviricota;Caudoviricetes
IMGVR_UViG_3300029288_000001_1	huge_phage_1313	214683	Camargo.et.al.2023	Engineered;Solid waste;Landfill	Landfill	0.408453	High-quality	High-quality	Yes	/	Yes	Viruses;Duplodnaviria;Heunggongvirae;Uroviricota;Caudoviricetes
IMGVR_UViG_3300021978_000001_1	huge_phage_1321	415151	Camargo.et.al.2023	Environmental;Aquatic;Marine	Marine	0.568022	High-quality	High-quality	Yes	/	Yes	Viruses;Duplodnaviria;Heunggongvirae;Uroviricota;Caudoviricetes
IMGVR_UViG_3300028888_000043_1	huge_phage_1323	406682	Camargo.et.al.2023	Host-associated;Mammals;Digestive system	Animal digestive system	0.392926	High-quality	High-quality	Yes	/	Yes	Viruses;Duplodnaviria;Heunggongvirae;Uroviricota;Caudoviricetes
IMGVR_UViG_3300005683_000578_1	huge_phage_1325	328786	Camargo.et.al.2023	Engineered;WWTP;Nutrient removal	WWTP	0.450138	High-quality	High-quality	Yes	/	Yes	Viruses;Duplodnaviria;Heunggongvirae;Uroviricota;Caudoviricetes
IMGVR_UViG_3300012347_000364_1	huge_phage_1333	215887	Camargo.et.al.2023	Environmental;Aquatic;Freshwater	Freshwater	0.433935	High-quality	High-quality	Yes	/	Yes	Viruses;Duplodnaviria;Heunggongvirae;Uroviricota;Caudoviricetes
IMGVR_UViG_3300027974_001530_1	huge_phage_1338	265081	Camargo.et.al.2023	Environmental;Aquatic;Freshwater	Freshwater	0.307087	High-quality	High-quality	Yes	/	Yes	Viruses;Duplodnaviria;Heunggongvirae;Uroviricota;Caudoviricetes
IMGVR_UViG_3300043414_000372_1	huge_phage_1339	214633	Camargo.et.al.2023	Environmental;Aquatic;Freshwater	Freshwater	0.373652	Medium-quality	Genome-fragment	Yes	/	Yes	Viruses;Duplodnaviria;Heunggongvirae;Uroviricota;Caudoviricetes
IMGVR_UViG_3300037295_000263_1	huge_phage_1346	208937	Camargo.et.al.2023	Environmental;Aquatic;Non-marine Saline and Alkaline	Non-marine Saline and Alkaline	0.357797	Medium-quality	Genome-fragment	Yes	/	Yes	Viruses;Duplodnaviria;Heunggongvirae;Uroviricota;Caudoviricetes
IMGVR_UViG_3300037882_001770_1	huge_phage_1347	306609	Camargo.et.al.2023	Environmental;Aquatic;Freshwater	Freshwater	0.426008	Medium-quality	Genome-fragment	Yes	/	Yes	Viruses;Duplodnaviria;Heunggongvirae;Uroviricota;Caudoviricetes
IMGVR_UViG_3300032227_000993_1	huge_phage_1348	297357	Camargo.et.al.2023	Environmental;Aquatic;Freshwater	Freshwater	0.4215	Medium-quality	Genome-fragment	Yes	/	Yes	Viruses;Duplodnaviria;Heunggongvirae;Uroviricota;Caudoviricetes
IMGVR_UViG_3300032315_001715_1	huge_phage_1350	447247	Camargo.et.al.2023	Environmental;Aquatic;Freshwater	Freshwater	0.492117	High-quality	High-quality	Yes	/	Yes	Viruses;Duplodnaviria;Heunggongvirae;Uroviricota;Caudoviricetes
IMGVR_UViG_3300027759_004177_1	huge_phage_1351	350097	Camargo.et.al.2023	Environmental;Aquatic;Freshwater	Freshwater	0.427096	Medium-quality	Genome-fragment	Yes	/	Yes	Viruses;Duplodnaviria;Heunggongvirae;Uroviricota;Caudoviricetes
IMGVR_UViG_3300007995_000002_1	huge_phage_1354	232972	Camargo.et.al.2023	Host-associated;Human;Digestive system	Animal digestive system	0.370521	Medium-quality	Genome-fragment	Yes	/	Yes	Viruses;Duplodnaviria;Heunggongvirae;Uroviricota;Caudoviricetes
IMGVR_UViG_3300029258_003221_1	huge_phage_1355	223548	Camargo.et.al.2023	Environmental;Aquatic;Marine	Marine	0.423256	Medium-quality	Genome-fragment	Yes	/	Yes	Viruses;Duplodnaviria;Heunggongvirae;Uroviricota;Caudoviricetes
IMGVR_UViG_3300033984_000473_1	huge_phage_1356	225820	Camargo.et.al.2023	Environmental;Aquatic;Freshwater	Freshwater	0.333279	Medium-quality	Genome-fragment	Yes	/	Yes	Viruses;Duplodnaviria;Heunggongvirae;Uroviricota;Caudoviricetes
IMGVR_UViG_3300027759_006101_1	huge_phage_1361	319346	Camargo.et.al.2023	Environmental;Aquatic;Freshwater	Freshwater	0.338933	High-quality	High-quality	Yes	/	Yes	Viruses;Duplodnaviria;Heunggongvirae;Uroviricota;Caudoviricetes
IMGVR_UViG_3300020465_001196_1	huge_phage_1363	286383	Camargo.et.al.2023	Environmental;Aquatic;Marine	Marine	0.323762	Medium-quality	Genome-fragment	Yes	/	Yes	Viruses;Duplodnaviria;Heunggongvirae;Uroviricota;Caudoviricetes
IMGVR_UViG_3300044551_000092_1	huge_phage_1364	200755	Camargo.et.al.2023	Engineered;Bioreactor;Anaerobic	Bioreactor	0.392364	High-quality	High-quality	Yes	/	Yes	Viruses;Duplodnaviria;Heunggongvirae;Uroviricota;Caudoviricetes
IMGVR_UViG_3300031994_002305_1	huge_phage_1365	372283	Camargo.et.al.2023	Host-associated;Mammals;Digestive system	Animal digestive system	0.268683	High-quality	High-quality	Yes	/	Yes	Viruses;Duplodnaviria;Heunggongvirae;Uroviricota;Caudoviricetes
IMGVR_UViG_3300028603_000019_1	huge_phage_1370	204848	Camargo.et.al.2023	Engineered;Solid waste;Landfill	Landfill	0.471281	High-quality	High-quality	Yes	/	Yes	Viruses;Duplodnaviria;Heunggongvirae;Uroviricota;Caudoviricetes
IMGVR_UViG_3300044712_000123_1	huge_phage_1374	337848	Camargo.et.al.2023	Host-associated;Plants;Roots	Plants-related	0.408272	Medium-quality	Genome-fragment	Yes	/	Yes	Viruses;Duplodnaviria;Heunggongvirae;Uroviricota;Caudoviricetes
IMGVR_UViG_3300008756_000002_1	huge_phage_1383	251205	Camargo.et.al.2023	Host-associated;Human;Digestive system	Animal digestive system	0.357127	High-quality	High-quality	Yes	/	Yes	Viruses;Duplodnaviria;Heunggongvirae;Uroviricota;Caudoviricetes
IMGVR_UViG_3300044712_001255_1	huge_phage_1384	315555	Camargo.et.al.2023	Host-associated;Plants;Roots	Plants-related	0.467364	High-quality	High-quality	Yes	/	Yes	Viruses;Duplodnaviria;Heunggongvirae;Uroviricota;Caudoviricetes
IMGVR_UViG_3300029288_000060_1	huge_phage_1387	220985	Camargo.et.al.2023	Engineered;Solid waste;Landfill	Landfill	0.27972	Medium-quality	Genome-fragment	Yes	/	Yes	Viruses;Duplodnaviria;Heunggongvirae;Uroviricota;Caudoviricetes
IMGVR_UViG_3300027734_003164_1	huge_phage_1388	206644	Camargo.et.al.2023	Environmental;Aquatic;Freshwater	Freshwater	0.306982	Medium-quality	Genome-fragment	Yes	/	Yes	Viruses;Duplodnaviria;Heunggongvirae;Uroviricota;Caudoviricetes
IMGVR_UViG_3300010389_000001_1	huge_phage_1389	226256	Camargo.et.al.2023	Environmental;Aquatic;Marine	Marine	0.425624	High-quality	High-quality	Yes	/	Yes	Viruses;Duplodnaviria;Heunggongvirae;Uroviricota;Caudoviricetes
IMGVR_UViG_3300020450_001133_1	huge_phage_1392	270933	Camargo.et.al.2023	Environmental;Aquatic;Marine	Marine	0.351246	Medium-quality	Genome-fragment	Yes	/	Yes	Viruses;Duplodnaviria;Heunggongvirae;Uroviricota;Caudoviricetes
IMGVR_UViG_3300029288_003766_1	huge_phage_1393	202776	Camargo.et.al.2023	Engineered;Solid waste;Landfill	Landfill	0.376346	Medium-quality	Genome-fragment	Yes	/	Yes	Viruses;Duplodnaviria;Heunggongvirae;Uroviricota;Caudoviricetes
IMGVR_UViG_3300005253_001115_1	huge_phage_1394	263473	Camargo.et.al.2023	Environmental;Aquatic;Marine	Marine	0.531618	Medium-quality	Genome-fragment	Yes	/	Yes	Viruses;Duplodnaviria;Heunggongvirae;Uroviricota;Caudoviricetes
IMGVR_UViG_3300023119_000004_1	huge_phage_1397	310238	Camargo.et.al.2023	Environmental;Aquatic;Marine	Marine	0.365871	Medium-quality	Genome-fragment	Yes	/	Yes	Viruses;Duplodnaviria;Heunggongvirae;Uroviricota;Caudoviricetes
IMGVR_UViG_3300037067_018912_1	huge_phage_1398	355062	Camargo.et.al.2023	Engineered;Solid waste;Landfill	Landfill	0.399443	High-quality	High-quality	Yes	/	Yes	Viruses;Duplodnaviria;Heunggongvirae;Uroviricota;Caudoviricetes
IMGVR_UViG_3300025000_000055_1	huge_phage_1400	226499	Camargo.et.al.2023	Environmental;Aquatic;Deep subsurface	Deep subsurface	0.247754	High-quality	High-quality	Yes	/	Yes	Viruses;Duplodnaviria;Heunggongvirae;Uroviricota;Caudoviricetes
IMGVR_UViG_3300037501_000111_1	huge_phage_1401	333968	Camargo.et.al.2023	Environmental;Aquatic;Thermal springs	Others	0.391256	High-quality	High-quality	Yes	/	Yes	Viruses;Duplodnaviria;Heunggongvirae;Uroviricota;Caudoviricetes
IMGVR_UViG_3300037808_002146_1	huge_phage_1403	201171	Camargo.et.al.2023	Environmental;Aquatic;Marine	Marine	0.385453	Medium-quality	Genome-fragment	Yes	/	Yes	Viruses;Duplodnaviria;Heunggongvirae;Uroviricota;Caudoviricetes
IMGVR_UViG_3300044640_001495_1	huge_phage_1404	345363	Camargo.et.al.2023	Environmental;Aquatic;Freshwater	Freshwater	0.411081	High-quality	High-quality	Yes	/	Yes	Viruses;Duplodnaviria;Heunggongvirae;Uroviricota;Caudoviricetes
IMGVR_UViG_3300002092_001784_1	huge_phage_1410	262338	Camargo.et.al.2023	Environmental;Aquatic;Freshwater	Freshwater	0.340347	High-quality	High-quality	Yes	/	Yes	Viruses;Duplodnaviria;Heunggongvirae;Uroviricota;Caudoviricetes
IMGVR_UViG_3300034093_002415_1	huge_phage_1414	220766	Camargo.et.al.2023	Environmental;Aquatic;Freshwater	Freshwater	0.319614	Medium-quality	Genome-fragment	Yes	/	Yes	Viruses;Duplodnaviria;Heunggongvirae;Uroviricota;Caudoviricetes
IMGVR_UViG_3300044991_001466_1	huge_phage_1422	262715	Camargo.et.al.2023	Environmental;Aquatic;Freshwater	Freshwater	0.312179	Medium-quality	Genome-fragment	Yes	/	Yes	Viruses;Duplodnaviria;Heunggongvirae;Uroviricota;Caudoviricetes
IMGVR_UViG_3300036760_000522_1	huge_phage_1424	295605	Camargo.et.al.2023	Environmental;Aquatic;Freshwater	Freshwater	0.533222	Medium-quality	Genome-fragment	Yes	/	Yes	Viruses;Duplodnaviria;Heunggongvirae;Uroviricota;Caudoviricetes
IMGVR_UViG_3300023174_002543_1	huge_phage_1428	360119	Camargo.et.al.2023	Environmental;Aquatic;Freshwater	Freshwater	0.364965	High-quality	High-quality	Yes	/	Yes	Viruses;Duplodnaviria;Heunggongvirae;Uroviricota;Caudoviricetes
IMGVR_UViG_3300025892_000008_1	huge_phage_1434	262297	Camargo.et.al.2023	Environmental;Aquatic;Marine	Marine	0.362806	Medium-quality	Genome-fragment	Yes	/	Yes	Viruses;Duplodnaviria;Heunggongvirae;Uroviricota;Caudoviricetes
IMGVR_UViG_3300032007_001727_1	huge_phage_1437	356708	Camargo.et.al.2023	Host-associated;Mammals;Digestive system	Animal digestive system	0.381968	High-quality	High-quality	Yes	/	Yes	Viruses;Duplodnaviria;Heunggongvirae;Uroviricota;Caudoviricetes
IMGVR_UViG_3300025608_000006_1	huge_phage_1438	204443	Camargo.et.al.2023	Environmental;Aquatic;Marine	Marine	0.382292	Medium-quality	Genome-fragment	Yes	/	Yes	Viruses;Duplodnaviria;Heunggongvirae;Uroviricota;Caudoviricetes
IMGVR_UViG_3300017763_003980_1	huge_phage_1445	217194	Camargo.et.al.2023	Environmental;Aquatic;Marine	Marine	0.354793	Medium-quality	Genome-fragment	Yes	/	Yes	Viruses;Duplodnaviria;Heunggongvirae;Uroviricota;Caudoviricetes
IMGVR_UViG_3300050034_000334_1	huge_phage_1448	336753	Camargo.et.al.2023	Environmental;Terrestrial;Soil	Soil	0.499829	High-quality	High-quality	Yes	/	Yes	Viruses;Duplodnaviria;Heunggongvirae;Uroviricota;Caudoviricetes
IMGVR_UViG_3300044712_000810_1	huge_phage_1451	314058	Camargo.et.al.2023	Host-associated;Plants;Roots	Plants-related	0.333362	High-quality	High-quality	Yes	/	Yes	Viruses;Duplodnaviria;Heunggongvirae;Uroviricota;Caudoviricetes
IMGVR_UViG_3300027782_000024_1	huge_phage_1452	256487	Camargo.et.al.2023	Environmental;Aquatic;Freshwater	Freshwater	0.403611	Medium-quality	Genome-fragment	Yes	/	Yes	Viruses;Duplodnaviria;Heunggongvirae;Uroviricota;Caudoviricetes
IMGVR_UViG_3300011906_000002_1	huge_phage_1454	216843	Camargo.et.al.2023	Engineered;Built environment;City	Built environment	0.510706	Medium-quality	Genome-fragment	Yes	/	Yes	Viruses;Duplodnaviria;Heunggongvirae;Uroviricota;Caudoviricetes
IMGVR_UViG_3300027736_001324_1	huge_phage_1457	241363	Camargo.et.al.2023	Environmental;Aquatic;Freshwater	Freshwater	0.370894	Medium-quality	Genome-fragment	Yes	/	Yes	Viruses;Duplodnaviria;Heunggongvirae;Uroviricota;Caudoviricetes
IMGVR_UViG_3300032268_000832	huge_phage_1463	306463	Camargo.et.al.2023	Environmental;Aquatic;Freshwater	Freshwater	0.308625	Medium-quality	Genome-fragment	Yes	/	Yes	Viruses;Duplodnaviria;Heunggongvirae;Uroviricota;Caudoviricetes
IMGVR_UViG_3300035661_000005	huge_phage_1470	200835	Camargo.et.al.2023	Environmental;Aquatic;Freshwater	Freshwater	0.641203	Low-quality	Genome-fragment	Yes	/	Yes	Viruses;Duplodnaviria;Heunggongvirae;Uroviricota;Caudoviricetes
IMGVR_UViG_3300044719_000253	huge_phage_1474	226011	Camargo.et.al.2023	Host-associated;Plants;Roots	Plants-related	0.539615	Medium-quality	Genome-fragment	Yes	/	Yes	Viruses;Duplodnaviria;Heunggongvirae;Uroviricota;Caudoviricetes
IMGVR_UViG_3300023175_000005	huge_phage_1476	256558	Camargo.et.al.2023	Environmental;Aquatic;Marine	Marine	0.355276	Medium-quality	Genome-fragment	Yes	/	Yes	Viruses;Duplodnaviria;Heunggongvirae;Uroviricota;Caudoviricetes
IMGVR_UViG_3300035182_002586	huge_phage_1482	528957	Camargo.et.al.2023	Environmental;Aquatic;Freshwater	Freshwater	0.638863	High-quality	High-quality	Yes	/	Yes	Viruses;Duplodnaviria;Heunggongvirae;Uroviricota;Caudoviricetes
IMGVR_UViG_3300037067_015585	huge_phage_1483	234376	Camargo.et.al.2023	Engineered;Solid waste;Landfill	Landfill	0.40531	Medium-quality	Genome-fragment	Yes	/	Yes	Viruses;Duplodnaviria;Heunggongvirae;Uroviricota;Caudoviricetes
IMGVR_UViG_3300008500_000038	huge_phage_1484	244368	Camargo.et.al.2023	Host-associated;Human;Digestive system	Animal digestive system	0.263013	High-quality	High-quality	Yes	/	Yes	Viruses;Duplodnaviria;Heunggongvirae;Uroviricota;Caudoviricetes
IMGVR_UViG_3300028025_000089	huge_phage_1485	240045	Camargo.et.al.2023	Environmental;Terrestrial;Deep subsurface	Deep subsurface	0.316924	Medium-quality	Genome-fragment	Yes	/	Yes	Viruses;Duplodnaviria;Heunggongvirae;Uroviricota;Caudoviricetes
IMGVR_UViG_3300007339_000098	huge_phage_1487	315042	Camargo.et.al.2023	Host-associated;Human;Digestive system	Animal digestive system	0.295424	Complete	High-quality	Yes	/	Yes	Viruses;Duplodnaviria;Heunggongvirae;Uroviricota;Caudoviricetes
IMGVR_UViG_3300013947_000022	huge_phage_1489	215374	Camargo.et.al.2023	Host-associated;Mammals;Digestive system	Animal digestive system	0.343669	High-quality	High-quality	Yes	/	Yes	Viruses;Duplodnaviria;Heunggongvirae;Uroviricota;Caudoviricetes
IMGVR_UViG_3300008110_010000	huge_phage_1492	219355	Camargo.et.al.2023	Environmental;Aquatic;Freshwater	Freshwater	0.352818	Medium-quality	Genome-fragment	Yes	/	Yes	Viruses;Duplodnaviria;Heunggongvirae;Uroviricota;Caudoviricetes
IMGVR_UViG_3300025015_000009	huge_phage_1496	318013	Camargo.et.al.2023	Environmental;Aquatic;Deep subsurface	Deep subsurface	0.420835	Medium-quality	Genome-fragment	Yes	/	Yes	Viruses;Duplodnaviria;Heunggongvirae;Uroviricota;Caudoviricetes
IMGVR_UViG_3300044712_001937	huge_phage_1501	364702	Camargo.et.al.2023	Host-associated;Plants;Roots	Plants-related	0.263163	Complete	High-quality	Yes	/	Yes	Viruses;Duplodnaviria;Heunggongvirae;Uroviricota;Caudoviricetes
IMGVR_UViG_3300032030_000009	huge_phage_1502	219489	Camargo.et.al.2023	Host-associated;Mammals;Digestive system	Animal digestive system	0.485705	Complete	High-quality	Yes	/	Yes	Viruses;Duplodnaviria;Heunggongvirae;Uroviricota;Caudoviricetes
IMGVR_UViG_3300033233_000001	huge_phage_1508	297749	Camargo.et.al.2023	Environmental;Aquatic;Freshwater	Freshwater	0.650981	High-quality	High-quality	Yes	/	Yes	Viruses;Duplodnaviria;Heunggongvirae;Uroviricota;Caudoviricetes
IMGVR_UViG_3300023178_000006	huge_phage_1513	200151	Camargo.et.al.2023	Environmental;Aquatic;Marine	Marine	0.361752	High-quality	High-quality	Yes	/	Yes	Viruses;Duplodnaviria;Heunggongvirae;Uroviricota;Caudoviricetes
IMGVR_UViG_3300042922_001051	huge_phage_1515	220554	Camargo.et.al.2023	Environmental;Terrestrial;Soil	Soil	0.540897	High-quality	High-quality	Yes	/	Yes	Viruses;Duplodnaviria;Heunggongvirae;Uroviricota;Caudoviricetes
IMGVR_UViG_3300043427_002668	huge_phage_1518	205809	Camargo.et.al.2023	Environmental;Aquatic;Freshwater	Freshwater	0.362715	High-quality	High-quality	Yes	/	Yes	Viruses;Duplodnaviria;Heunggongvirae;Uroviricota;Caudoviricetes
IMGVR_UViG_3300042261_001312	huge_phage_1524	327676	Camargo.et.al.2023	Environmental;Aquatic;Freshwater	Freshwater	0.311335	High-quality	High-quality	Yes	/	Yes	Viruses;Duplodnaviria;Heunggongvirae;Uroviricota;Caudoviricetes
IMGVR_UViG_3300008274_000006	huge_phage_1525	232483	Camargo.et.al.2023	Host-associated;Human;Digestive system	Animal digestive system	0.316191	High-quality	High-quality	Yes	/	Yes	Viruses;Duplodnaviria;Heunggongvirae;Uroviricota;Caudoviricetes
IMGVR_UViG_3300008715_000013	huge_phage_1526	201091	Camargo.et.al.2023	Host-associated;Human;Digestive system	Animal digestive system	0.270778	Medium-quality	Genome-fragment	Yes	/	Yes	Viruses;Duplodnaviria;Heunggongvirae;Uroviricota;Caudoviricetes
IMGVR_UViG_3300045988_127829	huge_phage_1527	231092	Camargo.et.al.2023	Host-associated;Mammals: Human;Digestive system	Animal digestive system	0.28985	High-quality	High-quality	Yes	/	Yes	Viruses;Duplodnaviria;Heunggongvirae;Uroviricota;Caudoviricetes
IMGVR_UViG_3300026521_000003	huge_phage_1529	289880	Camargo.et.al.2023	Environmental;Aquatic;Marine	Marine	0.273627	Medium-quality	Genome-fragment	Yes	/	Yes	Viruses;Duplodnaviria;Heunggongvirae;Uroviricota;Caudoviricetes
IMGVR_UViG_3300008575_000011	huge_phage_1531	203429	Camargo.et.al.2023	Host-associated;Human;Digestive system	Animal digestive system	0.270537	Medium-quality	Genome-fragment	Yes	/	Yes	Viruses;Duplodnaviria;Heunggongvirae;Uroviricota;Caudoviricetes
IMGVR_UViG_3300028888_001839	huge_phage_1532	251769	Camargo.et.al.2023	Host-associated;Mammals;Digestive system	Animal digestive system	0.482466	Complete	High-quality	Yes	/	Yes	Viruses;Duplodnaviria;Heunggongvirae;Uroviricota;Caudoviricetes
IMGVR_UViG_3300024239_000015	huge_phage_1535	233377	Camargo.et.al.2023	Environmental;Terrestrial;Deep subsurface	Deep subsurface	0.477725	Complete	High-quality	Yes	/	Yes	Viruses;Duplodnaviria;Heunggongvirae;Uroviricota;Caudoviricetes
IMGVR_UViG_3300017987_005500	huge_phage_1537	304911	Camargo.et.al.2023	Environmental;Aquatic;Non-marine Saline and Alkaline	Non-marine Saline and Alkaline	0.3132	High-quality	High-quality	Yes	/	Yes	Viruses;Duplodnaviria;Heunggongvirae;Uroviricota;Caudoviricetes
IMGVR_UViG_3300030104_006170	huge_phage_1538	240042	Camargo.et.al.2023	Environmental;Aquatic;Marine	Marine	0.324756	Medium-quality	Genome-fragment	Yes	/	Yes	Viruses;Duplodnaviria;Heunggongvirae;Uroviricota;Caudoviricetes
IMGVR_UViG_3300028534_000001	huge_phage_1539	222650	Camargo.et.al.2023	Host-associated;Annelida;Integument	Others	0.206283	Complete	High-quality	Yes	/	Yes	Viruses;Duplodnaviria;Heunggongvirae;Uroviricota;Caudoviricetes
IMGVR_UViG_3300028832_000095	huge_phage_1540	201895	Camargo.et.al.2023	Host-associated;Mammals;Digestive system	Animal digestive system	0.328706	Medium-quality	Genome-fragment	Yes	/	Yes	Viruses;Duplodnaviria;Heunggongvirae;Uroviricota;Caudoviricetes
IMGVR_UViG_3300008150_000006	huge_phage_1542	276610	Camargo.et.al.2023	Host-associated;Human;Digestive system	Animal digestive system	0.336311	High-quality	High-quality	Yes	/	Yes	Viruses;Duplodnaviria;Heunggongvirae;Uroviricota;Caudoviricetes
IMGVR_UViG_3300028410_000746	huge_phage_1543	284524	Camargo.et.al.2023	Environmental;Aquatic;Non-marine Saline and Alkaline	Non-marine Saline and Alkaline	0.604121	Medium-quality	Genome-fragment	Yes	/	Yes	Viruses;Duplodnaviria;Heunggongvirae;Uroviricota;Caudoviricetes
IMGVR_UViG_3300042326_002445	huge_phage_1547	223646	Camargo.et.al.2023	Environmental;Aquatic;Freshwater	Freshwater	0.347142	High-quality	High-quality	Yes	/	Yes	Viruses;Duplodnaviria;Heunggongvirae;Uroviricota;Caudoviricetes
IMGVR_UViG_3300044712_000786	huge_phage_1549	202704	Camargo.et.al.2023	Host-associated;Plants;Roots	Plants-related	0.39385	Complete	High-quality	Yes	/	Yes	Viruses;Duplodnaviria;Heunggongvirae;Uroviricota;Caudoviricetes
IMGVR_UViG_3300027969_000041	huge_phage_1550	201439	Camargo.et.al.2023	Environmental;Aquatic;Freshwater	Freshwater	0.38982	Low-quality	Genome-fragment	Yes	/	Yes	Viruses;Duplodnaviria;Heunggongvirae;Uroviricota;Caudoviricetes
IMGVR_UViG_3300008262_000013	huge_phage_1551	214809	Camargo.et.al.2023	Environmental;Aquatic;Freshwater	Freshwater	0.343943	High-quality	High-quality	Yes	/	Yes	Viruses;Duplodnaviria;Heunggongvirae;Uroviricota;Caudoviricetes
IMGVR_UViG_3300045988_177034	huge_phage_1554	221108	Camargo.et.al.2023	Host-associated;Mammals: Human;Digestive system	Animal digestive system	0.456741	High-quality	High-quality	Yes	/	Yes	Viruses;Duplodnaviria;Heunggongvirae;Uroviricota;Caudoviricetes
IMGVR_UViG_3300030047_000010	huge_phage_1559	375756	Camargo.et.al.2023	Environmental;Terrestrial;Soil	Soil	0.427522	High-quality	High-quality	Yes	/	Yes	Viruses;Duplodnaviria;Heunggongvirae;Uroviricota;Caudoviricetes
IMGVR_UViG_3300015261_000001	huge_phage_1560	238193	Camargo.et.al.2023	Host-associated;Plants;Roots	Plants-related	0.507593	Complete	High-quality	Yes	/	Yes	Viruses;Duplodnaviria;Heunggongvirae;Uroviricota;Caudoviricetes
IMGVR_UViG_3300006141_000001	huge_phage_1565	243188	Camargo.et.al.2023	Host-associated;Mammals;Digestive system	Animal digestive system	0.346835	Complete	High-quality	Yes	/	Yes	Viruses;Duplodnaviria;Heunggongvirae;Uroviricota;Caudoviricetes
IMGVR_UViG_3300035498_000877	huge_phage_1572	289234	Camargo.et.al.2023	Host-associated;Mammals;Digestive system	Animal digestive system	0.297738	High-quality	High-quality	Yes	/	Yes	Viruses;Duplodnaviria;Heunggongvirae;Uroviricota;Caudoviricetes
IMGVR_UViG_3300023181_000025	huge_phage_1581	211168	Camargo.et.al.2023	Environmental;Terrestrial;Plant litter	Others	0.375038	High-quality	High-quality	Yes	/	Yes	Viruses;Duplodnaviria;Heunggongvirae;Uroviricota;Caudoviricetes
IMGVR_UViG_3300042558_004043	huge_phage_1582	310225	Camargo.et.al.2023	Environmental;Aquatic;Freshwater	Freshwater	0.325783	High-quality	High-quality	Yes	/	Yes	Viruses;Duplodnaviria;Heunggongvirae;Uroviricota;Caudoviricetes
IMGVR_UViG_3300027963_000034	huge_phage_1584	251310	Camargo.et.al.2023	Environmental;Aquatic;Freshwater	Freshwater	0.304886	High-quality	High-quality	Yes	/	Yes	Viruses;Duplodnaviria;Heunggongvirae;Uroviricota;Caudoviricetes
IMGVR_UViG_3300032116_000006	huge_phage_1585	249543	Camargo.et.al.2023	Environmental;Aquatic;Freshwater	Freshwater	0.333634	High-quality	High-quality	Yes	/	Yes	Viruses;Duplodnaviria;Heunggongvirae;Uroviricota;Caudoviricetes
IMGVR_UViG_3300028887_000066	huge_phage_1596	356121	Camargo.et.al.2023	Host-associated;Mammals;Digestive system	Animal digestive system	0.36815	High-quality	High-quality	Yes	/	Yes	Viruses;Duplodnaviria;Heunggongvirae;Uroviricota;Caudoviricetes
IMGVR_UViG_3300030515_000001	huge_phage_1599	280297	Camargo.et.al.2023	Host-associated;Plants;Phyllosphere	Plants-related	0.504982	Complete	High-quality	Yes	/	Yes	Viruses;Duplodnaviria;Heunggongvirae;Uroviricota;Caudoviricetes
IMGVR_UViG_3300045988_139809	huge_phage_1601	230142	Camargo.et.al.2023	Host-associated;Mammals: Human;Digestive system	Animal digestive system	0.337709	High-quality	High-quality	Yes	/	Yes	Viruses;Duplodnaviria;Heunggongvirae;Uroviricota;Caudoviricetes
IMGVR_UViG_3300045988_180488	huge_phage_1602	377817	Camargo.et.al.2023	Host-associated;Mammals: Human;Digestive system	Animal digestive system	0.297236	High-quality	High-quality	Yes	/	Yes	Viruses;Duplodnaviria;Heunggongvirae;Uroviricota;Caudoviricetes
IMGVR_UViG_3300010049_000009	huge_phage_1603	367155	Camargo.et.al.2023	Host-associated;Arthropoda: Insects;Digestive system	Animal digestive system	0.33567	Complete	High-quality	Yes	/	Yes	Viruses;Duplodnaviria;Heunggongvirae;Uroviricota;Caudoviricetes
IMGVR_UViG_3300037067_013742	huge_phage_1604	229064	Camargo.et.al.2023	Engineered;Solid waste;Landfill	Landfill	0.454445	High-quality	High-quality	Yes	/	Yes	Viruses;Duplodnaviria;Heunggongvirae;Uroviricota;Caudoviricetes
IMGVR_UViG_3300031134_000004	huge_phage_1609	224654	Camargo.et.al.2023	Host-associated;Plants;Phyllosphere	Plants-related	0.515335	Medium-quality	Genome-fragment	Yes	/	Yes	Viruses;Duplodnaviria;Heunggongvirae;Uroviricota;Caudoviricetes
IMGVR_UViG_3300046000_006872	huge_phage_1615	202972	Camargo.et.al.2023	Environmental;Aquatic;Freshwater	Freshwater	0.394473	Medium-quality	Genome-fragment	Yes	/	Yes	Viruses;Duplodnaviria;Heunggongvirae;Uroviricota;Caudoviricetes
IMGVR_UViG_3300008091_000010	huge_phage_1619	228309	Camargo.et.al.2023	Host-associated;Human;Digestive system	Animal digestive system	0.391176	Complete	High-quality	Yes	/	Yes	Viruses;Duplodnaviria;Heunggongvirae;Uroviricota;Caudoviricetes
IMGVR_UViG_3300026484_000087	huge_phage_1622	206244	Camargo.et.al.2023	Environmental;Aquatic;Marine	Marine	0.297517	Medium-quality	Genome-fragment	Yes	/	Yes	Viruses;Duplodnaviria;Heunggongvirae;Uroviricota;Caudoviricetes
IMGVR_UViG_3300045988_133441	huge_phage_1625	256075	Camargo.et.al.2023	Host-associated;Mammals: Human;Digestive system	Animal digestive system	0.350233	High-quality	High-quality	Yes	/	Yes	Viruses;Duplodnaviria;Heunggongvirae;Uroviricota;Caudoviricetes
IMGVR_UViG_3300035659_000001	huge_phage_1629	261940	Camargo.et.al.2023	Environmental;Aquatic;Freshwater	Freshwater	0.306704	Medium-quality	Genome-fragment	Yes	/	Yes	Viruses;Duplodnaviria;Heunggongvirae;Uroviricota;Caudoviricetes
IMGVR_UViG_3300007171_000004	huge_phage_1630	300536	Camargo.et.al.2023	Environmental;Aquatic;Freshwater	Freshwater	0.328071	High-quality	High-quality	Yes	/	Yes	Viruses;Duplodnaviria;Heunggongvirae;Uroviricota;Caudoviricetes
IMGVR_UViG_3300023296_000874	huge_phage_1636	257533	Camargo.et.al.2023	Environmental;Aquatic;Non-marine Saline and Alkaline	Non-marine Saline and Alkaline	0.595481	Medium-quality	Genome-fragment	Yes	/	Yes	Viruses;Duplodnaviria;Heunggongvirae;Uroviricota;Caudoviricetes
IMGVR_UViG_3300042895_001344	huge_phage_1637	217142	Camargo.et.al.2023	Environmental;Aquatic;Freshwater	Freshwater	0.315701	Medium-quality	Genome-fragment	Yes	/	Yes	Viruses;Duplodnaviria;Heunggongvirae;Uroviricota;Caudoviricetes
IMGVR_UViG_3300041416_000287	huge_phage_1638	240448	Camargo.et.al.2023	Environmental;Terrestrial;Soil	Soil	0.463763	Low-quality	Genome-fragment	Yes	/	Yes	Viruses;Duplodnaviria;Heunggongvirae;Uroviricota;Caudoviricetes
IMGVR_UViG_3300019487_000319	huge_phage_1639	340880	Camargo.et.al.2023	Environmental;Terrestrial;Deep subsurface	Deep subsurface	0.354051	Complete	High-quality	Yes	/	Yes	Viruses;Duplodnaviria;Heunggongvirae;Uroviricota;Caudoviricetes
IMGVR_UViG_3300045049_000270	huge_phage_1644	523572	Camargo.et.al.2023	Host-associated;Plants;Roots	Plants-related	0.420328	High-quality	High-quality	Yes	/	Yes	Viruses;Duplodnaviria;Heunggongvirae;Uroviricota;Caudoviricetes
IMGVR_UViG_3300013947_000020	huge_phage_1647	242497	Camargo.et.al.2023	Host-associated;Mammals;Digestive system	Animal digestive system	0.345166	Medium-quality	Genome-fragment	Yes	/	Yes	Viruses;Duplodnaviria;Heunggongvirae;Uroviricota;Caudoviricetes
IMGVR_UViG_3300023184_004198	huge_phage_1655	212614	Camargo.et.al.2023	Environmental;Aquatic;Freshwater	Freshwater	0.4461	Medium-quality	Genome-fragment	Yes	/	Yes	Viruses;Duplodnaviria;Heunggongvirae;Uroviricota;Caudoviricetes
IMGVR_UViG_3300030098_004828	huge_phage_1659	245646	Camargo.et.al.2023	Environmental;Aquatic;Marine	Marine	0.305464	High-quality	High-quality	Yes	/	Yes	Viruses;Duplodnaviria;Heunggongvirae;Uroviricota;Caudoviricetes
IMGVR_UViG_3300020469_003050	huge_phage_1662	342607	Camargo.et.al.2023	Environmental;Aquatic;Marine	Marine	0.347906	Complete	High-quality	Yes	/	Yes	Viruses;Duplodnaviria;Heunggongvirae;Uroviricota;Caudoviricetes
IMGVR_UViG_3300037502_003770	huge_phage_1663	312694	Camargo.et.al.2023	Environmental;Aquatic;Deep subsurface	Deep subsurface	0.222748	High-quality	High-quality	Yes	/	Yes	Viruses;Duplodnaviria;Heunggongvirae;Uroviricota;Caudoviricetes
IMGVR_UViG_3300010218_000001	huge_phage_1664	322570	Camargo.et.al.2023	Engineered;Lab enrichment;Unclassified	Others	0.455808	Complete	High-quality	Yes	/	Yes	Viruses;Duplodnaviria;Heunggongvirae;Uroviricota;Caudoviricetes
IMGVR_UViG_3300028549_000365	huge_phage_1665	222081	Camargo.et.al.2023	Environmental;Aquatic;Freshwater	Freshwater	0.312219	Medium-quality	Genome-fragment	Yes	/	Yes	Viruses;Duplodnaviria;Heunggongvirae;Uroviricota;Caudoviricetes
IMGVR_UViG_3300043425_001539	huge_phage_1667	238475	Camargo.et.al.2023	Environmental;Aquatic;Freshwater	Freshwater	0.318968	Medium-quality	Genome-fragment	Yes	/	Yes	Viruses;Duplodnaviria;Heunggongvirae;Uroviricota;Caudoviricetes
IMGVR_UViG_3300028172_000151	huge_phage_1668	246713	Camargo.et.al.2023	Environmental;Terrestrial;Soil	Soil	0.543125	High-quality	High-quality	Yes	/	Yes	Viruses;Duplodnaviria;Heunggongvirae;Uroviricota;Caudoviricetes
IMGVR_UViG_3300008133_000007	huge_phage_1671	227129	Camargo.et.al.2023	Host-associated;Human;Digestive system	Animal digestive system	0.391368	Complete	High-quality	Yes	/	Yes	Viruses;Duplodnaviria;Heunggongvirae;Uroviricota;Caudoviricetes
IMGVR_UViG_3300045594_000116	huge_phage_1672	229508	Camargo.et.al.2023	Engineered;Bioreactor;Anaerobic	Bioreactor	0.389015	High-quality	High-quality	Yes	/	Yes	Viruses;Duplodnaviria;Heunggongvirae;Uroviricota;Caudoviricetes
IMGVR_UViG_3300031998_000001	huge_phage_1674	387654	Camargo.et.al.2023	Host-associated;Mammals;Digestive system	Animal digestive system	0.493502	High-quality	High-quality	Yes	/	Yes	Viruses;Duplodnaviria;Heunggongvirae;Uroviricota;Caudoviricetes
IMGVR_UViG_3300031999_000001	huge_phage_1683	200057	Camargo.et.al.2023	Environmental;Aquatic;Freshwater	Freshwater	0.281205	Medium-quality	Genome-fragment	Yes	/	Yes	Viruses;Duplodnaviria;Heunggongvirae;Uroviricota;Caudoviricetes
IMGVR_UViG_3300033463_000011	huge_phage_1684	200233	Camargo.et.al.2023	Host-associated;Mammals;Digestive system	Animal digestive system	0.346162	High-quality	High-quality	Yes	/	Yes	Viruses;Duplodnaviria;Heunggongvirae;Uroviricota;Caudoviricetes
IMGVR_UViG_3300024344_003081	huge_phage_1687	237560	Camargo.et.al.2023	Environmental;Aquatic;Marine	Marine	0.311071	High-quality	High-quality	Yes	/	Yes	Viruses;Duplodnaviria;Heunggongvirae;Uroviricota;Caudoviricetes
IMGVR_UViG_3300027734_000034	huge_phage_1688	363713	Camargo.et.al.2023	Environmental;Aquatic;Freshwater	Freshwater	0.378351	High-quality	High-quality	Yes	/	Yes	Viruses;Duplodnaviria;Heunggongvirae;Uroviricota;Caudoviricetes
IMGVR_UViG_3300033463_000010	huge_phage_1691	213231	Camargo.et.al.2023	Host-associated;Mammals;Digestive system	Animal digestive system	0.47669	High-quality	High-quality	Yes	/	Yes	Viruses;Duplodnaviria;Heunggongvirae;Uroviricota;Caudoviricetes
IMGVR_UViG_3300045988_171246	huge_phage_1693	209566	Camargo.et.al.2023	Host-associated;Mammals: Human;Digestive system	Animal digestive system	0.275178	Medium-quality	Genome-fragment	Yes	/	Yes	Viruses;Duplodnaviria;Heunggongvirae;Uroviricota;Caudoviricetes
IMGVR_UViG_3300047548_001236	huge_phage_1696	282855	Camargo.et.al.2023	Environmental;Aquatic;Freshwater	Freshwater	0.454388	High-quality	High-quality	Yes	/	Yes	Viruses;Duplodnaviria;Heunggongvirae;Uroviricota;Caudoviricetes
IMGVR_UViG_3300029288_000065	huge_phage_1699	233959	Camargo.et.al.2023	Engineered;Solid waste;Landfill	Landfill	0.396223	Medium-quality	Genome-fragment	Yes	/	Yes	Viruses;Duplodnaviria;Heunggongvirae;Uroviricota;Caudoviricetes
IMGVR_UViG_3300001687_000010	huge_phage_1700	213371	Camargo.et.al.2023	Environmental;Aquatic;Marine	Marine	0.378102	High-quality	High-quality	Yes	/	Yes	Viruses;Duplodnaviria;Heunggongvirae;Uroviricota;Caudoviricetes
IMGVR_UViG_3300028840_008160	huge_phage_1701	329800	Camargo.et.al.2023	Environmental;Aquatic;Marine	Marine	0.349227	Medium-quality	Genome-fragment	Yes	/	Yes	Viruses;Duplodnaviria;Heunggongvirae;Uroviricota;Caudoviricetes
IMGVR_UViG_3300016649_000355	huge_phage_1703	252478	Camargo.et.al.2023	Environmental;Aquatic;Freshwater	Freshwater	0.377452	Medium-quality	Genome-fragment	Yes	/	Yes	Viruses;Duplodnaviria;Heunggongvirae;Uroviricota;Caudoviricetes
IMGVR_UViG_3300023174_005338	huge_phage_1704	337119	Camargo.et.al.2023	Environmental;Aquatic;Freshwater	Freshwater	0.462172	Complete	High-quality	Yes	/	Yes	Viruses;Duplodnaviria;Heunggongvirae;Uroviricota;Caudoviricetes
IMGVR_UViG_3300025030_000042	huge_phage_1706	210958	Camargo.et.al.2023	Environmental;Aquatic;Deep subsurface	Deep subsurface	0.338195	High-quality	High-quality	Yes	/	Yes	Viruses;Duplodnaviria;Heunggongvirae;Uroviricota;Caudoviricetes
IMGVR_UViG_3300044972_002389	huge_phage_1707	328603	Camargo.et.al.2023	Environmental;Aquatic;Freshwater	Freshwater	0.456152	Medium-quality	Genome-fragment	Yes	/	Yes	Viruses;Duplodnaviria;Heunggongvirae;Uroviricota;Caudoviricetes
IMGVR_UViG_3300037461_000428	huge_phage_1711	213094	Camargo.et.al.2023	Environmental;Aquatic;Freshwater	Freshwater	0.316851	Complete	High-quality	Yes	/	Yes	Viruses;Duplodnaviria;Heunggongvirae;Uroviricota;Caudoviricetes
IMGVR_UViG_3300047393_000100	huge_phage_1714	235722	Camargo.et.al.2023	Environmental;Aquatic;Freshwater	Freshwater	0.3144	Medium-quality	Genome-fragment	Yes	/	Yes	Viruses;Duplodnaviria;Heunggongvirae;Uroviricota;Caudoviricetes
IMGVR_UViG_3300008155_000133	huge_phage_1716	321498	Camargo.et.al.2023	Host-associated;Human;Digestive system	Animal digestive system	0.512007	High-quality	High-quality	Yes	/	Yes	Viruses;Duplodnaviria;Heunggongvirae;Uroviricota;Caudoviricetes
IMGVR_UViG_3300032242_003291	huge_phage_1717	317259	Camargo.et.al.2023	Environmental;Aquatic;Freshwater	Freshwater	0.329207	High-quality	High-quality	Yes	/	Yes	Viruses;Duplodnaviria;Heunggongvirae;Uroviricota;Caudoviricetes
IMGVR_UViG_3300034161_000008	huge_phage_1718	218436	Camargo.et.al.2023	Environmental;Terrestrial;Soil	Soil	0.527367	Complete	High-quality	Yes	/	Yes	Viruses;Duplodnaviria;Heunggongvirae;Uroviricota;Caudoviricetes
IMGVR_UViG_3300022661_000051	huge_phage_1719	230803	Camargo.et.al.2023	Host-associated;Mammals;Digestive system	Animal digestive system	0.351534	High-quality	High-quality	Yes	/	Yes	Viruses;Duplodnaviria;Heunggongvirae;Uroviricota;Caudoviricetes
IMGVR_UViG_3300026737_000001	huge_phage_1726	212659	Camargo.et.al.2023	Environmental;Aquatic;Deep subsurface	Deep subsurface	0.340964	High-quality	High-quality	Yes	/	Yes	Viruses;Duplodnaviria;Heunggongvirae;Uroviricota;Caudoviricetes
IMGVR_UViG_3300042350_003801	huge_phage_1728	250336	Camargo.et.al.2023	Environmental;Aquatic;Freshwater	Freshwater	0.381076	Complete	High-quality	Yes	/	Yes	Viruses;Duplodnaviria;Heunggongvirae;Uroviricota;Caudoviricetes
IMGVR_UViG_3300045988_170107	huge_phage_1731	214252	Camargo.et.al.2023	Host-associated;Mammals: Human;Digestive system	Animal digestive system	0.329388	High-quality	High-quality	Yes	/	Yes	Viruses;Duplodnaviria;Heunggongvirae;Uroviricota;Caudoviricetes
IMGVR_UViG_3300028734_000370	huge_phage_1733	239672	Camargo.et.al.2023	Environmental;Terrestrial;Soil	Soil	0.242986	Medium-quality	Genome-fragment	Yes	/	Yes	Viruses;Duplodnaviria;Heunggongvirae;Uroviricota;Caudoviricetes
IMGVR_UViG_3300045988_181099	huge_phage_1735	367385	Camargo.et.al.2023	Host-associated;Mammals: Human;Digestive system	Animal digestive system	0.297538	High-quality	High-quality	Yes	/	Yes	Viruses;Duplodnaviria;Heunggongvirae;Uroviricota;Caudoviricetes
IMGVR_UViG_3300028048_000045	huge_phage_1738	276071	Camargo.et.al.2023	Host-associated;Mammals;Digestive system	Animal digestive system	0.293827	High-quality	High-quality	Yes	/	Yes	Viruses;Duplodnaviria;Heunggongvirae;Uroviricota;Caudoviricetes
IMGVR_UViG_3300010369_000001	huge_phage_1740	225448	Camargo.et.al.2023	Host-associated;Arthropoda: Insects;Digestive system	Animal digestive system	0.407961	Complete	High-quality	Yes	/	Yes	Viruses;Duplodnaviria;Heunggongvirae;Uroviricota;Caudoviricetes
IMGVR_UViG_3300036763_000064	huge_phage_1743	241706	Camargo.et.al.2023	Engineered;WWTP;Wastewater	WWTP	0.390441	Complete	High-quality	Yes	/	Yes	Viruses;Duplodnaviria;Heunggongvirae;Uroviricota;Caudoviricetes
IMGVR_UViG_3300008556_000003	huge_phage_1746	227762	Camargo.et.al.2023	Host-associated;Human;Digestive system	Animal digestive system	0.324764	Complete	High-quality	Yes	/	Yes	Viruses;Duplodnaviria;Heunggongvirae;Uroviricota;Caudoviricetes
IMGVR_UViG_3300023179_004209	huge_phage_1748	295831	Camargo.et.al.2023	Environmental;Aquatic;Freshwater	Freshwater	0.31712	High-quality	High-quality	Yes	/	Yes	Viruses;Duplodnaviria;Heunggongvirae;Uroviricota;Caudoviricetes
IMGVR_UViG_3300025066_000007	huge_phage_1749	214028	Camargo.et.al.2023	Environmental;Aquatic;Marine	Marine	0.417464	Medium-quality	Genome-fragment	Yes	/	Yes	Viruses;Duplodnaviria;Heunggongvirae;Uroviricota;Caudoviricetes
IMGVR_UViG_3300032318_002198	huge_phage_1751	332457	Camargo.et.al.2023	Environmental;Aquatic;Freshwater	Freshwater	0.361463	Medium-quality	Genome-fragment	Yes	/	Yes	Viruses;Duplodnaviria;Heunggongvirae;Uroviricota;Caudoviricetes
IMGVR_UViG_3300045988_166581	huge_phage_1754	221842	Camargo.et.al.2023	Host-associated;Mammals: Human;Digestive system	Animal digestive system	0.324731	High-quality	High-quality	Yes	/	Yes	Viruses;Duplodnaviria;Heunggongvirae;Uroviricota;Caudoviricetes
IMGVR_UViG_3300042905_002309	huge_phage_1755	248016	Camargo.et.al.2023	Environmental;Aquatic;Freshwater	Freshwater	0.341059	High-quality	High-quality	Yes	/	Yes	Viruses;Duplodnaviria;Heunggongvirae;Uroviricota;Caudoviricetes
IMGVR_UViG_3300027917_004314	huge_phage_1756	260671	Camargo.et.al.2023	Environmental;Aquatic;Marine	Marine	0.41387	High-quality	High-quality	Yes	/	Yes	Viruses;Duplodnaviria;Heunggongvirae;Uroviricota;Caudoviricetes
IMGVR_UViG_3300024272_002379	huge_phage_1759	213329	Camargo.et.al.2023	Host-associated;Mammals;Digestive system	Animal digestive system	0.343244	High-quality	High-quality	Yes	/	Yes	Viruses;Duplodnaviria;Heunggongvirae;Uroviricota;Caudoviricetes
IMGVR_UViG_3300010430_000003	huge_phage_1763	210326	Camargo.et.al.2023	Environmental;Aquatic;Marine	Marine	0.367116	Complete	High-quality	Yes	/	Yes	Viruses;Duplodnaviria;Heunggongvirae;Uroviricota;Caudoviricetes
IMGVR_UViG_3300040801_002079	huge_phage_1765	316801	Camargo.et.al.2023	Environmental;Aquatic;Marine	Marine	0.394355	Complete	High-quality	Yes	/	Yes	Viruses;Duplodnaviria;Heunggongvirae;Uroviricota;Caudoviricetes
IMGVR_UViG_3300020576_002947	huge_phage_1766	239691	Camargo.et.al.2023	Engineered;WWTP;Activated Sludge	WWTP	0.379055	High-quality	High-quality	Yes	/	Yes	Viruses;Duplodnaviria;Heunggongvirae;Uroviricota;Caudoviricetes
IMGVR_UViG_3300018080_000097	huge_phage_1770	398071	Camargo.et.al.2023	Environmental;Aquatic;Non-marine Saline and Alkaline	Non-marine Saline and Alkaline	0.483853	Complete	High-quality	Yes	/	Yes	Viruses;Duplodnaviria;Heunggongvirae;Uroviricota;Caudoviricetes
IMGVR_UViG_3300048924_000100	huge_phage_1771	214198	Camargo.et.al.2023	Host-associated;Plants;Roots	Plants-related	0.511517	High-quality	High-quality	Yes	/	Yes	Viruses;Duplodnaviria;Heunggongvirae;Uroviricota;Caudoviricetes
IMGVR_UViG_3300020165_003716	huge_phage_1773	227354	Camargo.et.al.2023	Environmental;Aquatic;Marine	Marine	0.425244	Low-quality	Genome-fragment	Yes	/	Yes	Viruses;Duplodnaviria;Heunggongvirae;Uroviricota;Caudoviricetes
IMGVR_UViG_3300024346_000005	huge_phage_1775	232395	Camargo.et.al.2023	Environmental;Aquatic;Marine	Marine	0.368734	High-quality	High-quality	Yes	/	Yes	Viruses;Duplodnaviria;Heunggongvirae;Uroviricota;Caudoviricetes
IMGVR_UViG_3300028422_000844	huge_phage_1776	371739	Camargo.et.al.2023	Environmental;Aquatic;Marine	Marine	0.594412	Medium-quality	Genome-fragment	Yes	/	Yes	Viruses;Duplodnaviria;Heunggongvirae;Uroviricota;Caudoviricetes
IMGVR_UViG_3300000553_000004	huge_phage_1777	214733	Camargo.et.al.2023	Environmental;Aquatic;Freshwater	Freshwater	0.381204	Medium-quality	Genome-fragment	Yes	/	Yes	Viruses;Duplodnaviria;Heunggongvirae;Uroviricota;Caudoviricetes
IMGVR_UViG_3300025840_004398	huge_phage_1780	200815	Camargo.et.al.2023	Environmental;Aquatic;Marine	Marine	0.317974	Medium-quality	Genome-fragment	Yes	/	Yes	Viruses;Duplodnaviria;Heunggongvirae;Uroviricota;Caudoviricetes
IMGVR_UViG_3300006204_000002	huge_phage_1784	283941	Camargo.et.al.2023	Host-associated;Mammals;Digestive system	Animal digestive system	0.331393	Complete	High-quality	Yes	/	Yes	Viruses;Duplodnaviria;Heunggongvirae;Uroviricota;Caudoviricetes
IMGVR_UViG_3300020438_000007	huge_phage_1795	230739	Camargo.et.al.2023	Environmental;Aquatic;Marine	Marine	0.3897	High-quality	High-quality	Yes	/	Yes	Viruses;Duplodnaviria;Heunggongvirae;Uroviricota;Caudoviricetes
IMGVR_UViG_3300032046_000001	huge_phage_1798	312420	Camargo.et.al.2023	Environmental;Aquatic;Freshwater	Freshwater	0.286352	Complete	High-quality	Yes	/	Yes	Viruses;Duplodnaviria;Heunggongvirae;Uroviricota;Caudoviricetes
IMGVR_UViG_3300025889_000071	huge_phage_1799	215149	Camargo.et.al.2023	Environmental;Aquatic;Marine	Marine	0.359899	High-quality	High-quality	Yes	/	Yes	Viruses;Duplodnaviria;Heunggongvirae;Uroviricota;Caudoviricetes
IMGVR_UViG_3300024259_000011	huge_phage_1800	202143	Camargo.et.al.2023	Environmental;Aquatic;Marine	Marine	0.473853	High-quality	High-quality	Yes	/	Yes	Viruses;Duplodnaviria;Heunggongvirae;Uroviricota;Caudoviricetes
IMGVR_UViG_3300045988_059906	huge_phage_1804	209068	Camargo.et.al.2023	Host-associated;Mammals: Human;Digestive system	Animal digestive system	0.349078	High-quality	High-quality	Yes	/	Yes	Viruses;Duplodnaviria;Heunggongvirae;Uroviricota;Caudoviricetes
IMGVR_UViG_3300031414_000004	huge_phage_1811	246341	Camargo.et.al.2023	Host-associated;Plants;Phyllosphere	Plants-related	0.511819	High-quality	High-quality	Yes	/	Yes	Viruses;Duplodnaviria;Heunggongvirae;Uroviricota;Caudoviricetes
IMGVR_UViG_3300035670_000009	huge_phage_1812	203910	Camargo.et.al.2023	Environmental;Aquatic;Deep subsurface	Deep subsurface	0.577245	Complete	High-quality	Yes	/	Yes	Viruses;Duplodnaviria;Heunggongvirae;Uroviricota;Caudoviricetes
IMGVR_UViG_3300013121_000012	huge_phage_1813	206805	Camargo.et.al.2023	Engineered;WWTP;Activated Sludge	WWTP	0.383675	Medium-quality	Genome-fragment	Yes	/	Yes	Viruses;Duplodnaviria;Heunggongvirae;Uroviricota;Caudoviricetes
IMGVR_UViG_3300008261_000001	huge_phage_1814	290179	Camargo.et.al.2023	Environmental;Aquatic;Freshwater	Freshwater	0.473432	High-quality	High-quality	Yes	/	Yes	Viruses;Duplodnaviria;Heunggongvirae;Uroviricota;Caudoviricetes
IMGVR_UViG_3300030117_007612	huge_phage_1817	203368	Camargo.et.al.2023	Environmental;Aquatic;Marine	Marine	0.421659	High-quality	High-quality	Yes	/	Yes	Viruses;Duplodnaviria;Heunggongvirae;Uroviricota;Caudoviricetes
IMGVR_UViG_3300032931_001151	huge_phage_1821	214200	Camargo.et.al.2023	Environmental;Aquatic;Freshwater	Freshwater	0.327941	Medium-quality	Genome-fragment	Yes	/	Yes	Viruses;Duplodnaviria;Heunggongvirae;Uroviricota;Caudoviricetes
IMGVR_UViG_3300033463_000008	huge_phage_1823	221920	Camargo.et.al.2023	Host-associated;Mammals;Digestive system	Animal digestive system	0.49188	Medium-quality	Genome-fragment	Yes	/	Yes	Viruses;Duplodnaviria;Heunggongvirae;Uroviricota;Caudoviricetes
IMGVR_UViG_3300029305_012040	huge_phage_1825	212946	Camargo.et.al.2023	Host-associated;Mammals;Digestive system	Animal digestive system	0.340069	High-quality	High-quality	Yes	/	Yes	Viruses;Duplodnaviria;Heunggongvirae;Uroviricota;Caudoviricetes
IMGVR_UViG_3300010163_000002	huge_phage_1828	248905	Camargo.et.al.2023	Host-associated;Mammals;Digestive system	Animal digestive system	0.326779	Medium-quality	Genome-fragment	Yes	/	Yes	Viruses;Duplodnaviria;Heunggongvirae;Uroviricota;Caudoviricetes
IMGVR_UViG_3300045988_147211	huge_phage_1831	208310	Camargo.et.al.2023	Host-associated;Mammals: Human;Digestive system	Animal digestive system	0.334804	High-quality	High-quality	Yes	/	Yes	Viruses;Duplodnaviria;Heunggongvirae;Uroviricota;Caudoviricetes
IMGVR_UViG_3300006248_000002	huge_phage_1835	276740	Camargo.et.al.2023	Host-associated;Human;Digestive system	Animal digestive system	0.336793	High-quality	High-quality	Yes	/	Yes	Viruses;Duplodnaviria;Heunggongvirae;Uroviricota;Caudoviricetes
IMGVR_UViG_3300029305_003510	huge_phage_1841	230855	Camargo.et.al.2023	Host-associated;Mammals;Digestive system	Animal digestive system	0.413905	Medium-quality	Genome-fragment	Yes	/	Yes	Viruses;Duplodnaviria;Heunggongvirae;Uroviricota;Caudoviricetes
IMGVR_UViG_3300032116_000002	huge_phage_1844	366837	Camargo.et.al.2023	Environmental;Aquatic;Freshwater	Freshwater	0.366329	High-quality	High-quality	Yes	/	Yes	Viruses;Duplodnaviria;Heunggongvirae;Uroviricota;Caudoviricetes
IMGVR_UViG_3300031418_000003	huge_phage_1845	266776	Camargo.et.al.2023	Host-associated;Plants;Phyllosphere	Plants-related	0.440849	High-quality	High-quality	Yes	/	Yes	Viruses;Duplodnaviria;Heunggongvirae;Uroviricota;Caudoviricetes
IMGVR_UViG_3300022902_000004	huge_phage_1849	318267	Camargo.et.al.2023	Environmental;Aquatic;Marine	Marine	0.4627	High-quality	High-quality	Yes	/	Yes	Viruses;Duplodnaviria;Heunggongvirae;Uroviricota;Caudoviricetes
IMGVR_UViG_3300007940_000004	huge_phage_1850	291466	Camargo.et.al.2023	Host-associated;Human;Digestive system	Animal digestive system	0.277843	High-quality	High-quality	Yes	/	Yes	Viruses;Duplodnaviria;Heunggongvirae;Uroviricota;Caudoviricetes
IMGVR_UViG_3300048927_000302	huge_phage_1851	243672	Camargo.et.al.2023	Host-associated;Plants;Roots	Plants-related	0.541654	High-quality	High-quality	Yes	/	Yes	Viruses;Duplodnaviria;Heunggongvirae;Uroviricota;Caudoviricetes
IMGVR_UViG_3300032296_003307	huge_phage_1852	268739	Camargo.et.al.2023	Environmental;Aquatic;Freshwater	Freshwater	0.324017	High-quality	High-quality	Yes	/	Yes	Viruses;Duplodnaviria;Heunggongvirae;Uroviricota;Caudoviricetes
IMGVR_UViG_3300026077_000001	huge_phage_1854	227935	Camargo.et.al.2023	Environmental;Aquatic;Marine	Marine	0.391756	High-quality	High-quality	Yes	/	Yes	Viruses;Duplodnaviria;Heunggongvirae;Uroviricota;Caudoviricetes
IMGVR_UViG_3300021426_000001	huge_phage_1855	262475	Camargo.et.al.2023	Host-associated;Mammals;Digestive system	Animal digestive system	0.486523	Complete	High-quality	Yes	/	Yes	Viruses;Duplodnaviria;Heunggongvirae;Uroviricota;Caudoviricetes
IMGVR_UViG_3300036715_003906	huge_phage_1857	251474	Camargo.et.al.2023	Environmental;Aquatic;Freshwater	Freshwater	0.681259	Medium-quality	Genome-fragment	Yes	/	Yes	Viruses;Duplodnaviria;Heunggongvirae;Uroviricota;Caudoviricetes
IMGVR_UViG_3300045988_134803	huge_phage_1859	243610	Camargo.et.al.2023	Host-associated;Mammals: Human;Digestive system	Animal digestive system	0.33708	Complete	High-quality	Yes	/	Yes	Viruses;Duplodnaviria;Heunggongvirae;Uroviricota;Caudoviricetes
IMGVR_UViG_3300044695_004869	huge_phage_1864	234714	Camargo.et.al.2023	Environmental;Aquatic;Freshwater	Freshwater	0.323845	Medium-quality	Genome-fragment	Yes	/	Yes	Viruses;Duplodnaviria;Heunggongvirae;Uroviricota;Caudoviricetes
IMGVR_UViG_3300037418_002962	huge_phage_1865	243684	Camargo.et.al.2023	Host-associated;Plants;Roots	Plants-related	0.341894	High-quality	High-quality	Yes	/	Yes	Viruses;Duplodnaviria;Heunggongvirae;Uroviricota;Caudoviricetes
IMGVR_UViG_3300049988_000124	huge_phage_1867	307821	Camargo.et.al.2023	Host-associated;Plants;Phyllosphere	Plants-related	0.52194	High-quality	High-quality	Yes	/	Yes	Viruses;Duplodnaviria;Heunggongvirae;Uroviricota;Caudoviricetes
IMGVR_UViG_3300033074_002003	huge_phage_1870	329329	Camargo.et.al.2023	Engineered;WWTP;Wastewater	WWTP	0.558214	High-quality	High-quality	Yes	/	Yes	Viruses;Duplodnaviria;Heunggongvirae;Uroviricota;Caudoviricetes
IMGVR_UViG_3300045988_158001	huge_phage_1871	247792	Camargo.et.al.2023	Host-associated;Mammals: Human;Digestive system	Animal digestive system	0.315285	Complete	High-quality	Yes	/	Yes	Viruses;Duplodnaviria;Heunggongvirae;Uroviricota;Caudoviricetes
IMGVR_UViG_3300020429_000529	huge_phage_1873	498568	Camargo.et.al.2023	Environmental;Aquatic;Marine	Marine	0.517795	Complete	High-quality	Yes	/	Yes	Viruses;Duplodnaviria;Heunggongvirae;Uroviricota;Caudoviricetes
IMGVR_UViG_3300047095_000752	huge_phage_1874	245225	Camargo.et.al.2023	Environmental;Aquatic;Freshwater	Freshwater	0.347868	Medium-quality	Genome-fragment	Yes	/	Yes	Viruses;Duplodnaviria;Heunggongvirae;Uroviricota;Caudoviricetes
IMGVR_UViG_3300027834_000005	huge_phage_1878	347232	Camargo.et.al.2023	Environmental;Aquatic;Marine	Marine	0.400467	Medium-quality	Genome-fragment	Yes	/	Yes	Viruses;Duplodnaviria;Heunggongvirae;Uroviricota;Caudoviricetes
IMGVR_UViG_3300031784_000003	huge_phage_1880	224327	Camargo.et.al.2023	Environmental;Aquatic;Freshwater	Freshwater	0.285017	Medium-quality	Genome-fragment	Yes	/	Yes	Viruses;Duplodnaviria;Heunggongvirae;Uroviricota;Caudoviricetes
IMGVR_UViG_3300036770_004723	huge_phage_1881	286584	Camargo.et.al.2023	Environmental;Aquatic;Deep subsurface	Deep subsurface	0.346474	High-quality	High-quality	Yes	/	Yes	Viruses;Duplodnaviria;Heunggongvirae;Uroviricota;Caudoviricetes
IMGVR_UViG_3300037851_000345	huge_phage_1889	222974	Camargo.et.al.2023	Environmental;Aquatic;Thermal springs	Others	0.412797	Complete	High-quality	Yes	/	Yes	Viruses;Duplodnaviria;Heunggongvirae;Uroviricota;Caudoviricetes
IMGVR_UViG_3300029374_000001	huge_phage_1892	260160	Camargo.et.al.2023	Host-associated;Human;Digestive system	Animal digestive system	0.329124	Complete	High-quality	Yes	/	Yes	Viruses;Duplodnaviria;Heunggongvirae;Uroviricota;Caudoviricetes
IMGVR_UViG_3300035156_000206	huge_phage_1897	291967	Camargo.et.al.2023	Environmental;Terrestrial;Soil	Soil	0.483979	Medium-quality	Genome-fragment	Yes	/	Yes	Viruses;Duplodnaviria;Heunggongvirae;Uroviricota;Caudoviricetes
IMGVR_UViG_3300011890_000001	huge_phage_1898	269065	Camargo.et.al.2023	Engineered;Built environment;City	Built environment	0.552032	Medium-quality	Genome-fragment	Yes	/	Yes	Viruses;Duplodnaviria;Heunggongvirae;Uroviricota;Caudoviricetes
IMGVR_UViG_3300038393_000832	huge_phage_1900	242456	Camargo.et.al.2023	Environmental;Terrestrial;Soil	Soil	0.380931	Complete	High-quality	Yes	/	Yes	Viruses;Duplodnaviria;Heunggongvirae;Uroviricota;Caudoviricetes
IMGVR_UViG_3300030385_002649	huge_phage_1906	370804	Camargo.et.al.2023	Environmental;Aquatic;Marine	Marine	0.454094	Complete	High-quality	Yes	/	Yes	Viruses;Duplodnaviria;Heunggongvirae;Uroviricota;Caudoviricetes
IMGVR_UViG_3300036770_007539	huge_phage_1907	301007	Camargo.et.al.2023	Environmental;Aquatic;Deep subsurface	Deep subsurface	0.354444	High-quality	High-quality	Yes	/	Yes	Viruses;Duplodnaviria;Heunggongvirae;Uroviricota;Caudoviricetes
IMGVR_UViG_3300019458_000021	huge_phage_1909	237379	Camargo.et.al.2023	Environmental;Terrestrial;Deep subsurface	Deep subsurface	0.46058	Medium-quality	Genome-fragment	Yes	/	Yes	Viruses;Duplodnaviria;Heunggongvirae;Uroviricota;Caudoviricetes
IMGVR_UViG_3300028171_000090	huge_phage_1914	223016	Camargo.et.al.2023	Environmental;Terrestrial;Soil	Soil	0.349831	High-quality	High-quality	Yes	/	Yes	Viruses;Duplodnaviria;Heunggongvirae;Uroviricota;Caudoviricetes
IMGVR_UViG_3300049460_000121	huge_phage_1916	267467	Camargo.et.al.2023	Host-associated;Plants;Roots	Plants-related	0.536242	High-quality	High-quality	Yes	/	Yes	Viruses;Duplodnaviria;Heunggongvirae;Uroviricota;Caudoviricetes
IMGVR_UViG_3300029528_000001	huge_phage_1917	214141	Camargo.et.al.2023	Host-associated;Human;Digestive system	Animal digestive system	0.330068	High-quality	High-quality	Yes	/	Yes	Viruses;Duplodnaviria;Heunggongvirae;Uroviricota;Caudoviricetes
IMGVR_UViG_3300026518_000006	huge_phage_1920	235593	Camargo.et.al.2023	Environmental;Aquatic;Marine	Marine	0.318622	Medium-quality	Genome-fragment	Yes	/	Yes	Viruses;Duplodnaviria;Heunggongvirae;Uroviricota;Caudoviricetes
IMGVR_UViG_3300042922_000542	huge_phage_1921	246147	Camargo.et.al.2023	Environmental;Terrestrial;Soil	Soil	0.302011	Complete	High-quality	Yes	/	Yes	Viruses;Duplodnaviria;Heunggongvirae;Uroviricota;Caudoviricetes
IMGVR_UViG_3300034062_005626	huge_phage_1922	208465	Camargo.et.al.2023	Environmental;Aquatic;Freshwater	Freshwater	0.310618	Medium-quality	Genome-fragment	Yes	/	Yes	Viruses;Duplodnaviria;Heunggongvirae;Uroviricota;Caudoviricetes
IMGVR_UViG_3300037501_000255	huge_phage_1927	367953	Camargo.et.al.2023	Environmental;Aquatic;Thermal springs	Others	0.475025	Medium-quality	Genome-fragment	Yes	/	Yes	Viruses;Duplodnaviria;Heunggongvirae;Uroviricota;Caudoviricetes
IMGVR_UViG_3300024252_000005	huge_phage_1933	255678	Camargo.et.al.2023	Environmental;Aquatic;Marine	Marine	0.317251	High-quality	High-quality	Yes	/	Yes	Viruses;Duplodnaviria;Heunggongvirae;Uroviricota;Caudoviricetes
IMGVR_UViG_3300037484_000235	huge_phage_1934	252521	Camargo.et.al.2023	Environmental;Aquatic;Floodplain	Others	0.560052	Medium-quality	Genome-fragment	Yes	/	Yes	Viruses;Duplodnaviria;Heunggongvirae;Uroviricota;Caudoviricetes
IMGVR_UViG_3300005077_000001	huge_phage_1936	256335	Camargo.et.al.2023	Environmental;Aquatic;Freshwater	Freshwater	0.33203	High-quality	High-quality	Yes	/	Yes	Viruses;Duplodnaviria;Heunggongvirae;Uroviricota;Caudoviricetes
IMGVR_UViG_3300014583_000001	huge_phage_1937	241249	Camargo.et.al.2023	Host-associated;Mammals: Human;Digestive system	Animal digestive system	0.302994	High-quality	High-quality	Yes	/	Yes	Viruses;Duplodnaviria;Heunggongvirae;Uroviricota;Caudoviricetes
IMGVR_UViG_3300033402_000312	huge_phage_1942	436173	Camargo.et.al.2023	Environmental;Terrestrial;Soil	Soil	0.579169	High-quality	High-quality	Yes	/	Yes	Viruses;Duplodnaviria;Heunggongvirae;Uroviricota;Caudoviricetes
IMGVR_UViG_3300045988_184003	huge_phage_1946	225290	Camargo.et.al.2023	Host-associated;Mammals: Human;Digestive system	Animal digestive system	0.340512	Medium-quality	Genome-fragment	Yes	/	Yes	Viruses;Duplodnaviria;Heunggongvirae;Uroviricota;Caudoviricetes
IMGVR_UViG_3300042009_000026	huge_phage_1950	317367	Camargo.et.al.2023	Host-associated;Plants;Roots	Plants-related	0.455381	Complete	High-quality	Yes	/	Yes	Viruses;Duplodnaviria;Heunggongvirae;Uroviricota;Caudoviricetes
IMGVR_UViG_3300027782_000030	huge_phage_1954	200570	Camargo.et.al.2023	Environmental;Aquatic;Freshwater	Freshwater	0.358782	Medium-quality	Genome-fragment	Yes	/	Yes	Viruses;Duplodnaviria;Heunggongvirae;Uroviricota;Caudoviricetes
IMGVR_UViG_3300021399_000100	huge_phage_1958	209600	Camargo.et.al.2023	Host-associated;Mammals;Digestive system	Animal digestive system	0.378101	Complete	High-quality	Yes	/	Yes	Viruses;Duplodnaviria;Heunggongvirae;Uroviricota;Caudoviricetes
IMGVR_UViG_3300008474_000001	huge_phage_1959	277709	Camargo.et.al.2023	Host-associated;Human;Digestive system	Animal digestive system	0.370424	Complete	High-quality	Yes	/	Yes	Viruses;Duplodnaviria;Heunggongvirae;Uroviricota;Caudoviricetes
IMGVR_UViG_3300028591_000082	huge_phage_1966	222619	Camargo.et.al.2023	Host-associated;Mammals;Digestive system	Animal digestive system	0.310647	High-quality	High-quality	Yes	/	Yes	Viruses;Duplodnaviria;Heunggongvirae;Uroviricota;Caudoviricetes
IMGVR_UViG_3300025858_000011	huge_phage_1967	204355	Camargo.et.al.2023	Engineered;Bioreactor;Anaerobic	Bioreactor	0.362722	High-quality	High-quality	Yes	/	Yes	Viruses;Duplodnaviria;Heunggongvirae;Uroviricota;Caudoviricetes
IMGVR_UViG_3300008108_000006	huge_phage_1970	271422	Camargo.et.al.2023	Environmental;Aquatic;Freshwater	Freshwater	0.325994	Medium-quality	Genome-fragment	Yes	/	Yes	Viruses;Duplodnaviria;Heunggongvirae;Uroviricota;Caudoviricetes
IMGVR_UViG_3300009372_002127	huge_phage_1971	200819	Camargo.et.al.2023	Environmental;Aquatic;Marine	Marine	0.336482	Complete	High-quality	Yes	/	Yes	Viruses;Duplodnaviria;Heunggongvirae;Uroviricota;Caudoviricetes
IMGVR_UViG_3300027896_005002	huge_phage_1976	416029	Camargo.et.al.2023	Environmental;Aquatic;Freshwater	Freshwater	0.310743	Medium-quality	Genome-fragment	Yes	/	Yes	Viruses;Duplodnaviria;Heunggongvirae;Uroviricota;Caudoviricetes
IMGVR_UViG_3300008259_003073	huge_phage_1978	202874	Camargo.et.al.2023	Environmental;Aquatic;Freshwater	Freshwater	0.318498	High-quality	High-quality	Yes	/	Yes	Viruses;Duplodnaviria;Heunggongvirae;Uroviricota;Caudoviricetes
IMGVR_UViG_3300042482_000702	huge_phage_1981	322477	Camargo.et.al.2023	Environmental;Aquatic;Freshwater	Freshwater	0.315142	High-quality	High-quality	Yes	/	Yes	Viruses;Duplodnaviria;Heunggongvirae;Uroviricota;Caudoviricetes
IMGVR_UViG_3300018494_000083	huge_phage_1988	249687	Camargo.et.al.2023	Host-associated;Mammals;Digestive system	Animal digestive system	0.392824	High-quality	High-quality	Yes	/	Yes	Viruses;Duplodnaviria;Heunggongvirae;Uroviricota;Caudoviricetes
IMGVR_UViG_3300033148_010423	huge_phage_1990	243312	Camargo.et.al.2023	Environmental;Aquatic;Marine	Marine	0.330654	High-quality	High-quality	Yes	/	Yes	Viruses;Duplodnaviria;Heunggongvirae;Uroviricota;Caudoviricetes
IMGVR_UViG_3300039412_000320	huge_phage_1993	324848	Camargo.et.al.2023	Environmental;Terrestrial;Soil	Soil	0.508265	High-quality	High-quality	Yes	/	Yes	Viruses;Duplodnaviria;Heunggongvirae;Uroviricota;Caudoviricetes
IMGVR_UViG_3300045988_174277	huge_phage_1995	215597	Camargo.et.al.2023	Host-associated;Mammals: Human;Digestive system	Animal digestive system	0.531	High-quality	High-quality	Yes	/	Yes	Viruses;Duplodnaviria;Heunggongvirae;Uroviricota;Caudoviricetes
IMGVR_UViG_3300001525_000584	huge_phage_1996	217629	Camargo.et.al.2023	Host-associated;Mammals;Digestive system	Animal digestive system	0.355196	Complete	High-quality	Yes	/	Yes	Viruses;Duplodnaviria;Heunggongvirae;Uroviricota;Caudoviricetes
IMGVR_UViG_3300048574_000421	huge_phage_1998	251126	Camargo.et.al.2023	Engineered;Bioreactor;Denitrification	Bioreactor	0.323822	High-quality	High-quality	Yes	/	Yes	Viruses;Duplodnaviria;Heunggongvirae;Uroviricota;Caudoviricetes
IMGVR_UViG_3300027985_000918	huge_phage_2000	402383	Camargo.et.al.2023	Environmental;Aquatic;Marine	Marine	0.603398	Medium-quality	Genome-fragment	Yes	/	Yes	Viruses;Duplodnaviria;Heunggongvirae;Uroviricota;Caudoviricetes
IMGVR_UViG_3300027898_000001	huge_phage_2007	260268	Camargo.et.al.2023	Environmental;Aquatic;Freshwater	Freshwater	0.390601	Complete	High-quality	Yes	/	Yes	Viruses;Duplodnaviria;Heunggongvirae;Uroviricota;Caudoviricetes
IMGVR_UViG_3300045988_177552	huge_phage_2008	304892	Camargo.et.al.2023	Host-associated;Mammals: Human;Digestive system	Animal digestive system	0.388721	Medium-quality	Genome-fragment	Yes	/	Yes	Viruses;Duplodnaviria;Heunggongvirae;Uroviricota;Caudoviricetes
IMGVR_UViG_3300047159_000056	huge_phage_2009	207396	Camargo.et.al.2023	Engineered;WWTP;Aerobic digester	WWTP	0.319384	Medium-quality	Genome-fragment	Yes	/	Yes	Viruses;Duplodnaviria;Heunggongvirae;Uroviricota;Caudoviricetes
IMGVR_UViG_3300027770_000027	huge_phage_2013	227352	Camargo.et.al.2023	Environmental;Aquatic;Freshwater	Freshwater	0.364096	High-quality	High-quality	Yes	/	Yes	Viruses;Duplodnaviria;Heunggongvirae;Uroviricota;Caudoviricetes
IMGVR_UViG_3300007093_000061	huge_phage_2014	228796	Camargo.et.al.2023	Host-associated;Human;Digestive system	Animal digestive system	0.424269	High-quality	High-quality	Yes	/	Yes	Viruses;Duplodnaviria;Heunggongvirae;Uroviricota;Caudoviricetes
IMGVR_UViG_3300031555_003626	huge_phage_2015	233329	Camargo.et.al.2023	Host-associated;Mammals;Digestive system	Animal digestive system	0.374467	High-quality	High-quality	Yes	/	Yes	Viruses;Duplodnaviria;Heunggongvirae;Uroviricota;Caudoviricetes
IMGVR_UViG_3300011980_000002	huge_phage_2018	223032	Camargo.et.al.2023	Host-associated;Mammals: Human;Digestive system	Animal digestive system	0.274454	Complete	High-quality	Yes	/	Yes	Viruses;Duplodnaviria;Heunggongvirae;Uroviricota;Caudoviricetes
IMGVR_UViG_3300025881_000005	huge_phage_2021	206135	Camargo.et.al.2023	Environmental;Aquatic;Marine	Marine	0.400068	Medium-quality	Genome-fragment	Yes	/	Yes	Viruses;Duplodnaviria;Heunggongvirae;Uroviricota;Caudoviricetes
IMGVR_UViG_3300043172_001414	huge_phage_2029	241912	Camargo.et.al.2023	Environmental;Aquatic;Marine	Marine	0.348714	High-quality	High-quality	Yes	/	Yes	Viruses;Duplodnaviria;Heunggongvirae;Uroviricota;Caudoviricetes
IMGVR_UViG_3300046516_001816	huge_phage_2031	284983	Camargo.et.al.2023	Host-associated;Plants;Roots	Plants-related	0.566746	High-quality	High-quality	Yes	/	Yes	Viruses;Duplodnaviria;Heunggongvirae;Uroviricota;Caudoviricetes
IMGVR_UViG_3300037423_002564	huge_phage_2034	203790	Camargo.et.al.2023	Environmental;Terrestrial;Soil	Soil	0.675838	High-quality	High-quality	Yes	/	Yes	Viruses;Duplodnaviria;Heunggongvirae;Uroviricota;Caudoviricetes
IMGVR_UViG_3300020371_000002	huge_phage_2037	226622	Camargo.et.al.2023	Environmental;Aquatic;Marine	Marine	0.403822	High-quality	High-quality	Yes	/	Yes	Viruses;Duplodnaviria;Heunggongvirae;Uroviricota;Caudoviricetes
IMGVR_UViG_3300037455_000543	huge_phage_2040	424163	Camargo.et.al.2023	Host-associated;Mammals;Digestive system	Animal digestive system	0.352669	Complete	High-quality	Yes	/	Yes	Viruses;Duplodnaviria;Heunggongvirae;Uroviricota;Caudoviricetes
IMGVR_UViG_3300045988_180118	huge_phage_2042	373444	Camargo.et.al.2023	Host-associated;Mammals: Human;Digestive system	Animal digestive system	0.270702	Complete	High-quality	Yes	/	Yes	Viruses;Duplodnaviria;Heunggongvirae;Uroviricota;Caudoviricetes
IMGVR_UViG_3300007932_000005	huge_phage_2044	241490	Camargo.et.al.2023	Host-associated;Human;Digestive system	Animal digestive system	0.309189	High-quality	High-quality	Yes	/	Yes	Viruses;Duplodnaviria;Heunggongvirae;Uroviricota;Caudoviricetes
IMGVR_UViG_3300027509_000012	huge_phage_2048	302232	Camargo.et.al.2023	Host-associated;Algae;Red algae	Others	0.340146	Medium-quality	Genome-fragment	Yes	/	Yes	Viruses;Duplodnaviria;Heunggongvirae;Uroviricota;Caudoviricetes
IMGVR_UViG_3300014024_000069	huge_phage_2055	321819	Camargo.et.al.2023	Host-associated;Mammals: Human;Digestive system	Animal digestive system	0.512729	High-quality	High-quality	Yes	/	Yes	Viruses;Duplodnaviria;Heunggongvirae;Uroviricota;Caudoviricetes
IMGVR_UViG_3300021400_000048	huge_phage_2058	223464	Camargo.et.al.2023	Host-associated;Mammals;Digestive system	Animal digestive system	0.29262	Complete	High-quality	Yes	/	Yes	Viruses;Duplodnaviria;Heunggongvirae;Uroviricota;Caudoviricetes
IMGVR_UViG_3300034073_003276	huge_phage_2068	208221	Camargo.et.al.2023	Environmental;Aquatic;Deep subsurface	Deep subsurface	0.361736	High-quality	High-quality	Yes	/	Yes	Viruses;Duplodnaviria;Heunggongvirae;Uroviricota;Caudoviricetes
IMGVR_UViG_3300043449_002710	huge_phage_2069	223260	Camargo.et.al.2023	Environmental;Aquatic;Freshwater	Freshwater	0.461543	Medium-quality	Genome-fragment	Yes	/	Yes	Viruses;Duplodnaviria;Heunggongvirae;Uroviricota;Caudoviricetes
IMGVR_UViG_3300023278_002893	huge_phage_2080	297725	Camargo.et.al.2023	Environmental;Aquatic;Sediment	Others	0.47119	High-quality	High-quality	Yes	/	Yes	Viruses;Duplodnaviria;Heunggongvirae;Uroviricota;Caudoviricetes
IMGVR_UViG_3300029987_000001	huge_phage_2086	263608	Camargo.et.al.2023	Environmental;Terrestrial;Soil	Soil	0.258387	High-quality	High-quality	Yes	/	Yes	Viruses;Duplodnaviria;Heunggongvirae;Uroviricota;Caudoviricetes
IMGVR_UViG_3300032084_002047	huge_phage_2089	335552	Camargo.et.al.2023	Environmental;Aquatic;Marine	Marine	0.42338	Complete	High-quality	Yes	/	Yes	Viruses;Duplodnaviria;Heunggongvirae;Uroviricota;Caudoviricetes
IMGVR_UViG_3300032285_001531	huge_phage_2090	349679	Camargo.et.al.2023	Environmental;Aquatic;Freshwater	Freshwater	0.358921	Complete	High-quality	Yes	/	Yes	Viruses;Duplodnaviria;Heunggongvirae;Uroviricota;Caudoviricetes
IMGVR_UViG_3300042508_000526	huge_phage_2091	203264	Camargo.et.al.2023	Environmental;Aquatic;Freshwater	Freshwater	0.547534	High-quality	High-quality	Yes	/	Yes	Viruses;Duplodnaviria;Heunggongvirae;Uroviricota;Caudoviricetes
IMGVR_UViG_3300002054_000021	huge_phage_2092	208360	Camargo.et.al.2023	Host-associated;Algae;Green algae	Others	0.362786	High-quality	High-quality	Yes	/	Yes	Viruses;Duplodnaviria;Heunggongvirae;Uroviricota;Caudoviricetes
IMGVR_UViG_3300025018_000091	huge_phage_2099	444127	Camargo.et.al.2023	Environmental;Aquatic;Deep subsurface	Deep subsurface	0.338649	High-quality	High-quality	Yes	/	Yes	Viruses;Duplodnaviria;Heunggongvirae;Uroviricota;Caudoviricetes
IMGVR_UViG_3300025644_000002	huge_phage_2100	208153	Camargo.et.al.2023	Environmental;Aquatic;Marine	Marine	0.36036	High-quality	High-quality	Yes	/	Yes	Viruses;Duplodnaviria;Heunggongvirae;Uroviricota;Caudoviricetes
IMGVR_UViG_3300034105_002379	huge_phage_2101	293548	Camargo.et.al.2023	Environmental;Aquatic;Freshwater	Freshwater	0.318272	High-quality	High-quality	Yes	/	Yes	Viruses;Duplodnaviria;Heunggongvirae;Uroviricota;Caudoviricetes
IMGVR_UViG_3300046533_001163	huge_phage_2102	511254	Camargo.et.al.2023	Host-associated;Plants;Roots	Plants-related	0.391907	Medium-quality	Genome-fragment	Yes	/	Yes	Viruses;Duplodnaviria;Heunggongvirae;Uroviricota;Caudoviricetes
IMGVR_UViG_3300032327_000953	huge_phage_2109	238135	Camargo.et.al.2023	Environmental;Aquatic;Freshwater	Freshwater	0.349529	Complete	High-quality	Yes	/	Yes	Viruses;Duplodnaviria;Heunggongvirae;Uroviricota;Caudoviricetes
IMGVR_UViG_3300032245_001746	huge_phage_2112	319857	Camargo.et.al.2023	Environmental;Aquatic;Freshwater	Freshwater	0.28121	High-quality	High-quality	Yes	/	Yes	Viruses;Duplodnaviria;Heunggongvirae;Uroviricota;Caudoviricetes
IMGVR_UViG_3300037507_003370	huge_phage_2116	206291	Camargo.et.al.2023	Environmental;Aquatic;Freshwater	Freshwater	0.334086	High-quality	High-quality	Yes	/	Yes	Viruses;Duplodnaviria;Heunggongvirae;Uroviricota;Caudoviricetes
IMGVR_UViG_3300031133_000383	huge_phage_2120	437043	Camargo.et.al.2023	Host-associated;Plants;Phyllosphere	Plants-related	0.308789	High-quality	High-quality	Yes	/	Yes	Viruses;Duplodnaviria;Heunggongvirae;Uroviricota;Caudoviricetes
IMGVR_UViG_3300028888_000053	huge_phage_2122	212277	Camargo.et.al.2023	Host-associated;Mammals;Digestive system	Animal digestive system	0.315409	High-quality	High-quality	Yes	/	Yes	Viruses;Duplodnaviria;Heunggongvirae;Uroviricota;Caudoviricetes
IMGVR_UViG_3300006462_000001	huge_phage_2123	250943	Camargo.et.al.2023	Host-associated;Human;Digestive system	Animal digestive system	0.349972	Complete	High-quality	Yes	/	Yes	Viruses;Duplodnaviria;Heunggongvirae;Uroviricota;Caudoviricetes
IMGVR_UViG_3300008611_000006	huge_phage_2125	234581	Camargo.et.al.2023	Host-associated;Human;Digestive system	Animal digestive system	0.295906	Complete	High-quality	Yes	/	Yes	Viruses;Duplodnaviria;Heunggongvirae;Uroviricota;Caudoviricetes
IMGVR_UViG_3300032321_001270	huge_phage_2126	205188	Camargo.et.al.2023	Environmental;Aquatic;Freshwater	Freshwater	0.541284	High-quality	High-quality	Yes	/	Yes	Viruses;Duplodnaviria;Heunggongvirae;Uroviricota;Caudoviricetes
IMGVR_UViG_3300032007_000010	huge_phage_2127	287721	Camargo.et.al.2023	Host-associated;Mammals;Digestive system	Animal digestive system	0.513862	High-quality	High-quality	Yes	/	Yes	Viruses;Duplodnaviria;Heunggongvirae;Uroviricota;Caudoviricetes
IMGVR_UViG_3300045988_131037	huge_phage_2128	252062	Camargo.et.al.2023	Host-associated;Mammals: Human;Digestive system	Animal digestive system	0.372281	High-quality	High-quality	Yes	/	Yes	Viruses;Duplodnaviria;Heunggongvirae;Uroviricota;Caudoviricetes
IMGVR_UViG_3300021962_000022	huge_phage_2129	231821	Camargo.et.al.2023	Environmental;Aquatic;Marine	Marine	0.33943	Medium-quality	Genome-fragment	Yes	/	Yes	Viruses;Duplodnaviria;Heunggongvirae;Uroviricota;Caudoviricetes
IMGVR_UViG_3300013947_000019	huge_phage_2132	259863	Camargo.et.al.2023	Host-associated;Mammals;Digestive system	Animal digestive system	0.36906	High-quality	High-quality	Yes	/	Yes	Viruses;Duplodnaviria;Heunggongvirae;Uroviricota;Caudoviricetes
IMGVR_UViG_3300005537_000001	huge_phage_2133	368054	Camargo.et.al.2023	Environmental;Terrestrial;Soil	Soil	0.47994	Complete	High-quality	Yes	/	Yes	Viruses;Duplodnaviria;Heunggongvirae;Uroviricota;Caudoviricetes
IMGVR_UViG_3300010334_000023	huge_phage_2134	216498	Camargo.et.al.2023	Environmental;Aquatic;Freshwater	Freshwater	0.507746	Medium-quality	Genome-fragment	Yes	/	Yes	Viruses;Duplodnaviria;Heunggongvirae;Uroviricota;Caudoviricetes
IMGVR_UViG_3300017963_000192	huge_phage_2141	217703	Camargo.et.al.2023	Environmental;Aquatic;Non-marine Saline and Alkaline	Non-marine Saline and Alkaline	0.311626	Medium-quality	Genome-fragment	Yes	/	Yes	Viruses;Duplodnaviria;Heunggongvirae;Uroviricota;Caudoviricetes
IMGVR_UViG_3300003310_000099	huge_phage_2160	373404	Camargo.et.al.2023	Engineered;Bioreactor;DHS reactor	Bioreactor	0.41097	High-quality	High-quality	Yes	/	Yes	Viruses;Duplodnaviria;Heunggongvirae;Uroviricota;Caudoviricetes
IMGVR_UViG_3300021959_007005	huge_phage_2161	305533	Camargo.et.al.2023	Environmental;Aquatic;Marine	Marine	0.361797	Medium-quality	Genome-fragment	Yes	/	Yes	Viruses;Duplodnaviria;Heunggongvirae;Uroviricota;Caudoviricetes
IMGVR_UViG_3300045125_000168	huge_phage_2163	236430	Camargo.et.al.2023	Environmental;Aquatic;Freshwater	Freshwater	0.473785	Medium-quality	Genome-fragment	Yes	/	Yes	Viruses;Duplodnaviria;Heunggongvirae;Uroviricota;Caudoviricetes
IMGVR_UViG_3300031851_000001	huge_phage_2167	210988	Camargo.et.al.2023	Environmental;Aquatic;Marine	Marine	0.365888	High-quality	High-quality	Yes	/	Yes	Viruses;Duplodnaviria;Heunggongvirae;Uroviricota;Caudoviricetes
IMGVR_UViG_3300044638_006750	huge_phage_2171	232683	Camargo.et.al.2023	Environmental;Aquatic;Freshwater	Freshwater	0.35223	High-quality	High-quality	Yes	/	Yes	Viruses;Duplodnaviria;Heunggongvirae;Uroviricota;Caudoviricetes
IMGVR_UViG_3300035698_010479	huge_phage_2172	228458	Camargo.et.al.2023	Environmental;Aquatic;Non-marine Saline and Alkaline	Non-marine Saline and Alkaline	0.338767	Medium-quality	Genome-fragment	Yes	/	Yes	Viruses;Duplodnaviria;Heunggongvirae;Uroviricota;Caudoviricetes
IMGVR_UViG_3300040801_001224	huge_phage_2178	328096	Camargo.et.al.2023	Environmental;Aquatic;Marine	Marine	0.399673	Complete	High-quality	Yes	/	Yes	Viruses;Duplodnaviria;Heunggongvirae;Uroviricota;Caudoviricetes
IMGVR_UViG_3300032038_000003	huge_phage_2184	210314	Camargo.et.al.2023	Host-associated;Mammals;Digestive system	Animal digestive system	0.341642	High-quality	High-quality	Yes	/	Yes	Viruses;Duplodnaviria;Heunggongvirae;Uroviricota;Caudoviricetes
IMGVR_UViG_3300029705_000019	huge_phage_2187	205177	Camargo.et.al.2023	Host-associated;Mammals;Digestive system	Animal digestive system	0.345165	High-quality	High-quality	Yes	/	Yes	Viruses;Duplodnaviria;Heunggongvirae;Uroviricota;Caudoviricetes
IMGVR_UViG_3300032285_003957	huge_phage_2191	234116	Camargo.et.al.2023	Environmental;Aquatic;Freshwater	Freshwater	0.334979	Medium-quality	Genome-fragment	Yes	/	Yes	Viruses;Duplodnaviria;Heunggongvirae;Uroviricota;Caudoviricetes
IMGVR_UViG_3300022744_000022	huge_phage_2196	208486	Camargo.et.al.2023	Environmental;Aquatic;Freshwater	Freshwater	0.587493	Low-quality	Genome-fragment	Yes	/	Yes	Viruses;Duplodnaviria;Heunggongvirae;Uroviricota;Caudoviricetes
IMGVR_UViG_3300024252_000004	huge_phage_2199	395127	Camargo.et.al.2023	Environmental;Aquatic;Marine	Marine	0.437922	Medium-quality	Genome-fragment	Yes	/	Yes	Viruses;Duplodnaviria;Heunggongvirae;Uroviricota;Caudoviricetes
IMGVR_UViG_3300032334_002567	huge_phage_2201	381443	Camargo.et.al.2023	Environmental;Aquatic;Freshwater	Freshwater	0.36526	High-quality	High-quality	Yes	/	Yes	Viruses;Duplodnaviria;Heunggongvirae;Uroviricota;Caudoviricetes
IMGVR_UViG_3300007754_000852	huge_phage_2205	204725	Camargo.et.al.2023	Environmental;Aquatic;Marine	Marine	0.397533	Medium-quality	Genome-fragment	Yes	/	Yes	Viruses;Duplodnaviria;Heunggongvirae;Uroviricota;Caudoviricetes
IMGVR_UViG_3300031555_002904	huge_phage_2207	406409	Camargo.et.al.2023	Host-associated;Mammals;Digestive system	Animal digestive system	0.397174	High-quality	High-quality	Yes	/	Yes	Viruses;Duplodnaviria;Heunggongvirae;Uroviricota;Caudoviricetes
IMGVR_UViG_3300025924_000017	huge_phage_2209	225611	Camargo.et.al.2023	Host-associated;Plants;Roots	Plants-related	0.590676	High-quality	High-quality	Yes	/	Yes	Viruses;Duplodnaviria;Heunggongvirae;Uroviricota;Caudoviricetes
IMGVR_UViG_3300005544_000020	huge_phage_2210	236090	Camargo.et.al.2023	Host-associated;Plants;Roots	Plants-related	0.577276	High-quality	High-quality	Yes	/	Yes	Viruses;Duplodnaviria;Heunggongvirae;Uroviricota;Caudoviricetes
IMGVR_UViG_3300030019_000003	huge_phage_2211	252159	Camargo.et.al.2023	Environmental;Terrestrial;Soil	Soil	0.340539	Complete	High-quality	Yes	/	Yes	Viruses;Duplodnaviria;Heunggongvirae;Uroviricota;Caudoviricetes
IMGVR_UViG_3300042901_002340	huge_phage_2213	430130	Camargo.et.al.2023	Environmental;Aquatic;Freshwater	Freshwater	0.353393	High-quality	High-quality	Yes	/	Yes	Viruses;Duplodnaviria;Heunggongvirae;Uroviricota;Caudoviricetes
IMGVR_UViG_3300028666_000022	huge_phage_2215	339898	Camargo.et.al.2023	Host-associated;Plants;Roots	Plants-related	0.250587	Complete	High-quality	Yes	/	Yes	Viruses;Duplodnaviria;Heunggongvirae;Uroviricota;Caudoviricetes
IMGVR_UViG_3300033145_003233	huge_phage_2216	547943	Camargo.et.al.2023	Environmental;Aquatic;Marine	Marine	0.336466	High-quality	High-quality	Yes	/	Yes	Viruses;Duplodnaviria;Heunggongvirae;Uroviricota;Caudoviricetes
IMGVR_UViG_3300009784_000001	huge_phage_2219	359943	Camargo.et.al.2023	Host-associated;Arthropoda: Insects;Digestive system	Animal digestive system	0.260739	Complete	High-quality	Yes	/	Yes	Viruses;Duplodnaviria;Heunggongvirae;Uroviricota;Caudoviricetes
IMGVR_UViG_3300047499_000113	huge_phage_2225	240015	Camargo.et.al.2023	Host-associated;Plants;Peat moss	Plants-related	0.597817	Medium-quality	Genome-fragment	Yes	/	Yes	Viruses;Duplodnaviria;Heunggongvirae;Uroviricota;Caudoviricetes
IMGVR_UViG_3300033068_001704	huge_phage_2227	222154	Camargo.et.al.2023	Engineered;WWTP;Wastewater	WWTP	0.630432	Low-quality	Genome-fragment	Yes	/	Yes	Viruses;Duplodnaviria;Heunggongvirae;Uroviricota;Caudoviricetes
IMGVR_UViG_3300025389_000011	huge_phage_2232	223865	Camargo.et.al.2023	Environmental;Aquatic;Freshwater	Freshwater	0.360927	Medium-quality	Genome-fragment	Yes	/	Yes	Viruses;Duplodnaviria;Heunggongvirae;Uroviricota;Caudoviricetes
IMGVR_UViG_3300045988_179268	huge_phage_2236	319426	Camargo.et.al.2023	Host-associated;Mammals: Human;Digestive system	Animal digestive system	0.493476	Complete	High-quality	Yes	/	Yes	Viruses;Duplodnaviria;Heunggongvirae;Uroviricota;Caudoviricetes
IMGVR_UViG_3300027740_000003	huge_phage_2240	435004	Camargo.et.al.2023	Environmental;Terrestrial;Soil	Soil	0.352013	High-quality	High-quality	Yes	/	Yes	Viruses;Duplodnaviria;Heunggongvirae;Uroviricota;Caudoviricetes
IMGVR_UViG_3300037512_000782	huge_phage_2241	348092	Camargo.et.al.2023	Host-associated;Mammals;Digestive system	Animal digestive system	0.50439	Medium-quality	Genome-fragment	Yes	/	Yes	Viruses;Duplodnaviria;Heunggongvirae;Uroviricota;Caudoviricetes
IMGVR_UViG_3300008408_000061	huge_phage_2249	209742	Camargo.et.al.2023	Host-associated;Human;Digestive system	Animal digestive system	0.471777	Medium-quality	Genome-fragment	Yes	/	Yes	Viruses;Duplodnaviria;Heunggongvirae;Uroviricota;Caudoviricetes
IMGVR_UViG_3300045988_125730	huge_phage_2257	210650	Camargo.et.al.2023	Host-associated;Mammals: Human;Digestive system	Animal digestive system	0.444861	Medium-quality	Genome-fragment	Yes	/	Yes	Viruses;Duplodnaviria;Heunggongvirae;Uroviricota;Caudoviricetes
IMGVR_UViG_3300025451_000008	huge_phage_2260	204113	Camargo.et.al.2023	Environmental;Aquatic;Marine	Marine	0.301686	High-quality	High-quality	Yes	/	Yes	Viruses;Duplodnaviria;Heunggongvirae;Uroviricota;Caudoviricetes
IMGVR_UViG_3300014000_000001	huge_phage_2261	232790	Camargo.et.al.2023	Engineered;Built environment;City	Built environment	0.379978	Medium-quality	Genome-fragment	Yes	/	Yes	Viruses;Duplodnaviria;Heunggongvirae;Uroviricota;Caudoviricetes
IMGVR_UViG_3300048599_000194	huge_phage_2263	306252	Camargo.et.al.2023	Engineered;Bioreactor;Denitrification	Bioreactor	0.388961	Complete	High-quality	Yes	/	Yes	Viruses;Duplodnaviria;Heunggongvirae;Uroviricota;Caudoviricetes
IMGVR_UViG_3300008756_000003	huge_phage_2266	214232	Camargo.et.al.2023	Host-associated;Human;Digestive system	Animal digestive system	0.33438	High-quality	High-quality	Yes	/	Yes	Viruses;Duplodnaviria;Heunggongvirae;Uroviricota;Caudoviricetes
IMGVR_UViG_3300047567_000058	huge_phage_2268	201011	Camargo.et.al.2023	Engineered;WWTP;Aerobic digester	WWTP	0.499042	Medium-quality	Genome-fragment	Yes	/	Yes	Viruses;Duplodnaviria;Heunggongvirae;Uroviricota;Caudoviricetes
IMGVR_UViG_3300032328_000860	huge_phage_2270	223437	Camargo.et.al.2023	Environmental;Aquatic;Freshwater	Freshwater	0.346505	High-quality	High-quality	Yes	/	Yes	Viruses;Duplodnaviria;Heunggongvirae;Uroviricota;Caudoviricetes
IMGVR_UViG_3300025121_000013	huge_phage_2274	265532	Camargo.et.al.2023	Environmental;Terrestrial;Deep subsurface	Deep subsurface	0.288918	High-quality	High-quality	Yes	/	Yes	Viruses;Duplodnaviria;Heunggongvirae;Uroviricota;Caudoviricetes
IMGVR_UViG_3300027977_000006	huge_phage_2276	228838	Camargo.et.al.2023	Environmental;Aquatic;Freshwater	Freshwater	0.312946	Medium-quality	Genome-fragment	Yes	/	Yes	Viruses;Duplodnaviria;Heunggongvirae;Uroviricota;Caudoviricetes
IMGVR_UViG_3300020177_000001	huge_phage_2290	312414	Camargo.et.al.2023	Environmental;Aquatic;Marine	Marine	0.384291	High-quality	High-quality	Yes	/	Yes	Viruses;Duplodnaviria;Heunggongvirae;Uroviricota;Caudoviricetes
IMGVR_UViG_3300042342_001286	huge_phage_2294	213871	Camargo.et.al.2023	Environmental;Aquatic;Freshwater	Freshwater	0.313455	Medium-quality	Genome-fragment	Yes	/	Yes	Viruses;Duplodnaviria;Heunggongvirae;Uroviricota;Caudoviricetes
IMGVR_UViG_3300045988_131081	huge_phage_2305	256405	Camargo.et.al.2023	Host-associated;Mammals: Human;Digestive system	Animal digestive system	0.350496	High-quality	High-quality	Yes	/	Yes	Viruses;Duplodnaviria;Heunggongvirae;Uroviricota;Caudoviricetes
IMGVR_UViG_3300009372_000001	huge_phage_2308	323540	Camargo.et.al.2023	Environmental;Aquatic;Marine	Marine	0.512836	Medium-quality	Genome-fragment	Yes	/	Yes	Viruses;Duplodnaviria;Heunggongvirae;Uroviricota;Caudoviricetes
IMGVR_UViG_3300044641_005618	huge_phage_2311	262030	Camargo.et.al.2023	Environmental;Aquatic;Freshwater	Freshwater	0.496993	High-quality	High-quality	Yes	/	Yes	Viruses;Duplodnaviria;Heunggongvirae;Uroviricota;Caudoviricetes
IMGVR_UViG_3300045988_164299	huge_phage_2312	208689	Camargo.et.al.2023	Host-associated;Mammals: Human;Digestive system	Animal digestive system	0.327454	High-quality	High-quality	Yes	/	Yes	Viruses;Duplodnaviria;Heunggongvirae;Uroviricota;Caudoviricetes
IMGVR_UViG_3300022935_000005	huge_phage_2317	280913	Camargo.et.al.2023	Environmental;Aquatic;Marine	Marine	0.449317	High-quality	High-quality	Yes	/	Yes	Viruses;Duplodnaviria;Heunggongvirae;Uroviricota;Caudoviricetes
IMGVR_UViG_3300021425_003554	huge_phage_2319	234317	Camargo.et.al.2023	Environmental;Aquatic;Marine	Marine	0.373144	Medium-quality	Genome-fragment	Yes	/	Yes	Viruses;Duplodnaviria;Heunggongvirae;Uroviricota;Caudoviricetes
IMGVR_UViG_3300023184_000025	huge_phage_2321	345154	Camargo.et.al.2023	Environmental;Aquatic;Freshwater	Freshwater	0.402962	Medium-quality	Genome-fragment	Yes	/	Yes	Viruses;Duplodnaviria;Heunggongvirae;Uroviricota;Caudoviricetes
IMGVR_UViG_3300042502_001233	huge_phage_2326	362018	Camargo.et.al.2023	Environmental;Aquatic;Freshwater	Freshwater	0.313971	High-quality	High-quality	Yes	/	Yes	Viruses;Duplodnaviria;Heunggongvirae;Uroviricota;Caudoviricetes
IMGVR_UViG_3300025309_000005	huge_phage_2327	332731	Camargo.et.al.2023	Environmental;Aquatic;Deep subsurface	Deep subsurface	0.38147	High-quality	High-quality	Yes	/	Yes	Viruses;Duplodnaviria;Heunggongvirae;Uroviricota;Caudoviricetes
IMGVR_UViG_3300020048_006428	huge_phage_2330	276400	Camargo.et.al.2023	Environmental;Aquatic;Freshwater	Freshwater	0.250373	Medium-quality	Genome-fragment	Yes	/	Yes	Viruses;Duplodnaviria;Heunggongvirae;Uroviricota;Caudoviricetes
IMGVR_UViG_3300031555_001469	huge_phage_2333	229809	Camargo.et.al.2023	Host-associated;Mammals;Digestive system	Animal digestive system	0.335653	High-quality	High-quality	Yes	/	Yes	Viruses;Duplodnaviria;Heunggongvirae;Uroviricota;Caudoviricetes
IMGVR_UViG_3300021400_002728	huge_phage_2335	394266	Camargo.et.al.2023	Host-associated;Mammals;Digestive system	Animal digestive system	0.323246	Complete	High-quality	Yes	/	Yes	Viruses;Duplodnaviria;Heunggongvirae;Uroviricota;Caudoviricetes
IMGVR_UViG_3300035180_003177	huge_phage_2337	452202	Camargo.et.al.2023	Environmental;Aquatic;Freshwater	Freshwater	0.365065	Complete	High-quality	Yes	/	Yes	Viruses;Duplodnaviria;Heunggongvirae;Uroviricota;Caudoviricetes
IMGVR_UViG_3300048598_000287	huge_phage_2338	277197	Camargo.et.al.2023	Engineered;Bioreactor;Denitrification	Bioreactor	0.408547	Medium-quality	Genome-fragment	Yes	/	Yes	Viruses;Duplodnaviria;Heunggongvirae;Uroviricota;Caudoviricetes
IMGVR_UViG_3300043077_000092	huge_phage_2340	220177	Camargo.et.al.2023	Host-associated;Mammals;Digestive system	Animal digestive system	0.374853	High-quality	High-quality	Yes	/	Yes	Viruses;Duplodnaviria;Heunggongvirae;Uroviricota;Caudoviricetes
IMGVR_UViG_3300015050_001523	huge_phage_2341	322518	Camargo.et.al.2023	Environmental;Aquatic;Freshwater	Freshwater	0.33587	High-quality	High-quality	Yes	/	Yes	Viruses;Duplodnaviria;Heunggongvirae;Uroviricota;Caudoviricetes
IMGVR_UViG_3300043446_003163	huge_phage_2344	215197	Camargo.et.al.2023	Environmental;Aquatic;Freshwater	Freshwater	0.342017	High-quality	High-quality	Yes	/	Yes	Viruses;Duplodnaviria;Heunggongvirae;Uroviricota;Caudoviricetes
IMGVR_UViG_3300008114_001632	huge_phage_2346	320450	Camargo.et.al.2023	Environmental;Aquatic;Freshwater	Freshwater	0.372776	Medium-quality	Genome-fragment	Yes	/	Yes	Viruses;Duplodnaviria;Heunggongvirae;Uroviricota;Caudoviricetes
IMGVR_UViG_3300042268_000564	huge_phage_2353	398427	Camargo.et.al.2023	Engineered;WWTP;Industrial WWTP	WWTP	0.39603	High-quality	High-quality	Yes	/	Yes	Viruses;Duplodnaviria;Heunggongvirae;Uroviricota;Caudoviricetes
IMGVR_UViG_3300021964_000012	huge_phage_2361	328292	Camargo.et.al.2023	Environmental;Aquatic;Marine	Marine	0.374974	Complete	High-quality	Yes	/	Yes	Viruses;Duplodnaviria;Heunggongvirae;Uroviricota;Caudoviricetes
IMGVR_UViG_3300031419_000004	huge_phage_2367	249316	Camargo.et.al.2023	Host-associated;Plants;Phyllosphere	Plants-related	0.520207	High-quality	High-quality	Yes	/	Yes	Viruses;Duplodnaviria;Heunggongvirae;Uroviricota;Caudoviricetes
IMGVR_UViG_3300027805_000006	huge_phage_2374	329993	Camargo.et.al.2023	Environmental;Aquatic;Freshwater	Freshwater	0.421909	Complete	High-quality	Yes	/	Yes	Viruses;Duplodnaviria;Heunggongvirae;Uroviricota;Caudoviricetes
IMGVR_UViG_3300022752_000014	huge_phage_2376	250224	Camargo.et.al.2023	Environmental;Aquatic;Freshwater	Freshwater	0.370656	High-quality	High-quality	Yes	/	Yes	Viruses;Duplodnaviria;Heunggongvirae;Uroviricota;Caudoviricetes
IMGVR_UViG_3300025011_000016	huge_phage_2378	272509	Camargo.et.al.2023	Environmental;Aquatic;Deep subsurface	Deep subsurface	0.314272	High-quality	High-quality	Yes	/	Yes	Viruses;Duplodnaviria;Heunggongvirae;Uroviricota;Caudoviricetes
IMGVR_UViG_3300045988_171124	huge_phage_2380	212985	Camargo.et.al.2023	Host-associated;Mammals: Human;Digestive system	Animal digestive system	0.326539	Complete	High-quality	Yes	/	Yes	Viruses;Duplodnaviria;Heunggongvirae;Uroviricota;Caudoviricetes
IMGVR_UViG_3300033120_001080	huge_phage_2381	249994	Camargo.et.al.2023	Engineered;WWTP;Sewage	WWTP	0.481788	Medium-quality	Genome-fragment	Yes	/	Yes	Viruses;Duplodnaviria;Heunggongvirae;Uroviricota;Caudoviricetes
IMGVR_UViG_3300047564_001818	huge_phage_2384	202031	Camargo.et.al.2023	Environmental;Aquatic;Freshwater	Freshwater	0.399666	Medium-quality	Genome-fragment	Yes	/	Yes	Viruses;Duplodnaviria;Heunggongvirae;Uroviricota;Caudoviricetes
IMGVR_UViG_3300037297_000066	huge_phage_2391	437331	Camargo.et.al.2023	Environmental;Aquatic;Marine	Marine	0.551973	Complete	High-quality	Yes	/	Yes	Viruses;Duplodnaviria;Heunggongvirae;Uroviricota;Caudoviricetes
IMGVR_UViG_3300035698_013060	huge_phage_2392	241176	Camargo.et.al.2023	Environmental;Aquatic;Non-marine Saline and Alkaline	Non-marine Saline and Alkaline	0.483605	Complete	High-quality	Yes	/	Yes	Viruses;Duplodnaviria;Heunggongvirae;Uroviricota;Caudoviricetes
IMGVR_UViG_3300023297_000003	huge_phage_2401	528282	Camargo.et.al.2023	Environmental;Aquatic;Non-marine Saline and Alkaline	Non-marine Saline and Alkaline	0.56166	High-quality	High-quality	Yes	/	Yes	Viruses;Duplodnaviria;Heunggongvirae;Uroviricota;Caudoviricetes
IMGVR_UViG_3300049141_000138	huge_phage_2406	252073	Camargo.et.al.2023	Environmental;Terrestrial;Soil	Soil	0.636272	High-quality	High-quality	Yes	/	Yes	Viruses;Duplodnaviria;Heunggongvirae;Uroviricota;Caudoviricetes
IMGVR_UViG_3300045988_107814	huge_phage_2408	218921	Camargo.et.al.2023	Host-associated;Mammals: Human;Digestive system	Animal digestive system	0.300912	Complete	High-quality	Yes	/	Yes	Viruses;Duplodnaviria;Heunggongvirae;Uroviricota;Caudoviricetes
IMGVR_UViG_3300021426_000063	huge_phage_2412	233103	Camargo.et.al.2023	Host-associated;Mammals;Digestive system	Animal digestive system	0.352346	Medium-quality	Genome-fragment	Yes	/	Yes	Viruses;Duplodnaviria;Heunggongvirae;Uroviricota;Caudoviricetes
IMGVR_UViG_3300028184_000003	huge_phage_2413	233373	Camargo.et.al.2023	Environmental;Terrestrial;Soil	Soil	0.586465	Complete	High-quality	Yes	/	Yes	Viruses;Duplodnaviria;Heunggongvirae;Uroviricota;Caudoviricetes
IMGVR_UViG_3300008436_000001	huge_phage_2415	254212	Camargo.et.al.2023	Host-associated;Human;Digestive system	Animal digestive system	0.341435	Complete	High-quality	Yes	/	Yes	Viruses;Duplodnaviria;Heunggongvirae;Uroviricota;Caudoviricetes
IMGVR_UViG_3300003310_000098	huge_phage_2417	210307	Camargo.et.al.2023	Engineered;Bioreactor;DHS reactor	Bioreactor	0.389469	Medium-quality	Genome-fragment	Yes	/	Yes	Viruses;Duplodnaviria;Heunggongvirae;Uroviricota;Caudoviricetes
IMGVR_UViG_3300044633_001982	huge_phage_2423	220090	Camargo.et.al.2023	Environmental;Aquatic;Freshwater	Freshwater	0.306098	Medium-quality	Genome-fragment	Yes	/	Yes	Viruses;Duplodnaviria;Heunggongvirae;Uroviricota;Caudoviricetes
IMGVR_UViG_3300027770_001980	huge_phage_2426	221356	Camargo.et.al.2023	Environmental;Aquatic;Freshwater	Freshwater	0.391302	Medium-quality	Genome-fragment	Yes	/	Yes	Viruses;Duplodnaviria;Heunggongvirae;Uroviricota;Caudoviricetes
IMGVR_UViG_3300020050_009209	huge_phage_2429	381772	Camargo.et.al.2023	Environmental;Aquatic;Freshwater	Freshwater	0.515234	Medium-quality	Genome-fragment	Yes	/	Yes	Viruses;Duplodnaviria;Heunggongvirae;Uroviricota;Caudoviricetes
IMGVR_UViG_3300028549_000507	huge_phage_2432	200251	Camargo.et.al.2023	Environmental;Aquatic;Freshwater	Freshwater	0.331244	Medium-quality	Genome-fragment	Yes	/	Yes	Viruses;Duplodnaviria;Heunggongvirae;Uroviricota;Caudoviricetes
IMGVR_UViG_3300021400_000063	huge_phage_2434	279224	Camargo.et.al.2023	Host-associated;Mammals;Digestive system	Animal digestive system	0.289037	Complete	High-quality	Yes	/	Yes	Viruses;Duplodnaviria;Heunggongvirae;Uroviricota;Caudoviricetes
IMGVR_UViG_3300037424_001372	huge_phage_2437	324744	Camargo.et.al.2023	Environmental;Aquatic;Floodplain	Others	0.27599	High-quality	High-quality	Yes	/	Yes	Viruses;Duplodnaviria;Heunggongvirae;Uroviricota;Caudoviricetes
IMGVR_UViG_3300045988_163480	huge_phage_2439	237358	Camargo.et.al.2023	Host-associated;Mammals: Human;Digestive system	Animal digestive system	0.335552	Medium-quality	Genome-fragment	Yes	/	Yes	Viruses;Duplodnaviria;Heunggongvirae;Uroviricota;Caudoviricetes
IMGVR_UViG_3300005686_000008	huge_phage_2445	505397	Camargo.et.al.2023	Engineered;WWTP;Nutrient removal	WWTP	0.398289	Complete	High-quality	Yes	/	Yes	Viruses;Duplodnaviria;Heunggongvirae;Uroviricota;Caudoviricetes
IMGVR_UViG_3300028833_000061	huge_phage_2446	201401	Camargo.et.al.2023	Host-associated;Mammals;Digestive system	Animal digestive system	0.502803	High-quality	High-quality	Yes	/	Yes	Viruses;Duplodnaviria;Heunggongvirae;Uroviricota;Caudoviricetes
IMGVR_UViG_3300042288_001626	huge_phage_2447	201264	Camargo.et.al.2023	Environmental;Aquatic;Freshwater	Freshwater	0.429828	Complete	High-quality	Yes	/	Yes	Viruses;Duplodnaviria;Heunggongvirae;Uroviricota;Caudoviricetes
IMGVR_UViG_3300033996_001745	huge_phage_2451	210328	Camargo.et.al.2023	Environmental;Aquatic;Freshwater	Freshwater	0.375086	High-quality	High-quality	Yes	/	Yes	Viruses;Duplodnaviria;Heunggongvirae;Uroviricota;Caudoviricetes
IMGVR_UViG_3300037042_002125	huge_phage_2460	222078	Camargo.et.al.2023	Environmental;Aquatic;Freshwater	Freshwater	0.461108	Medium-quality	Genome-fragment	Yes	/	Yes	Viruses;Duplodnaviria;Heunggongvirae;Uroviricota;Caudoviricetes
IMGVR_UViG_3300042013_000067	huge_phage_2461	283622	Camargo.et.al.2023	Host-associated;Plants;Roots	Plants-related	0.519861	Complete	High-quality	Yes	/	Yes	Viruses;Duplodnaviria;Heunggongvirae;Uroviricota;Caudoviricetes
IMGVR_UViG_3300042934_000212	huge_phage_2475	356444	Camargo.et.al.2023	Environmental;Terrestrial;Soil	Soil	0.368535	Complete	High-quality	Yes	/	Yes	Viruses;Duplodnaviria;Heunggongvirae;Uroviricota;Caudoviricetes
IMGVR_UViG_3300028797_000093	huge_phage_2476	253886	Camargo.et.al.2023	Host-associated;Mammals;Digestive system	Animal digestive system	0.315681	High-quality	High-quality	Yes	/	Yes	Viruses;Duplodnaviria;Heunggongvirae;Uroviricota;Caudoviricetes
IMGVR_UViG_3300033070_001123	huge_phage_2477	231063	Camargo.et.al.2023	Environmental;Aquatic;Freshwater	Freshwater	0.406383	High-quality	High-quality	Yes	/	Yes	Viruses;Duplodnaviria;Heunggongvirae;Uroviricota;Caudoviricetes
IMGVR_UViG_3300033997_000243	huge_phage_2478	319518	Camargo.et.al.2023	Environmental;Aquatic;Deep subsurface	Deep subsurface	0.375929	Complete	High-quality	Yes	/	Yes	Viruses;Duplodnaviria;Heunggongvirae;Uroviricota;Caudoviricetes
IMGVR_UViG_3300043464_002149	huge_phage_2479	200854	Camargo.et.al.2023	Environmental;Aquatic;Freshwater	Freshwater	0.319411	Medium-quality	Genome-fragment	Yes	/	Yes	Viruses;Duplodnaviria;Heunggongvirae;Uroviricota;Caudoviricetes
IMGVR_UViG_3300027255_000165	huge_phage_2480	223386	Camargo.et.al.2023	Environmental;Aquatic;Marine	Marine	0.393977	Low-quality	Genome-fragment	Yes	/	Yes	Viruses;Duplodnaviria;Heunggongvirae;Uroviricota;Caudoviricetes
IMGVR_UViG_3300043399_000272	huge_phage_2489	260148	Camargo.et.al.2023	Environmental;Aquatic;Freshwater	Freshwater	0.377981	Medium-quality	Genome-fragment	Yes	/	Yes	Viruses;Duplodnaviria;Heunggongvirae;Uroviricota;Caudoviricetes
IMGVR_UViG_3300021387_000661	huge_phage_2497	344746	Camargo.et.al.2023	Host-associated;Mammals;Digestive system	Animal digestive system	0.34725	High-quality	High-quality	Yes	/	Yes	Viruses;Duplodnaviria;Heunggongvirae;Uroviricota;Caudoviricetes
IMGVR_UViG_3300029336_000001	huge_phage_8026	401496	Camargo.et.al.2023	Host-associated;Human;Digestive system	Animal digestive system	0.299622	High-quality	High-quality	Yes	/	Yes	Viruses;Duplodnaviria;Heunggongvirae;Uroviricota;Caudoviricetes
IMGVR_UViG_3300031133_000001	huge_phage_2503	463849	Camargo.et.al.2023	Host-associated;Plants;Phyllosphere	Plants-related	0.528929	Complete	High-quality	Yes	/	Yes	Viruses;Duplodnaviria;Heunggongvirae;Uroviricota;Caudoviricetes
IMGVR_UViG_3300042691_038938	huge_phage_2508	213270	Camargo.et.al.2023	Environmental;Aquatic;Freshwater	Freshwater	0.404201	Low-quality	Genome-fragment	Yes	/	Yes	Viruses;Duplodnaviria;Heunggongvirae;Uroviricota;Caudoviricetes
IMGVR_UViG_3300045747_000505	huge_phage_2510	273537	Camargo.et.al.2023	Environmental;Aquatic;Freshwater	Freshwater	0.578887	Medium-quality	Genome-fragment	Yes	/	Yes	Viruses;Duplodnaviria;Heunggongvirae;Uroviricota;Caudoviricetes
IMGVR_UViG_3300050120_000361	huge_phage_2512	208538	Camargo.et.al.2023	Environmental;Terrestrial;Soil	Soil	0.52904	Complete	High-quality	Yes	/	Yes	Viruses;Duplodnaviria;Heunggongvirae;Uroviricota;Caudoviricetes
IMGVR_UViG_3300030041_000009	huge_phage_2515	256033	Camargo.et.al.2023	Environmental;Terrestrial;Soil	Soil	0.222538	Medium-quality	Genome-fragment	Yes	/	Yes	Viruses;Duplodnaviria;Heunggongvirae;Uroviricota;Caudoviricetes
IMGVR_UViG_3300023047_000002	huge_phage_2516	243002	Camargo.et.al.2023	Host-associated;Mammals;Digestive system	Animal digestive system	0.421536	High-quality	High-quality	Yes	/	Yes	Viruses;Duplodnaviria;Heunggongvirae;Uroviricota;Caudoviricetes
IMGVR_UViG_3300042261_002385	huge_phage_2517	436265	Camargo.et.al.2023	Environmental;Aquatic;Freshwater	Freshwater	0.314529	High-quality	High-quality	Yes	/	Yes	Viruses;Duplodnaviria;Heunggongvirae;Uroviricota;Caudoviricetes
IMGVR_UViG_3300033498_000048	huge_phage_2519	305782	Camargo.et.al.2023	Environmental;Aquatic;Freshwater	Freshwater	0.312471	Complete	High-quality	Yes	/	Yes	Viruses;Duplodnaviria;Heunggongvirae;Uroviricota;Caudoviricetes
IMGVR_UViG_3300035492_000309	huge_phage_2521	254123	Camargo.et.al.2023	Environmental;Terrestrial;Asphalt lakes	Others	0.529137	Complete	High-quality	Yes	/	Yes	Viruses;Duplodnaviria;Heunggongvirae;Uroviricota;Caudoviricetes
IMGVR_UViG_3300035182_001152	huge_phage_2527	206473	Camargo.et.al.2023	Environmental;Aquatic;Freshwater	Freshwater	0.513346	Medium-quality	Genome-fragment	Yes	/	Yes	Viruses;Duplodnaviria;Heunggongvirae;Uroviricota;Caudoviricetes
IMGVR_UViG_3300045988_137032	huge_phage_2528	261692	Camargo.et.al.2023	Host-associated;Mammals: Human;Digestive system	Animal digestive system	0.395411	Complete	High-quality	Yes	/	Yes	Viruses;Duplodnaviria;Heunggongvirae;Uroviricota;Caudoviricetes
IMGVR_UViG_3300045988_154892	huge_phage_2529	212138	Camargo.et.al.2023	Host-associated;Mammals: Human;Digestive system	Animal digestive system	0.332491	Complete	High-quality	Yes	/	Yes	Viruses;Duplodnaviria;Heunggongvirae;Uroviricota;Caudoviricetes
IMGVR_UViG_3300011226_000001	huge_phage_2531	268224	Camargo.et.al.2023	Engineered;Built environment;City	Built environment	0.490005	Complete	High-quality	Yes	/	Yes	Viruses;Duplodnaviria;Heunggongvirae;Uroviricota;Caudoviricetes
IMGVR_UViG_3300006292_000168	huge_phage_2537	374688	Camargo.et.al.2023	Host-associated;Human;Digestive system	Animal digestive system	0.479714	High-quality	High-quality	Yes	/	Yes	Viruses;Duplodnaviria;Heunggongvirae;Uroviricota;Caudoviricetes
IMGVR_UViG_3300036715_001822	huge_phage_2540	290571	Camargo.et.al.2023	Environmental;Aquatic;Freshwater	Freshwater	0.421474	Medium-quality	Genome-fragment	Yes	/	Yes	Viruses;Duplodnaviria;Heunggongvirae;Uroviricota;Caudoviricetes
IMGVR_UViG_3300033997_000092	huge_phage_2541	261032	Camargo.et.al.2023	Environmental;Aquatic;Deep subsurface	Deep subsurface	0.434257	Complete	High-quality	Yes	/	Yes	Viruses;Duplodnaviria;Heunggongvirae;Uroviricota;Caudoviricetes
IMGVR_UViG_3300028177_000001	huge_phage_2542	288255	Camargo.et.al.2023	Environmental;Aquatic;Marine	Marine	0.620222	Medium-quality	Genome-fragment	Yes	/	Yes	Viruses;Duplodnaviria;Heunggongvirae;Uroviricota;Caudoviricetes
IMGVR_UViG_3300025133_000019	huge_phage_2546	374268	Camargo.et.al.2023	Environmental;Aquatic;Marine	Marine	0.374181	High-quality	High-quality	Yes	/	Yes	Viruses;Duplodnaviria;Heunggongvirae;Uroviricota;Caudoviricetes
IMGVR_UViG_3300021185_002017	huge_phage_2547	208572	Camargo.et.al.2023	Environmental;Aquatic;Marine	Marine	0.372399	Medium-quality	Genome-fragment	Yes	/	Yes	Viruses;Duplodnaviria;Heunggongvirae;Uroviricota;Caudoviricetes
IMGVR_UViG_3300045988_167493	huge_phage_2550	202148	Camargo.et.al.2023	Host-associated;Mammals: Human;Digestive system	Animal digestive system	0.32869	Complete	High-quality	Yes	/	Yes	Viruses;Duplodnaviria;Heunggongvirae;Uroviricota;Caudoviricetes
IMGVR_UViG_3300003877_000001	huge_phage_2551	325854	Camargo.et.al.2023	Environmental;Aquatic;Marine	Marine	0.274755	High-quality	High-quality	Yes	/	Yes	Viruses;Duplodnaviria;Heunggongvirae;Uroviricota;Caudoviricetes
IMGVR_UViG_3300037067_009442	huge_phage_2552	228619	Camargo.et.al.2023	Engineered;Solid waste;Landfill	Landfill	0.508707	Low-quality	Genome-fragment	Yes	/	Yes	Viruses;Duplodnaviria;Heunggongvirae;Uroviricota;Caudoviricetes
IMGVR_UViG_3300045988_176431	huge_phage_2554	254365	Camargo.et.al.2023	Host-associated;Mammals: Human;Digestive system	Animal digestive system	0.287268	Complete	High-quality	Yes	/	Yes	Viruses;Duplodnaviria;Heunggongvirae;Uroviricota;Caudoviricetes
IMGVR_UViG_3300021387_000074	huge_phage_2564	233115	Camargo.et.al.2023	Host-associated;Mammals;Digestive system	Animal digestive system	0.341977	Complete	High-quality	Yes	/	Yes	Viruses;Duplodnaviria;Heunggongvirae;Uroviricota;Caudoviricetes
IMGVR_UViG_3300009372_003475	huge_phage_2567	221878	Camargo.et.al.2023	Environmental;Aquatic;Marine	Marine	0.384734	High-quality	High-quality	Yes	/	Yes	Viruses;Duplodnaviria;Heunggongvirae;Uroviricota;Caudoviricetes
IMGVR_UViG_3300026478_000263	huge_phage_2568	304615	Camargo.et.al.2023	Environmental;Aquatic;Freshwater	Freshwater	0.396973	Medium-quality	Genome-fragment	Yes	/	Yes	Viruses;Duplodnaviria;Heunggongvirae;Uroviricota;Caudoviricetes
IMGVR_UViG_3300044712_001462	huge_phage_2570	224528	Camargo.et.al.2023	Host-associated;Plants;Roots	Plants-related	0.52785	High-quality	High-quality	Yes	/	Yes	Viruses;Duplodnaviria;Heunggongvirae;Uroviricota;Caudoviricetes
IMGVR_UViG_3300035145_003993	huge_phage_2577	211364	Camargo.et.al.2023	Environmental;Aquatic;Marine	Marine	0.273926	Medium-quality	Genome-fragment	Yes	/	Yes	Viruses;Duplodnaviria;Heunggongvirae;Uroviricota;Caudoviricetes
IMGVR_UViG_3300025913_000019	huge_phage_2581	212062	Camargo.et.al.2023	Host-associated;Plants;Roots	Plants-related	0.621158	Medium-quality	Genome-fragment	Yes	/	Yes	Viruses;Duplodnaviria;Heunggongvirae;Uroviricota;Caudoviricetes
IMGVR_UViG_3300029258_002185	huge_phage_2582	207878	Camargo.et.al.2023	Environmental;Aquatic;Marine	Marine	0.596773	Complete	High-quality	Yes	/	Yes	Viruses;Duplodnaviria;Heunggongvirae;Uroviricota;Caudoviricetes
IMGVR_UViG_3300045988_108436	huge_phage_2583	305890	Camargo.et.al.2023	Host-associated;Mammals: Human;Digestive system	Animal digestive system	0.379117	Complete	High-quality	Yes	/	Yes	Viruses;Duplodnaviria;Heunggongvirae;Uroviricota;Caudoviricetes
IMGVR_UViG_3300006752_000009	huge_phage_2588	345452	Camargo.et.al.2023	Environmental;Aquatic;Marine	Marine	0.432743	High-quality	High-quality	Yes	/	Yes	Viruses;Duplodnaviria;Heunggongvirae;Uroviricota;Caudoviricetes
IMGVR_UViG_3300033072_000529	huge_phage_2590	272063	Camargo.et.al.2023	Engineered;WWTP;Wastewater	WWTP	0.37223	Complete	High-quality	Yes	/	Yes	Viruses;Duplodnaviria;Heunggongvirae;Uroviricota;Caudoviricetes
IMGVR_UViG_3300045988_170940	huge_phage_2591	238204	Camargo.et.al.2023	Host-associated;Mammals: Human;Digestive system	Animal digestive system	0.312547	Complete	High-quality	Yes	/	Yes	Viruses;Duplodnaviria;Heunggongvirae;Uroviricota;Caudoviricetes
IMGVR_UViG_3300025735_000002	huge_phage_2593	226777	Camargo.et.al.2023	Host-associated;Plants;Roots	Plants-related	0.528078	Complete	High-quality	Yes	/	Yes	Viruses;Duplodnaviria;Heunggongvirae;Uroviricota;Caudoviricetes
IMGVR_UViG_3300037418_002116	huge_phage_2595	261400	Camargo.et.al.2023	Host-associated;Plants;Roots	Plants-related	0.447422	High-quality	High-quality	Yes	/	Yes	Viruses;Duplodnaviria;Heunggongvirae;Uroviricota;Caudoviricetes
IMGVR_UViG_3300007220_000010	huge_phage_2596	233866	Camargo.et.al.2023	Host-associated;Human;Digestive system	Animal digestive system	0.303246	High-quality	High-quality	Yes	/	Yes	Viruses;Duplodnaviria;Heunggongvirae;Uroviricota;Caudoviricetes
IMGVR_UViG_3300008634_000002	huge_phage_2597	212292	Camargo.et.al.2023	Host-associated;Human;Digestive system	Animal digestive system	0.29581	Complete	High-quality	Yes	/	Yes	Viruses;Duplodnaviria;Heunggongvirae;Uroviricota;Caudoviricetes
IMGVR_UViG_3300035180_001680	huge_phage_2604	338129	Camargo.et.al.2023	Environmental;Aquatic;Freshwater	Freshwater	0.366168	Complete	High-quality	Yes	/	Yes	Viruses;Duplodnaviria;Heunggongvirae;Uroviricota;Caudoviricetes
IMGVR_UViG_3300020048_003360	huge_phage_2606	208022	Camargo.et.al.2023	Environmental;Aquatic;Freshwater	Freshwater	0.349665	Medium-quality	Genome-fragment	Yes	/	Yes	Viruses;Duplodnaviria;Heunggongvirae;Uroviricota;Caudoviricetes
IMGVR_UViG_3300005611_000001	huge_phage_2607	213270	Camargo.et.al.2023	Environmental;Aquatic;Non-marine Saline and Alkaline	Non-marine Saline and Alkaline	0.421836	High-quality	High-quality	Yes	/	Yes	Viruses;Duplodnaviria;Heunggongvirae;Uroviricota;Caudoviricetes
IMGVR_UViG_3300044591_002232	huge_phage_2608	249820	Camargo.et.al.2023	Environmental;Aquatic;Freshwater	Freshwater	0.373089	Complete	High-quality	Yes	/	Yes	Viruses;Duplodnaviria;Heunggongvirae;Uroviricota;Caudoviricetes
IMGVR_UViG_3300025913_000017	huge_phage_2610	249771	Camargo.et.al.2023	Host-associated;Plants;Roots	Plants-related	0.615812	Medium-quality	Genome-fragment	Yes	/	Yes	Viruses;Duplodnaviria;Heunggongvirae;Uroviricota;Caudoviricetes
IMGVR_UViG_3300021960_000017	huge_phage_2612	228546	Camargo.et.al.2023	Environmental;Aquatic;Marine	Marine	0.385327	Medium-quality	Genome-fragment	Yes	/	Yes	Viruses;Duplodnaviria;Heunggongvirae;Uroviricota;Caudoviricetes
IMGVR_UViG_3300005289_000002	huge_phage_2614	236534	Camargo.et.al.2023	Host-associated;Plants;Roots	Plants-related	0.482755	Complete	High-quality	Yes	/	Yes	Viruses;Duplodnaviria;Heunggongvirae;Uroviricota;Caudoviricetes
IMGVR_UViG_3300044878_000094	huge_phage_2621	219030	Camargo.et.al.2023	Engineered;Built environment;Canal	Built environment	0.505693	High-quality	High-quality	Yes	/	Yes	Viruses;Duplodnaviria;Heunggongvirae;Uroviricota;Caudoviricetes
IMGVR_UViG_3300046517_000518	huge_phage_2622	218286	Camargo.et.al.2023	Host-associated;Plants;Roots	Plants-related	0.563536	Medium-quality	Genome-fragment	Yes	/	Yes	Viruses;Duplodnaviria;Heunggongvirae;Uroviricota;Caudoviricetes
IMGVR_UViG_3300045988_178616	huge_phage_2625	259346	Camargo.et.al.2023	Host-associated;Mammals: Human;Digestive system	Animal digestive system	0.479934	Complete	High-quality	Yes	/	Yes	Viruses;Duplodnaviria;Heunggongvirae;Uroviricota;Caudoviricetes
IMGVR_UViG_3300010885_025649	huge_phage_2626	212497	Camargo.et.al.2023	Environmental;Aquatic;Freshwater	Freshwater	0.366589	High-quality	High-quality	Yes	/	Yes	Viruses;Duplodnaviria;Heunggongvirae;Uroviricota;Caudoviricetes
IMGVR_UViG_3300044852_000015	huge_phage_2627	238014	Camargo.et.al.2023	Engineered;Built environment;Canal	Built environment	0.515781	Medium-quality	Genome-fragment	Yes	/	Yes	Viruses;Duplodnaviria;Heunggongvirae;Uroviricota;Caudoviricetes
IMGVR_UViG_3300032242_002041	huge_phage_2630	228286	Camargo.et.al.2023	Environmental;Aquatic;Freshwater	Freshwater	0.415847	Medium-quality	Genome-fragment	Yes	/	Yes	Viruses;Duplodnaviria;Heunggongvirae;Uroviricota;Caudoviricetes
IMGVR_UViG_3300035180_000666	huge_phage_2636	286616	Camargo.et.al.2023	Environmental;Aquatic;Freshwater	Freshwater	0.471896	Complete	High-quality	Yes	/	Yes	Viruses;Duplodnaviria;Heunggongvirae;Uroviricota;Caudoviricetes
IMGVR_UViG_3300029305_005484	huge_phage_2639	275780	Camargo.et.al.2023	Host-associated;Mammals;Digestive system	Animal digestive system	0.285104	High-quality	High-quality	Yes	/	Yes	Viruses;Duplodnaviria;Heunggongvirae;Uroviricota;Caudoviricetes
IMGVR_UViG_3300007125_000006	huge_phage_2641	206989	Camargo.et.al.2023	Host-associated;Human;Digestive system	Animal digestive system	0.348647	Medium-quality	Genome-fragment	Yes	/	Yes	Viruses;Duplodnaviria;Heunggongvirae;Uroviricota;Caudoviricetes
IMGVR_UViG_3300031760_000001	huge_phage_2651	244784	Camargo.et.al.2023	Host-associated;Mammals;Digestive system	Animal digestive system	0.359619	Medium-quality	Genome-fragment	Yes	/	Yes	Viruses;Duplodnaviria;Heunggongvirae;Uroviricota;Caudoviricetes
IMGVR_UViG_3300007123_000012	huge_phage_2652	239045	Camargo.et.al.2023	Host-associated;Human;Digestive system	Animal digestive system	0.326349	High-quality	High-quality	Yes	/	Yes	Viruses;Duplodnaviria;Heunggongvirae;Uroviricota;Caudoviricetes
IMGVR_UViG_3300046513_000348	huge_phage_2653	218660	Camargo.et.al.2023	Host-associated;Plants;Roots	Plants-related	0.524696	High-quality	High-quality	Yes	/	Yes	Viruses;Duplodnaviria;Heunggongvirae;Uroviricota;Caudoviricetes
IMGVR_UViG_3300036770_007283	huge_phage_2654	252699	Camargo.et.al.2023	Environmental;Aquatic;Deep subsurface	Deep subsurface	0.355447	Medium-quality	Genome-fragment	Yes	/	Yes	Viruses;Duplodnaviria;Heunggongvirae;Uroviricota;Caudoviricetes
IMGVR_UViG_3300043399_001054	huge_phage_2660	214237	Camargo.et.al.2023	Environmental;Aquatic;Freshwater	Freshwater	0.343993	Complete	High-quality	Yes	/	Yes	Viruses;Duplodnaviria;Heunggongvirae;Uroviricota;Caudoviricetes
IMGVR_UViG_3300008518_000006	huge_phage_2663	222273	Camargo.et.al.2023	Host-associated;Human;Digestive system	Animal digestive system	0.322933	High-quality	High-quality	Yes	/	Yes	Viruses;Duplodnaviria;Heunggongvirae;Uroviricota;Caudoviricetes
IMGVR_UViG_3300008134_000001	huge_phage_2664	212573	Camargo.et.al.2023	Host-associated;Human;Digestive system	Animal digestive system	0.312547	Complete	High-quality	Yes	/	Yes	Viruses;Duplodnaviria;Heunggongvirae;Uroviricota;Caudoviricetes
IMGVR_UViG_3300021963_000024	huge_phage_2668	238732	Camargo.et.al.2023	Environmental;Aquatic;Marine	Marine	0.312024	Complete	High-quality	Yes	/	Yes	Viruses;Duplodnaviria;Heunggongvirae;Uroviricota;Caudoviricetes
IMGVR_UViG_3300013288_000004	huge_phage_2669	306759	Camargo.et.al.2023	Engineered;WWTP;Nutrient removal	WWTP	0.358395	Medium-quality	Genome-fragment	Yes	/	Yes	Viruses;Duplodnaviria;Heunggongvirae;Uroviricota;Caudoviricetes
IMGVR_UViG_3300042308_001616	huge_phage_2675	248751	Camargo.et.al.2023	Environmental;Aquatic;Freshwater	Freshwater	0.357337	Medium-quality	Genome-fragment	Yes	/	Yes	Viruses;Duplodnaviria;Heunggongvirae;Uroviricota;Caudoviricetes
IMGVR_UViG_3300027782_000029	huge_phage_2677	202697	Camargo.et.al.2023	Environmental;Aquatic;Freshwater	Freshwater	0.375654	High-quality	High-quality	Yes	/	Yes	Viruses;Duplodnaviria;Heunggongvirae;Uroviricota;Caudoviricetes
IMGVR_UViG_3300045988_152590	huge_phage_2686	233354	Camargo.et.al.2023	Host-associated;Mammals: Human;Digestive system	Animal digestive system	0.473204	High-quality	High-quality	Yes	/	Yes	Viruses;Duplodnaviria;Heunggongvirae;Uroviricota;Caudoviricetes
IMGVR_UViG_3300037067_016777	huge_phage_2688	269105	Camargo.et.al.2023	Engineered;Solid waste;Landfill	Landfill	0.432359	Medium-quality	Genome-fragment	Yes	/	Yes	Viruses;Duplodnaviria;Heunggongvirae;Uroviricota;Caudoviricetes
IMGVR_UViG_3300047321_000652	huge_phage_2692	313355	Camargo.et.al.2023	Host-associated;Plants;Roots	Plants-related	0.562333	Complete	High-quality	Yes	/	Yes	Viruses;Duplodnaviria;Heunggongvirae;Uroviricota;Caudoviricetes
IMGVR_UViG_3300015214_000001	huge_phage_2705	208458	Camargo.et.al.2023	Engineered;Solid waste;Landfill	Landfill	0.394967	Complete	High-quality	Yes	/	Yes	Viruses;Duplodnaviria;Heunggongvirae;Uroviricota;Caudoviricetes
IMGVR_UViG_3300012933_000323	huge_phage_2706	205555	Camargo.et.al.2023	Environmental;Aquatic;Freshwater	Freshwater	0.374974	High-quality	High-quality	Yes	/	Yes	Viruses;Duplodnaviria;Heunggongvirae;Uroviricota;Caudoviricetes
IMGVR_UViG_3300036770_008729	huge_phage_2712	281114	Camargo.et.al.2023	Environmental;Aquatic;Deep subsurface	Deep subsurface	0.300227	High-quality	High-quality	Yes	/	Yes	Viruses;Duplodnaviria;Heunggongvirae;Uroviricota;Caudoviricetes
IMGVR_UViG_3300014205_000175	huge_phage_2716	202826	Camargo.et.al.2023	Engineered;Solid waste;Landfill	Landfill	0.479288	Medium-quality	Genome-fragment	Yes	/	Yes	Viruses;Duplodnaviria;Heunggongvirae;Uroviricota;Caudoviricetes
IMGVR_UViG_3300042432_001272	huge_phage_2718	217893	Camargo.et.al.2023	Environmental;Aquatic;Freshwater	Freshwater	0.346363	Low-quality	Genome-fragment	Yes	/	Yes	Viruses;Duplodnaviria;Heunggongvirae;Uroviricota;Caudoviricetes
IMGVR_UViG_3300046008_000242	huge_phage_2722	249362	Camargo.et.al.2023	Environmental;Aquatic;Freshwater	Freshwater	0.321942	High-quality	High-quality	Yes	/	Yes	Viruses;Duplodnaviria;Heunggongvirae;Uroviricota;Caudoviricetes
IMGVR_UViG_3300045988_106171	huge_phage_2725	259720	Camargo.et.al.2023	Host-associated;Mammals: Human;Digestive system	Animal digestive system	0.32855	Complete	High-quality	Yes	/	Yes	Viruses;Duplodnaviria;Heunggongvirae;Uroviricota;Caudoviricetes
IMGVR_UViG_3300032007_000002	huge_phage_2729	432572	Camargo.et.al.2023	Host-associated;Mammals;Digestive system	Animal digestive system	0.5626	High-quality	High-quality	Yes	/	Yes	Viruses;Duplodnaviria;Heunggongvirae;Uroviricota;Caudoviricetes
IMGVR_UViG_3300037189_030782	huge_phage_2732	265278	Camargo.et.al.2023	Environmental;Aquatic;Freshwater	Freshwater	0.371667	High-quality	High-quality	Yes	/	Yes	Viruses;Duplodnaviria;Heunggongvirae;Uroviricota;Caudoviricetes
IMGVR_UViG_3300002038_000006	huge_phage_2734	218099	Camargo.et.al.2023	Host-associated;Algae;Red algae	Others	0.40737	Medium-quality	Genome-fragment	Yes	/	Yes	Viruses;Duplodnaviria;Heunggongvirae;Uroviricota;Caudoviricetes
IMGVR_UViG_3300030085_002431	huge_phage_2735	250613	Camargo.et.al.2023	Environmental;Aquatic;Marine	Marine	0.381965	High-quality	High-quality	Yes	/	Yes	Viruses;Duplodnaviria;Heunggongvirae;Uroviricota;Caudoviricetes
IMGVR_UViG_3300027844_001828	huge_phage_2736	235624	Camargo.et.al.2023	Environmental;Aquatic;Marine	Marine	0.414291	High-quality	High-quality	Yes	/	Yes	Viruses;Duplodnaviria;Heunggongvirae;Uroviricota;Caudoviricetes
IMGVR_UViG_3300014208_000023	huge_phage_2739	428320	Camargo.et.al.2023	Environmental;Aquatic;Deep subsurface	Deep subsurface	0.396678	Complete	High-quality	Yes	/	Yes	Viruses;Duplodnaviria;Heunggongvirae;Uroviricota;Caudoviricetes
IMGVR_UViG_3300032030_002018	huge_phage_2740	334726	Camargo.et.al.2023	Host-associated;Mammals;Digestive system	Animal digestive system	0.340891	High-quality	High-quality	Yes	/	Yes	Viruses;Duplodnaviria;Heunggongvirae;Uroviricota;Caudoviricetes
IMGVR_UViG_3300042975_000096	huge_phage_2741	322223	Camargo.et.al.2023	Engineered;Bioreactor;Anaerobic	Bioreactor	0.300425	High-quality	High-quality	Yes	/	Yes	Viruses;Duplodnaviria;Heunggongvirae;Uroviricota;Caudoviricetes
IMGVR_UViG_3300024518_000033	huge_phage_2746	293317	Camargo.et.al.2023	Environmental;Aquatic;Marine	Marine	0.331201	High-quality	High-quality	Yes	/	Yes	Viruses;Duplodnaviria;Heunggongvirae;Uroviricota;Caudoviricetes
IMGVR_UViG_3300011989_000257	huge_phage_2747	412514	Camargo.et.al.2023	Host-associated;Mammals;Digestive system	Animal digestive system	0.345271	High-quality	High-quality	Yes	/	Yes	Viruses;Duplodnaviria;Heunggongvirae;Uroviricota;Caudoviricetes
IMGVR_UViG_3300045988_082304	huge_phage_2750	244984	Camargo.et.al.2023	Host-associated;Mammals: Human;Digestive system	Animal digestive system	0.337785	High-quality	High-quality	Yes	/	Yes	Viruses;Duplodnaviria;Heunggongvirae;Uroviricota;Caudoviricetes
IMGVR_UViG_3300026085_000093	huge_phage_2751	236366	Camargo.et.al.2023	Environmental;Aquatic;Marine	Marine	0.351929	Medium-quality	Genome-fragment	Yes	/	Yes	Viruses;Duplodnaviria;Heunggongvirae;Uroviricota;Caudoviricetes
IMGVR_UViG_3300008262_000001	huge_phage_2753	316478	Camargo.et.al.2023	Environmental;Aquatic;Freshwater	Freshwater	0.348675	Medium-quality	Genome-fragment	Yes	/	Yes	Viruses;Duplodnaviria;Heunggongvirae;Uroviricota;Caudoviricetes
IMGVR_UViG_3300031857_000014	huge_phage_2754	205290	Camargo.et.al.2023	Environmental;Aquatic;Freshwater	Freshwater	0.305066	Medium-quality	Genome-fragment	Yes	/	Yes	Viruses;Duplodnaviria;Heunggongvirae;Uroviricota;Caudoviricetes
IMGVR_UViG_3300007931_000004	huge_phage_2757	278782	Camargo.et.al.2023	Host-associated;Human;Digestive system	Animal digestive system	0.387848	High-quality	High-quality	Yes	/	Yes	Viruses;Duplodnaviria;Heunggongvirae;Uroviricota;Caudoviricetes
IMGVR_UViG_3300031994_000005	huge_phage_2759	241933	Camargo.et.al.2023	Host-associated;Mammals;Digestive system	Animal digestive system	0.368933	Medium-quality	Genome-fragment	Yes	/	Yes	Viruses;Duplodnaviria;Heunggongvirae;Uroviricota;Caudoviricetes
IMGVR_UViG_3300028898_000252	huge_phage_2766	390884	Camargo.et.al.2023	Engineered;Bioreactor;Aerobic	Bioreactor	0.328985	Complete	High-quality	Yes	/	Yes	Viruses;Duplodnaviria;Heunggongvirae;Uroviricota;Caudoviricetes
IMGVR_UViG_3300011242_000001	huge_phage_2768	380997	Camargo.et.al.2023	Engineered;Built environment;City	Built environment	0.302485	Complete	High-quality	Yes	/	Yes	Viruses;Duplodnaviria;Heunggongvirae;Uroviricota;Caudoviricetes
IMGVR_UViG_3300044971_004534	huge_phage_2771	406100	Camargo.et.al.2023	Environmental;Aquatic;Freshwater	Freshwater	0.380244	Complete	High-quality	Yes	/	Yes	Viruses;Duplodnaviria;Heunggongvirae;Uroviricota;Caudoviricetes
IMGVR_UViG_3300030005_000003	huge_phage_2777	229556	Camargo.et.al.2023	Environmental;Terrestrial;Soil	Soil	0.463499	High-quality	High-quality	Yes	/	Yes	Viruses;Duplodnaviria;Heunggongvirae;Uroviricota;Caudoviricetes
IMGVR_UViG_3300011337_000669	huge_phage_2778	276376	Camargo.et.al.2023	Environmental;Aquatic;Freshwater	Freshwater	0.334899	Medium-quality	Genome-fragment	Yes	/	Yes	Viruses;Duplodnaviria;Heunggongvirae;Uroviricota;Caudoviricetes
IMGVR_UViG_3300037245_004649	huge_phage_2779	216576	Camargo.et.al.2023	Environmental;Aquatic;Marine	Marine	0.596779	High-quality	High-quality	Yes	/	Yes	Viruses;Duplodnaviria;Heunggongvirae;Uroviricota;Caudoviricetes
IMGVR_UViG_3300028393_000019	huge_phage_2783	265680	Camargo.et.al.2023	Environmental;Aquatic;Freshwater	Freshwater	0.419926	Medium-quality	Genome-fragment	Yes	/	Yes	Viruses;Duplodnaviria;Heunggongvirae;Uroviricota;Caudoviricetes
IMGVR_UViG_3300047994_000374	huge_phage_2784	394192	Camargo.et.al.2023	Host-associated;Plants;Peat moss	Plants-related	0.360472	High-quality	High-quality	Yes	/	Yes	Viruses;Duplodnaviria;Heunggongvirae;Uroviricota;Caudoviricetes
IMGVR_UViG_3300046005_000547	huge_phage_2787	234735	Camargo.et.al.2023	Environmental;Aquatic;Freshwater	Freshwater	0.314597	Complete	High-quality	Yes	/	Yes	Viruses;Duplodnaviria;Heunggongvirae;Uroviricota;Caudoviricetes
IMGVR_UViG_3300027759_000043	huge_phage_2797	349373	Camargo.et.al.2023	Environmental;Aquatic;Freshwater	Freshwater	0.432466	Medium-quality	Genome-fragment	Yes	/	Yes	Viruses;Duplodnaviria;Heunggongvirae;Uroviricota;Caudoviricetes
IMGVR_UViG_3300042922_000270	huge_phage_2798	208594	Camargo.et.al.2023	Environmental;Terrestrial;Soil	Soil	0.461183	Medium-quality	Genome-fragment	Yes	/	Yes	Viruses;Duplodnaviria;Heunggongvirae;Uroviricota;Caudoviricetes
IMGVR_UViG_3300006333_000001	huge_phage_2801	241492	Camargo.et.al.2023	Host-associated;Human;Digestive system	Animal digestive system	0.308855	Complete	High-quality	Yes	/	Yes	Viruses;Duplodnaviria;Heunggongvirae;Uroviricota;Caudoviricetes
IMGVR_UViG_3300015263_000944	huge_phage_2802	238888	Camargo.et.al.2023	Environmental;Aquatic;Marine	Marine	0.509502	Medium-quality	Genome-fragment	Yes	/	Yes	Viruses;Duplodnaviria;Heunggongvirae;Uroviricota;Caudoviricetes
IMGVR_UViG_3300020469_000008	huge_phage_2803	202054	Camargo.et.al.2023	Environmental;Aquatic;Marine	Marine	0.365872	Medium-quality	Genome-fragment	Yes	/	Yes	Viruses;Duplodnaviria;Heunggongvirae;Uroviricota;Caudoviricetes
IMGVR_UViG_3300008515_000005	huge_phage_2806	245889	Camargo.et.al.2023	Host-associated;Human;Digestive system	Animal digestive system	0.317363	High-quality	High-quality	Yes	/	Yes	Viruses;Duplodnaviria;Heunggongvirae;Uroviricota;Caudoviricetes
IMGVR_UViG_3300028833_006005	huge_phage_2807	380519	Camargo.et.al.2023	Host-associated;Mammals;Digestive system	Animal digestive system	0.280512	High-quality	High-quality	Yes	/	Yes	Viruses;Duplodnaviria;Heunggongvirae;Uroviricota;Caudoviricetes
IMGVR_UViG_3300031801_001562	huge_phage_2822	227579	Camargo.et.al.2023	Environmental;Aquatic;Marine	Marine	0.340379	High-quality	High-quality	Yes	/	Yes	Viruses;Duplodnaviria;Heunggongvirae;Uroviricota;Caudoviricetes
IMGVR_UViG_3300021137_000001	huge_phage_2831	329321	Camargo.et.al.2023	Environmental;Aquatic;Freshwater	Freshwater	0.374124	Complete	High-quality	Yes	/	Yes	Viruses;Duplodnaviria;Heunggongvirae;Uroviricota;Caudoviricetes
IMGVR_UViG_3300044557_000292	huge_phage_2837	419707	Camargo.et.al.2023	Engineered;Bioreactor;Anaerobic	Bioreactor	0.494976	High-quality	High-quality	Yes	/	Yes	Viruses;Duplodnaviria;Heunggongvirae;Uroviricota;Caudoviricetes
IMGVR_UViG_3300020172_006270	huge_phage_2842	223268	Camargo.et.al.2023	Environmental;Aquatic;Freshwater	Freshwater	0.458494	Medium-quality	Genome-fragment	Yes	/	Yes	Viruses;Duplodnaviria;Heunggongvirae;Uroviricota;Caudoviricetes
IMGVR_UViG_3300028275_000007	huge_phage_2845	207869	Camargo.et.al.2023	Environmental;Aquatic;Freshwater	Freshwater	0.39307	Medium-quality	Genome-fragment	Yes	/	Yes	Viruses;Duplodnaviria;Heunggongvirae;Uroviricota;Caudoviricetes
IMGVR_UViG_3300020435_000001	huge_phage_2852	207748	Camargo.et.al.2023	Environmental;Aquatic;Marine	Marine	0.442647	Medium-quality	Genome-fragment	Yes	/	Yes	Viruses;Duplodnaviria;Heunggongvirae;Uroviricota;Caudoviricetes
IMGVR_UViG_3300033183_000491	huge_phage_2853	239550	Camargo.et.al.2023	Environmental;Aquatic;Marine	Marine	0.293258	Complete	High-quality	Yes	/	Yes	Viruses;Duplodnaviria;Heunggongvirae;Uroviricota;Caudoviricetes
IMGVR_UViG_3300045988_175595	huge_phage_2858	245223	Camargo.et.al.2023	Host-associated;Mammals: Human;Digestive system	Animal digestive system	0.24764	High-quality	High-quality	Yes	/	Yes	Viruses;Duplodnaviria;Heunggongvirae;Uroviricota;Caudoviricetes
IMGVR_UViG_3300037789_000070	huge_phage_2869	327992	Camargo.et.al.2023	Environmental;Aquatic;Non-marine Saline and Alkaline	Non-marine Saline and Alkaline	0.384217	Medium-quality	Genome-fragment	Yes	/	Yes	Viruses;Duplodnaviria;Heunggongvirae;Uroviricota;Caudoviricetes
IMGVR_UViG_3300010213_000001	huge_phage_2870	244700	Camargo.et.al.2023	Environmental;Aquatic;Deep subsurface	Deep subsurface	0.30197	High-quality	High-quality	Yes	/	Yes	Viruses;Duplodnaviria;Heunggongvirae;Uroviricota;Caudoviricetes
IMGVR_UViG_3300034101_004588	huge_phage_2874	210956	Camargo.et.al.2023	Environmental;Aquatic;Freshwater	Freshwater	0.30923	High-quality	High-quality	Yes	/	Yes	Viruses;Duplodnaviria;Heunggongvirae;Uroviricota;Caudoviricetes
IMGVR_UViG_3300033562_000572	huge_phage_2878	225566	Camargo.et.al.2023	Environmental;Aquatic;Freshwater	Freshwater	0.298041	High-quality	High-quality	Yes	/	Yes	Viruses;Duplodnaviria;Heunggongvirae;Uroviricota;Caudoviricetes
IMGVR_UViG_3300025896_000021	huge_phage_2879	359393	Camargo.et.al.2023	Environmental;Aquatic;Marine	Marine	0.407643	Medium-quality	Genome-fragment	Yes	/	Yes	Viruses;Duplodnaviria;Heunggongvirae;Uroviricota;Caudoviricetes
IMGVR_UViG_3300044846_003573	huge_phage_2884	213659	Camargo.et.al.2023	Environmental;Aquatic;Freshwater	Freshwater	0.309713	Medium-quality	Genome-fragment	Yes	/	Yes	Viruses;Duplodnaviria;Heunggongvirae;Uroviricota;Caudoviricetes
IMGVR_UViG_3300045988_167732	huge_phage_2885	220795	Camargo.et.al.2023	Host-associated;Mammals: Human;Digestive system	Animal digestive system	0.328404	Complete	High-quality	Yes	/	Yes	Viruses;Duplodnaviria;Heunggongvirae;Uroviricota;Caudoviricetes
IMGVR_UViG_3300005512_005684	huge_phage_2890	331348	Camargo.et.al.2023	Environmental;Aquatic;Non-marine Saline and Alkaline	Non-marine Saline and Alkaline	0.524074	High-quality	High-quality	Yes	/	Yes	Viruses;Duplodnaviria;Heunggongvirae;Uroviricota;Caudoviricetes
IMGVR_UViG_3300034170_000057	huge_phage_2892	250850	Camargo.et.al.2023	Environmental;Terrestrial;Soil	Soil	0.506725	Medium-quality	Genome-fragment	Yes	/	Yes	Viruses;Duplodnaviria;Heunggongvirae;Uroviricota;Caudoviricetes
IMGVR_UViG_3300033977_000108	huge_phage_2897	204633	Camargo.et.al.2023	Environmental;Terrestrial;Soil	Soil	0.500462	Complete	High-quality	Yes	/	Yes	Viruses;Duplodnaviria;Heunggongvirae;Uroviricota;Caudoviricetes
IMGVR_UViG_3300029305_003192	huge_phage_2899	239651	Camargo.et.al.2023	Host-associated;Mammals;Digestive system	Animal digestive system	0.40786	High-quality	High-quality	Yes	/	Yes	Viruses;Duplodnaviria;Heunggongvirae;Uroviricota;Caudoviricetes
IMGVR_UViG_3300028591_000074	huge_phage_2900	253527	Camargo.et.al.2023	Host-associated;Mammals;Digestive system	Animal digestive system	0.35752	High-quality	High-quality	Yes	/	Yes	Viruses;Duplodnaviria;Heunggongvirae;Uroviricota;Caudoviricetes
IMGVR_UViG_3300002835_000001	huge_phage_2901	297651	Camargo.et.al.2023	Environmental;Aquatic;Freshwater	Freshwater	0.323103	Medium-quality	Genome-fragment	Yes	/	Yes	Viruses;Duplodnaviria;Heunggongvirae;Uroviricota;Caudoviricetes
IMGVR_UViG_3300037484_000445	huge_phage_2904	451925	Camargo.et.al.2023	Environmental;Aquatic;Floodplain	Others	0.523091	High-quality	High-quality	Yes	/	Yes	Viruses;Duplodnaviria;Heunggongvirae;Uroviricota;Caudoviricetes
IMGVR_UViG_3300045988_101532	huge_phage_2907	201931	Camargo.et.al.2023	Host-associated;Mammals: Human;Digestive system	Animal digestive system	0.31333	Medium-quality	Genome-fragment	Yes	/	Yes	Viruses;Duplodnaviria;Heunggongvirae;Uroviricota;Caudoviricetes
IMGVR_UViG_3300045988_160394	huge_phage_2912	263172	Camargo.et.al.2023	Host-associated;Mammals: Human;Digestive system	Animal digestive system	0.277997	Complete	High-quality	Yes	/	Yes	Viruses;Duplodnaviria;Heunggongvirae;Uroviricota;Caudoviricetes
IMGVR_UViG_3300045391_005020	huge_phage_2915	214858	Camargo.et.al.2023	Environmental;Terrestrial;Soil	Soil	0.600485	High-quality	High-quality	Yes	/	Yes	Viruses;Duplodnaviria;Heunggongvirae;Uroviricota;Caudoviricetes
IMGVR_UViG_3300033119_001723	huge_phage_2917	234927	Camargo.et.al.2023	Engineered;WWTP;Activated Sludge	WWTP	0.358941	High-quality	High-quality	Yes	/	Yes	Viruses;Duplodnaviria;Heunggongvirae;Uroviricota;Caudoviricetes
IMGVR_UViG_3300023174_000047	huge_phage_2918	203774	Camargo.et.al.2023	Environmental;Aquatic;Freshwater	Freshwater	0.373698	Medium-quality	Genome-fragment	Yes	/	Yes	Viruses;Duplodnaviria;Heunggongvirae;Uroviricota;Caudoviricetes
IMGVR_UViG_3300043446_004437	huge_phage_2924	216024	Camargo.et.al.2023	Environmental;Aquatic;Freshwater	Freshwater	0.36595	High-quality	High-quality	Yes	/	Yes	Viruses;Duplodnaviria;Heunggongvirae;Uroviricota;Caudoviricetes
IMGVR_UViG_3300036944_001324	huge_phage_2927	271654	Camargo.et.al.2023	Environmental;Aquatic;Deep subsurface	Deep subsurface	0.511883	High-quality	High-quality	Yes	/	Yes	Viruses;Duplodnaviria;Heunggongvirae;Uroviricota;Caudoviricetes
IMGVR_UViG_3300008363_000089	huge_phage_2929	394300	Camargo.et.al.2023	Host-associated;Human;Digestive system	Animal digestive system	0.555268	High-quality	High-quality	Yes	/	Yes	Viruses;Duplodnaviria;Heunggongvirae;Uroviricota;Caudoviricetes
IMGVR_UViG_3300035520_000350	huge_phage_2930	242978	Camargo.et.al.2023	Host-associated;Mammals;Digestive system	Animal digestive system	0.358905	High-quality	High-quality	Yes	/	Yes	Viruses;Duplodnaviria;Heunggongvirae;Uroviricota;Caudoviricetes
IMGVR_UViG_3300008255_000098	huge_phage_2934	200117	Camargo.et.al.2023	Environmental;Aquatic;Deep subsurface	Deep subsurface	0.356781	Medium-quality	Genome-fragment	Yes	/	Yes	Viruses;Duplodnaviria;Heunggongvirae;Uroviricota;Caudoviricetes
IMGVR_UViG_3300047558_000137	huge_phage_2939	374314	Camargo.et.al.2023	Environmental;Aquatic;Freshwater	Freshwater	0.407249	High-quality	High-quality	Yes	/	Yes	Viruses;Duplodnaviria;Heunggongvirae;Uroviricota;Caudoviricetes
IMGVR_UViG_3300025849_003344	huge_phage_2941	207406	Camargo.et.al.2023	Environmental;Aquatic;Marine	Marine	0.383489	High-quality	High-quality	Yes	/	Yes	Viruses;Duplodnaviria;Heunggongvirae;Uroviricota;Caudoviricetes
IMGVR_UViG_3300022719_000284	huge_phage_2944	210369	Camargo.et.al.2023	Environmental;Aquatic;Non-marine Saline and Alkaline	Non-marine Saline and Alkaline	0.421402	Medium-quality	Genome-fragment	Yes	/	Yes	Viruses;Duplodnaviria;Heunggongvirae;Uroviricota;Caudoviricetes
IMGVR_UViG_3300046660_000716	huge_phage_2945	259338	Camargo.et.al.2023	Host-associated;Plants;Roots	Plants-related	0.655712	Complete	High-quality	Yes	/	Yes	Viruses;Duplodnaviria;Heunggongvirae;Uroviricota;Caudoviricetes
IMGVR_UViG_3300007500_000151	huge_phage_2949	233832	Camargo.et.al.2023	Host-associated;Human;Digestive system	Animal digestive system	0.337264	High-quality	High-quality	Yes	/	Yes	Viruses;Duplodnaviria;Heunggongvirae;Uroviricota;Caudoviricetes
IMGVR_UViG_3300020450_000008	huge_phage_2951	208332	Camargo.et.al.2023	Environmental;Aquatic;Marine	Marine	0.339631	High-quality	High-quality	Yes	/	Yes	Viruses;Duplodnaviria;Heunggongvirae;Uroviricota;Caudoviricetes
IMGVR_UViG_3300020039_000432	huge_phage_2953	229126	Camargo.et.al.2023	Host-associated;Mammals;Digestive system	Animal digestive system	0.372708	High-quality	High-quality	Yes	/	Yes	Viruses;Duplodnaviria;Heunggongvirae;Uroviricota;Caudoviricetes
IMGVR_UViG_3300020057_000023	huge_phage_2954	215452	Camargo.et.al.2023	Environmental;Aquatic;Freshwater	Freshwater	0.625104	High-quality	High-quality	Yes	/	Yes	Viruses;Duplodnaviria;Heunggongvirae;Uroviricota;Caudoviricetes
IMGVR_UViG_3300045988_170901	huge_phage_2955	213994	Camargo.et.al.2023	Host-associated;Mammals: Human;Digestive system	Animal digestive system	0.26104	Medium-quality	Genome-fragment	Yes	/	Yes	Viruses;Duplodnaviria;Heunggongvirae;Uroviricota;Caudoviricetes
IMGVR_UViG_3300042691_055965	huge_phage_2958	229188	Camargo.et.al.2023	Environmental;Aquatic;Freshwater	Freshwater	0.309903	Medium-quality	Genome-fragment	Yes	/	Yes	Viruses;Duplodnaviria;Heunggongvirae;Uroviricota;Caudoviricetes
IMGVR_UViG_3300045988_163575	huge_phage_2965	282357	Camargo.et.al.2023	Host-associated;Mammals: Human;Digestive system	Animal digestive system	0.335104	Medium-quality	Genome-fragment	Yes	/	Yes	Viruses;Duplodnaviria;Heunggongvirae;Uroviricota;Caudoviricetes
IMGVR_UViG_3300028833_000057	huge_phage_2966	267826	Camargo.et.al.2023	Host-associated;Mammals;Digestive system	Animal digestive system	0.334702	High-quality	High-quality	Yes	/	Yes	Viruses;Duplodnaviria;Heunggongvirae;Uroviricota;Caudoviricetes
IMGVR_UViG_3300037466_003648	huge_phage_2967	205180	Camargo.et.al.2023	Host-associated;Plants;Roots	Plants-related	0.62798	Complete	High-quality	Yes	/	Yes	Viruses;Duplodnaviria;Heunggongvirae;Uroviricota;Caudoviricetes
IMGVR_UViG_3300025707_000003	huge_phage_2971	205703	Camargo.et.al.2023	Environmental;Aquatic;Marine	Marine	0.422974	High-quality	High-quality	Yes	/	Yes	Viruses;Duplodnaviria;Heunggongvirae;Uroviricota;Caudoviricetes
IMGVR_UViG_3300028029_000006	huge_phage_2972	409147	Camargo.et.al.2023	Host-associated;Annelida;Integument	Others	0.319259	Medium-quality	Genome-fragment	Yes	/	Yes	Viruses;Duplodnaviria;Heunggongvirae;Uroviricota;Caudoviricetes
IMGVR_UViG_3300027666_000001	huge_phage_2973	202648	Camargo.et.al.2023	Host-associated;Plants;Roots	Plants-related	0.662716	Complete	High-quality	Yes	/	Yes	Viruses;Duplodnaviria;Heunggongvirae;Uroviricota;Caudoviricetes
IMGVR_UViG_3300027710_000009	huge_phage_2977	371055	Camargo.et.al.2023	Environmental;Aquatic;Deep subsurface	Deep subsurface	0.444306	High-quality	High-quality	Yes	/	Yes	Viruses;Duplodnaviria;Heunggongvirae;Uroviricota;Caudoviricetes
IMGVR_UViG_3300049988_000245	huge_phage_2983	265895	Camargo.et.al.2023	Host-associated;Plants;Phyllosphere	Plants-related	0.560428	Medium-quality	Genome-fragment	Yes	/	Yes	Viruses;Duplodnaviria;Heunggongvirae;Uroviricota;Caudoviricetes
IMGVR_UViG_3300034374_009547	huge_phage_2987	240421	Camargo.et.al.2023	Environmental;Aquatic;Marine	Marine	0.349296	Medium-quality	Genome-fragment	Yes	/	Yes	Viruses;Duplodnaviria;Heunggongvirae;Uroviricota;Caudoviricetes
IMGVR_UViG_3300047160_036266	huge_phage_2990	343421	Camargo.et.al.2023	Environmental;Terrestrial;Soil	Soil	0.557531	High-quality	High-quality	Yes	/	Yes	Viruses;Duplodnaviria;Heunggongvirae;Uroviricota;Caudoviricetes
IMGVR_UViG_3300025018_000093	huge_phage_2992	261416	Camargo.et.al.2023	Environmental;Aquatic;Deep subsurface	Deep subsurface	0.556569	Medium-quality	Genome-fragment	Yes	/	Yes	Viruses;Duplodnaviria;Heunggongvirae;Uroviricota;Caudoviricetes
IMGVR_UViG_3300047321_000298	huge_phage_2994	245517	Camargo.et.al.2023	Host-associated;Plants;Roots	Plants-related	0.54604	Complete	High-quality	Yes	/	Yes	Viruses;Duplodnaviria;Heunggongvirae;Uroviricota;Caudoviricetes
IMGVR_UViG_3300028920_000022	huge_phage_2996	458729	Camargo.et.al.2023	Environmental;Aquatic;Marine	Marine	0.395283	High-quality	High-quality	Yes	/	Yes	Viruses;Duplodnaviria;Heunggongvirae;Uroviricota;Caudoviricetes
IMGVR_UViG_3300020045_006153	huge_phage_2998	353233	Camargo.et.al.2023	Environmental;Aquatic;Freshwater	Freshwater	0.378153	High-quality	High-quality	Yes	/	Yes	Viruses;Duplodnaviria;Heunggongvirae;Uroviricota;Caudoviricetes
IMGVR_UViG_3300001357_000001	huge_phage_2999	241034	Camargo.et.al.2023	Environmental;Aquatic;Non-marine Saline and Alkaline	Non-marine Saline and Alkaline	0.281645	Medium-quality	Genome-fragment	Yes	/	Yes	Viruses;Duplodnaviria;Heunggongvirae;Uroviricota;Caudoviricetes
IMGVR_UViG_3300035208_008180	huge_phage_3005	340072	Camargo.et.al.2023	Engineered;Solid waste;Landfill	Landfill	0.404579	High-quality	High-quality	Yes	/	Yes	Viruses;Duplodnaviria;Heunggongvirae;Uroviricota;Caudoviricetes
IMGVR_UViG_3300009031_000368	huge_phage_3006	231714	Camargo.et.al.2023	Environmental;Aquatic;Freshwater	Freshwater	0.44044	Medium-quality	Genome-fragment	Yes	/	Yes	Viruses;Duplodnaviria;Heunggongvirae;Uroviricota;Caudoviricetes
IMGVR_UViG_3300035034_002581	huge_phage_3007	226021	Camargo.et.al.2023	Environmental;Aquatic;Non-marine Saline and Alkaline	Non-marine Saline and Alkaline	0.413714	Medium-quality	Genome-fragment	Yes	/	Yes	Viruses;Duplodnaviria;Heunggongvirae;Uroviricota;Caudoviricetes
IMGVR_UViG_3300044580_000214	huge_phage_3018	259840	Camargo.et.al.2023	Engineered;Bioreactor;Anaerobic	Bioreactor	0.312812	Medium-quality	Genome-fragment	Yes	/	Yes	Viruses;Duplodnaviria;Heunggongvirae;Uroviricota;Caudoviricetes
IMGVR_UViG_3300025861_000004	huge_phage_3020	273402	Camargo.et.al.2023	Engineered;Bioreactor;Anaerobic	Bioreactor	0.659498	High-quality	High-quality	Yes	/	Yes	Viruses;Duplodnaviria;Heunggongvirae;Uroviricota;Caudoviricetes
IMGVR_UViG_3300014205_000001	huge_phage_3023	391061	Camargo.et.al.2023	Engineered;Solid waste;Landfill	Landfill	0.308586	Complete	High-quality	Yes	/	Yes	Viruses;Duplodnaviria;Heunggongvirae;Uroviricota;Caudoviricetes
IMGVR_UViG_2029527006_000005	huge_phage_3026	361872	Camargo.et.al.2023	Environmental;Terrestrial;Nest	Others	0.377592	High-quality	High-quality	Yes	/	Yes	Viruses;Duplodnaviria;Heunggongvirae;Uroviricota;Caudoviricetes
IMGVR_UViG_3300036770_006893	huge_phage_3027	224357	Camargo.et.al.2023	Environmental;Aquatic;Deep subsurface	Deep subsurface	0.357658	High-quality	High-quality	Yes	/	Yes	Viruses;Duplodnaviria;Heunggongvirae;Uroviricota;Caudoviricetes
IMGVR_UViG_3300020172_001601	huge_phage_3028	340341	Camargo.et.al.2023	Environmental;Aquatic;Freshwater	Freshwater	0.478212	Medium-quality	Genome-fragment	Yes	/	Yes	Viruses;Duplodnaviria;Heunggongvirae;Uroviricota;Caudoviricetes
IMGVR_UViG_3300046318_000318	huge_phage_3029	208612	Camargo.et.al.2023	Environmental;Aquatic;Freshwater	Freshwater	0.406055	Medium-quality	Genome-fragment	Yes	/	Yes	Viruses;Duplodnaviria;Heunggongvirae;Uroviricota;Caudoviricetes
IMGVR_UViG_3300042561_002102	huge_phage_3035	297819	Camargo.et.al.2023	Environmental;Aquatic;Freshwater	Freshwater	0.335546	Medium-quality	Genome-fragment	Yes	/	Yes	Viruses;Duplodnaviria;Heunggongvirae;Uroviricota;Caudoviricetes
IMGVR_UViG_3300037781_000042	huge_phage_3037	211581	Camargo.et.al.2023	Environmental;Aquatic;Non-marine Saline and Alkaline	Non-marine Saline and Alkaline	0.272624	Medium-quality	Genome-fragment	Yes	/	Yes	Viruses;Duplodnaviria;Heunggongvirae;Uroviricota;Caudoviricetes
IMGVR_UViG_3300028592_000005	huge_phage_3038	212409	Camargo.et.al.2023	Environmental;Terrestrial;Soil	Soil	0.495525	High-quality	High-quality	Yes	/	Yes	Viruses;Duplodnaviria;Heunggongvirae;Uroviricota;Caudoviricetes
IMGVR_UViG_3300028840_001395	huge_phage_3041	435804	Camargo.et.al.2023	Environmental;Aquatic;Marine	Marine	0.619981	Complete	High-quality	Yes	/	Yes	Viruses;Duplodnaviria;Heunggongvirae;Uroviricota;Caudoviricetes
IMGVR_UViG_3300007803_000005	huge_phage_3043	207443	Camargo.et.al.2023	Host-associated;Human;Digestive system	Animal digestive system	0.315692	High-quality	High-quality	Yes	/	Yes	Viruses;Duplodnaviria;Heunggongvirae;Uroviricota;Caudoviricetes
IMGVR_UViG_3300034126_000020	huge_phage_3046	276810	Camargo.et.al.2023	Environmental;Terrestrial;Soil	Soil	0.541801	Complete	High-quality	Yes	/	Yes	Viruses;Duplodnaviria;Heunggongvirae;Uroviricota;Caudoviricetes
IMGVR_UViG_3300011187_000002	huge_phage_3051	200154	Camargo.et.al.2023	Environmental;Aquatic;Non-marine Saline and Alkaline	Non-marine Saline and Alkaline	0.515923	Medium-quality	Genome-fragment	Yes	/	Yes	Viruses;Duplodnaviria;Heunggongvirae;Uroviricota;Caudoviricetes
IMGVR_UViG_3300012943_000001	huge_phage_3052	205462	Camargo.et.al.2023	Environmental;Terrestrial;Soil	Soil	0.452088	Complete	High-quality	Yes	/	Yes	Viruses;Duplodnaviria;Heunggongvirae;Uroviricota;Caudoviricetes
IMGVR_UViG_3300032280_000442	huge_phage_3059	308574	Camargo.et.al.2023	Environmental;Aquatic;Freshwater	Freshwater	0.315075	Complete	High-quality	Yes	/	Yes	Viruses;Duplodnaviria;Heunggongvirae;Uroviricota;Caudoviricetes
IMGVR_UViG_3300024262_000013	huge_phage_3060	223235	Camargo.et.al.2023	Environmental;Aquatic;Marine	Marine	0.324313	Medium-quality	Genome-fragment	Yes	/	Yes	Viruses;Duplodnaviria;Heunggongvirae;Uroviricota;Caudoviricetes
IMGVR_UViG_3300027710_000011	huge_phage_3065	276772	Camargo.et.al.2023	Environmental;Aquatic;Deep subsurface	Deep subsurface	0.496719	High-quality	High-quality	Yes	/	Yes	Viruses;Duplodnaviria;Heunggongvirae;Uroviricota;Caudoviricetes
IMGVR_UViG_3300028887_000069	huge_phage_3077	235679	Camargo.et.al.2023	Host-associated;Mammals;Digestive system	Animal digestive system	0.420793	Medium-quality	Genome-fragment	Yes	/	Yes	Viruses;Duplodnaviria;Heunggongvirae;Uroviricota;Caudoviricetes
IMGVR_UViG_3300037455_000372	huge_phage_3078	355392	Camargo.et.al.2023	Host-associated;Mammals;Digestive system	Animal digestive system	0.493185	Medium-quality	Genome-fragment	Yes	/	Yes	Viruses;Duplodnaviria;Heunggongvirae;Uroviricota;Caudoviricetes
IMGVR_UViG_3300017917_000952	huge_phage_3084	206751	Camargo.et.al.2023	Environmental;Aquatic;Freshwater	Freshwater	0.41061	Medium-quality	Genome-fragment	Yes	/	Yes	Viruses;Duplodnaviria;Heunggongvirae;Uroviricota;Caudoviricetes
IMGVR_UViG_3300020471_000006	huge_phage_3089	202519	Camargo.et.al.2023	Environmental;Aquatic;Marine	Marine	0.38305	High-quality	High-quality	Yes	/	Yes	Viruses;Duplodnaviria;Heunggongvirae;Uroviricota;Caudoviricetes
IMGVR_UViG_3300025778_000009	huge_phage_3090	223239	Camargo.et.al.2023	Environmental;Aquatic;Freshwater	Freshwater	0.347744	High-quality	High-quality	Yes	/	Yes	Viruses;Duplodnaviria;Heunggongvirae;Uroviricota;Caudoviricetes
IMGVR_UViG_3300025098_005131	huge_phage_3097	273215	Camargo.et.al.2023	Environmental;Aquatic;Marine	Marine	0.320425	High-quality	High-quality	Yes	/	Yes	Viruses;Duplodnaviria;Heunggongvirae;Uroviricota;Caudoviricetes
IMGVR_UViG_3300000976_000008	huge_phage_3098	408349	Camargo.et.al.2023	Host-associated;Algae;Green algae	Others	0.429086	High-quality	High-quality	Yes	/	Yes	Viruses;Duplodnaviria;Heunggongvirae;Uroviricota;Caudoviricetes
IMGVR_UViG_3300024270_000002	huge_phage_3099	243521	Camargo.et.al.2023	Host-associated;Mammals;Digestive system	Animal digestive system	0.377043	High-quality	High-quality	Yes	/	Yes	Viruses;Duplodnaviria;Heunggongvirae;Uroviricota;Caudoviricetes
IMGVR_UViG_3300031857_000010	huge_phage_3100	216699	Camargo.et.al.2023	Environmental;Aquatic;Freshwater	Freshwater	0.286277	Medium-quality	Genome-fragment	Yes	/	Yes	Viruses;Duplodnaviria;Heunggongvirae;Uroviricota;Caudoviricetes
IMGVR_UViG_3300042923_001036	huge_phage_3103	254273	Camargo.et.al.2023	Environmental;Terrestrial;Soil	Soil	0.419986	High-quality	High-quality	Yes	/	Yes	Viruses;Duplodnaviria;Heunggongvirae;Uroviricota;Caudoviricetes
IMGVR_UViG_3300020195_000009	huge_phage_3104	286005	Camargo.et.al.2023	Environmental;Aquatic;Freshwater	Freshwater	0.571829	Medium-quality	Genome-fragment	Yes	/	Yes	Viruses;Duplodnaviria;Heunggongvirae;Uroviricota;Caudoviricetes
IMGVR_UViG_3300027983_002388	huge_phage_3105	230230	Camargo.et.al.2023	Environmental;Aquatic;Freshwater	Freshwater	0.436967	High-quality	High-quality	Yes	/	Yes	Viruses;Duplodnaviria;Heunggongvirae;Uroviricota;Caudoviricetes
IMGVR_UViG_3300032245_001860	huge_phage_3106	315852	Camargo.et.al.2023	Environmental;Aquatic;Freshwater	Freshwater	0.332513	High-quality	High-quality	Yes	/	Yes	Viruses;Duplodnaviria;Heunggongvirae;Uroviricota;Caudoviricetes
IMGVR_UViG_3300028888_000049	huge_phage_3108	263336	Camargo.et.al.2023	Host-associated;Mammals;Digestive system	Animal digestive system	0.280858	High-quality	High-quality	Yes	/	Yes	Viruses;Duplodnaviria;Heunggongvirae;Uroviricota;Caudoviricetes
IMGVR_UViG_3300034062_005355	huge_phage_3110	209807	Camargo.et.al.2023	Environmental;Aquatic;Freshwater	Freshwater	0.31518	Medium-quality	Genome-fragment	Yes	/	Yes	Viruses;Duplodnaviria;Heunggongvirae;Uroviricota;Caudoviricetes
IMGVR_UViG_3300029194_000001	huge_phage_3113	216714	Camargo.et.al.2023	Host-associated;Human;Digestive system	Animal digestive system	0.326804	High-quality	High-quality	Yes	/	Yes	Viruses;Duplodnaviria;Heunggongvirae;Uroviricota;Caudoviricetes
IMGVR_UViG_3300027777_000022	huge_phage_3114	348042	Camargo.et.al.2023	Environmental;Aquatic;Freshwater	Freshwater	0.436896	Medium-quality	Genome-fragment	Yes	/	Yes	Viruses;Duplodnaviria;Heunggongvirae;Uroviricota;Caudoviricetes
IMGVR_UViG_3300027770_000026	huge_phage_3118	265892	Camargo.et.al.2023	Environmental;Aquatic;Freshwater	Freshwater	0.43515	Medium-quality	Genome-fragment	Yes	/	Yes	Viruses;Duplodnaviria;Heunggongvirae;Uroviricota;Caudoviricetes
IMGVR_UViG_3300017722_005389	huge_phage_3120	271677	Camargo.et.al.2023	Environmental;Aquatic;Freshwater	Freshwater	0.294927	Medium-quality	Genome-fragment	Yes	/	Yes	Viruses;Duplodnaviria;Heunggongvirae;Uroviricota;Caudoviricetes
IMGVR_UViG_3300034355_001008	huge_phage_3128	213894	Camargo.et.al.2023	Environmental;Aquatic;Freshwater	Freshwater	0.326124	High-quality	High-quality	Yes	/	Yes	Viruses;Duplodnaviria;Heunggongvirae;Uroviricota;Caudoviricetes
IMGVR_UViG_3300031555_004037	huge_phage_3129	323839	Camargo.et.al.2023	Host-associated;Mammals;Digestive system	Animal digestive system	0.27141	High-quality	High-quality	Yes	/	Yes	Viruses;Duplodnaviria;Heunggongvirae;Uroviricota;Caudoviricetes
IMGVR_UViG_3300026549_000029	huge_phage_3130	287868	Camargo.et.al.2023	Host-associated;Mammals;Digestive system	Animal digestive system	0.276998	High-quality	High-quality	Yes	/	Yes	Viruses;Duplodnaviria;Heunggongvirae;Uroviricota;Caudoviricetes
IMGVR_UViG_3300028864_000017	huge_phage_3131	205676	Camargo.et.al.2023	Environmental;Terrestrial;Soil	Soil	0.244277	Low-quality	Genome-fragment	Yes	/	Yes	Viruses;Duplodnaviria;Heunggongvirae;Uroviricota;Caudoviricetes
IMGVR_UViG_3300044878_000136	huge_phage_3135	263994	Camargo.et.al.2023	Engineered;Built environment;Canal	Built environment	0.540008	High-quality	High-quality	Yes	/	Yes	Viruses;Duplodnaviria;Heunggongvirae;Uroviricota;Caudoviricetes
IMGVR_UViG_3300045988_172955	huge_phage_3136	219136	Camargo.et.al.2023	Host-associated;Mammals: Human;Digestive system	Animal digestive system	0.305231	Medium-quality	Genome-fragment	Yes	/	Yes	Viruses;Duplodnaviria;Heunggongvirae;Uroviricota;Caudoviricetes
IMGVR_UViG_3300032218_003260	huge_phage_3138	201979	Camargo.et.al.2023	Environmental;Aquatic;Freshwater	Freshwater	0.544141	Complete	High-quality	Yes	/	Yes	Viruses;Duplodnaviria;Heunggongvirae;Uroviricota;Caudoviricetes
IMGVR_UViG_3300050120_000230	huge_phage_3145	415409	Camargo.et.al.2023	Environmental;Terrestrial;Soil	Soil	0.554203	High-quality	High-quality	Yes	/	Yes	Viruses;Duplodnaviria;Heunggongvirae;Uroviricota;Caudoviricetes
IMGVR_UViG_3300048854_000081	huge_phage_3149	350036	Camargo.et.al.2023	Environmental;Terrestrial;Soil	Soil	0.424611	High-quality	High-quality	Yes	/	Yes	Viruses;Duplodnaviria;Heunggongvirae;Uroviricota;Caudoviricetes
IMGVR_UViG_3300047557_002530	huge_phage_3152	210923	Camargo.et.al.2023	Environmental;Aquatic;Freshwater	Freshwater	0.365892	Complete	High-quality	Yes	/	Yes	Viruses;Duplodnaviria;Heunggongvirae;Uroviricota;Caudoviricetes
IMGVR_UViG_3300029288_006769	huge_phage_3153	424144	Camargo.et.al.2023	Engineered;Solid waste;Landfill	Landfill	0.35177	High-quality	High-quality	Yes	/	Yes	Viruses;Duplodnaviria;Heunggongvirae;Uroviricota;Caudoviricetes
IMGVR_UViG_3300042914_002678	huge_phage_3155	340635	Camargo.et.al.2023	Environmental;Aquatic;Freshwater	Freshwater	0.361827	High-quality	High-quality	Yes	/	Yes	Viruses;Duplodnaviria;Heunggongvirae;Uroviricota;Caudoviricetes
IMGVR_UViG_3300042540_001399	huge_phage_3165	290887	Camargo.et.al.2023	Environmental;Aquatic;Freshwater	Freshwater	0.311279	High-quality	High-quality	Yes	/	Yes	Viruses;Duplodnaviria;Heunggongvirae;Uroviricota;Caudoviricetes
IMGVR_UViG_3300027749_000034	huge_phage_3169	293266	Camargo.et.al.2023	Environmental;Aquatic;Freshwater	Freshwater	0.417474	Medium-quality	Genome-fragment	Yes	/	Yes	Viruses;Duplodnaviria;Heunggongvirae;Uroviricota;Caudoviricetes
IMGVR_UViG_3300023313_000001	huge_phage_3171	229507	Camargo.et.al.2023	Environmental;Aquatic;Marine	Marine	0.385095	Medium-quality	Genome-fragment	Yes	/	Yes	Viruses;Duplodnaviria;Heunggongvirae;Uroviricota;Caudoviricetes
IMGVR_UViG_3300008485_000061	huge_phage_3173	244192	Camargo.et.al.2023	Host-associated;Human;Digestive system	Animal digestive system	0.334409	High-quality	High-quality	Yes	/	Yes	Viruses;Duplodnaviria;Heunggongvirae;Uroviricota;Caudoviricetes
IMGVR_UViG_3300035670_000010	huge_phage_3174	200775	Camargo.et.al.2023	Environmental;Aquatic;Deep subsurface	Deep subsurface	0.299325	Medium-quality	Genome-fragment	Yes	/	Yes	Viruses;Duplodnaviria;Heunggongvirae;Uroviricota;Caudoviricetes
IMGVR_UViG_3300021376_000006	huge_phage_3177	337915	Camargo.et.al.2023	Environmental;Aquatic;Freshwater	Freshwater	0.395537	Medium-quality	Genome-fragment	Yes	/	Yes	Viruses;Duplodnaviria;Heunggongvirae;Uroviricota;Caudoviricetes
IMGVR_UViG_3300021387_000796	huge_phage_3178	218066	Camargo.et.al.2023	Host-associated;Mammals;Digestive system	Animal digestive system	0.293833	High-quality	High-quality	Yes	/	Yes	Viruses;Duplodnaviria;Heunggongvirae;Uroviricota;Caudoviricetes
IMGVR_UViG_3300045911_000602	huge_phage_3180	288343	Camargo.et.al.2023	Environmental;Aquatic;Thermal springs	Others	0.358948	Complete	High-quality	Yes	/	Yes	Viruses;Duplodnaviria;Heunggongvirae;Uroviricota;Caudoviricetes
IMGVR_UViG_3300045988_167287	huge_phage_3184	268054	Camargo.et.al.2023	Host-associated;Mammals: Human;Digestive system	Animal digestive system	0.309997	Medium-quality	Genome-fragment	Yes	/	Yes	Viruses;Duplodnaviria;Heunggongvirae;Uroviricota;Caudoviricetes
IMGVR_UViG_3300023174_000034	huge_phage_3189	373949	Camargo.et.al.2023	Environmental;Aquatic;Freshwater	Freshwater	0.45061	High-quality	High-quality	Yes	/	Yes	Viruses;Duplodnaviria;Heunggongvirae;Uroviricota;Caudoviricetes
IMGVR_UViG_3300042010_000129	huge_phage_3195	311964	Camargo.et.al.2023	Host-associated;Plants;Roots	Plants-related	0.507873	Complete	High-quality	Yes	/	Yes	Viruses;Duplodnaviria;Heunggongvirae;Uroviricota;Caudoviricetes
IMGVR_UViG_3300007186_000001	huge_phage_3196	326144	Camargo.et.al.2023	Host-associated;Human;Digestive system	Animal digestive system	0.348061	Complete	High-quality	Yes	/	Yes	Viruses;Duplodnaviria;Heunggongvirae;Uroviricota;Caudoviricetes
IMGVR_UViG_3300014208_000027	huge_phage_3197	203498	Camargo.et.al.2023	Environmental;Aquatic;Deep subsurface	Deep subsurface	0.340745	High-quality	High-quality	Yes	/	Yes	Viruses;Duplodnaviria;Heunggongvirae;Uroviricota;Caudoviricetes
IMGVR_UViG_3300011008_000016	huge_phage_3199	244309	Camargo.et.al.2023	Host-associated;Mammals;Digestive system	Animal digestive system	0.373224	High-quality	High-quality	Yes	/	Yes	Viruses;Duplodnaviria;Heunggongvirae;Uroviricota;Caudoviricetes
IMGVR_UViG_3300048597_000634	huge_phage_3203	205544	Camargo.et.al.2023	Environmental;Aquatic;Freshwater	Freshwater	0.460242	High-quality	High-quality	Yes	/	Yes	Viruses;Duplodnaviria;Heunggongvirae;Uroviricota;Caudoviricetes
IMGVR_UViG_3300007514_000787	huge_phage_3206	237096	Camargo.et.al.2023	Environmental;Aquatic;Marine	Marine	0.310566	Complete	High-quality	Yes	/	Yes	Viruses;Duplodnaviria;Heunggongvirae;Uroviricota;Caudoviricetes
IMGVR_UViG_3300029305_002265	huge_phage_3210	341764	Camargo.et.al.2023	Host-associated;Mammals;Digestive system	Animal digestive system	0.392543	High-quality	High-quality	Yes	/	Yes	Viruses;Duplodnaviria;Heunggongvirae;Uroviricota;Caudoviricetes
IMGVR_UViG_3300006320_000261	huge_phage_3211	295082	Camargo.et.al.2023	Host-associated;Human;Digestive system	Animal digestive system	0.310124	Complete	High-quality	Yes	/	Yes	Viruses;Duplodnaviria;Heunggongvirae;Uroviricota;Caudoviricetes
IMGVR_UViG_3300015265_000001	huge_phage_3212	226985	Camargo.et.al.2023	Host-associated;Plants;Roots	Plants-related	0.51195	Complete	High-quality	Yes	/	Yes	Viruses;Duplodnaviria;Heunggongvirae;Uroviricota;Caudoviricetes
IMGVR_UViG_3300031261_000001	huge_phage_3215	229851	Camargo.et.al.2023	Environmental;Terrestrial;Soil	Soil	0.324641	Complete	High-quality	Yes	/	Yes	Viruses;Duplodnaviria;Heunggongvirae;Uroviricota;Caudoviricetes
IMGVR_UViG_3300023296_001671	huge_phage_3216	298973	Camargo.et.al.2023	Environmental;Aquatic;Non-marine Saline and Alkaline	Non-marine Saline and Alkaline	0.381914	Medium-quality	Genome-fragment	Yes	/	Yes	Viruses;Duplodnaviria;Heunggongvirae;Uroviricota;Caudoviricetes
IMGVR_UViG_3300028840_002431	huge_phage_3217	416539	Camargo.et.al.2023	Environmental;Aquatic;Marine	Marine	0.550321	Medium-quality	Genome-fragment	Yes	/	Yes	Viruses;Duplodnaviria;Heunggongvirae;Uroviricota;Caudoviricetes
IMGVR_UViG_3300038393_003162	huge_phage_3219	253022	Camargo.et.al.2023	Environmental;Terrestrial;Soil	Soil	0.500609	Low-quality	Genome-fragment	Yes	/	Yes	Viruses;Duplodnaviria;Heunggongvirae;Uroviricota;Caudoviricetes
IMGVR_UViG_3300017388_000001	huge_phage_3224	435946	Camargo.et.al.2023	Environmental;Aquatic;Deep subsurface	Deep subsurface	0.502684	High-quality	High-quality	Yes	/	Yes	Viruses;Duplodnaviria;Heunggongvirae;Uroviricota;Caudoviricetes
IMGVR_UViG_3300017528_000567	huge_phage_3225	255478	Camargo.et.al.2023	Host-associated;Plants;Roots	Plants-related	0.586195	Medium-quality	Genome-fragment	Yes	/	Yes	Viruses;Duplodnaviria;Heunggongvirae;Uroviricota;Caudoviricetes
IMGVR_UViG_3300023170_004399	huge_phage_3227	269598	Camargo.et.al.2023	Environmental;Aquatic;Marine	Marine	0.334925	Medium-quality	Genome-fragment	Yes	/	Yes	Viruses;Duplodnaviria;Heunggongvirae;Uroviricota;Caudoviricetes
IMGVR_UViG_3300044701_002789	huge_phage_3230	258362	Camargo.et.al.2023	Environmental;Aquatic;Freshwater	Freshwater	0.353814	Complete	High-quality	Yes	/	Yes	Viruses;Duplodnaviria;Heunggongvirae;Uroviricota;Caudoviricetes
IMGVR_UViG_3300031992_000002	huge_phage_3232	433895	Camargo.et.al.2023	Host-associated;Mammals;Digestive system	Animal digestive system	0.466235	Complete	High-quality	Yes	/	Yes	Viruses;Duplodnaviria;Heunggongvirae;Uroviricota;Caudoviricetes
IMGVR_UViG_3300021387_000688	huge_phage_3235	397601	Camargo.et.al.2023	Host-associated;Mammals;Digestive system	Animal digestive system	0.343379	Complete	High-quality	Yes	/	Yes	Viruses;Duplodnaviria;Heunggongvirae;Uroviricota;Caudoviricetes
IMGVR_UViG_3300042507_004106	huge_phage_3242	207776	Camargo.et.al.2023	Environmental;Aquatic;Freshwater	Freshwater	0.372218	Complete	High-quality	Yes	/	Yes	Viruses;Duplodnaviria;Heunggongvirae;Uroviricota;Caudoviricetes
IMGVR_UViG_3300032665_000003	huge_phage_3243	314240	Camargo.et.al.2023	Environmental;Aquatic;Freshwater	Freshwater	0.408376	Medium-quality	Genome-fragment	Yes	/	Yes	Viruses;Duplodnaviria;Heunggongvirae;Uroviricota;Caudoviricetes
IMGVR_UViG_3300007123_000167	huge_phage_3247	315427	Camargo.et.al.2023	Host-associated;Human;Digestive system	Animal digestive system	0.307	High-quality	High-quality	Yes	/	Yes	Viruses;Duplodnaviria;Heunggongvirae;Uroviricota;Caudoviricetes
IMGVR_UViG_3300021399_000099	huge_phage_3252	216910	Camargo.et.al.2023	Host-associated;Mammals;Digestive system	Animal digestive system	0.417256	Medium-quality	Genome-fragment	Yes	/	Yes	Viruses;Duplodnaviria;Heunggongvirae;Uroviricota;Caudoviricetes
IMGVR_UViG_3300007194_000002	huge_phage_3254	247949	Camargo.et.al.2023	Host-associated;Human;Digestive system	Animal digestive system	0.359683	High-quality	High-quality	Yes	/	Yes	Viruses;Duplodnaviria;Heunggongvirae;Uroviricota;Caudoviricetes
IMGVR_UViG_3300023196_003249	huge_phage_3255	360451	Camargo.et.al.2023	Environmental;Aquatic;Sediment	Others	0.324665	Complete	High-quality	Yes	/	Yes	Viruses;Duplodnaviria;Heunggongvirae;Uroviricota;Caudoviricetes
IMGVR_UViG_3300045988_066739	huge_phage_3256	268764	Camargo.et.al.2023	Host-associated;Mammals: Human;Digestive system	Animal digestive system	0.3341	High-quality	High-quality	Yes	/	Yes	Viruses;Duplodnaviria;Heunggongvirae;Uroviricota;Caudoviricetes
IMGVR_UViG_3300036985_003045	huge_phage_3263	201736	Camargo.et.al.2023	Environmental;Aquatic;Freshwater	Freshwater	0.316463	High-quality	High-quality	Yes	/	Yes	Viruses;Duplodnaviria;Heunggongvirae;Uroviricota;Caudoviricetes
IMGVR_UViG_3300042402_002792	huge_phage_3266	364317	Camargo.et.al.2023	Environmental;Aquatic;Freshwater	Freshwater	0.37937	Complete	High-quality	Yes	/	Yes	Viruses;Duplodnaviria;Heunggongvirae;Uroviricota;Caudoviricetes
IMGVR_UViG_3300037047_000246	huge_phage_3276	362732	Camargo.et.al.2023	Environmental;Aquatic;Deep subsurface	Deep subsurface	0.57339	Medium-quality	Genome-fragment	Yes	/	Yes	Viruses;Duplodnaviria;Heunggongvirae;Uroviricota;Caudoviricetes
IMGVR_UViG_3300047445_000186	huge_phage_3277	331776	Camargo.et.al.2023	Host-associated;Plants;Roots	Plants-related	0.542462	High-quality	High-quality	Yes	/	Yes	Viruses;Duplodnaviria;Heunggongvirae;Uroviricota;Caudoviricetes
IMGVR_UViG_3300035498_000530	huge_phage_3278	222731	Camargo.et.al.2023	Host-associated;Mammals;Digestive system	Animal digestive system	0.303433	Complete	High-quality	Yes	/	Yes	Viruses;Duplodnaviria;Heunggongvirae;Uroviricota;Caudoviricetes
IMGVR_UViG_3300049740_002155	huge_phage_3279	263379	Camargo.et.al.2023	Environmental;Aquatic;Marine	Marine	0.33814	High-quality	High-quality	Yes	/	Yes	Viruses;Duplodnaviria;Heunggongvirae;Uroviricota;Caudoviricetes
IMGVR_UViG_3300014205_000172	huge_phage_3282	237171	Camargo.et.al.2023	Engineered;Solid waste;Landfill	Landfill	0.495912	High-quality	High-quality	Yes	/	Yes	Viruses;Duplodnaviria;Heunggongvirae;Uroviricota;Caudoviricetes
IMGVR_UViG_3300008304_000002	huge_phage_3288	202265	Camargo.et.al.2023	Host-associated;Human;Digestive system	Animal digestive system	0.392015	Medium-quality	Genome-fragment	Yes	/	Yes	Viruses;Duplodnaviria;Heunggongvirae;Uroviricota;Caudoviricetes
IMGVR_UViG_3300037067_027684	huge_phage_3291	246684	Camargo.et.al.2023	Engineered;Solid waste;Landfill	Landfill	0.421624	High-quality	High-quality	Yes	/	Yes	Viruses;Duplodnaviria;Heunggongvirae;Uroviricota;Caudoviricetes
IMGVR_UViG_3300028364_000014	huge_phage_3296	237910	Camargo.et.al.2023	Environmental;Aquatic;Non-marine Saline and Alkaline	Non-marine Saline and Alkaline	0.327977	High-quality	High-quality	Yes	/	Yes	Viruses;Duplodnaviria;Heunggongvirae;Uroviricota;Caudoviricetes
IMGVR_UViG_3300028591_000080	huge_phage_3297	230252	Camargo.et.al.2023	Host-associated;Mammals;Digestive system	Animal digestive system	0.281565	High-quality	High-quality	Yes	/	Yes	Viruses;Duplodnaviria;Heunggongvirae;Uroviricota;Caudoviricetes
IMGVR_UViG_3300043399_000297	huge_phage_3304	244022	Camargo.et.al.2023	Environmental;Aquatic;Freshwater	Freshwater	0.387756	Medium-quality	Genome-fragment	Yes	/	Yes	Viruses;Duplodnaviria;Heunggongvirae;Uroviricota;Caudoviricetes
IMGVR_UViG_3300050159_000048	huge_phage_3305	206048	Camargo.et.al.2023	Environmental;Terrestrial;Plant litter	Others	0.499233	Medium-quality	Genome-fragment	Yes	/	Yes	Viruses;Duplodnaviria;Heunggongvirae;Uroviricota;Caudoviricetes
IMGVR_UViG_3300046170_000519	huge_phage_3308	205857	Camargo.et.al.2023	Environmental;Aquatic;Marine	Marine	0.339352	High-quality	High-quality	Yes	/	Yes	Viruses;Duplodnaviria;Heunggongvirae;Uroviricota;Caudoviricetes
IMGVR_UViG_3300043418_000072	huge_phage_3309	354098	Camargo.et.al.2023	Environmental;Aquatic;Freshwater	Freshwater	0.435159	Medium-quality	Genome-fragment	Yes	/	Yes	Viruses;Duplodnaviria;Heunggongvirae;Uroviricota;Caudoviricetes
IMGVR_UViG_3300033182_000674	huge_phage_3314	219676	Camargo.et.al.2023	Environmental;Aquatic;Marine	Marine	0.339514	High-quality	High-quality	Yes	/	Yes	Viruses;Duplodnaviria;Heunggongvirae;Uroviricota;Caudoviricetes
IMGVR_UViG_3300027668_000008	huge_phage_3315	306714	Camargo.et.al.2023	Environmental;Aquatic;Marine	Marine	0.359139	Medium-quality	Genome-fragment	Yes	/	Yes	Viruses;Duplodnaviria;Heunggongvirae;Uroviricota;Caudoviricetes
IMGVR_UViG_3300017963_000189	huge_phage_3316	288180	Camargo.et.al.2023	Environmental;Aquatic;Non-marine Saline and Alkaline	Non-marine Saline and Alkaline	0.348168	High-quality	High-quality	Yes	/	Yes	Viruses;Duplodnaviria;Heunggongvirae;Uroviricota;Caudoviricetes
IMGVR_UViG_3300014293_000003	huge_phage_3321	216045	Camargo.et.al.2023	Host-associated;Mammals: Human;Digestive system	Animal digestive system	0.329311	High-quality	High-quality	Yes	/	Yes	Viruses;Duplodnaviria;Heunggongvirae;Uroviricota;Caudoviricetes
IMGVR_UViG_3300036884_000676	huge_phage_3329	321145	Camargo.et.al.2023	Environmental;Terrestrial;Soil	Soil	0.302022	Medium-quality	Genome-fragment	Yes	/	Yes	Viruses;Duplodnaviria;Heunggongvirae;Uroviricota;Caudoviricetes
IMGVR_UViG_3300028833_004347	huge_phage_3331	353905	Camargo.et.al.2023	Host-associated;Mammals;Digestive system	Animal digestive system	0.344016	High-quality	High-quality	Yes	/	Yes	Viruses;Duplodnaviria;Heunggongvirae;Uroviricota;Caudoviricetes
IMGVR_UViG_3300042402_002564	huge_phage_3332	246502	Camargo.et.al.2023	Environmental;Aquatic;Freshwater	Freshwater	0.337896	Complete	High-quality	Yes	/	Yes	Viruses;Duplodnaviria;Heunggongvirae;Uroviricota;Caudoviricetes
IMGVR_UViG_3300045988_181067	huge_phage_3334	389222	Camargo.et.al.2023	Host-associated;Mammals: Human;Digestive system	Animal digestive system	0.479665	High-quality	High-quality	Yes	/	Yes	Viruses;Duplodnaviria;Heunggongvirae;Uroviricota;Caudoviricetes
IMGVR_UViG_3300012277_000001	huge_phage_3336	307943	Camargo.et.al.2023	Engineered;Built environment;City	Built environment	0.520135	High-quality	High-quality	Yes	/	Yes	Viruses;Duplodnaviria;Heunggongvirae;Uroviricota;Caudoviricetes
IMGVR_UViG_3300049460_000312	huge_phage_3337	283373	Camargo.et.al.2023	Host-associated;Plants;Roots	Plants-related	0.563762	Complete	High-quality	Yes	/	Yes	Viruses;Duplodnaviria;Heunggongvirae;Uroviricota;Caudoviricetes
IMGVR_UViG_3300024308_000302	huge_phage_3340	290157	Camargo.et.al.2023	Environmental;Terrestrial;Deep subsurface	Deep subsurface	0.322039	High-quality	High-quality	Yes	/	Yes	Viruses;Duplodnaviria;Heunggongvirae;Uroviricota;Caudoviricetes
IMGVR_UViG_3300007803_000004	huge_phage_3343	261775	Camargo.et.al.2023	Host-associated;Human;Digestive system	Animal digestive system	0.340575	High-quality	High-quality	Yes	/	Yes	Viruses;Duplodnaviria;Heunggongvirae;Uroviricota;Caudoviricetes
IMGVR_UViG_3300036770_007621	huge_phage_3346	371226	Camargo.et.al.2023	Environmental;Aquatic;Deep subsurface	Deep subsurface	0.333495	Complete	High-quality	Yes	/	Yes	Viruses;Duplodnaviria;Heunggongvirae;Uroviricota;Caudoviricetes
IMGVR_UViG_3300009031_000221	huge_phage_3347	536053	Camargo.et.al.2023	Environmental;Aquatic;Freshwater	Freshwater	0.523663	High-quality	High-quality	Yes	/	Yes	Viruses;Duplodnaviria;Heunggongvirae;Uroviricota;Caudoviricetes
IMGVR_UViG_3300013104_000001	huge_phage_3348	287406	Camargo.et.al.2023	Host-associated;Plants;Roots	Plants-related	0.468097	Complete	High-quality	Yes	/	Yes	Viruses;Duplodnaviria;Heunggongvirae;Uroviricota;Caudoviricetes
IMGVR_UViG_3300046499_000850	huge_phage_3352	273341	Camargo.et.al.2023	Host-associated;Plants;Roots	Plants-related	0.535726	Complete	High-quality	Yes	/	Yes	Viruses;Duplodnaviria;Heunggongvirae;Uroviricota;Caudoviricetes
IMGVR_UViG_3300035670_000001	huge_phage_3367	435856	Camargo.et.al.2023	Environmental;Aquatic;Deep subsurface	Deep subsurface	0.462685	Complete	High-quality	Yes	/	Yes	Viruses;Duplodnaviria;Heunggongvirae;Uroviricota;Caudoviricetes
IMGVR_UViG_3300025030_000038	huge_phage_3368	485040	Camargo.et.al.2023	Environmental;Aquatic;Deep subsurface	Deep subsurface	0.551138	High-quality	High-quality	Yes	/	Yes	Viruses;Duplodnaviria;Heunggongvirae;Uroviricota;Caudoviricetes
IMGVR_UViG_3300010885_076238	huge_phage_3372	204311	Camargo.et.al.2023	Environmental;Aquatic;Freshwater	Freshwater	0.34677	Medium-quality	Genome-fragment	Yes	/	Yes	Viruses;Duplodnaviria;Heunggongvirae;Uroviricota;Caudoviricetes
IMGVR_UViG_3300032214_000715	huge_phage_3374	239163	Camargo.et.al.2023	Environmental;Aquatic;Freshwater	Freshwater	0.397817	Medium-quality	Genome-fragment	Yes	/	Yes	Viruses;Duplodnaviria;Heunggongvirae;Uroviricota;Caudoviricetes
IMGVR_UViG_3300013121_000045	huge_phage_3377	305036	Camargo.et.al.2023	Engineered;WWTP;Activated Sludge	WWTP	0.426163	Complete	High-quality	Yes	/	Yes	Viruses;Duplodnaviria;Heunggongvirae;Uroviricota;Caudoviricetes
IMGVR_UViG_3300023371_000065	huge_phage_3378	220023	Camargo.et.al.2023	Host-associated;Mammals;Digestive system	Animal digestive system	0.383451	High-quality	High-quality	Yes	/	Yes	Viruses;Duplodnaviria;Heunggongvirae;Uroviricota;Caudoviricetes
IMGVR_UViG_3300029305_003178	huge_phage_3379	227229	Camargo.et.al.2023	Host-associated;Mammals;Digestive system	Animal digestive system	0.292062	High-quality	High-quality	Yes	/	Yes	Viruses;Duplodnaviria;Heunggongvirae;Uroviricota;Caudoviricetes
IMGVR_UViG_3300027969_000039	huge_phage_3380	303057	Camargo.et.al.2023	Environmental;Aquatic;Freshwater	Freshwater	0.374286	Medium-quality	Genome-fragment	Yes	/	Yes	Viruses;Duplodnaviria;Heunggongvirae;Uroviricota;Caudoviricetes
IMGVR_UViG_3300044645_002359	huge_phage_3383	201260	Camargo.et.al.2023	Environmental;Aquatic;Freshwater	Freshwater	0.469333	High-quality	High-quality	Yes	/	Yes	Viruses;Duplodnaviria;Heunggongvirae;Uroviricota;Caudoviricetes
IMGVR_UViG_3300044641_009805	huge_phage_3384	278435	Camargo.et.al.2023	Environmental;Aquatic;Freshwater	Freshwater	0.426358	Medium-quality	Genome-fragment	Yes	/	Yes	Viruses;Duplodnaviria;Heunggongvirae;Uroviricota;Caudoviricetes
IMGVR_UViG_3300029134_000163	huge_phage_3389	221898	Camargo.et.al.2023	Host-associated;Human;Digestive system	Animal digestive system	0.333239	High-quality	High-quality	Yes	/	Yes	Viruses;Duplodnaviria;Heunggongvirae;Uroviricota;Caudoviricetes
IMGVR_UViG_3300048854_000232	huge_phage_3392	294599	Camargo.et.al.2023	Environmental;Terrestrial;Soil	Soil	0.594282	High-quality	High-quality	Yes	/	Yes	Viruses;Duplodnaviria;Heunggongvirae;Uroviricota;Caudoviricetes
IMGVR_UViG_3300014208_000025	huge_phage_3397	279228	Camargo.et.al.2023	Environmental;Aquatic;Deep subsurface	Deep subsurface	0.3991	High-quality	High-quality	Yes	/	Yes	Viruses;Duplodnaviria;Heunggongvirae;Uroviricota;Caudoviricetes
IMGVR_UViG_3300018080_000099	huge_phage_3399	264037	Camargo.et.al.2023	Environmental;Aquatic;Non-marine Saline and Alkaline	Non-marine Saline and Alkaline	0.43264	Complete	High-quality	Yes	/	Yes	Viruses;Duplodnaviria;Heunggongvirae;Uroviricota;Caudoviricetes
IMGVR_UViG_3300031998_000008	huge_phage_3400	207929	Camargo.et.al.2023	Host-associated;Mammals;Digestive system	Animal digestive system	0.329608	Medium-quality	Genome-fragment	Yes	/	Yes	Viruses;Duplodnaviria;Heunggongvirae;Uroviricota;Caudoviricetes
IMGVR_UViG_3300020147_000065	huge_phage_3402	221108	Camargo.et.al.2023	Environmental;Terrestrial;Soil	Soil	0.4377	Medium-quality	Genome-fragment	Yes	/	Yes	Viruses;Duplodnaviria;Heunggongvirae;Uroviricota;Caudoviricetes
IMGVR_UViG_3300029305_006500	huge_phage_3409	226673	Camargo.et.al.2023	Host-associated;Mammals;Digestive system	Animal digestive system	0.36141	High-quality	High-quality	Yes	/	Yes	Viruses;Duplodnaviria;Heunggongvirae;Uroviricota;Caudoviricetes
IMGVR_UViG_2785511407_000018	huge_phage_3410	335231	Camargo.et.al.2023	Environmental;Aquatic;Marine	Marine	0.358487	High-quality	High-quality	Yes	/	Yes	Viruses;Duplodnaviria;Heunggongvirae;Uroviricota;Caudoviricetes
IMGVR_UViG_3300033049_000066	huge_phage_3414	293278	Camargo.et.al.2023	Environmental;Aquatic;Marine	Marine	0.416404	Medium-quality	Genome-fragment	Yes	/	Yes	Viruses;Duplodnaviria;Heunggongvirae;Uroviricota;Caudoviricetes
IMGVR_UViG_3300025012_000029	huge_phage_3416	201144	Camargo.et.al.2023	Environmental;Aquatic;Deep subsurface	Deep subsurface	0.343843	High-quality	High-quality	Yes	/	Yes	Viruses;Duplodnaviria;Heunggongvirae;Uroviricota;Caudoviricetes
IMGVR_UViG_3300045988_180880	huge_phage_4196	383949	Camargo.et.al.2023	Host-associated;Mammals: Human;Digestive system	Animal digestive system	0.299342	Complete	High-quality	Yes	/	Yes	Viruses;Duplodnaviria;Heunggongvirae;Uroviricota;Caudoviricetes
IMGVR_UViG_3300037487_000968	huge_phage_3428	210450	Camargo.et.al.2023	Environmental;Aquatic;Freshwater	Freshwater	0.400708	Medium-quality	Genome-fragment	Yes	/	Yes	Viruses;Duplodnaviria;Heunggongvirae;Uroviricota;Caudoviricetes
IMGVR_UViG_3300006568_000007	huge_phage_3429	212460	Camargo.et.al.2023	Host-associated;Human;Digestive system	Animal digestive system	0.328463	High-quality	High-quality	Yes	/	Yes	Viruses;Duplodnaviria;Heunggongvirae;Uroviricota;Caudoviricetes
IMGVR_UViG_3300037722_000745	huge_phage_3430	323174	Camargo.et.al.2023	Environmental;Aquatic;Floodplain	Others	0.563737	Medium-quality	Genome-fragment	Yes	/	Yes	Viruses;Duplodnaviria;Heunggongvirae;Uroviricota;Caudoviricetes
IMGVR_UViG_3300028591_005215	huge_phage_3432	279749	Camargo.et.al.2023	Host-associated;Mammals;Digestive system	Animal digestive system	0.305796	Medium-quality	Genome-fragment	Yes	/	Yes	Viruses;Duplodnaviria;Heunggongvirae;Uroviricota;Caudoviricetes
IMGVR_UViG_3300029402_000234	huge_phage_3435	250027	Camargo.et.al.2023	Host-associated;Human;Digestive system	Animal digestive system	0.343669	High-quality	High-quality	Yes	/	Yes	Viruses;Duplodnaviria;Heunggongvirae;Uroviricota;Caudoviricetes
IMGVR_UViG_3300028898_000109	huge_phage_3436	231559	Camargo.et.al.2023	Engineered;Bioreactor;Aerobic	Bioreactor	0.363432	Complete	High-quality	Yes	/	Yes	Viruses;Duplodnaviria;Heunggongvirae;Uroviricota;Caudoviricetes
IMGVR_UViG_3300020046_004224	huge_phage_3437	204031	Camargo.et.al.2023	Environmental;Aquatic;Freshwater	Freshwater	0.349597	Medium-quality	Genome-fragment	Yes	/	Yes	Viruses;Duplodnaviria;Heunggongvirae;Uroviricota;Caudoviricetes
IMGVR_UViG_3300028886_000037	huge_phage_3440	247923	Camargo.et.al.2023	Host-associated;Mammals;Digestive system	Animal digestive system	0.471771	High-quality	High-quality	Yes	/	Yes	Viruses;Duplodnaviria;Heunggongvirae;Uroviricota;Caudoviricetes
IMGVR_UViG_3300031414_000005	huge_phage_3445	232962	Camargo.et.al.2023	Host-associated;Plants;Phyllosphere	Plants-related	0.51787	Medium-quality	Genome-fragment	Yes	/	Yes	Viruses;Duplodnaviria;Heunggongvirae;Uroviricota;Caudoviricetes
IMGVR_UViG_3300027985_001318	huge_phage_3459	223650	Camargo.et.al.2023	Environmental;Aquatic;Marine	Marine	0.472672	Complete	High-quality	Yes	/	Yes	Viruses;Duplodnaviria;Heunggongvirae;Uroviricota;Caudoviricetes
IMGVR_UViG_3300022661_000054	huge_phage_3464	220378	Camargo.et.al.2023	Host-associated;Mammals;Digestive system	Animal digestive system	0.351587	High-quality	High-quality	Yes	/	Yes	Viruses;Duplodnaviria;Heunggongvirae;Uroviricota;Caudoviricetes
IMGVR_UViG_3300013307_000015	huge_phage_3466	245051	Camargo.et.al.2023	Host-associated;Plants;Roots	Plants-related	0.542826	Complete	High-quality	Yes	/	Yes	Viruses;Duplodnaviria;Heunggongvirae;Uroviricota;Caudoviricetes
IMGVR_UViG_3300025073_000989	huge_phage_3470	275832	Camargo.et.al.2023	Environmental;Terrestrial;Deep subsurface	Deep subsurface	0.342828	High-quality	High-quality	Yes	/	Yes	Viruses;Duplodnaviria;Heunggongvirae;Uroviricota;Caudoviricetes
IMGVR_UViG_3300008643_000076	huge_phage_3472	244563	Camargo.et.al.2023	Host-associated;Human;Digestive system	Animal digestive system	0.265837	High-quality	High-quality	Yes	/	Yes	Viruses;Duplodnaviria;Heunggongvirae;Uroviricota;Caudoviricetes
IMGVR_UViG_3300043119_000732	huge_phage_3473	209417	Camargo.et.al.2023	Environmental;Aquatic;Deep subsurface	Deep subsurface	0.332733	Complete	High-quality	Yes	/	Yes	Viruses;Duplodnaviria;Heunggongvirae;Uroviricota;Caudoviricetes
IMGVR_UViG_3300046779_001841	huge_phage_3474	316221	Camargo.et.al.2023	Environmental;Aquatic;Freshwater	Freshwater	0.310764	Complete	High-quality	Yes	/	Yes	Viruses;Duplodnaviria;Heunggongvirae;Uroviricota;Caudoviricetes
IMGVR_UViG_3300028624_000003	huge_phage_3476	220982	Camargo.et.al.2023	Engineered;Bioreactor;Anaerobic	Bioreactor	0.468835	Complete	High-quality	Yes	/	Yes	Viruses;Duplodnaviria;Heunggongvirae;Uroviricota;Caudoviricetes
IMGVR_UViG_3300037805_000644	huge_phage_3477	222939	Camargo.et.al.2023	Environmental;Aquatic;Marine	Marine	0.609386	Low-quality	Genome-fragment	Yes	/	Yes	Viruses;Duplodnaviria;Heunggongvirae;Uroviricota;Caudoviricetes
IMGVR_UViG_3300008141_000002	huge_phage_3478	227204	Camargo.et.al.2023	Host-associated;Human;Digestive system	Animal digestive system	0.391234	Complete	High-quality	Yes	/	Yes	Viruses;Duplodnaviria;Heunggongvirae;Uroviricota;Caudoviricetes
IMGVR_UViG_3300032236_001024	huge_phage_3481	202141	Camargo.et.al.2023	Environmental;Aquatic;Freshwater	Freshwater	0.357107	Complete	High-quality	Yes	/	Yes	Viruses;Duplodnaviria;Heunggongvirae;Uroviricota;Caudoviricetes
IMGVR_UViG_3300005739_000025	huge_phage_3484	244006	Camargo.et.al.2023	Environmental;Aquatic;Freshwater	Freshwater	0.327676	High-quality	High-quality	Yes	/	Yes	Viruses;Duplodnaviria;Heunggongvirae;Uroviricota;Caudoviricetes
IMGVR_UViG_3300035208_002098	huge_phage_3487	248412	Camargo.et.al.2023	Engineered;Solid waste;Landfill	Landfill	0.276798	Medium-quality	Genome-fragment	Yes	/	Yes	Viruses;Duplodnaviria;Heunggongvirae;Uroviricota;Caudoviricetes
IMGVR_UViG_3300034012_003212	huge_phage_3490	260658	Camargo.et.al.2023	Environmental;Aquatic;Freshwater	Freshwater	0.4165	Medium-quality	Genome-fragment	Yes	/	Yes	Viruses;Duplodnaviria;Heunggongvirae;Uroviricota;Caudoviricetes
IMGVR_UViG_3300028374_000002	huge_phage_3491	201264	Camargo.et.al.2023	Environmental;Aquatic;Non-marine Saline and Alkaline	Non-marine Saline and Alkaline	0.287558	Medium-quality	Genome-fragment	Yes	/	Yes	Viruses;Duplodnaviria;Heunggongvirae;Uroviricota;Caudoviricetes
IMGVR_UViG_3300035502_000313	huge_phage_3492	212182	Camargo.et.al.2023	Host-associated;Mammals;Digestive system	Animal digestive system	0.310441	Complete	High-quality	Yes	/	Yes	Viruses;Duplodnaviria;Heunggongvirae;Uroviricota;Caudoviricetes
IMGVR_UViG_3300035696_000002	huge_phage_3496	463087	Camargo.et.al.2023	Environmental;Terrestrial;Soil	Soil	0.552138	High-quality	High-quality	Yes	/	Yes	Viruses;Duplodnaviria;Heunggongvirae;Uroviricota;Caudoviricetes
IMGVR_UViG_3300045988_122802	huge_phage_3497	204480	Camargo.et.al.2023	Host-associated;Mammals: Human;Digestive system	Animal digestive system	0.314642	High-quality	High-quality	Yes	/	Yes	Viruses;Duplodnaviria;Heunggongvirae;Uroviricota;Caudoviricetes
IMGVR_UViG_3300045988_165726	huge_phage_3504	307031	Camargo.et.al.2023	Host-associated;Mammals: Human;Digestive system	Animal digestive system	0.517866	Complete	High-quality	Yes	/	Yes	Viruses;Duplodnaviria;Heunggongvirae;Uroviricota;Caudoviricetes
IMGVR_UViG_3300020474_000001	huge_phage_3505	207655	Camargo.et.al.2023	Environmental;Aquatic;Marine	Marine	0.373129	High-quality	High-quality	Yes	/	Yes	Viruses;Duplodnaviria;Heunggongvirae;Uroviricota;Caudoviricetes
IMGVR_UViG_3300028886_000029	huge_phage_3508	363317	Camargo.et.al.2023	Host-associated;Mammals;Digestive system	Animal digestive system	0.335429	High-quality	High-quality	Yes	/	Yes	Viruses;Duplodnaviria;Heunggongvirae;Uroviricota;Caudoviricetes
IMGVR_UViG_3300045988_141965	huge_phage_3515	228325	Camargo.et.al.2023	Host-associated;Mammals: Human;Digestive system	Animal digestive system	0.256757	Medium-quality	Genome-fragment	Yes	/	Yes	Viruses;Duplodnaviria;Heunggongvirae;Uroviricota;Caudoviricetes
IMGVR_UViG_3300013426_000014	huge_phage_3518	269322	Camargo.et.al.2023	Host-associated;Mammals;Digestive system	Animal digestive system	0.502737	Medium-quality	Genome-fragment	Yes	/	Yes	Viruses;Duplodnaviria;Heunggongvirae;Uroviricota;Caudoviricetes
IMGVR_UViG_3300042147_000020	huge_phage_3522	238799	Camargo.et.al.2023	Host-associated;Plants;Roots	Plants-related	0.512607	Medium-quality	Genome-fragment	Yes	/	Yes	Viruses;Duplodnaviria;Heunggongvirae;Uroviricota;Caudoviricetes
IMGVR_UViG_3300027708_000012	huge_phage_3523	345369	Camargo.et.al.2023	Environmental;Aquatic;Freshwater	Freshwater	0.380306	High-quality	High-quality	Yes	/	Yes	Viruses;Duplodnaviria;Heunggongvirae;Uroviricota;Caudoviricetes
IMGVR_UViG_3300035698_012408	huge_phage_3527	215417	Camargo.et.al.2023	Environmental;Aquatic;Non-marine Saline and Alkaline	Non-marine Saline and Alkaline	0.566808	Complete	High-quality	Yes	/	Yes	Viruses;Duplodnaviria;Heunggongvirae;Uroviricota;Caudoviricetes
IMGVR_UViG_3300046786_000304	huge_phage_3528	233464	Camargo.et.al.2023	Environmental;Aquatic;Freshwater	Freshwater	0.374409	Medium-quality	Genome-fragment	Yes	/	Yes	Viruses;Duplodnaviria;Heunggongvirae;Uroviricota;Caudoviricetes
IMGVR_UViG_3300047510_003291	huge_phage_3533	339769	Camargo.et.al.2023	Environmental;Aquatic;Freshwater	Freshwater	0.469157	High-quality	High-quality	Yes	/	Yes	Viruses;Duplodnaviria;Heunggongvirae;Uroviricota;Caudoviricetes
IMGVR_UViG_3300030503_000315	huge_phage_3537	215315	Camargo.et.al.2023	Environmental;Terrestrial;Soil	Soil	0.47209	Medium-quality	Genome-fragment	Yes	/	Yes	Viruses;Duplodnaviria;Heunggongvirae;Uroviricota;Caudoviricetes
IMGVR_UViG_3300027759_000044	huge_phage_3539	348724	Camargo.et.al.2023	Environmental;Aquatic;Freshwater	Freshwater	0.358378	High-quality	High-quality	Yes	/	Yes	Viruses;Duplodnaviria;Heunggongvirae;Uroviricota;Caudoviricetes
IMGVR_UViG_3300049846_000628	huge_phage_3542	211201	Camargo.et.al.2023	Environmental;Aquatic;Freshwater	Freshwater	0.376627	High-quality	High-quality	Yes	/	Yes	Viruses;Duplodnaviria;Heunggongvirae;Uroviricota;Caudoviricetes
IMGVR_UViG_3300008747_000001	huge_phage_3546	254026	Camargo.et.al.2023	Host-associated;Human;Digestive system	Animal digestive system	0.296832	Complete	High-quality	Yes	/	Yes	Viruses;Duplodnaviria;Heunggongvirae;Uroviricota;Caudoviricetes
IMGVR_UViG_3300005617_000001	huge_phage_3548	224954	Camargo.et.al.2023	Host-associated;Plants;Roots	Plants-related	0.535478	Complete	High-quality	Yes	/	Yes	Viruses;Duplodnaviria;Heunggongvirae;Uroviricota;Caudoviricetes
IMGVR_UViG_3300027733_000028	huge_phage_3549	207040	Camargo.et.al.2023	Environmental;Aquatic;Freshwater	Freshwater	0.335143	Low-quality	Genome-fragment	Yes	/	Yes	Viruses;Duplodnaviria;Heunggongvirae;Uroviricota;Caudoviricetes
IMGVR_UViG_3300025401_000012	huge_phage_3564	203760	Camargo.et.al.2023	Environmental;Aquatic;Freshwater	Freshwater	0.363482	Medium-quality	Genome-fragment	Yes	/	Yes	Viruses;Duplodnaviria;Heunggongvirae;Uroviricota;Caudoviricetes
IMGVR_UViG_3300049460_000128	huge_phage_3569	296594	Camargo.et.al.2023	Host-associated;Plants;Roots	Plants-related	0.463431	Medium-quality	Genome-fragment	Yes	/	Yes	Viruses;Duplodnaviria;Heunggongvirae;Uroviricota;Caudoviricetes
IMGVR_UViG_3300045988_163396	huge_phage_3571	216865	Camargo.et.al.2023	Host-associated;Mammals: Human;Digestive system	Animal digestive system	0.301104	High-quality	High-quality	Yes	/	Yes	Viruses;Duplodnaviria;Heunggongvirae;Uroviricota;Caudoviricetes
IMGVR_UViG_3300023184_000024	huge_phage_3574	352754	Camargo.et.al.2023	Environmental;Aquatic;Freshwater	Freshwater	0.423766	Complete	High-quality	Yes	/	Yes	Viruses;Duplodnaviria;Heunggongvirae;Uroviricota;Caudoviricetes
IMGVR_UViG_3300035183_000733	huge_phage_3575	373759	Camargo.et.al.2023	Environmental;Aquatic;Freshwater	Freshwater	0.500895	High-quality	High-quality	Yes	/	Yes	Viruses;Duplodnaviria;Heunggongvirae;Uroviricota;Caudoviricetes
IMGVR_UViG_3300037725_000018	huge_phage_3576	223357	Camargo.et.al.2023	Environmental;Aquatic;Marine	Marine	0.428176	High-quality	High-quality	Yes	/	Yes	Viruses;Duplodnaviria;Heunggongvirae;Uroviricota;Caudoviricetes
IMGVR_UViG_3300018080_000102	huge_phage_3577	205369	Camargo.et.al.2023	Environmental;Aquatic;Non-marine Saline and Alkaline	Non-marine Saline and Alkaline	0.45094	Complete	High-quality	Yes	/	Yes	Viruses;Duplodnaviria;Heunggongvirae;Uroviricota;Caudoviricetes
IMGVR_UViG_3300032312_001422	huge_phage_3582	288815	Camargo.et.al.2023	Environmental;Aquatic;Freshwater	Freshwater	0.420522	Medium-quality	Genome-fragment	Yes	/	Yes	Viruses;Duplodnaviria;Heunggongvirae;Uroviricota;Caudoviricetes
IMGVR_UViG_3300047539_000055	huge_phage_3583	350648	Camargo.et.al.2023	Environmental;Terrestrial;Soil	Soil	0.377113	Medium-quality	Genome-fragment	Yes	/	Yes	Viruses;Duplodnaviria;Heunggongvirae;Uroviricota;Caudoviricetes
IMGVR_UViG_3300031370_000001	huge_phage_3588	263744	Camargo.et.al.2023	Host-associated;Plants;Phyllosphere	Plants-related	0.49302	High-quality	High-quality	Yes	/	Yes	Viruses;Duplodnaviria;Heunggongvirae;Uroviricota;Caudoviricetes
IMGVR_UViG_3300035181_000357	huge_phage_3589	210611	Camargo.et.al.2023	Environmental;Aquatic;Freshwater	Freshwater	0.414665	High-quality	High-quality	Yes	/	Yes	Viruses;Duplodnaviria;Heunggongvirae;Uroviricota;Caudoviricetes
IMGVR_UViG_3300028591_000083	huge_phage_3590	207349	Camargo.et.al.2023	Host-associated;Mammals;Digestive system	Animal digestive system	0.335584	Medium-quality	Genome-fragment	Yes	/	Yes	Viruses;Duplodnaviria;Heunggongvirae;Uroviricota;Caudoviricetes
IMGVR_UViG_3300031992_000011	huge_phage_3591	208208	Camargo.et.al.2023	Host-associated;Mammals;Digestive system	Animal digestive system	0.486432	Medium-quality	Genome-fragment	Yes	/	Yes	Viruses;Duplodnaviria;Heunggongvirae;Uroviricota;Caudoviricetes
IMGVR_UViG_3300035698_013504	huge_phage_3599	200903	Camargo.et.al.2023	Environmental;Aquatic;Non-marine Saline and Alkaline	Non-marine Saline and Alkaline	0.553501	Complete	High-quality	Yes	/	Yes	Viruses;Duplodnaviria;Heunggongvirae;Uroviricota;Caudoviricetes
IMGVR_UViG_3300037067_013225	huge_phage_3601	202677	Camargo.et.al.2023	Engineered;Solid waste;Landfill	Landfill	0.398723	High-quality	High-quality	Yes	/	Yes	Viruses;Duplodnaviria;Heunggongvirae;Uroviricota;Caudoviricetes
IMGVR_UViG_3300007315_000004	huge_phage_3603	343755	Camargo.et.al.2023	Host-associated;Human;Digestive system	Animal digestive system	0.364219	Complete	High-quality	Yes	/	Yes	Viruses;Duplodnaviria;Heunggongvirae;Uroviricota;Caudoviricetes
IMGVR_UViG_3300046733_000629	huge_phage_3607	267186	Camargo.et.al.2023	Environmental;Aquatic;Marine	Marine	0.345201	Medium-quality	Genome-fragment	Yes	/	Yes	Viruses;Duplodnaviria;Heunggongvirae;Uroviricota;Caudoviricetes
IMGVR_UViG_3300032770_000001	huge_phage_3611	455708	Camargo.et.al.2023	Environmental;Terrestrial;Soil	Soil	0.53719	High-quality	High-quality	Yes	/	Yes	Viruses;Duplodnaviria;Heunggongvirae;Uroviricota;Caudoviricetes
IMGVR_UViG_3300045988_161245	huge_phage_3613	212684	Camargo.et.al.2023	Host-associated;Mammals: Human;Digestive system	Animal digestive system	0.326527	Complete	High-quality	Yes	/	Yes	Viruses;Duplodnaviria;Heunggongvirae;Uroviricota;Caudoviricetes
IMGVR_UViG_3300043468_001158	huge_phage_3618	201135	Camargo.et.al.2023	Environmental;Aquatic;Freshwater	Freshwater	0.372431	Medium-quality	Genome-fragment	Yes	/	Yes	Viruses;Duplodnaviria;Heunggongvirae;Uroviricota;Caudoviricetes
IMGVR_UViG_3300032007_000009	huge_phage_3619	289687	Camargo.et.al.2023	Host-associated;Mammals;Digestive system	Animal digestive system	0.256573	High-quality	High-quality	Yes	/	Yes	Viruses;Duplodnaviria;Heunggongvirae;Uroviricota;Caudoviricetes
IMGVR_UViG_3300031994_000001	huge_phage_3620	413021	Camargo.et.al.2023	Host-associated;Mammals;Digestive system	Animal digestive system	0.430588	High-quality	High-quality	Yes	/	Yes	Viruses;Duplodnaviria;Heunggongvirae;Uroviricota;Caudoviricetes
IMGVR_UViG_3300009709_000002	huge_phage_3622	360227	Camargo.et.al.2023	Host-associated;Plants;Peat moss	Plants-related	0.468913	Complete	High-quality	Yes	/	Yes	Viruses;Duplodnaviria;Heunggongvirae;Uroviricota;Caudoviricetes
IMGVR_UViG_3300025030_000041	huge_phage_3625	246115	Camargo.et.al.2023	Environmental;Aquatic;Deep subsurface	Deep subsurface	0.260866	Medium-quality	Genome-fragment	Yes	/	Yes	Viruses;Duplodnaviria;Heunggongvirae;Uroviricota;Caudoviricetes
IMGVR_UViG_3300046167_000724	huge_phage_3628	231566	Camargo.et.al.2023	Environmental;Aquatic;Marine	Marine	0.354227	Medium-quality	Genome-fragment	Yes	/	Yes	Viruses;Duplodnaviria;Heunggongvirae;Uroviricota;Caudoviricetes
IMGVR_UViG_3300022744_000020	huge_phage_3631	270383	Camargo.et.al.2023	Environmental;Aquatic;Freshwater	Freshwater	0.510513	High-quality	High-quality	Yes	/	Yes	Viruses;Duplodnaviria;Heunggongvirae;Uroviricota;Caudoviricetes
IMGVR_UViG_3300007214_000006	huge_phage_3632	222380	Camargo.et.al.2023	Environmental;Aquatic;Freshwater	Freshwater	0.31984	High-quality	High-quality	Yes	/	Yes	Viruses;Duplodnaviria;Heunggongvirae;Uroviricota;Caudoviricetes
IMGVR_UViG_3300046170_000302	huge_phage_3635	205010	Camargo.et.al.2023	Environmental;Aquatic;Marine	Marine	0.395537	High-quality	High-quality	Yes	/	Yes	Viruses;Duplodnaviria;Heunggongvirae;Uroviricota;Caudoviricetes
IMGVR_UViG_3300017917_003143	huge_phage_3636	343632	Camargo.et.al.2023	Environmental;Aquatic;Freshwater	Freshwater	0.452138	Medium-quality	Genome-fragment	Yes	/	Yes	Viruses;Duplodnaviria;Heunggongvirae;Uroviricota;Caudoviricetes
IMGVR_UViG_3300008408_000055	huge_phage_3637	214368	Camargo.et.al.2023	Host-associated;Human;Digestive system	Animal digestive system	0.480422	High-quality	High-quality	Yes	/	Yes	Viruses;Duplodnaviria;Heunggongvirae;Uroviricota;Caudoviricetes
IMGVR_UViG_3300017565_000017	huge_phage_3640	242859	Camargo.et.al.2023	Environmental;Terrestrial;Soil	Soil	0.531012	High-quality	High-quality	Yes	/	Yes	Viruses;Duplodnaviria;Heunggongvirae;Uroviricota;Caudoviricetes
IMGVR_UViG_3300008108_000013	huge_phage_3642	215349	Camargo.et.al.2023	Environmental;Aquatic;Freshwater	Freshwater	0.385574	Medium-quality	Genome-fragment	Yes	/	Yes	Viruses;Duplodnaviria;Heunggongvirae;Uroviricota;Caudoviricetes
IMGVR_UViG_3300020420_000671	huge_phage_3645	337486	Camargo.et.al.2023	Environmental;Aquatic;Marine	Marine	0.362528	High-quality	High-quality	Yes	/	Yes	Viruses;Duplodnaviria;Heunggongvirae;Uroviricota;Caudoviricetes
IMGVR_UViG_3300014208_000026	huge_phage_3649	257181	Camargo.et.al.2023	Environmental;Aquatic;Deep subsurface	Deep subsurface	0.547879	Medium-quality	Genome-fragment	Yes	/	Yes	Viruses;Duplodnaviria;Heunggongvirae;Uroviricota;Caudoviricetes
IMGVR_UViG_3300042013_000103	huge_phage_3652	308580	Camargo.et.al.2023	Host-associated;Plants;Roots	Plants-related	0.55058	High-quality	High-quality	Yes	/	Yes	Viruses;Duplodnaviria;Heunggongvirae;Uroviricota;Caudoviricetes
IMGVR_UViG_3300042445_001485	huge_phage_3653	210425	Camargo.et.al.2023	Environmental;Aquatic;Freshwater	Freshwater	0.423956	Medium-quality	Genome-fragment	Yes	/	Yes	Viruses;Duplodnaviria;Heunggongvirae;Uroviricota;Caudoviricetes
IMGVR_UViG_3300046003_007892	huge_phage_3656	240363	Camargo.et.al.2023	Environmental;Aquatic;Freshwater	Freshwater	0.583842	Medium-quality	Genome-fragment	Yes	/	Yes	Viruses;Duplodnaviria;Heunggongvirae;Uroviricota;Caudoviricetes
IMGVR_UViG_3300042892_002922	huge_phage_3658	286845	Camargo.et.al.2023	Environmental;Aquatic;Freshwater	Freshwater	0.327996	Medium-quality	Genome-fragment	Yes	/	Yes	Viruses;Duplodnaviria;Heunggongvirae;Uroviricota;Caudoviricetes
IMGVR_UViG_3300043450_000376	huge_phage_3663	231953	Camargo.et.al.2023	Environmental;Aquatic;Freshwater	Freshwater	0.364449	Medium-quality	Genome-fragment	Yes	/	Yes	Viruses;Duplodnaviria;Heunggongvirae;Uroviricota;Caudoviricetes
IMGVR_UViG_3300045450_000109	huge_phage_3664	278524	Camargo.et.al.2023	Host-associated;Plants;Phyllosphere	Plants-related	0.512645	Complete	High-quality	Yes	/	Yes	Viruses;Duplodnaviria;Heunggongvirae;Uroviricota;Caudoviricetes
IMGVR_UViG_3300028917_000191	huge_phage_3671	277179	Camargo.et.al.2023	Environmental;Aquatic;Marine	Marine	0.367124	Complete	High-quality	Yes	/	Yes	Viruses;Duplodnaviria;Heunggongvirae;Uroviricota;Caudoviricetes
IMGVR_UViG_3300045004_000088	huge_phage_3673	253983	Camargo.et.al.2023	Environmental;Aquatic;Freshwater	Freshwater	0.555836	High-quality	High-quality	Yes	/	Yes	Viruses;Duplodnaviria;Heunggongvirae;Uroviricota;Caudoviricetes
IMGVR_UViG_3300037041_001930	huge_phage_3682	217040	Camargo.et.al.2023	Environmental;Aquatic;Freshwater	Freshwater	0.575986	High-quality	High-quality	Yes	/	Yes	Viruses;Duplodnaviria;Heunggongvirae;Uroviricota;Caudoviricetes
IMGVR_UViG_3300014202_001521	huge_phage_3685	340934	Camargo.et.al.2023	Engineered;Bioreactor;Continuous culture	Bioreactor	0.428573	High-quality	High-quality	Yes	/	Yes	Viruses;Duplodnaviria;Heunggongvirae;Uroviricota;Caudoviricetes
IMGVR_UViG_3300042430_002057	huge_phage_3686	251957	Camargo.et.al.2023	Environmental;Aquatic;Freshwater	Freshwater	0.305897	Medium-quality	Genome-fragment	Yes	/	Yes	Viruses;Duplodnaviria;Heunggongvirae;Uroviricota;Caudoviricetes
IMGVR_UViG_3300007083_000004	huge_phage_3688	200349	Camargo.et.al.2023	Host-associated;Arthropoda: Insects;Digestive system	Animal digestive system	0.310608	Medium-quality	Genome-fragment	Yes	/	Yes	Viruses;Duplodnaviria;Heunggongvirae;Uroviricota;Caudoviricetes
IMGVR_UViG_3300042894_001948	huge_phage_3691	310273	Camargo.et.al.2023	Environmental;Aquatic;Freshwater	Freshwater	0.355835	Medium-quality	Genome-fragment	Yes	/	Yes	Viruses;Duplodnaviria;Heunggongvirae;Uroviricota;Caudoviricetes
IMGVR_UViG_3300025387_000009	huge_phage_3693	225136	Camargo.et.al.2023	Environmental;Aquatic;Freshwater	Freshwater	0.339679	High-quality	High-quality	Yes	/	Yes	Viruses;Duplodnaviria;Heunggongvirae;Uroviricota;Caudoviricetes
IMGVR_UViG_3300028888_000051	huge_phage_3694	227383	Camargo.et.al.2023	Host-associated;Mammals;Digestive system	Animal digestive system	0.26586	High-quality	High-quality	Yes	/	Yes	Viruses;Duplodnaviria;Heunggongvirae;Uroviricota;Caudoviricetes
IMGVR_UViG_3300032242_002454	huge_phage_3695	204625	Camargo.et.al.2023	Environmental;Aquatic;Freshwater	Freshwater	0.344929	Complete	High-quality	Yes	/	Yes	Viruses;Duplodnaviria;Heunggongvirae;Uroviricota;Caudoviricetes
IMGVR_UViG_3300034072_000926	huge_phage_3699	465259	Camargo.et.al.2023	Environmental;Aquatic;Deep subsurface	Deep subsurface	0.491273	High-quality	High-quality	Yes	/	Yes	Viruses;Duplodnaviria;Heunggongvirae;Uroviricota;Caudoviricetes
IMGVR_UViG_2912838376_000002	huge_phage_3701	244829	Camargo.et.al.2023	Unknown	Unknown	0.364556	High-quality	High-quality	Yes	/	Yes	Viruses;Duplodnaviria;Heunggongvirae;Uroviricota;Caudoviricetes
IMGVR_UViG_3300037054_000148	huge_phage_3706	313597	Camargo.et.al.2023	Environmental;Terrestrial;Soil	Soil	0.494297	High-quality	High-quality	Yes	/	Yes	Viruses;Duplodnaviria;Heunggongvirae;Uroviricota;Caudoviricetes
IMGVR_UViG_3300032007_000008	huge_phage_3711	291652	Camargo.et.al.2023	Host-associated;Mammals;Digestive system	Animal digestive system	0.453565	High-quality	High-quality	Yes	/	Yes	Viruses;Duplodnaviria;Heunggongvirae;Uroviricota;Caudoviricetes
IMGVR_UViG_3300023083_000001	huge_phage_3712	258357	Camargo.et.al.2023	Environmental;Terrestrial;Plant litter	Others	0.507093	Complete	High-quality	Yes	/	Yes	Viruses;Duplodnaviria;Heunggongvirae;Uroviricota;Caudoviricetes
IMGVR_UViG_3300033069_001378	huge_phage_3713	252526	Camargo.et.al.2023	Engineered;WWTP;Activated Sludge	WWTP	0.421315	Medium-quality	Genome-fragment	Yes	/	Yes	Viruses;Duplodnaviria;Heunggongvirae;Uroviricota;Caudoviricetes
IMGVR_UViG_3300023296_001674	huge_phage_3715	538297	Camargo.et.al.2023	Environmental;Aquatic;Non-marine Saline and Alkaline	Non-marine Saline and Alkaline	0.357674	High-quality	High-quality	Yes	/	Yes	Viruses;Duplodnaviria;Heunggongvirae;Uroviricota;Caudoviricetes
IMGVR_UViG_3300024331_000007	huge_phage_3717	359890	Camargo.et.al.2023	Environmental;Terrestrial;Soil	Soil	0.411498	Medium-quality	Genome-fragment	Yes	/	Yes	Viruses;Duplodnaviria;Heunggongvirae;Uroviricota;Caudoviricetes
IMGVR_UViG_3300045988_139370	huge_phage_3726	231437	Camargo.et.al.2023	Host-associated;Mammals: Human;Digestive system	Animal digestive system	0.353936	Complete	High-quality	Yes	/	Yes	Viruses;Duplodnaviria;Heunggongvirae;Uroviricota;Caudoviricetes
IMGVR_UViG_3300029288_000071	huge_phage_3729	207030	Camargo.et.al.2023	Engineered;Solid waste;Landfill	Landfill	0.294078	High-quality	High-quality	Yes	/	Yes	Viruses;Duplodnaviria;Heunggongvirae;Uroviricota;Caudoviricetes
IMGVR_UViG_3300037851_000671	huge_phage_3730	218772	Camargo.et.al.2023	Environmental;Aquatic;Thermal springs	Others	0.433954	Medium-quality	Genome-fragment	Yes	/	Yes	Viruses;Duplodnaviria;Heunggongvirae;Uroviricota;Caudoviricetes
IMGVR_UViG_3300030419_008158	huge_phage_3731	284429	Camargo.et.al.2023	Environmental;Aquatic;Marine	Marine	0.41736	High-quality	High-quality	Yes	/	Yes	Viruses;Duplodnaviria;Heunggongvirae;Uroviricota;Caudoviricetes
IMGVR_UViG_3300045125_000071	huge_phage_3747	251358	Camargo.et.al.2023	Environmental;Aquatic;Freshwater	Freshwater	0.313481	Medium-quality	Genome-fragment	Yes	/	Yes	Viruses;Duplodnaviria;Heunggongvirae;Uroviricota;Caudoviricetes
IMGVR_UViG_3300028887_000067	huge_phage_3748	308245	Camargo.et.al.2023	Host-associated;Mammals;Digestive system	Animal digestive system	0.537232	Medium-quality	Genome-fragment	Yes	/	Yes	Viruses;Duplodnaviria;Heunggongvirae;Uroviricota;Caudoviricetes
IMGVR_UViG_3300009155_000035	huge_phage_3763	242451	Camargo.et.al.2023	Environmental;Aquatic;Freshwater	Freshwater	0.42628	Medium-quality	Genome-fragment	Yes	/	Yes	Viruses;Duplodnaviria;Heunggongvirae;Uroviricota;Caudoviricetes
IMGVR_UViG_3300028804_000001	huge_phage_3764	225628	Camargo.et.al.2023	Engineered;WWTP;Aerobic digester	WWTP	0.38797	Medium-quality	Genome-fragment	Yes	/	Yes	Viruses;Duplodnaviria;Heunggongvirae;Uroviricota;Caudoviricetes
IMGVR_UViG_3300045993_000138	huge_phage_3766	214176	Camargo.et.al.2023	Environmental;Aquatic;Freshwater	Freshwater	0.410457	Complete	High-quality	Yes	/	Yes	Viruses;Duplodnaviria;Heunggongvirae;Uroviricota;Caudoviricetes
IMGVR_UViG_3300029305_005547	huge_phage_3768	278849	Camargo.et.al.2023	Host-associated;Mammals;Digestive system	Animal digestive system	0.320704	High-quality	High-quality	Yes	/	Yes	Viruses;Duplodnaviria;Heunggongvirae;Uroviricota;Caudoviricetes
IMGVR_UViG_3300009183_000045	huge_phage_3772	214677	Camargo.et.al.2023	Environmental;Aquatic;Freshwater	Freshwater	0.360998	High-quality	High-quality	Yes	/	Yes	Viruses;Duplodnaviria;Heunggongvirae;Uroviricota;Caudoviricetes
IMGVR_UViG_3300006743_000001	huge_phage_3773	258310	Camargo.et.al.2023	Host-associated;Human;Digestive system	Animal digestive system	0.369208	High-quality	High-quality	Yes	/	Yes	Viruses;Duplodnaviria;Heunggongvirae;Uroviricota;Caudoviricetes
IMGVR_UViG_3300008524_000006	huge_phage_3784	229085	Camargo.et.al.2023	Host-associated;Human;Digestive system	Animal digestive system	0.390977	Medium-quality	Genome-fragment	Yes	/	Yes	Viruses;Duplodnaviria;Heunggongvirae;Uroviricota;Caudoviricetes
IMGVR_UViG_3300045988_153522	huge_phage_3786	272222	Camargo.et.al.2023	Host-associated;Mammals: Human;Digestive system	Animal digestive system	0.275518	High-quality	High-quality	Yes	/	Yes	Viruses;Duplodnaviria;Heunggongvirae;Uroviricota;Caudoviricetes
IMGVR_UViG_3300007996_000009	huge_phage_3789	236501	Camargo.et.al.2023	Host-associated;Human;Digestive system	Animal digestive system	0.312878	High-quality	High-quality	Yes	/	Yes	Viruses;Duplodnaviria;Heunggongvirae;Uroviricota;Caudoviricetes
IMGVR_UViG_3300006291_000002	huge_phage_3794	232299	Camargo.et.al.2023	Host-associated;Human;Digestive system	Animal digestive system	0.393157	Complete	High-quality	Yes	/	Yes	Viruses;Duplodnaviria;Heunggongvirae;Uroviricota;Caudoviricetes
IMGVR_UViG_3300046665_000548	huge_phage_3795	607744	Camargo.et.al.2023	Host-associated;Plants;Roots	Plants-related	0.517017	High-quality	High-quality	Yes	/	Yes	Viruses;Duplodnaviria;Heunggongvirae;Uroviricota;Caudoviricetes
IMGVR_UViG_3300048438_000153	huge_phage_3798	275102	Camargo.et.al.2023	Environmental;Aquatic;Marine	Marine	0.474802	High-quality	High-quality	Yes	/	Yes	Viruses;Duplodnaviria;Heunggongvirae;Uroviricota;Caudoviricetes
IMGVR_UViG_3300032242_000723	huge_phage_3799	333115	Camargo.et.al.2023	Environmental;Aquatic;Freshwater	Freshwater	0.410366	Medium-quality	Genome-fragment	Yes	/	Yes	Viruses;Duplodnaviria;Heunggongvirae;Uroviricota;Caudoviricetes
IMGVR_UViG_3300042514_000542	huge_phage_3802	206590	Camargo.et.al.2023	Environmental;Aquatic;Freshwater	Freshwater	0.349886	Medium-quality	Genome-fragment	Yes	/	Yes	Viruses;Duplodnaviria;Heunggongvirae;Uroviricota;Caudoviricetes
IMGVR_UViG_3300020048_000009	huge_phage_3805	211678	Camargo.et.al.2023	Environmental;Aquatic;Freshwater	Freshwater	0.297679	Medium-quality	Genome-fragment	Yes	/	Yes	Viruses;Duplodnaviria;Heunggongvirae;Uroviricota;Caudoviricetes
IMGVR_UViG_3300008152_000003	huge_phage_3806	248576	Camargo.et.al.2023	Host-associated;Human;Digestive system	Animal digestive system	0.345331	High-quality	High-quality	Yes	/	Yes	Viruses;Duplodnaviria;Heunggongvirae;Uroviricota;Caudoviricetes
IMGVR_UViG_3300037067_027615	huge_phage_3811	635154	Camargo.et.al.2023	Engineered;Solid waste;Landfill	Landfill	0.256629	High-quality	High-quality	Yes	/	Yes	Viruses;Duplodnaviria;Heunggongvirae;Uroviricota;Caudoviricetes
IMGVR_UViG_3300001528_000580	huge_phage_3812	440868	Camargo.et.al.2023	Host-associated;Mammals;Digestive system	Animal digestive system	0.251311	Complete	High-quality	Yes	/	Yes	Viruses;Duplodnaviria;Heunggongvirae;Uroviricota;Caudoviricetes
IMGVR_UViG_3300028045_000001	huge_phage_3814	239960	Camargo.et.al.2023	Environmental;Aquatic;Marine	Marine	0.391078	Complete	High-quality	Yes	/	Yes	Viruses;Duplodnaviria;Heunggongvirae;Uroviricota;Caudoviricetes
IMGVR_UViG_3300032322_001765	huge_phage_3818	220867	Camargo.et.al.2023	Environmental;Aquatic;Freshwater	Freshwater	0.351854	Medium-quality	Genome-fragment	Yes	/	Yes	Viruses;Duplodnaviria;Heunggongvirae;Uroviricota;Caudoviricetes
IMGVR_UViG_3300020177_000966	huge_phage_3820	224261	Camargo.et.al.2023	Environmental;Aquatic;Marine	Marine	0.360772	Medium-quality	Genome-fragment	Yes	/	Yes	Viruses;Duplodnaviria;Heunggongvirae;Uroviricota;Caudoviricetes
IMGVR_UViG_3300035701_000002	huge_phage_3834	203397	Camargo.et.al.2023	Environmental;Aquatic;Freshwater	Freshwater	0.643259	Low-quality	Genome-fragment	Yes	/	Yes	Viruses;Duplodnaviria;Heunggongvirae;Uroviricota;Caudoviricetes
IMGVR_UViG_3300045988_180056	huge_phage_3836	362675	Camargo.et.al.2023	Host-associated;Mammals: Human;Digestive system	Animal digestive system	0.312743	High-quality	High-quality	Yes	/	Yes	Viruses;Duplodnaviria;Heunggongvirae;Uroviricota;Caudoviricetes
IMGVR_UViG_3300031953_000001	huge_phage_3839	228887	Camargo.et.al.2023	Environmental;Aquatic;Marine	Marine	0.523638	Medium-quality	Genome-fragment	Yes	/	Yes	Viruses;Duplodnaviria;Heunggongvirae;Uroviricota;Caudoviricetes
IMGVR_UViG_3300013121_000030	huge_phage_3841	234244	Camargo.et.al.2023	Engineered;WWTP;Activated Sludge	WWTP	0.554862	Medium-quality	Genome-fragment	Yes	/	Yes	Viruses;Duplodnaviria;Heunggongvirae;Uroviricota;Caudoviricetes
IMGVR_UViG_3300028886_000001	huge_phage_3843	213202	Camargo.et.al.2023	Host-associated;Mammals;Digestive system	Animal digestive system	0.279889	Complete	High-quality	Yes	/	Yes	Viruses;Duplodnaviria;Heunggongvirae;Uroviricota;Caudoviricetes
IMGVR_UViG_3300009431_000002	huge_phage_3844	201921	Camargo.et.al.2023	Environmental;Aquatic;Marine	Marine	0.672624	High-quality	High-quality	Yes	/	Yes	Viruses;Duplodnaviria;Heunggongvirae;Uroviricota;Caudoviricetes
IMGVR_UViG_3300021167_000382	huge_phage_3846	210129	Camargo.et.al.2023	Environmental;Aquatic;Freshwater	Freshwater	0.456215	Medium-quality	Genome-fragment	Yes	/	Yes	Viruses;Duplodnaviria;Heunggongvirae;Uroviricota;Caudoviricetes
IMGVR_UViG_3300021399_000102	huge_phage_3849	201557	Camargo.et.al.2023	Host-associated;Mammals;Digestive system	Animal digestive system	0.450423	Low-quality	Genome-fragment	Yes	/	Yes	Viruses;Duplodnaviria;Heunggongvirae;Uroviricota;Caudoviricetes
IMGVR_UViG_3300011980_000003	huge_phage_3852	211612	Camargo.et.al.2023	Host-associated;Mammals: Human;Digestive system	Animal digestive system	0.277985	High-quality	High-quality	Yes	/	Yes	Viruses;Duplodnaviria;Heunggongvirae;Uroviricota;Caudoviricetes
IMGVR_UViG_3300005826_000294	huge_phage_3858	301683	Camargo.et.al.2023	Environmental;Aquatic;Sediment	Others	0.29888	Medium-quality	Genome-fragment	Yes	/	Yes	Viruses;Duplodnaviria;Heunggongvirae;Uroviricota;Caudoviricetes
IMGVR_UViG_3300010357_001332	huge_phage_3861	237933	Camargo.et.al.2023	Engineered;Bioreactor;Anaerobic	Bioreactor	0.299483	High-quality	High-quality	Yes	/	Yes	Viruses;Duplodnaviria;Heunggongvirae;Uroviricota;Caudoviricetes
IMGVR_UViG_3300007997_000004	huge_phage_3864	240176	Camargo.et.al.2023	Host-associated;Human;Digestive system	Animal digestive system	0.369063	High-quality	High-quality	Yes	/	Yes	Viruses;Duplodnaviria;Heunggongvirae;Uroviricota;Caudoviricetes
IMGVR_UViG_3300036770_004168	huge_phage_3866	216566	Camargo.et.al.2023	Environmental;Aquatic;Deep subsurface	Deep subsurface	0.489366	High-quality	High-quality	Yes	/	Yes	Viruses;Duplodnaviria;Heunggongvirae;Uroviricota;Caudoviricetes
IMGVR_UViG_3300029258_002750	huge_phage_3867	275101	Camargo.et.al.2023	Environmental;Aquatic;Marine	Marine	0.650179	Complete	High-quality	Yes	/	Yes	Viruses;Duplodnaviria;Heunggongvirae;Uroviricota;Caudoviricetes
IMGVR_UViG_3300024255_001563	huge_phage_3869	200843	Camargo.et.al.2023	Environmental;Aquatic;Marine	Marine	0.356896	Medium-quality	Genome-fragment	Yes	/	Yes	Viruses;Duplodnaviria;Heunggongvirae;Uroviricota;Caudoviricetes
IMGVR_UViG_3300038463_000730	huge_phage_3877	434688	Camargo.et.al.2023	Environmental;Terrestrial;Soil	Soil	0.482236	High-quality	High-quality	Yes	/	Yes	Viruses;Duplodnaviria;Heunggongvirae;Uroviricota;Caudoviricetes
IMGVR_UViG_3300029199_000001	huge_phage_3879	231873	Camargo.et.al.2023	Environmental;Terrestrial;Deep subsurface	Deep subsurface	0.530972	Medium-quality	Genome-fragment	Yes	/	Yes	Viruses;Duplodnaviria;Heunggongvirae;Uroviricota;Caudoviricetes
IMGVR_UViG_3300037067_012889	huge_phage_3880	363885	Camargo.et.al.2023	Engineered;Solid waste;Landfill	Landfill	0.430474	High-quality	High-quality	Yes	/	Yes	Viruses;Duplodnaviria;Heunggongvirae;Uroviricota;Caudoviricetes
IMGVR_UViG_3300035390_000014	huge_phage_3881	202719	Camargo.et.al.2023	Environmental;Aquatic;Marine	Marine	0.299661	Medium-quality	Genome-fragment	Yes	/	Yes	Viruses;Duplodnaviria;Heunggongvirae;Uroviricota;Caudoviricetes
IMGVR_UViG_3300024270_000010	huge_phage_3891	206052	Camargo.et.al.2023	Host-associated;Mammals;Digestive system	Animal digestive system	0.39787	High-quality	High-quality	Yes	/	Yes	Viruses;Duplodnaviria;Heunggongvirae;Uroviricota;Caudoviricetes
IMGVR_UViG_2938655777_000006	huge_phage_3897	201847	Camargo.et.al.2023	Host-associated;Plants;Unclassified	Plants-related	0.35947	High-quality	High-quality	Yes	/	Yes	Viruses;Duplodnaviria;Heunggongvirae;Uroviricota;Caudoviricetes
IMGVR_UViG_3300008280_000008	huge_phage_3899	229898	Camargo.et.al.2023	Host-associated;Human;Digestive system	Animal digestive system	0.32467	High-quality	High-quality	Yes	/	Yes	Viruses;Duplodnaviria;Heunggongvirae;Uroviricota;Caudoviricetes
IMGVR_UViG_3300005253_000053	huge_phage_3902	224854	Camargo.et.al.2023	Environmental;Aquatic;Marine	Marine	0.594782	Complete	High-quality	Yes	/	Yes	Viruses;Duplodnaviria;Heunggongvirae;Uroviricota;Caudoviricetes
IMGVR_UViG_3300032123_000052	huge_phage_3903	208085	Camargo.et.al.2023	Environmental;Aquatic;Marine	Marine	0.385597	High-quality	High-quality	Yes	/	Yes	Viruses;Duplodnaviria;Heunggongvirae;Uroviricota;Caudoviricetes
IMGVR_UViG_3300008575_000009	huge_phage_3906	210853	Camargo.et.al.2023	Host-associated;Human;Digestive system	Animal digestive system	0.305208	Medium-quality	Genome-fragment	Yes	/	Yes	Viruses;Duplodnaviria;Heunggongvirae;Uroviricota;Caudoviricetes
IMGVR_UViG_3300011242_000002	huge_phage_3907	273301	Camargo.et.al.2023	Engineered;Built environment;City	Built environment	0.536961	Complete	High-quality	Yes	/	Yes	Viruses;Duplodnaviria;Heunggongvirae;Uroviricota;Caudoviricetes
IMGVR_UViG_3300045988_178845	huge_phage_3910	204736	Camargo.et.al.2023	Host-associated;Mammals: Human;Digestive system	Animal digestive system	0.535109	High-quality	High-quality	Yes	/	Yes	Viruses;Duplodnaviria;Heunggongvirae;Uroviricota;Caudoviricetes
IMGVR_UViG_3300005965_000002	huge_phage_3912	258580	Camargo.et.al.2023	Environmental;Aquatic;Non-marine Saline and Alkaline	Non-marine Saline and Alkaline	0.386499	High-quality	High-quality	Yes	/	Yes	Viruses;Duplodnaviria;Heunggongvirae;Uroviricota;Caudoviricetes
IMGVR_UViG_3300033997_000478	huge_phage_3924	324428	Camargo.et.al.2023	Environmental;Aquatic;Deep subsurface	Deep subsurface	0.581189	Complete	High-quality	Yes	/	Yes	Viruses;Duplodnaviria;Heunggongvirae;Uroviricota;Caudoviricetes
IMGVR_UViG_3300035698_029839	huge_phage_3928	297710	Camargo.et.al.2023	Environmental;Aquatic;Non-marine Saline and Alkaline	Non-marine Saline and Alkaline	0.309015	High-quality	High-quality	Yes	/	Yes	Viruses;Duplodnaviria;Heunggongvirae;Uroviricota;Caudoviricetes
IMGVR_UViG_3300047159_000046	huge_phage_3930	241508	Camargo.et.al.2023	Engineered;WWTP;Aerobic digester	WWTP	0.347922	Medium-quality	Genome-fragment	Yes	/	Yes	Viruses;Duplodnaviria;Heunggongvirae;Uroviricota;Caudoviricetes
IMGVR_UViG_3300028534_000514	huge_phage_3931	281455	Camargo.et.al.2023	Host-associated;Annelida;Integument	Others	0.33313	High-quality	High-quality	Yes	/	Yes	Viruses;Duplodnaviria;Heunggongvirae;Uroviricota;Caudoviricetes
IMGVR_UViG_3300031920_000341	huge_phage_3933	208266	Camargo.et.al.2023	Environmental;Aquatic;Marine	Marine	0.290873	Medium-quality	Genome-fragment	Yes	/	Yes	Viruses;Duplodnaviria;Heunggongvirae;Uroviricota;Caudoviricetes
IMGVR_UViG_3300045988_180432	huge_phage_3934	289366	Camargo.et.al.2023	Host-associated;Mammals: Human;Digestive system	Animal digestive system	0.297267	Medium-quality	Genome-fragment	Yes	/	Yes	Viruses;Duplodnaviria;Heunggongvirae;Uroviricota;Caudoviricetes
IMGVR_UViG_3300035698_018106	huge_phage_3936	322902	Camargo.et.al.2023	Environmental;Aquatic;Non-marine Saline and Alkaline	Non-marine Saline and Alkaline	0.2801	Medium-quality	Genome-fragment	Yes	/	Yes	Viruses;Duplodnaviria;Heunggongvirae;Uroviricota;Caudoviricetes
IMGVR_UViG_3300045988_180274	huge_phage_2214	371686	Camargo.et.al.2023	Host-associated;Mammals: Human;Digestive system	Animal digestive system	0.2996	High-quality	High-quality	Yes	/	Yes	Viruses;Duplodnaviria;Heunggongvirae;Uroviricota;Caudoviricetes
IMGVR_UViG_3300034012_002682	huge_phage_3949	204507	Camargo.et.al.2023	Environmental;Aquatic;Freshwater	Freshwater	0.406368	High-quality	High-quality	Yes	/	Yes	Viruses;Duplodnaviria;Heunggongvirae;Uroviricota;Caudoviricetes
IMGVR_UViG_3300027608_000010	huge_phage_3958	296737	Camargo.et.al.2023	Environmental;Aquatic;Freshwater	Freshwater	0.369226	Medium-quality	Genome-fragment	Yes	/	Yes	Viruses;Duplodnaviria;Heunggongvirae;Uroviricota;Caudoviricetes
IMGVR_UViG_3300027851_000011	huge_phage_3959	200781	Camargo.et.al.2023	Environmental;Aquatic;Deep subsurface	Deep subsurface	0.617957	High-quality	High-quality	Yes	/	Yes	Viruses;Duplodnaviria;Heunggongvirae;Uroviricota;Caudoviricetes
IMGVR_UViG_3300021093_000004	huge_phage_3961	235352	Camargo.et.al.2023	Environmental;Aquatic;Freshwater	Freshwater	0.464984	Medium-quality	Genome-fragment	Yes	/	Yes	Viruses;Duplodnaviria;Heunggongvirae;Uroviricota;Caudoviricetes
IMGVR_UViG_3300026549_000032	huge_phage_3965	218381	Camargo.et.al.2023	Host-associated;Mammals;Digestive system	Animal digestive system	0.403291	Medium-quality	Genome-fragment	Yes	/	Yes	Viruses;Duplodnaviria;Heunggongvirae;Uroviricota;Caudoviricetes
IMGVR_UViG_3300032038_000005	huge_phage_3967	202267	Camargo.et.al.2023	Host-associated;Mammals;Digestive system	Animal digestive system	0.3891	Medium-quality	Genome-fragment	Yes	/	Yes	Viruses;Duplodnaviria;Heunggongvirae;Uroviricota;Caudoviricetes
IMGVR_UViG_3300047159_000064	huge_phage_3968	211949	Camargo.et.al.2023	Engineered;WWTP;Aerobic digester	WWTP	0.516016	Complete	High-quality	Yes	/	Yes	Viruses;Duplodnaviria;Heunggongvirae;Uroviricota;Caudoviricetes
IMGVR_UViG_3300028549_001457	huge_phage_3971	278785	Camargo.et.al.2023	Environmental;Aquatic;Freshwater	Freshwater	0.455491	High-quality	High-quality	Yes	/	Yes	Viruses;Duplodnaviria;Heunggongvirae;Uroviricota;Caudoviricetes
IMGVR_UViG_3300031993_000006	huge_phage_3976	259974	Camargo.et.al.2023	Host-associated;Mammals;Digestive system	Animal digestive system	0.504439	Medium-quality	Genome-fragment	Yes	/	Yes	Viruses;Duplodnaviria;Heunggongvirae;Uroviricota;Caudoviricetes
IMGVR_UViG_3300042562_001598	huge_phage_3977	282192	Camargo.et.al.2023	Environmental;Aquatic;Freshwater	Freshwater	0.301773	High-quality	High-quality	Yes	/	Yes	Viruses;Duplodnaviria;Heunggongvirae;Uroviricota;Caudoviricetes
IMGVR_UViG_3300032331_003609	huge_phage_3979	244850	Camargo.et.al.2023	Environmental;Aquatic;Freshwater	Freshwater	0.344476	Medium-quality	Genome-fragment	Yes	/	Yes	Viruses;Duplodnaviria;Heunggongvirae;Uroviricota;Caudoviricetes
IMGVR_UViG_3300042261_002390	huge_phage_3985	246149	Camargo.et.al.2023	Environmental;Aquatic;Freshwater	Freshwater	0.312396	Medium-quality	Genome-fragment	Yes	/	Yes	Viruses;Duplodnaviria;Heunggongvirae;Uroviricota;Caudoviricetes
IMGVR_UViG_3300028800_000057	huge_phage_3990	443068	Camargo.et.al.2023	Host-associated;Plants;Roots	Plants-related	0.509502	Complete	High-quality	Yes	/	Yes	Viruses;Duplodnaviria;Heunggongvirae;Uroviricota;Caudoviricetes
IMGVR_UViG_3300027708_000016	huge_phage_3991	218343	Camargo.et.al.2023	Environmental;Aquatic;Freshwater	Freshwater	0.327237	High-quality	High-quality	Yes	/	Yes	Viruses;Duplodnaviria;Heunggongvirae;Uroviricota;Caudoviricetes
IMGVR_UViG_3300042294_003246	huge_phage_3994	298910	Camargo.et.al.2023	Environmental;Aquatic;Freshwater	Freshwater	0.319698	High-quality	High-quality	Yes	/	Yes	Viruses;Duplodnaviria;Heunggongvirae;Uroviricota;Caudoviricetes
IMGVR_UViG_3300044625_001067	huge_phage_3997	277244	Camargo.et.al.2023	Environmental;Aquatic;Freshwater	Freshwater	0.497793	High-quality	High-quality	Yes	/	Yes	Viruses;Duplodnaviria;Heunggongvirae;Uroviricota;Caudoviricetes
IMGVR_UViG_3300029908_000004	huge_phage_4001	215291	Camargo.et.al.2023	Environmental;Terrestrial;Soil	Soil	0.412609	High-quality	High-quality	Yes	/	Yes	Viruses;Duplodnaviria;Heunggongvirae;Uroviricota;Caudoviricetes
IMGVR_UViG_3300050190_000017	huge_phage_4002	218861	Camargo.et.al.2023	Environmental;Terrestrial;Soil	Soil	0.482809	Complete	High-quality	Yes	/	Yes	Viruses;Duplodnaviria;Heunggongvirae;Uroviricota;Caudoviricetes
IMGVR_UViG_3300044511_000312	huge_phage_4003	221661	Camargo.et.al.2023	Environmental;Aquatic;Freshwater	Freshwater	0.611691	Complete	High-quality	Yes	/	Yes	Viruses;Duplodnaviria;Heunggongvirae;Uroviricota;Caudoviricetes
IMGVR_UViG_3300032236_001850	huge_phage_4005	434509	Camargo.et.al.2023	Environmental;Aquatic;Freshwater	Freshwater	0.352384	Complete	High-quality	Yes	/	Yes	Viruses;Duplodnaviria;Heunggongvirae;Uroviricota;Caudoviricetes
IMGVR_UViG_3300017963_000188	huge_phage_4006	358038	Camargo.et.al.2023	Environmental;Aquatic;Non-marine Saline and Alkaline	Non-marine Saline and Alkaline	0.405909	High-quality	High-quality	Yes	/	Yes	Viruses;Duplodnaviria;Heunggongvirae;Uroviricota;Caudoviricetes
IMGVR_UViG_3300027732_001704	huge_phage_4007	208083	Camargo.et.al.2023	Environmental;Aquatic;Freshwater	Freshwater	0.319723	Medium-quality	Genome-fragment	Yes	/	Yes	Viruses;Duplodnaviria;Heunggongvirae;Uroviricota;Caudoviricetes
IMGVR_UViG_3300008279_000002	huge_phage_4008	237758	Camargo.et.al.2023	Host-associated;Human;Digestive system	Animal digestive system	0.309247	Complete	High-quality	Yes	/	Yes	Viruses;Duplodnaviria;Heunggongvirae;Uroviricota;Caudoviricetes
IMGVR_UViG_3300047375_000738	huge_phage_4009	280441	Camargo.et.al.2023	Environmental;Aquatic;Marine	Marine	0.37272	Medium-quality	Genome-fragment	Yes	/	Yes	Viruses;Duplodnaviria;Heunggongvirae;Uroviricota;Caudoviricetes
IMGVR_UViG_3300044633_000899	huge_phage_4012	296330	Camargo.et.al.2023	Environmental;Aquatic;Freshwater	Freshwater	0.303159	High-quality	High-quality	Yes	/	Yes	Viruses;Duplodnaviria;Heunggongvirae;Uroviricota;Caudoviricetes
IMGVR_UViG_3300021364_000005	huge_phage_4016	204143	Camargo.et.al.2023	Environmental;Aquatic;Marine	Marine	0.3628	Medium-quality	Genome-fragment	Yes	/	Yes	Viruses;Duplodnaviria;Heunggongvirae;Uroviricota;Caudoviricetes
IMGVR_UViG_3300025121_000014	huge_phage_4018	232944	Camargo.et.al.2023	Environmental;Terrestrial;Deep subsurface	Deep subsurface	0.234726	Medium-quality	Genome-fragment	Yes	/	Yes	Viruses;Duplodnaviria;Heunggongvirae;Uroviricota;Caudoviricetes
IMGVR_UViG_3300028854_000488	huge_phage_4020	308828	Camargo.et.al.2023	Environmental;Terrestrial;Soil	Soil	0.226544	High-quality	High-quality	Yes	/	Yes	Viruses;Duplodnaviria;Heunggongvirae;Uroviricota;Caudoviricetes
IMGVR_UViG_3300036770_003657	huge_phage_4022	399796	Camargo.et.al.2023	Environmental;Aquatic;Deep subsurface	Deep subsurface	0.365664	High-quality	High-quality	Yes	/	Yes	Viruses;Duplodnaviria;Heunggongvirae;Uroviricota;Caudoviricetes
IMGVR_UViG_3300035208_004396	huge_phage_4029	206247	Camargo.et.al.2023	Engineered;Solid waste;Landfill	Landfill	0.303772	Medium-quality	Genome-fragment	Yes	/	Yes	Viruses;Duplodnaviria;Heunggongvirae;Uroviricota;Caudoviricetes
IMGVR_UViG_3300025930_000007	huge_phage_4030	266490	Camargo.et.al.2023	Environmental;Terrestrial;Soil	Soil	0.576697	High-quality	High-quality	Yes	/	Yes	Viruses;Duplodnaviria;Heunggongvirae;Uroviricota;Caudoviricetes
IMGVR_UViG_3300006321_000007	huge_phage_4034	222015	Camargo.et.al.2023	Host-associated;Human;Digestive system	Animal digestive system	0.295579	High-quality	High-quality	Yes	/	Yes	Viruses;Duplodnaviria;Heunggongvirae;Uroviricota;Caudoviricetes
IMGVR_UViG_3300050156_000143	huge_phage_4040	277516	Camargo.et.al.2023	Environmental;Terrestrial;Plant litter	Others	0.449073	Medium-quality	Genome-fragment	Yes	/	Yes	Viruses;Duplodnaviria;Heunggongvirae;Uroviricota;Caudoviricetes
IMGVR_UViG_3300028581_000010	huge_phage_4046	215268	Camargo.et.al.2023	Environmental;Aquatic;Freshwater	Freshwater	0.499368	High-quality	High-quality	Yes	/	Yes	Viruses;Duplodnaviria;Heunggongvirae;Uroviricota;Caudoviricetes
IMGVR_UViG_3300043426_000266	huge_phage_4052	205063	Camargo.et.al.2023	Environmental;Aquatic;Freshwater	Freshwater	0.380785	Medium-quality	Genome-fragment	Yes	/	Yes	Viruses;Duplodnaviria;Heunggongvirae;Uroviricota;Caudoviricetes
IMGVR_UViG_3300027816_000050	huge_phage_4057	318004	Camargo.et.al.2023	Environmental;Aquatic;Freshwater	Freshwater	0.302789	High-quality	High-quality	Yes	/	Yes	Viruses;Duplodnaviria;Heunggongvirae;Uroviricota;Caudoviricetes
IMGVR_UViG_3300028840_006298	huge_phage_4062	245297	Camargo.et.al.2023	Environmental;Aquatic;Marine	Marine	0.632865	Complete	High-quality	Yes	/	Yes	Viruses;Duplodnaviria;Heunggongvirae;Uroviricota;Caudoviricetes
IMGVR_UViG_3300008107_006173	huge_phage_4063	280067	Camargo.et.al.2023	Environmental;Aquatic;Freshwater	Freshwater	0.396791	Medium-quality	Genome-fragment	Yes	/	Yes	Viruses;Duplodnaviria;Heunggongvirae;Uroviricota;Caudoviricetes
IMGVR_UViG_3300007204_000003	huge_phage_4065	238738	Camargo.et.al.2023	Host-associated;Human;Digestive system	Animal digestive system	0.367574	High-quality	High-quality	Yes	/	Yes	Viruses;Duplodnaviria;Heunggongvirae;Uroviricota;Caudoviricetes
IMGVR_UViG_3300028920_000001	huge_phage_4067	426960	Camargo.et.al.2023	Environmental;Aquatic;Marine	Marine	0.400082	Complete	High-quality	Yes	/	Yes	Viruses;Duplodnaviria;Heunggongvirae;Uroviricota;Caudoviricetes
IMGVR_UViG_3300033555_000001	huge_phage_4068	310728	Camargo.et.al.2023	Environmental;Aquatic;Freshwater	Freshwater	0.454636	Medium-quality	Genome-fragment	Yes	/	Yes	Viruses;Duplodnaviria;Heunggongvirae;Uroviricota;Caudoviricetes
IMGVR_UViG_3300029517_000001	huge_phage_4069	211389	Camargo.et.al.2023	Host-associated;Human;Digestive system	Animal digestive system	0.332804	High-quality	High-quality	Yes	/	Yes	Viruses;Duplodnaviria;Heunggongvirae;Uroviricota;Caudoviricetes
IMGVR_UViG_3300025536_000010	huge_phage_4074	234886	Camargo.et.al.2023	Environmental;Terrestrial;Deep subsurface	Deep subsurface	0.623613	High-quality	High-quality	Yes	/	Yes	Viruses;Duplodnaviria;Heunggongvirae;Uroviricota;Caudoviricetes
IMGVR_UViG_3300029305_004466	huge_phage_4076	210316	Camargo.et.al.2023	Host-associated;Mammals;Digestive system	Animal digestive system	0.335914	High-quality	High-quality	Yes	/	Yes	Viruses;Duplodnaviria;Heunggongvirae;Uroviricota;Caudoviricetes
IMGVR_UViG_3300009161_000021	huge_phage_4081	206319	Camargo.et.al.2023	Environmental;Aquatic;Freshwater	Freshwater	0.513675	Medium-quality	Genome-fragment	Yes	/	Yes	Viruses;Duplodnaviria;Heunggongvirae;Uroviricota;Caudoviricetes
IMGVR_UViG_3300043427_000729	huge_phage_4088	373603	Camargo.et.al.2023	Environmental;Aquatic;Freshwater	Freshwater	0.390366	High-quality	High-quality	Yes	/	Yes	Viruses;Duplodnaviria;Heunggongvirae;Uroviricota;Caudoviricetes
IMGVR_UViG_3300014204_000112	huge_phage_4089	213922	Camargo.et.al.2023	Engineered;Solid waste;Landfill	Landfill	0.424089	Low-quality	Genome-fragment	Yes	/	Yes	Viruses;Duplodnaviria;Heunggongvirae;Uroviricota;Caudoviricetes
IMGVR_UViG_3300042868_003731	huge_phage_4091	217966	Camargo.et.al.2023	Environmental;Aquatic;Freshwater	Freshwater	0.418652	High-quality	High-quality	Yes	/	Yes	Viruses;Duplodnaviria;Heunggongvirae;Uroviricota;Caudoviricetes
IMGVR_UViG_3300044957_000763	huge_phage_4095	478840	Camargo.et.al.2023	Environmental;Aquatic;Freshwater	Freshwater	0.445332	Complete	High-quality	Yes	/	Yes	Viruses;Duplodnaviria;Heunggongvirae;Uroviricota;Caudoviricetes
IMGVR_UViG_3300005289_000052	huge_phage_4103	243669	Camargo.et.al.2023	Host-associated;Plants;Roots	Plants-related	0.520152	Complete	High-quality	Yes	/	Yes	Viruses;Duplodnaviria;Heunggongvirae;Uroviricota;Caudoviricetes
IMGVR_UViG_3300034072_000758	huge_phage_4105	516805	Camargo.et.al.2023	Environmental;Aquatic;Deep subsurface	Deep subsurface	0.451414	Complete	High-quality	Yes	/	Yes	Viruses;Duplodnaviria;Heunggongvirae;Uroviricota;Caudoviricetes
IMGVR_UViG_3300008480_000001	huge_phage_4107	263709	Camargo.et.al.2023	Host-associated;Human;Digestive system	Animal digestive system	0.400517	Complete	High-quality	Yes	/	Yes	Viruses;Duplodnaviria;Heunggongvirae;Uroviricota;Caudoviricetes
IMGVR_UViG_3300043410_000889	huge_phage_4109	231390	Camargo.et.al.2023	Environmental;Aquatic;Freshwater	Freshwater	0.414417	Medium-quality	Genome-fragment	Yes	/	Yes	Viruses;Duplodnaviria;Heunggongvirae;Uroviricota;Caudoviricetes
IMGVR_UViG_3300008660_000003	huge_phage_4110	239650	Camargo.et.al.2023	Host-associated;Human;Digestive system	Animal digestive system	0.335338	High-quality	High-quality	Yes	/	Yes	Viruses;Duplodnaviria;Heunggongvirae;Uroviricota;Caudoviricetes
IMGVR_UViG_3300044675_007481	huge_phage_4112	221709	Camargo.et.al.2023	Environmental;Aquatic;Freshwater	Freshwater	0.373133	Complete	High-quality	Yes	/	Yes	Viruses;Duplodnaviria;Heunggongvirae;Uroviricota;Caudoviricetes
IMGVR_UViG_3300027566_000003	huge_phage_4115	236919	Camargo.et.al.2023	Environmental;Aquatic;Deep subsurface	Deep subsurface	0.288208	High-quality	High-quality	Yes	/	Yes	Viruses;Duplodnaviria;Heunggongvirae;Uroviricota;Caudoviricetes
IMGVR_UViG_3300027759_003166	huge_phage_4121	213787	Camargo.et.al.2023	Environmental;Aquatic;Freshwater	Freshwater	0.370654	Medium-quality	Genome-fragment	Yes	/	Yes	Viruses;Duplodnaviria;Heunggongvirae;Uroviricota;Caudoviricetes
IMGVR_UViG_3300045988_171916	huge_phage_4123	224252	Camargo.et.al.2023	Host-associated;Mammals: Human;Digestive system	Animal digestive system	0.249657	Complete	High-quality	Yes	/	Yes	Viruses;Duplodnaviria;Heunggongvirae;Uroviricota;Caudoviricetes
IMGVR_UViG_3300032038_000001	huge_phage_4126	250395	Camargo.et.al.2023	Host-associated;Mammals;Digestive system	Animal digestive system	0.309267	High-quality	High-quality	Yes	/	Yes	Viruses;Duplodnaviria;Heunggongvirae;Uroviricota;Caudoviricetes
IMGVR_UViG_3300029955_000001	huge_phage_4132	287693	Camargo.et.al.2023	Environmental;Terrestrial;Soil	Soil	0.379168	High-quality	High-quality	Yes	/	Yes	Viruses;Duplodnaviria;Heunggongvirae;Uroviricota;Caudoviricetes
IMGVR_UViG_3300045988_180518	huge_phage_2156	370293	Camargo.et.al.2023	Host-associated;Mammals: Human;Digestive system	Animal digestive system	0.300697	High-quality	High-quality	Yes	/	Yes	Viruses;Duplodnaviria;Heunggongvirae;Uroviricota;Caudoviricetes
IMGVR_UViG_3300028800_000001	huge_phage_4135	327295	Camargo.et.al.2023	Host-associated;Plants;Roots	Plants-related	0.465559	Complete	High-quality	Yes	/	Yes	Viruses;Duplodnaviria;Heunggongvirae;Uroviricota;Caudoviricetes
IMGVR_UViG_3300000976_000009	huge_phage_4137	353143	Camargo.et.al.2023	Host-associated;Algae;Green algae	Others	0.316705	Complete	High-quality	Yes	/	Yes	Viruses;Duplodnaviria;Heunggongvirae;Uroviricota;Caudoviricetes
IMGVR_UViG_3300008436_000007	huge_phage_4142	233724	Camargo.et.al.2023	Host-associated;Human;Digestive system	Animal digestive system	0.325824	Complete	High-quality	Yes	/	Yes	Viruses;Duplodnaviria;Heunggongvirae;Uroviricota;Caudoviricetes
IMGVR_UViG_3300021431_000003	huge_phage_4143	223528	Camargo.et.al.2023	Host-associated;Mammals;Digestive system	Animal digestive system	0.331484	Complete	High-quality	Yes	/	Yes	Viruses;Duplodnaviria;Heunggongvirae;Uroviricota;Caudoviricetes
IMGVR_UViG_3300033463_000005	huge_phage_4145	258509	Camargo.et.al.2023	Host-associated;Mammals;Digestive system	Animal digestive system	0.38758	High-quality	High-quality	Yes	/	Yes	Viruses;Duplodnaviria;Heunggongvirae;Uroviricota;Caudoviricetes
IMGVR_UViG_3300034107_000364	huge_phage_4146	239540	Camargo.et.al.2023	Environmental;Aquatic;Freshwater	Freshwater	0.326346	Medium-quality	Genome-fragment	Yes	/	Yes	Viruses;Duplodnaviria;Heunggongvirae;Uroviricota;Caudoviricetes
IMGVR_UViG_3300027365_000007	huge_phage_4147	222591	Camargo.et.al.2023	Environmental;Aquatic;Deep subsurface	Deep subsurface	0.359534	Medium-quality	Genome-fragment	Yes	/	Yes	Viruses;Duplodnaviria;Heunggongvirae;Uroviricota;Caudoviricetes
IMGVR_UViG_3300031669_000001	huge_phage_4148	345069	Camargo.et.al.2023	Environmental;Terrestrial;Soil	Soil	0.428372	Complete	High-quality	Yes	/	Yes	Viruses;Duplodnaviria;Heunggongvirae;Uroviricota;Caudoviricetes
IMGVR_UViG_3300042892_001069	huge_phage_4149	275918	Camargo.et.al.2023	Environmental;Aquatic;Freshwater	Freshwater	0.39332	Medium-quality	Genome-fragment	Yes	/	Yes	Viruses;Duplodnaviria;Heunggongvirae;Uroviricota;Caudoviricetes
IMGVR_UViG_3300042691_031247	huge_phage_4150	204487	Camargo.et.al.2023	Environmental;Aquatic;Freshwater	Freshwater	0.555082	Complete	High-quality	Yes	/	Yes	Viruses;Duplodnaviria;Heunggongvirae;Uroviricota;Caudoviricetes
IMGVR_UViG_3300011678_000001	huge_phage_4153	269790	Camargo.et.al.2023	Engineered;Built environment;City	Built environment	0.541021	High-quality	High-quality	Yes	/	Yes	Viruses;Duplodnaviria;Heunggongvirae;Uroviricota;Caudoviricetes
IMGVR_UViG_3300037067_026010	huge_phage_4154	210569	Camargo.et.al.2023	Engineered;Solid waste;Landfill	Landfill	0.572449	High-quality	High-quality	Yes	/	Yes	Viruses;Duplodnaviria;Heunggongvirae;Uroviricota;Caudoviricetes
IMGVR_UViG_3300033994_000981	huge_phage_4155	243241	Camargo.et.al.2023	Environmental;Aquatic;Freshwater	Freshwater	0.303156	Complete	High-quality	Yes	/	Yes	Viruses;Duplodnaviria;Heunggongvirae;Uroviricota;Caudoviricetes
IMGVR_UViG_3300007100_000001	huge_phage_4156	267306	Camargo.et.al.2023	Host-associated;Human;Digestive system	Animal digestive system	0.399707	Complete	High-quality	Yes	/	Yes	Viruses;Duplodnaviria;Heunggongvirae;Uroviricota;Caudoviricetes
IMGVR_UViG_3300042940_001591	huge_phage_4160	206155	Camargo.et.al.2023	Environmental;Aquatic;Freshwater	Freshwater	0.322476	Medium-quality	Genome-fragment	Yes	/	Yes	Viruses;Duplodnaviria;Heunggongvirae;Uroviricota;Caudoviricetes
IMGVR_UViG_3300036781_000418	huge_phage_4161	342591	Camargo.et.al.2023	Environmental;Terrestrial;Soil	Soil	0.569802	Complete	High-quality	Yes	/	Yes	Viruses;Duplodnaviria;Heunggongvirae;Uroviricota;Caudoviricetes
IMGVR_UViG_3300027333_000001	huge_phage_4163	340535	Camargo.et.al.2023	Environmental;Aquatic;Freshwater	Freshwater	0.316969	High-quality	High-quality	Yes	/	Yes	Viruses;Duplodnaviria;Heunggongvirae;Uroviricota;Caudoviricetes
IMGVR_UViG_3300031722_000003	huge_phage_4164	219177	Camargo.et.al.2023	Environmental;Terrestrial;Soil	Soil	0.258362	Complete	High-quality	Yes	/	Yes	Viruses;Duplodnaviria;Heunggongvirae;Uroviricota;Caudoviricetes
IMGVR_UViG_3300045988_177345	huge_phage_4167	227405	Camargo.et.al.2023	Host-associated;Mammals: Human;Digestive system	Animal digestive system	0.530463	High-quality	High-quality	Yes	/	Yes	Viruses;Duplodnaviria;Heunggongvirae;Uroviricota;Caudoviricetes
IMGVR_UViG_3300037010_001838	huge_phage_4169	211186	Camargo.et.al.2023	Environmental;Aquatic;Freshwater	Freshwater	0.368282	Medium-quality	Genome-fragment	Yes	/	Yes	Viruses;Duplodnaviria;Heunggongvirae;Uroviricota;Caudoviricetes
IMGVR_UViG_3300008267_000012	huge_phage_4187	243803	Camargo.et.al.2023	Environmental;Aquatic;Freshwater	Freshwater	0.281547	Complete	High-quality	Yes	/	Yes	Viruses;Duplodnaviria;Heunggongvirae;Uroviricota;Caudoviricetes
IMGVR_UViG_3300010352_001543	huge_phage_4188	280711	Camargo.et.al.2023	Engineered;Bioreactor;Anaerobic	Bioreactor	0.313757	Medium-quality	Genome-fragment	Yes	/	Yes	Viruses;Duplodnaviria;Heunggongvirae;Uroviricota;Caudoviricetes
IMGVR_UViG_3300031669_005479	huge_phage_4190	202814	Camargo.et.al.2023	Environmental;Terrestrial;Soil	Soil	0.301572	Medium-quality	Genome-fragment	Yes	/	Yes	Viruses;Duplodnaviria;Heunggongvirae;Uroviricota;Caudoviricetes
IMGVR_UViG_3300006259_000007	huge_phage_4197	232930	Camargo.et.al.2023	Host-associated;Human;Digestive system	Animal digestive system	0.417328	High-quality	High-quality	Yes	/	Yes	Viruses;Duplodnaviria;Heunggongvirae;Uroviricota;Caudoviricetes
IMGVR_UViG_3300027754_000001	huge_phage_4200	297898	Camargo.et.al.2023	Environmental;Aquatic;Freshwater	Freshwater	0.429227	Complete	High-quality	Yes	/	Yes	Viruses;Duplodnaviria;Heunggongvirae;Uroviricota;Caudoviricetes
IMGVR_UViG_3300008136_000011	huge_phage_4201	255746	Camargo.et.al.2023	Host-associated;Human;Digestive system	Animal digestive system	0.444445	High-quality	High-quality	Yes	/	Yes	Viruses;Duplodnaviria;Heunggongvirae;Uroviricota;Caudoviricetes
IMGVR_UViG_3300028275_000005	huge_phage_4203	222482	Camargo.et.al.2023	Environmental;Aquatic;Freshwater	Freshwater	0.315082	High-quality	High-quality	Yes	/	Yes	Viruses;Duplodnaviria;Heunggongvirae;Uroviricota;Caudoviricetes
IMGVR_UViG_3300023174_000039	huge_phage_4209	331654	Camargo.et.al.2023	Environmental;Aquatic;Freshwater	Freshwater	0.440622	Medium-quality	Genome-fragment	Yes	/	Yes	Viruses;Duplodnaviria;Heunggongvirae;Uroviricota;Caudoviricetes
IMGVR_UViG_3300045988_132981	huge_phage_4211	298213	Camargo.et.al.2023	Host-associated;Mammals: Human;Digestive system	Animal digestive system	0.390057	High-quality	High-quality	Yes	/	Yes	Viruses;Duplodnaviria;Heunggongvirae;Uroviricota;Caudoviricetes
IMGVR_UViG_3300010352_001565	huge_phage_4214	222710	Camargo.et.al.2023	Engineered;Bioreactor;Anaerobic	Bioreactor	0.53395	High-quality	High-quality	Yes	/	Yes	Viruses;Duplodnaviria;Heunggongvirae;Uroviricota;Caudoviricetes
IMGVR_UViG_3300039379_000022	huge_phage_4215	233248	Camargo.et.al.2023	Host-associated;Mammals: Human;Digestive system	Animal digestive system	0.342322	Medium-quality	Genome-fragment	Yes	/	Yes	Viruses;Duplodnaviria;Heunggongvirae;Uroviricota;Caudoviricetes
IMGVR_UViG_3300049793_000366	huge_phage_4216	507910	Camargo.et.al.2023	Environmental;Terrestrial;Soil	Soil	0.330366	High-quality	High-quality	Yes	/	Yes	Viruses;Duplodnaviria;Heunggongvirae;Uroviricota;Caudoviricetes
IMGVR_UViG_3300012983_000031	huge_phage_4220	220295	Camargo.et.al.2023	Host-associated;Mammals;Digestive system	Animal digestive system	0.366754	Medium-quality	Genome-fragment	Yes	/	Yes	Viruses;Duplodnaviria;Heunggongvirae;Uroviricota;Caudoviricetes
IMGVR_UViG_3300021979_000004	huge_phage_4223	217982	Camargo.et.al.2023	Environmental;Aquatic;Marine	Marine	0.35525	Medium-quality	Genome-fragment	Yes	/	Yes	Viruses;Duplodnaviria;Heunggongvirae;Uroviricota;Caudoviricetes
IMGVR_UViG_3300031087_000527	huge_phage_4225	259022	Camargo.et.al.2023	Host-associated;Plants;Phyllosphere	Plants-related	0.386604	High-quality	High-quality	Yes	/	Yes	Viruses;Duplodnaviria;Heunggongvirae;Uroviricota;Caudoviricetes
IMGVR_UViG_3300045988_154284	huge_phage_4226	398101	Camargo.et.al.2023	Host-associated;Mammals: Human;Digestive system	Animal digestive system	0.47279	High-quality	High-quality	Yes	/	Yes	Viruses;Duplodnaviria;Heunggongvirae;Uroviricota;Caudoviricetes
IMGVR_UViG_3300045999_010033	huge_phage_4233	221095	Camargo.et.al.2023	Environmental;Aquatic;Freshwater	Freshwater	0.350695	High-quality	High-quality	Yes	/	Yes	Viruses;Duplodnaviria;Heunggongvirae;Uroviricota;Caudoviricetes
IMGVR_UViG_3300045988_175598	huge_phage_4240	248461	Camargo.et.al.2023	Host-associated;Mammals: Human;Digestive system	Animal digestive system	0.368996	High-quality	High-quality	Yes	/	Yes	Viruses;Duplodnaviria;Heunggongvirae;Uroviricota;Caudoviricetes
IMGVR_UViG_3300030294_000005	huge_phage_4241	236184	Camargo.et.al.2023	Environmental;Terrestrial;Soil	Soil	0.259112	High-quality	High-quality	Yes	/	Yes	Viruses;Duplodnaviria;Heunggongvirae;Uroviricota;Caudoviricetes
IMGVR_UViG_3300009703_004110	huge_phage_4244	332270	Camargo.et.al.2023	Environmental;Aquatic;Marine	Marine	0.396963	High-quality	High-quality	Yes	/	Yes	Viruses;Duplodnaviria;Heunggongvirae;Uroviricota;Caudoviricetes
IMGVR_UViG_3300045988_133206	huge_phage_4247	269937	Camargo.et.al.2023	Host-associated;Mammals: Human;Digestive system	Animal digestive system	0.393247	High-quality	High-quality	Yes	/	Yes	Viruses;Duplodnaviria;Heunggongvirae;Uroviricota;Caudoviricetes
IMGVR_UViG_3300023049_000005	huge_phage_4248	270756	Camargo.et.al.2023	Environmental;Aquatic;Non-marine Saline and Alkaline	Non-marine Saline and Alkaline	0.298187	Medium-quality	Genome-fragment	Yes	/	Yes	Viruses;Duplodnaviria;Heunggongvirae;Uroviricota;Caudoviricetes
IMGVR_UViG_3300008274_000001	huge_phage_4254	234424	Camargo.et.al.2023	Host-associated;Human;Digestive system	Animal digestive system	0.327283	Complete	High-quality	Yes	/	Yes	Viruses;Duplodnaviria;Heunggongvirae;Uroviricota;Caudoviricetes
IMGVR_UViG_3300044646_001614	huge_phage_4255	298837	Camargo.et.al.2023	Environmental;Aquatic;Freshwater	Freshwater	0.339837	Medium-quality	Genome-fragment	Yes	/	Yes	Viruses;Duplodnaviria;Heunggongvirae;Uroviricota;Caudoviricetes
IMGVR_UViG_3300045988_180387	huge_phage_4894	359851	Camargo.et.al.2023	Host-associated;Mammals: Human;Digestive system	Animal digestive system	0.298237	High-quality	High-quality	Yes	/	Yes	Viruses;Duplodnaviria;Heunggongvirae;Uroviricota;Caudoviricetes
IMGVR_UViG_3300020122_000238	huge_phage_4261	275300	Camargo.et.al.2023	Environmental;Terrestrial;Soil	Soil	0.583781	Medium-quality	Genome-fragment	Yes	/	Yes	Viruses;Duplodnaviria;Heunggongvirae;Uroviricota;Caudoviricetes
IMGVR_UViG_3300017565_000001	huge_phage_4262	424529	Camargo.et.al.2023	Environmental;Terrestrial;Soil	Soil	0.476556	Complete	High-quality	Yes	/	Yes	Viruses;Duplodnaviria;Heunggongvirae;Uroviricota;Caudoviricetes
IMGVR_UViG_3300045988_152273	huge_phage_4264	216622	Camargo.et.al.2023	Host-associated;Mammals: Human;Digestive system	Animal digestive system	0.334214	High-quality	High-quality	Yes	/	Yes	Viruses;Duplodnaviria;Heunggongvirae;Uroviricota;Caudoviricetes
IMGVR_UViG_3300049049_000146	huge_phage_4266	423825	Camargo.et.al.2023	Environmental;Terrestrial;Soil	Soil	0.570176	Complete	High-quality	Yes	/	Yes	Viruses;Duplodnaviria;Heunggongvirae;Uroviricota;Caudoviricetes
IMGVR_UViG_3300023174_000046	huge_phage_4268	217413	Camargo.et.al.2023	Environmental;Aquatic;Freshwater	Freshwater	0.356855	High-quality	High-quality	Yes	/	Yes	Viruses;Duplodnaviria;Heunggongvirae;Uroviricota;Caudoviricetes
IMGVR_UViG_3300005326_000040	huge_phage_4270	338055	Camargo.et.al.2023	Environmental;Aquatic;Deep subsurface	Deep subsurface	0.415512	High-quality	High-quality	Yes	/	Yes	Viruses;Duplodnaviria;Heunggongvirae;Uroviricota;Caudoviricetes
IMGVR_UViG_3300009108_000751	huge_phage_4271	235681	Camargo.et.al.2023	Environmental;Aquatic;Marine	Marine	0.457249	Medium-quality	Genome-fragment	Yes	/	Yes	Viruses;Duplodnaviria;Heunggongvirae;Uroviricota;Caudoviricetes
IMGVR_UViG_3300013426_000016	huge_phage_4273	203856	Camargo.et.al.2023	Host-associated;Mammals;Digestive system	Animal digestive system	0.363487	High-quality	High-quality	Yes	/	Yes	Viruses;Duplodnaviria;Heunggongvirae;Uroviricota;Caudoviricetes
IMGVR_UViG_3300006458_000004	huge_phage_4277	340446	Camargo.et.al.2023	Host-associated;Human;Digestive system	Animal digestive system	0.364531	High-quality	High-quality	Yes	/	Yes	Viruses;Duplodnaviria;Heunggongvirae;Uroviricota;Caudoviricetes
IMGVR_UViG_3300045988_167704	huge_phage_4281	212992	Camargo.et.al.2023	Host-associated;Mammals: Human;Digestive system	Animal digestive system	0.3279	High-quality	High-quality	Yes	/	Yes	Viruses;Duplodnaviria;Heunggongvirae;Uroviricota;Caudoviricetes
IMGVR_UViG_3300042350_004191	huge_phage_4286	210586	Camargo.et.al.2023	Environmental;Aquatic;Freshwater	Freshwater	0.323184	High-quality	High-quality	Yes	/	Yes	Viruses;Duplodnaviria;Heunggongvirae;Uroviricota;Caudoviricetes
IMGVR_UViG_3300037882_003354	huge_phage_4287	322512	Camargo.et.al.2023	Environmental;Aquatic;Freshwater	Freshwater	0.479191	Complete	High-quality	Yes	/	Yes	Viruses;Duplodnaviria;Heunggongvirae;Uroviricota;Caudoviricetes
IMGVR_UViG_3300017650_000009	huge_phage_4292	434884	Camargo.et.al.2023	Environmental;Terrestrial;Soil	Soil	0.424187	Medium-quality	Genome-fragment	Yes	/	Yes	Viruses;Duplodnaviria;Heunggongvirae;Uroviricota;Caudoviricetes
IMGVR_UViG_3300012931_000759	huge_phage_4298	340392	Camargo.et.al.2023	Environmental;Aquatic;Freshwater	Freshwater	0.557099	High-quality	High-quality	Yes	/	Yes	Viruses;Duplodnaviria;Heunggongvirae;Uroviricota;Caudoviricetes
IMGVR_UViG_3300026484_000007	huge_phage_4301	272602	Camargo.et.al.2023	Environmental;Aquatic;Marine	Marine	0.27195	High-quality	High-quality	Yes	/	Yes	Viruses;Duplodnaviria;Heunggongvirae;Uroviricota;Caudoviricetes
IMGVR_UViG_3300024493_000235	huge_phage_4302	268442	Camargo.et.al.2023	Host-associated;Arthropoda: Insects;Digestive system	Animal digestive system	0.368139	High-quality	High-quality	Yes	/	Yes	Viruses;Duplodnaviria;Heunggongvirae;Uroviricota;Caudoviricetes
IMGVR_UViG_3300005056_000001	huge_phage_4307	368109	Camargo.et.al.2023	Environmental;Aquatic;Marine	Marine	0.380817	Complete	High-quality	Yes	/	Yes	Viruses;Duplodnaviria;Heunggongvirae;Uroviricota;Caudoviricetes
IMGVR_UViG_3300042291_000844	huge_phage_4310	237724	Camargo.et.al.2023	Environmental;Aquatic;Freshwater	Freshwater	0.314911	High-quality	High-quality	Yes	/	Yes	Viruses;Duplodnaviria;Heunggongvirae;Uroviricota;Caudoviricetes
IMGVR_UViG_3300042473_001265	huge_phage_4313	340172	Camargo.et.al.2023	Environmental;Aquatic;Freshwater	Freshwater	0.446165	High-quality	High-quality	Yes	/	Yes	Viruses;Duplodnaviria;Heunggongvirae;Uroviricota;Caudoviricetes
IMGVR_UViG_3300028914_000002	huge_phage_4314	215311	Camargo.et.al.2023	Host-associated;Mammals;Digestive system	Animal digestive system	0.463771	Complete	High-quality	Yes	/	Yes	Viruses;Duplodnaviria;Heunggongvirae;Uroviricota;Caudoviricetes
IMGVR_UViG_3300049448_000780	huge_phage_4315	255110	Camargo.et.al.2023	Environmental;Terrestrial;Soil	Soil	0.578707	Medium-quality	Genome-fragment	Yes	/	Yes	Viruses;Duplodnaviria;Heunggongvirae;Uroviricota;Caudoviricetes
IMGVR_UViG_3300025161_000004	huge_phage_4317	246768	Camargo.et.al.2023	Environmental;Aquatic;Thermal springs	Others	0.285503	Medium-quality	Genome-fragment	Yes	/	Yes	Viruses;Duplodnaviria;Heunggongvirae;Uroviricota;Caudoviricetes
IMGVR_UViG_3300041411_000178	huge_phage_4325	224004	Camargo.et.al.2023	Host-associated;Plants;Roots	Plants-related	0.514504	Complete	High-quality	Yes	/	Yes	Viruses;Duplodnaviria;Heunggongvirae;Uroviricota;Caudoviricetes
IMGVR_UViG_3300037264_008423	huge_phage_4327	238436	Camargo.et.al.2023	Environmental;Aquatic;Freshwater	Freshwater	0.572338	High-quality	High-quality	Yes	/	Yes	Viruses;Duplodnaviria;Heunggongvirae;Uroviricota;Caudoviricetes
IMGVR_UViG_3300022666_000111	huge_phage_4332	341404	Camargo.et.al.2023	Engineered;Bioreactor;Anaerobic	Bioreactor	0.59267	Medium-quality	Genome-fragment	Yes	/	Yes	Viruses;Duplodnaviria;Heunggongvirae;Uroviricota;Caudoviricetes
IMGVR_UViG_3300034061_006011	huge_phage_4335	237814	Camargo.et.al.2023	Environmental;Aquatic;Freshwater	Freshwater	0.336763	High-quality	High-quality	Yes	/	Yes	Viruses;Duplodnaviria;Heunggongvirae;Uroviricota;Caudoviricetes
IMGVR_UViG_3300028591_000078	huge_phage_4336	238365	Camargo.et.al.2023	Host-associated;Mammals;Digestive system	Animal digestive system	0.346636	High-quality	High-quality	Yes	/	Yes	Viruses;Duplodnaviria;Heunggongvirae;Uroviricota;Caudoviricetes
IMGVR_UViG_3300034106_004043	huge_phage_4338	306662	Camargo.et.al.2023	Environmental;Aquatic;Freshwater	Freshwater	0.319883	High-quality	High-quality	Yes	/	Yes	Viruses;Duplodnaviria;Heunggongvirae;Uroviricota;Caudoviricetes
IMGVR_UViG_3300042453_005404	huge_phage_4339	260466	Camargo.et.al.2023	Environmental;Aquatic;Freshwater	Freshwater	0.401503	Medium-quality	Genome-fragment	Yes	/	Yes	Viruses;Duplodnaviria;Heunggongvirae;Uroviricota;Caudoviricetes
IMGVR_UViG_3300008136_000223	huge_phage_4342	236182	Camargo.et.al.2023	Host-associated;Human;Digestive system	Animal digestive system	0.35844	Complete	High-quality	Yes	/	Yes	Viruses;Duplodnaviria;Heunggongvirae;Uroviricota;Caudoviricetes
IMGVR_UViG_3300046522_000316	huge_phage_4343	314289	Camargo.et.al.2023	Host-associated;Plants;Roots	Plants-related	0.507924	High-quality	High-quality	Yes	/	Yes	Viruses;Duplodnaviria;Heunggongvirae;Uroviricota;Caudoviricetes
IMGVR_UViG_3300008448_000001	huge_phage_4351	204794	Camargo.et.al.2023	Environmental;Aquatic;Freshwater	Freshwater	0.51667	Complete	High-quality	Yes	/	Yes	Viruses;Duplodnaviria;Heunggongvirae;Uroviricota;Caudoviricetes
IMGVR_UViG_3300042970_000025	huge_phage_4361	214217	Camargo.et.al.2023	Engineered;Bioreactor;Anaerobic	Bioreactor	0.475877	High-quality	High-quality	Yes	/	Yes	Viruses;Duplodnaviria;Heunggongvirae;Uroviricota;Caudoviricetes
IMGVR_UViG_3300020165_000007	huge_phage_4366	270383	Camargo.et.al.2023	Environmental;Aquatic;Marine	Marine	0.329976	Medium-quality	Genome-fragment	Yes	/	Yes	Viruses;Duplodnaviria;Heunggongvirae;Uroviricota;Caudoviricetes
IMGVR_UViG_3300027759_000046	huge_phage_4370	253137	Camargo.et.al.2023	Environmental;Aquatic;Freshwater	Freshwater	0.390239	Medium-quality	Genome-fragment	Yes	/	Yes	Viruses;Duplodnaviria;Heunggongvirae;Uroviricota;Caudoviricetes
IMGVR_UViG_3300035703_000006	huge_phage_4375	247112	Camargo.et.al.2023	Environmental;Aquatic;Deep subsurface	Deep subsurface	0.341424	High-quality	High-quality	Yes	/	Yes	Viruses;Duplodnaviria;Heunggongvirae;Uroviricota;Caudoviricetes
IMGVR_UViG_3300010346_000241	huge_phage_4381	229448	Camargo.et.al.2023	Engineered;Bioreactor;Anaerobic	Bioreactor	0.407901	High-quality	High-quality	Yes	/	Yes	Viruses;Duplodnaviria;Heunggongvirae;Uroviricota;Caudoviricetes
IMGVR_UViG_3300046660_000219	huge_phage_4385	205908	Camargo.et.al.2023	Host-associated;Plants;Roots	Plants-related	0.538075	Complete	High-quality	Yes	/	Yes	Viruses;Duplodnaviria;Heunggongvirae;Uroviricota;Caudoviricetes
IMGVR_UViG_2799112923_000001	huge_phage_4387	409734	Camargo.et.al.2023	Host-associated;Mammals;Digestive system	Animal digestive system	0.33554	Complete	High-quality	Yes	/	Yes	Viruses;Duplodnaviria;Heunggongvirae;Uroviricota;Caudoviricetes
IMGVR_UViG_3300017780_003104	huge_phage_4390	211724	Camargo.et.al.2023	Environmental;Aquatic;Freshwater	Freshwater	0.341657	Complete	High-quality	Yes	/	Yes	Viruses;Duplodnaviria;Heunggongvirae;Uroviricota;Caudoviricetes
IMGVR_UViG_3300031555_003155	huge_phage_4391	209779	Camargo.et.al.2023	Host-associated;Mammals;Digestive system	Animal digestive system	0.295573	Medium-quality	Genome-fragment	Yes	/	Yes	Viruses;Duplodnaviria;Heunggongvirae;Uroviricota;Caudoviricetes
IMGVR_UViG_3300032030_000005	huge_phage_4397	305865	Camargo.et.al.2023	Host-associated;Mammals;Digestive system	Animal digestive system	0.273313	High-quality	High-quality	Yes	/	Yes	Viruses;Duplodnaviria;Heunggongvirae;Uroviricota;Caudoviricetes
IMGVR_UViG_3300008522_000006	huge_phage_4401	395600	Camargo.et.al.2023	Host-associated;Human;Digestive system	Animal digestive system	0.262318	Medium-quality	Genome-fragment	Yes	/	Yes	Viruses;Duplodnaviria;Heunggongvirae;Uroviricota;Caudoviricetes
IMGVR_UViG_3300014202_000879	huge_phage_4402	207092	Camargo.et.al.2023	Engineered;Bioreactor;Continuous culture	Bioreactor	0.500951	Medium-quality	Genome-fragment	Yes	/	Yes	Viruses;Duplodnaviria;Heunggongvirae;Uroviricota;Caudoviricetes
IMGVR_UViG_3300045988_067909	huge_phage_4407	260558	Camargo.et.al.2023	Host-associated;Mammals: Human;Digestive system	Animal digestive system	0.335388	Complete	High-quality	Yes	/	Yes	Viruses;Duplodnaviria;Heunggongvirae;Uroviricota;Caudoviricetes
IMGVR_UViG_3300002641_000714	huge_phage_4408	204228	Camargo.et.al.2023	Host-associated;Mammals;Digestive system	Animal digestive system	0.278434	Low-quality	Genome-fragment	Yes	/	Yes	Viruses;Duplodnaviria;Heunggongvirae;Uroviricota;Caudoviricetes
IMGVR_UViG_3300031951_000008	huge_phage_4410	217639	Camargo.et.al.2023	Environmental;Aquatic;Freshwater	Freshwater	0.422608	Medium-quality	Genome-fragment	Yes	/	Yes	Viruses;Duplodnaviria;Heunggongvirae;Uroviricota;Caudoviricetes
IMGVR_UViG_3300045988_147927	huge_phage_4412	202994	Camargo.et.al.2023	Host-associated;Mammals: Human;Digestive system	Animal digestive system	0.30662	Complete	High-quality	Yes	/	Yes	Viruses;Duplodnaviria;Heunggongvirae;Uroviricota;Caudoviricetes
IMGVR_UViG_3300045988_146552	huge_phage_4414	203365	Camargo.et.al.2023	Host-associated;Mammals: Human;Digestive system	Animal digestive system	0.341371	High-quality	High-quality	Yes	/	Yes	Viruses;Duplodnaviria;Heunggongvirae;Uroviricota;Caudoviricetes
IMGVR_UViG_3300042544_001590	huge_phage_4415	207489	Camargo.et.al.2023	Environmental;Aquatic;Freshwater	Freshwater	0.394349	Complete	High-quality	Yes	/	Yes	Viruses;Duplodnaviria;Heunggongvirae;Uroviricota;Caudoviricetes
IMGVR_UViG_3300024239_000014	huge_phage_4416	249640	Camargo.et.al.2023	Environmental;Terrestrial;Deep subsurface	Deep subsurface	0.515835	High-quality	High-quality	Yes	/	Yes	Viruses;Duplodnaviria;Heunggongvirae;Uroviricota;Caudoviricetes
IMGVR_UViG_3300024262_006558	huge_phage_4422	388594	Camargo.et.al.2023	Environmental;Aquatic;Marine	Marine	0.338986	Medium-quality	Genome-fragment	Yes	/	Yes	Viruses;Duplodnaviria;Heunggongvirae;Uroviricota;Caudoviricetes
IMGVR_UViG_3300035703_002708	huge_phage_4423	316559	Camargo.et.al.2023	Environmental;Aquatic;Deep subsurface	Deep subsurface	0.332207	High-quality	High-quality	Yes	/	Yes	Viruses;Duplodnaviria;Heunggongvirae;Uroviricota;Caudoviricetes
IMGVR_UViG_3300047322_001237	huge_phage_4425	278988	Camargo.et.al.2023	Host-associated;Plants;Roots	Plants-related	0.580383	Complete	High-quality	Yes	/	Yes	Viruses;Duplodnaviria;Heunggongvirae;Uroviricota;Caudoviricetes
IMGVR_UViG_3300034072_001021	huge_phage_4426	259140	Camargo.et.al.2023	Environmental;Aquatic;Deep subsurface	Deep subsurface	0.512414	Complete	High-quality	Yes	/	Yes	Viruses;Duplodnaviria;Heunggongvirae;Uroviricota;Caudoviricetes
IMGVR_UViG_3300032093_000003	huge_phage_4430	286787	Camargo.et.al.2023	Environmental;Aquatic;Freshwater	Freshwater	0.304899	Medium-quality	Genome-fragment	Yes	/	Yes	Viruses;Duplodnaviria;Heunggongvirae;Uroviricota;Caudoviricetes
IMGVR_UViG_3300043080_000590	huge_phage_4431	379029	Camargo.et.al.2023	Host-associated;Mammals;Digestive system	Animal digestive system	0.257996	Medium-quality	Genome-fragment	Yes	/	Yes	Viruses;Duplodnaviria;Heunggongvirae;Uroviricota;Caudoviricetes
IMGVR_UViG_3300050192_000209	huge_phage_4434	219301	Camargo.et.al.2023	Environmental;Terrestrial;Soil	Soil	0.587289	High-quality	High-quality	Yes	/	Yes	Viruses;Duplodnaviria;Heunggongvirae;Uroviricota;Caudoviricetes
IMGVR_UViG_3300031993_000003	huge_phage_4436	284234	Camargo.et.al.2023	Host-associated;Mammals;Digestive system	Animal digestive system	0.555577	Complete	High-quality	Yes	/	Yes	Viruses;Duplodnaviria;Heunggongvirae;Uroviricota;Caudoviricetes
IMGVR_UViG_3300033463_000004	huge_phage_4437	262694	Camargo.et.al.2023	Host-associated;Mammals;Digestive system	Animal digestive system	0.372825	High-quality	High-quality	Yes	/	Yes	Viruses;Duplodnaviria;Heunggongvirae;Uroviricota;Caudoviricetes
IMGVR_UViG_3300034104_004584	huge_phage_4440	205907	Camargo.et.al.2023	Environmental;Aquatic;Freshwater	Freshwater	0.372008	Complete	High-quality	Yes	/	Yes	Viruses;Duplodnaviria;Heunggongvirae;Uroviricota;Caudoviricetes
IMGVR_UViG_3300023213_000432	huge_phage_4445	327423	Camargo.et.al.2023	Environmental;Terrestrial;Geologic	Others	0.384848	High-quality	High-quality	Yes	/	Yes	Viruses;Duplodnaviria;Heunggongvirae;Uroviricota;Caudoviricetes
IMGVR_UViG_3300009034_000001	huge_phage_4448	241415	Camargo.et.al.2023	Environmental;Aquatic;Marine	Marine	0.396398	High-quality	High-quality	Yes	/	Yes	Viruses;Duplodnaviria;Heunggongvirae;Uroviricota;Caudoviricetes
IMGVR_UViG_3300032227_001172	huge_phage_4452	230691	Camargo.et.al.2023	Environmental;Aquatic;Freshwater	Freshwater	0.336493	Complete	High-quality	Yes	/	Yes	Viruses;Duplodnaviria;Heunggongvirae;Uroviricota;Caudoviricetes
IMGVR_UViG_3300048625_000299	huge_phage_4455	234864	Camargo.et.al.2023	Environmental;Aquatic;Freshwater	Freshwater	0.452002	Complete	High-quality	Yes	/	Yes	Viruses;Duplodnaviria;Heunggongvirae;Uroviricota;Caudoviricetes
IMGVR_UViG_3300042934_000594	huge_phage_4459	269430	Camargo.et.al.2023	Environmental;Terrestrial;Soil	Soil	0.559785	High-quality	High-quality	Yes	/	Yes	Viruses;Duplodnaviria;Heunggongvirae;Uroviricota;Caudoviricetes
IMGVR_UViG_3300032236_001858	huge_phage_4460	481145	Camargo.et.al.2023	Environmental;Aquatic;Freshwater	Freshwater	0.298625	High-quality	High-quality	Yes	/	Yes	Viruses;Duplodnaviria;Heunggongvirae;Uroviricota;Caudoviricetes
IMGVR_UViG_3300008537_000001	huge_phage_4465	235593	Camargo.et.al.2023	Host-associated;Human;Digestive system	Animal digestive system	0.284516	Complete	High-quality	Yes	/	Yes	Viruses;Duplodnaviria;Heunggongvirae;Uroviricota;Caudoviricetes
IMGVR_UViG_3300023180_000014	huge_phage_4468	219843	Camargo.et.al.2023	Environmental;Aquatic;Marine	Marine	0.409256	Medium-quality	Genome-fragment	Yes	/	Yes	Viruses;Duplodnaviria;Heunggongvirae;Uroviricota;Caudoviricetes
IMGVR_UViG_3300017971_000186	huge_phage_4472	469541	Camargo.et.al.2023	Environmental;Aquatic;Non-marine Saline and Alkaline	Non-marine Saline and Alkaline	0.341744	High-quality	High-quality	Yes	/	Yes	Viruses;Duplodnaviria;Heunggongvirae;Uroviricota;Caudoviricetes
IMGVR_UViG_3300037247_001786	huge_phage_4474	460978	Camargo.et.al.2023	Environmental;Aquatic;Marine	Marine	0.342925	Complete	High-quality	Yes	/	Yes	Viruses;Duplodnaviria;Heunggongvirae;Uroviricota;Caudoviricetes
IMGVR_UViG_3300038361_000164	huge_phage_4480	210263	Camargo.et.al.2023	Environmental;Aquatic;Marine	Marine	0.358965	High-quality	High-quality	Yes	/	Yes	Viruses;Duplodnaviria;Heunggongvirae;Uroviricota;Caudoviricetes
IMGVR_UViG_3300042997_002652	huge_phage_4485	266967	Camargo.et.al.2023	Environmental;Aquatic;Freshwater	Freshwater	0.362165	Medium-quality	Genome-fragment	Yes	/	Yes	Viruses;Duplodnaviria;Heunggongvirae;Uroviricota;Caudoviricetes
IMGVR_UViG_3300023214_000724	huge_phage_4491	273388	Camargo.et.al.2023	Environmental;Aquatic;Non-marine Saline and Alkaline	Non-marine Saline and Alkaline	0.412783	Medium-quality	Genome-fragment	Yes	/	Yes	Viruses;Duplodnaviria;Heunggongvirae;Uroviricota;Caudoviricetes
IMGVR_UViG_3300025410_000009	huge_phage_4493	222610	Camargo.et.al.2023	Environmental;Aquatic;Freshwater	Freshwater	0.453883	Medium-quality	Genome-fragment	Yes	/	Yes	Viruses;Duplodnaviria;Heunggongvirae;Uroviricota;Caudoviricetes
IMGVR_UViG_3300042511_000879	huge_phage_4497	236071	Camargo.et.al.2023	Environmental;Aquatic;Freshwater	Freshwater	0.339135	Medium-quality	Genome-fragment	Yes	/	Yes	Viruses;Duplodnaviria;Heunggongvirae;Uroviricota;Caudoviricetes
IMGVR_UViG_3300045974_000132	huge_phage_4500	286393	Camargo.et.al.2023	Environmental;Aquatic;Freshwater	Freshwater	0.43677	Complete	High-quality	Yes	/	Yes	Viruses;Duplodnaviria;Heunggongvirae;Uroviricota;Caudoviricetes
IMGVR_UViG_3300033463_000007	huge_phage_4505	232051	Camargo.et.al.2023	Host-associated;Mammals;Digestive system	Animal digestive system	0.306282	High-quality	High-quality	Yes	/	Yes	Viruses;Duplodnaviria;Heunggongvirae;Uroviricota;Caudoviricetes
IMGVR_UViG_3300044675_007236	huge_phage_4506	214069	Camargo.et.al.2023	Environmental;Aquatic;Freshwater	Freshwater	0.458801	High-quality	High-quality	Yes	/	Yes	Viruses;Duplodnaviria;Heunggongvirae;Uroviricota;Caudoviricetes
IMGVR_UViG_3300025437_000009	huge_phage_4510	266957	Camargo.et.al.2023	Environmental;Aquatic;Freshwater	Freshwater	0.397424	Medium-quality	Genome-fragment	Yes	/	Yes	Viruses;Duplodnaviria;Heunggongvirae;Uroviricota;Caudoviricetes
IMGVR_UViG_3300007119_000005	huge_phage_4516	243579	Camargo.et.al.2023	Host-associated;Human;Digestive system	Animal digestive system	0.380713	High-quality	High-quality	Yes	/	Yes	Viruses;Duplodnaviria;Heunggongvirae;Uroviricota;Caudoviricetes
IMGVR_UViG_3300031759_000001	huge_phage_4519	363370	Camargo.et.al.2023	Environmental;Aquatic;Freshwater	Freshwater	0.411055	High-quality	High-quality	Yes	/	Yes	Viruses;Duplodnaviria;Heunggongvirae;Uroviricota;Caudoviricetes
IMGVR_UViG_3300050014_000823	huge_phage_4521	299144	Camargo.et.al.2023	Environmental;Terrestrial;Soil	Soil	0.350383	High-quality	High-quality	Yes	/	Yes	Viruses;Duplodnaviria;Heunggongvirae;Uroviricota;Caudoviricetes
IMGVR_UViG_3300006678_000005	huge_phage_4523	350247	Camargo.et.al.2023	Host-associated;Human;Digestive system	Animal digestive system	0.36436	High-quality	High-quality	Yes	/	Yes	Viruses;Duplodnaviria;Heunggongvirae;Uroviricota;Caudoviricetes
IMGVR_UViG_3300021520_000002	huge_phage_4535	285572	Camargo.et.al.2023	Environmental;Aquatic;Freshwater	Freshwater	0.294153	High-quality	High-quality	Yes	/	Yes	Viruses;Duplodnaviria;Heunggongvirae;Uroviricota;Caudoviricetes
IMGVR_UViG_3300045988_162923	huge_phage_4539	200290	Camargo.et.al.2023	Host-associated;Mammals: Human;Digestive system	Animal digestive system	0.316606	High-quality	High-quality	Yes	/	Yes	Viruses;Duplodnaviria;Heunggongvirae;Uroviricota;Caudoviricetes
IMGVR_UViG_3300044856_000241	huge_phage_4542	203624	Camargo.et.al.2023	Engineered;Bioreactor;Anaerobic	Bioreactor	0.335766	High-quality	High-quality	Yes	/	Yes	Viruses;Duplodnaviria;Heunggongvirae;Uroviricota;Caudoviricetes
IMGVR_UViG_3300043567_000723	huge_phage_4544	202131	Camargo.et.al.2023	Environmental;Aquatic;Freshwater	Freshwater	0.521746	Complete	High-quality	Yes	/	Yes	Viruses;Duplodnaviria;Heunggongvirae;Uroviricota;Caudoviricetes
IMGVR_UViG_3300028832_000001	huge_phage_4558	415750	Camargo.et.al.2023	Host-associated;Mammals;Digestive system	Animal digestive system	0.341511	Complete	High-quality	Yes	/	Yes	Viruses;Duplodnaviria;Heunggongvirae;Uroviricota;Caudoviricetes
IMGVR_UViG_3300047472_000309	huge_phage_4560	310654	Camargo.et.al.2023	Host-associated;Plants;Roots	Plants-related	0.560901	Complete	High-quality	Yes	/	Yes	Viruses;Duplodnaviria;Heunggongvirae;Uroviricota;Caudoviricetes
IMGVR_UViG_3300032007_000015	huge_phage_4561	227182	Camargo.et.al.2023	Host-associated;Mammals;Digestive system	Animal digestive system	0.260263	High-quality	High-quality	Yes	/	Yes	Viruses;Duplodnaviria;Heunggongvirae;Uroviricota;Caudoviricetes
IMGVR_UViG_3300037851_000570	huge_phage_4564	202100	Camargo.et.al.2023	Environmental;Aquatic;Thermal springs	Others	0.60472	Complete	High-quality	Yes	/	Yes	Viruses;Duplodnaviria;Heunggongvirae;Uroviricota;Caudoviricetes
IMGVR_UViG_3300025389_000010	huge_phage_4569	225756	Camargo.et.al.2023	Environmental;Aquatic;Freshwater	Freshwater	0.319814	High-quality	High-quality	Yes	/	Yes	Viruses;Duplodnaviria;Heunggongvirae;Uroviricota;Caudoviricetes
IMGVR_UViG_3300029922_000001	huge_phage_4573	441498	Camargo.et.al.2023	Environmental;Terrestrial;Soil	Soil	0.338867	High-quality	High-quality	Yes	/	Yes	Viruses;Duplodnaviria;Heunggongvirae;Uroviricota;Caudoviricetes
IMGVR_UViG_3300006922_000005	huge_phage_4574	266188	Camargo.et.al.2023	Environmental;Aquatic;Marine	Marine	0.354486	Medium-quality	Genome-fragment	Yes	/	Yes	Viruses;Duplodnaviria;Heunggongvirae;Uroviricota;Caudoviricetes
IMGVR_UViG_3300008412_000005	huge_phage_4578	236987	Camargo.et.al.2023	Host-associated;Human;Digestive system	Animal digestive system	0.423323	High-quality	High-quality	Yes	/	Yes	Viruses;Duplodnaviria;Heunggongvirae;Uroviricota;Caudoviricetes
IMGVR_UViG_3300042890_002891	huge_phage_4580	261673	Camargo.et.al.2023	Environmental;Aquatic;Freshwater	Freshwater	0.452508	Medium-quality	Genome-fragment	Yes	/	Yes	Viruses;Duplodnaviria;Heunggongvirae;Uroviricota;Caudoviricetes
IMGVR_UViG_3300011577_000001	huge_phage_4581	240392	Camargo.et.al.2023	Engineered;Built environment;City	Built environment	0.524273	Medium-quality	Genome-fragment	Yes	/	Yes	Viruses;Duplodnaviria;Heunggongvirae;Uroviricota;Caudoviricetes
IMGVR_UViG_3300031576_000001	huge_phage_4585	322633	Camargo.et.al.2023	Environmental;Aquatic;Deep subsurface	Deep subsurface	0.585913	Medium-quality	Genome-fragment	Yes	/	Yes	Viruses;Duplodnaviria;Heunggongvirae;Uroviricota;Caudoviricetes
IMGVR_UViG_3300017716_001697	huge_phage_4591	364576	Camargo.et.al.2023	Environmental;Aquatic;Freshwater	Freshwater	0.416116	Complete	High-quality	Yes	/	Yes	Viruses;Duplodnaviria;Heunggongvirae;Uroviricota;Caudoviricetes
IMGVR_UViG_3300037424_000434	huge_phage_4595	235765	Camargo.et.al.2023	Environmental;Aquatic;Floodplain	Others	0.3903	High-quality	High-quality	Yes	/	Yes	Viruses;Duplodnaviria;Heunggongvirae;Uroviricota;Caudoviricetes
IMGVR_UViG_3300031992_000008	huge_phage_4604	235300	Camargo.et.al.2023	Host-associated;Mammals;Digestive system	Animal digestive system	0.408887	High-quality	High-quality	Yes	/	Yes	Viruses;Duplodnaviria;Heunggongvirae;Uroviricota;Caudoviricetes
IMGVR_UViG_3300037321_000115	huge_phage_4606	263791	Camargo.et.al.2023	Environmental;Aquatic;Non-marine Saline and Alkaline	Non-marine Saline and Alkaline	0.455728	High-quality	High-quality	Yes	/	Yes	Viruses;Duplodnaviria;Heunggongvirae;Uroviricota;Caudoviricetes
IMGVR_UViG_3300035492_000078	huge_phage_4608	302518	Camargo.et.al.2023	Environmental;Terrestrial;Asphalt lakes	Others	0.41975	Medium-quality	Genome-fragment	Yes	/	Yes	Viruses;Duplodnaviria;Heunggongvirae;Uroviricota;Caudoviricetes
IMGVR_UViG_3300040781_000350	huge_phage_4609	221420	Camargo.et.al.2023	Environmental;Aquatic;Marine	Marine	0.355289	High-quality	High-quality	Yes	/	Yes	Viruses;Duplodnaviria;Heunggongvirae;Uroviricota;Caudoviricetes
IMGVR_UViG_3300045988_180135	huge_phage_4614	346615	Camargo.et.al.2023	Host-associated;Mammals: Human;Digestive system	Animal digestive system	0.467369	High-quality	High-quality	Yes	/	Yes	Viruses;Duplodnaviria;Heunggongvirae;Uroviricota;Caudoviricetes
IMGVR_UViG_3300036546_000248	huge_phage_4615	216210	Camargo.et.al.2023	Environmental;Aquatic;Deep subsurface	Deep subsurface	0.510407	Medium-quality	Genome-fragment	Yes	/	Yes	Viruses;Duplodnaviria;Heunggongvirae;Uroviricota;Caudoviricetes
IMGVR_UViG_3300017917_001123	huge_phage_4616	331570	Camargo.et.al.2023	Environmental;Aquatic;Freshwater	Freshwater	0.409292	Medium-quality	Genome-fragment	Yes	/	Yes	Viruses;Duplodnaviria;Heunggongvirae;Uroviricota;Caudoviricetes
IMGVR_UViG_3300043418_000114	huge_phage_4617	364247	Camargo.et.al.2023	Environmental;Aquatic;Freshwater	Freshwater	0.410356	Complete	High-quality	Yes	/	Yes	Viruses;Duplodnaviria;Heunggongvirae;Uroviricota;Caudoviricetes
IMGVR_UViG_3300031344_000002	huge_phage_4618	218381	Camargo.et.al.2023	Host-associated;Plants;Roots	Plants-related	0.263081	Medium-quality	Genome-fragment	Yes	/	Yes	Viruses;Duplodnaviria;Heunggongvirae;Uroviricota;Caudoviricetes
IMGVR_UViG_3300044878_000087	huge_phage_4621	310743	Camargo.et.al.2023	Engineered;Built environment;Canal	Built environment	0.472757	Complete	High-quality	Yes	/	Yes	Viruses;Duplodnaviria;Heunggongvirae;Uroviricota;Caudoviricetes
IMGVR_UViG_3300032167_003421	huge_phage_4622	276180	Camargo.et.al.2023	Host-associated;Mammals;Digestive system	Animal digestive system	0.279148	Complete	High-quality	Yes	/	Yes	Viruses;Duplodnaviria;Heunggongvirae;Uroviricota;Caudoviricetes
IMGVR_UViG_3300029288_000067	huge_phage_4624	224066	Camargo.et.al.2023	Engineered;Solid waste;Landfill	Landfill	0.39383	Medium-quality	Genome-fragment	Yes	/	Yes	Viruses;Duplodnaviria;Heunggongvirae;Uroviricota;Caudoviricetes
IMGVR_UViG_3300032092_000001	huge_phage_4625	285295	Camargo.et.al.2023	Environmental;Aquatic;Freshwater	Freshwater	0.324818	High-quality	High-quality	Yes	/	Yes	Viruses;Duplodnaviria;Heunggongvirae;Uroviricota;Caudoviricetes
IMGVR_UViG_3300020471_000004	huge_phage_4628	232692	Camargo.et.al.2023	Environmental;Aquatic;Marine	Marine	0.405661	High-quality	High-quality	Yes	/	Yes	Viruses;Duplodnaviria;Heunggongvirae;Uroviricota;Caudoviricetes
IMGVR_UViG_3300022074_005559	huge_phage_4632	209981	Camargo.et.al.2023	Environmental;Aquatic;Marine	Marine	0.401727	Medium-quality	Genome-fragment	Yes	/	Yes	Viruses;Duplodnaviria;Heunggongvirae;Uroviricota;Caudoviricetes
IMGVR_UViG_3300031952_000001	huge_phage_4636	211982	Camargo.et.al.2023	Environmental;Aquatic;Freshwater	Freshwater	0.59756	High-quality	High-quality	Yes	/	Yes	Viruses;Duplodnaviria;Heunggongvirae;Uroviricota;Caudoviricetes
IMGVR_UViG_3300008262_000055	huge_phage_4640	281428	Camargo.et.al.2023	Environmental;Aquatic;Freshwater	Freshwater	0.378356	Medium-quality	Genome-fragment	Yes	/	Yes	Viruses;Duplodnaviria;Heunggongvirae;Uroviricota;Caudoviricetes
IMGVR_UViG_3300037722_001090	huge_phage_4645	205327	Camargo.et.al.2023	Environmental;Aquatic;Floodplain	Others	0.357829	High-quality	High-quality	Yes	/	Yes	Viruses;Duplodnaviria;Heunggongvirae;Uroviricota;Caudoviricetes
IMGVR_UViG_3300031418_000001	huge_phage_4648	349404	Camargo.et.al.2023	Host-associated;Plants;Phyllosphere	Plants-related	0.34675	Complete	High-quality	Yes	/	Yes	Viruses;Duplodnaviria;Heunggongvirae;Uroviricota;Caudoviricetes
IMGVR_UViG_3300013121_000033	huge_phage_4655	225159	Camargo.et.al.2023	Engineered;WWTP;Activated Sludge	WWTP	0.681812	High-quality	High-quality	Yes	/	Yes	Viruses;Duplodnaviria;Heunggongvirae;Uroviricota;Caudoviricetes
IMGVR_UViG_3300020188_000808	huge_phage_4659	267783	Camargo.et.al.2023	Environmental;Aquatic;Marine	Marine	0.364198	Medium-quality	Genome-fragment	Yes	/	Yes	Viruses;Duplodnaviria;Heunggongvirae;Uroviricota;Caudoviricetes
IMGVR_UViG_3300011113_000640	huge_phage_4661	320541	Camargo.et.al.2023	Environmental;Aquatic;Freshwater	Freshwater	0.459311	Medium-quality	Genome-fragment	Yes	/	Yes	Viruses;Duplodnaviria;Heunggongvirae;Uroviricota;Caudoviricetes
IMGVR_UViG_3300039412_000300	huge_phage_4662	215641	Camargo.et.al.2023	Environmental;Terrestrial;Soil	Soil	0.507366	High-quality	High-quality	Yes	/	Yes	Viruses;Duplodnaviria;Heunggongvirae;Uroviricota;Caudoviricetes
IMGVR_UViG_3300033066_001295	huge_phage_4670	207816	Camargo.et.al.2023	Engineered;WWTP;Activated Sludge	WWTP	0.475425	High-quality	High-quality	Yes	/	Yes	Viruses;Duplodnaviria;Heunggongvirae;Uroviricota;Caudoviricetes
IMGVR_UViG_3300037423_001597	huge_phage_4676	250291	Camargo.et.al.2023	Environmental;Terrestrial;Soil	Soil	0.397278	High-quality	High-quality	Yes	/	Yes	Viruses;Duplodnaviria;Heunggongvirae;Uroviricota;Caudoviricetes
IMGVR_UViG_3300025723_000013	huge_phage_4681	256199	Camargo.et.al.2023	Environmental;Aquatic;Freshwater	Freshwater	0.417332	Medium-quality	Genome-fragment	Yes	/	Yes	Viruses;Duplodnaviria;Heunggongvirae;Uroviricota;Caudoviricetes
IMGVR_UViG_3300027754_000034	huge_phage_4682	257205	Camargo.et.al.2023	Environmental;Aquatic;Freshwater	Freshwater	0.398258	Medium-quality	Genome-fragment	Yes	/	Yes	Viruses;Duplodnaviria;Heunggongvirae;Uroviricota;Caudoviricetes
IMGVR_UViG_3300011693_000001	huge_phage_4683	259605	Camargo.et.al.2023	Engineered;Built environment;City	Built environment	0.461459	Complete	High-quality	Yes	/	Yes	Viruses;Duplodnaviria;Heunggongvirae;Uroviricota;Caudoviricetes
IMGVR_UViG_3300042305_001773	huge_phage_4685	205044	Camargo.et.al.2023	Environmental;Aquatic;Freshwater	Freshwater	0.554223	High-quality	High-quality	Yes	/	Yes	Viruses;Duplodnaviria;Heunggongvirae;Uroviricota;Caudoviricetes
IMGVR_UViG_3300022752_000016	huge_phage_4686	205163	Camargo.et.al.2023	Environmental;Aquatic;Freshwater	Freshwater	0.325073	Medium-quality	Genome-fragment	Yes	/	Yes	Viruses;Duplodnaviria;Heunggongvirae;Uroviricota;Caudoviricetes
IMGVR_UViG_2818991443_000008	huge_phage_4687	236514	Camargo.et.al.2023	Host-associated;Plants;Roots	Plants-related	0.365784	High-quality	High-quality	Yes	/	Yes	Viruses;Duplodnaviria;Heunggongvirae;Uroviricota;Caudoviricetes
IMGVR_UViG_3300032334_001433	huge_phage_4692	202665	Camargo.et.al.2023	Environmental;Aquatic;Freshwater	Freshwater	0.36622	Complete	High-quality	Yes	/	Yes	Viruses;Duplodnaviria;Heunggongvirae;Uroviricota;Caudoviricetes
IMGVR_UViG_3300010163_000003	huge_phage_4694	218431	Camargo.et.al.2023	Host-associated;Mammals;Digestive system	Animal digestive system	0.34382	Complete	High-quality	Yes	/	Yes	Viruses;Duplodnaviria;Heunggongvirae;Uroviricota;Caudoviricetes
IMGVR_UViG_3300003322_000571	huge_phage_4695	350089	Camargo.et.al.2023	Host-associated;Plants;Roots	Plants-related	0.480569	Complete	High-quality	Yes	/	Yes	Viruses;Duplodnaviria;Heunggongvirae;Uroviricota;Caudoviricetes
IMGVR_UViG_3300046542_000227	huge_phage_4697	267320	Camargo.et.al.2023	Host-associated;Plants;Roots	Plants-related	0.522048	Complete	High-quality	Yes	/	Yes	Viruses;Duplodnaviria;Heunggongvirae;Uroviricota;Caudoviricetes
IMGVR_UViG_3300032103_000073	huge_phage_4700	267009	Camargo.et.al.2023	Environmental;Aquatic;Non-marine Saline and Alkaline	Non-marine Saline and Alkaline	0.405196	Medium-quality	Genome-fragment	Yes	/	Yes	Viruses;Duplodnaviria;Heunggongvirae;Uroviricota;Caudoviricetes
IMGVR_UViG_3300034159_000059	huge_phage_4707	209442	Camargo.et.al.2023	Environmental;Terrestrial;Soil	Soil	0.580189	Complete	High-quality	Yes	/	Yes	Viruses;Duplodnaviria;Heunggongvirae;Uroviricota;Caudoviricetes
IMGVR_UViG_3300037851_000542	huge_phage_4709	259994	Camargo.et.al.2023	Environmental;Aquatic;Thermal springs	Others	0.328923	High-quality	High-quality	Yes	/	Yes	Viruses;Duplodnaviria;Heunggongvirae;Uroviricota;Caudoviricetes
IMGVR_UViG_3300028840_006257	huge_phage_4710	213010	Camargo.et.al.2023	Environmental;Aquatic;Marine	Marine	0.653049	Low-quality	Genome-fragment	Yes	/	Yes	Viruses;Duplodnaviria;Heunggongvirae;Uroviricota;Caudoviricetes
IMGVR_UViG_3300037067_019009	huge_phage_4711	212668	Camargo.et.al.2023	Engineered;Solid waste;Landfill	Landfill	0.463582	Medium-quality	Genome-fragment	Yes	/	Yes	Viruses;Duplodnaviria;Heunggongvirae;Uroviricota;Caudoviricetes
IMGVR_UViG_3300032093_000005	huge_phage_4712	236738	Camargo.et.al.2023	Environmental;Aquatic;Freshwater	Freshwater	0.367774	High-quality	High-quality	Yes	/	Yes	Viruses;Duplodnaviria;Heunggongvirae;Uroviricota;Caudoviricetes
IMGVR_UViG_3300026290_000007	huge_phage_4713	224470	Camargo.et.al.2023	Engineered;Bioreactor;Anaerobic	Bioreactor	0.40409	Complete	High-quality	Yes	/	Yes	Viruses;Duplodnaviria;Heunggongvirae;Uroviricota;Caudoviricetes
IMGVR_UViG_3300043409_000928	huge_phage_4717	285304	Camargo.et.al.2023	Environmental;Aquatic;Freshwater	Freshwater	0.41522	Medium-quality	Genome-fragment	Yes	/	Yes	Viruses;Duplodnaviria;Heunggongvirae;Uroviricota;Caudoviricetes
IMGVR_UViG_3300020577_007233	huge_phage_4719	256820	Camargo.et.al.2023	Environmental;Aquatic;Freshwater	Freshwater	0.423865	High-quality	High-quality	Yes	/	Yes	Viruses;Duplodnaviria;Heunggongvirae;Uroviricota;Caudoviricetes
IMGVR_UViG_3300008116_000005	huge_phage_4721	212336	Camargo.et.al.2023	Environmental;Aquatic;Freshwater	Freshwater	0.357655	Medium-quality	Genome-fragment	Yes	/	Yes	Viruses;Duplodnaviria;Heunggongvirae;Uroviricota;Caudoviricetes
IMGVR_UViG_3300021387_000118	huge_phage_4723	205167	Camargo.et.al.2023	Host-associated;Mammals;Digestive system	Animal digestive system	0.357787	Complete	High-quality	Yes	/	Yes	Viruses;Duplodnaviria;Heunggongvirae;Uroviricota;Caudoviricetes
IMGVR_UViG_3300025693_000001	huge_phage_4725	324905	Camargo.et.al.2023	Environmental;Aquatic;Marine	Marine	0.407978	Complete	High-quality	Yes	/	Yes	Viruses;Duplodnaviria;Heunggongvirae;Uroviricota;Caudoviricetes
IMGVR_UViG_3300027747_002427	huge_phage_4726	202941	Camargo.et.al.2023	Environmental;Aquatic;Freshwater	Freshwater	0.33254	High-quality	High-quality	Yes	/	Yes	Viruses;Duplodnaviria;Heunggongvirae;Uroviricota;Caudoviricetes
IMGVR_UViG_2834277561_000001	huge_phage_4727	201430	Camargo.et.al.2023	Host-associated;Human;Digestive system	Animal digestive system	0.332354	High-quality	High-quality	Yes	/	Yes	Viruses;Duplodnaviria;Heunggongvirae;Uroviricota;Caudoviricetes
IMGVR_UViG_3300028833_000055	huge_phage_4736	363334	Camargo.et.al.2023	Host-associated;Mammals;Digestive system	Animal digestive system	0.401427	Medium-quality	Genome-fragment	Yes	/	Yes	Viruses;Duplodnaviria;Heunggongvirae;Uroviricota;Caudoviricetes
IMGVR_UViG_3300044796_000394	huge_phage_4741	614480	Camargo.et.al.2023	Environmental;Terrestrial;Soil	Soil	0.427065	High-quality	High-quality	Yes	/	Yes	Viruses;Duplodnaviria;Heunggongvirae;Uroviricota;Caudoviricetes
IMGVR_UViG_3300043773_002020	huge_phage_4745	284095	Camargo.et.al.2023	Environmental;Aquatic;Freshwater	Freshwater	0.465482	Complete	High-quality	Yes	/	Yes	Viruses;Duplodnaviria;Heunggongvirae;Uroviricota;Caudoviricetes
IMGVR_UViG_3300024999_000029	huge_phage_4747	349050	Camargo.et.al.2023	Environmental;Aquatic;Deep subsurface	Deep subsurface	0.288592	High-quality	High-quality	Yes	/	Yes	Viruses;Duplodnaviria;Heunggongvirae;Uroviricota;Caudoviricetes
IMGVR_UViG_3300014497_000001	huge_phage_4750	229240	Camargo.et.al.2023	Host-associated;Plants;Roots	Plants-related	0.502321	Complete	High-quality	Yes	/	Yes	Viruses;Duplodnaviria;Heunggongvirae;Uroviricota;Caudoviricetes
IMGVR_UViG_3300045988_180705	huge_phage_1514	304928	Camargo.et.al.2023	Host-associated;Mammals: Human;Digestive system	Animal digestive system	0.298766	Medium-quality	Genome-fragment	Yes	/	Yes	Viruses;Duplodnaviria;Heunggongvirae;Uroviricota;Caudoviricetes
IMGVR_UViG_3300035208_001992	huge_phage_4755	305891	Camargo.et.al.2023	Engineered;Solid waste;Landfill	Landfill	0.501597	High-quality	High-quality	Yes	/	Yes	Viruses;Duplodnaviria;Heunggongvirae;Uroviricota;Caudoviricetes
IMGVR_UViG_3300026302_000005	huge_phage_4757	375937	Camargo.et.al.2023	Engineered;Bioreactor;EBPR (Enhanced biological phosphorus removal)	Bioreactor	0.534103	High-quality	High-quality	Yes	/	Yes	Viruses;Duplodnaviria;Heunggongvirae;Uroviricota;Caudoviricetes
IMGVR_UViG_3300046167_000798	huge_phage_4759	278889	Camargo.et.al.2023	Environmental;Aquatic;Marine	Marine	0.305258	High-quality	High-quality	Yes	/	Yes	Viruses;Duplodnaviria;Heunggongvirae;Uroviricota;Caudoviricetes
IMGVR_UViG_3300008159_000002	huge_phage_4761	208225	Camargo.et.al.2023	Host-associated;Human;Digestive system	Animal digestive system	0.292943	Complete	High-quality	Yes	/	Yes	Viruses;Duplodnaviria;Heunggongvirae;Uroviricota;Caudoviricetes
IMGVR_UViG_3300002307_000018	huge_phage_4772	264637	Camargo.et.al.2023	Environmental;Aquatic;Freshwater	Freshwater	0.417411	Medium-quality	Genome-fragment	Yes	/	Yes	Viruses;Duplodnaviria;Heunggongvirae;Uroviricota;Caudoviricetes
IMGVR_UViG_3300007316_000002	huge_phage_4773	281388	Camargo.et.al.2023	Host-associated;Human;Digestive system	Animal digestive system	0.317594	High-quality	High-quality	Yes	/	Yes	Viruses;Duplodnaviria;Heunggongvirae;Uroviricota;Caudoviricetes
IMGVR_UViG_3300008406_000009	huge_phage_4779	243267	Camargo.et.al.2023	Host-associated;Human;Digestive system	Animal digestive system	0.363839	High-quality	High-quality	Yes	/	Yes	Viruses;Duplodnaviria;Heunggongvirae;Uroviricota;Caudoviricetes
IMGVR_UViG_3300028591_000072	huge_phage_4784	302581	Camargo.et.al.2023	Host-associated;Mammals;Digestive system	Animal digestive system	0.322096	Medium-quality	Genome-fragment	Yes	/	Yes	Viruses;Duplodnaviria;Heunggongvirae;Uroviricota;Caudoviricetes
IMGVR_UViG_3300050821_001527	huge_phage_4785	202882	Camargo.et.al.2023	Environmental;Terrestrial;Soil	Soil	0.493923	High-quality	High-quality	Yes	/	Yes	Viruses;Duplodnaviria;Heunggongvirae;Uroviricota;Caudoviricetes
IMGVR_UViG_3300027269_000160	huge_phage_4786	314224	Camargo.et.al.2023	Environmental;Terrestrial;Soil	Soil	0.520581	Complete	High-quality	Yes	/	Yes	Viruses;Duplodnaviria;Heunggongvirae;Uroviricota;Caudoviricetes
IMGVR_UViG_3300013212_000088	huge_phage_4787	261424	Camargo.et.al.2023	Environmental;Aquatic;Freshwater	Freshwater	0.335593	High-quality	High-quality	Yes	/	Yes	Viruses;Duplodnaviria;Heunggongvirae;Uroviricota;Caudoviricetes
IMGVR_UViG_3300043446_005562	huge_phage_4790	252618	Camargo.et.al.2023	Environmental;Aquatic;Freshwater	Freshwater	0.409808	Medium-quality	Genome-fragment	Yes	/	Yes	Viruses;Duplodnaviria;Heunggongvirae;Uroviricota;Caudoviricetes
IMGVR_UViG_3300024329_001006	huge_phage_4795	210912	Camargo.et.al.2023	Environmental;Aquatic;Marine	Marine	0.307697	Low-quality	Genome-fragment	Yes	/	Yes	Viruses;Duplodnaviria;Heunggongvirae;Uroviricota;Caudoviricetes
IMGVR_UViG_3300028048_001169	huge_phage_4797	225070	Camargo.et.al.2023	Host-associated;Mammals;Digestive system	Animal digestive system	0.331457	High-quality	High-quality	Yes	/	Yes	Viruses;Duplodnaviria;Heunggongvirae;Uroviricota;Caudoviricetes
IMGVR_UViG_3300028833_000001	huge_phage_4798	361445	Camargo.et.al.2023	Host-associated;Mammals;Digestive system	Animal digestive system	0.335725	High-quality	High-quality	Yes	/	Yes	Viruses;Duplodnaviria;Heunggongvirae;Uroviricota;Caudoviricetes
IMGVR_UViG_3300031759_000002	huge_phage_4799	353880	Camargo.et.al.2023	Environmental;Aquatic;Freshwater	Freshwater	0.304767	High-quality	High-quality	Yes	/	Yes	Viruses;Duplodnaviria;Heunggongvirae;Uroviricota;Caudoviricetes
IMGVR_UViG_3300029286_000011	huge_phage_4800	207231	Camargo.et.al.2023	Environmental;Aquatic;Freshwater	Freshwater	0.530012	High-quality	High-quality	Yes	/	Yes	Viruses;Duplodnaviria;Heunggongvirae;Uroviricota;Caudoviricetes
IMGVR_UViG_3300022555_000004	huge_phage_4803	217848	Camargo.et.al.2023	Environmental;Aquatic;Freshwater	Freshwater	0.327081	High-quality	High-quality	Yes	/	Yes	Viruses;Duplodnaviria;Heunggongvirae;Uroviricota;Caudoviricetes
IMGVR_UViG_3300022602_000025	huge_phage_4808	284478	Camargo.et.al.2023	Environmental;Aquatic;Freshwater	Freshwater	0.396639	Medium-quality	Genome-fragment	Yes	/	Yes	Viruses;Duplodnaviria;Heunggongvirae;Uroviricota;Caudoviricetes
IMGVR_UViG_3300029288_000066	huge_phage_4809	228886	Camargo.et.al.2023	Engineered;Solid waste;Landfill	Landfill	0.32805	Medium-quality	Genome-fragment	Yes	/	Yes	Viruses;Duplodnaviria;Heunggongvirae;Uroviricota;Caudoviricetes
IMGVR_UViG_3300039008_000120	huge_phage_4810	232818	Camargo.et.al.2023	Host-associated;Invertebrates;Cnidaria	Others	0.261771	Complete	High-quality	Yes	/	Yes	Viruses;Duplodnaviria;Heunggongvirae;Uroviricota;Caudoviricetes
IMGVR_UViG_3300020473_000011	huge_phage_4819	281557	Camargo.et.al.2023	Environmental;Aquatic;Marine	Marine	0.477083	Medium-quality	Genome-fragment	Yes	/	Yes	Viruses;Duplodnaviria;Heunggongvirae;Uroviricota;Caudoviricetes
IMGVR_UViG_3300021431_004083	huge_phage_4826	251549	Camargo.et.al.2023	Host-associated;Mammals;Digestive system	Animal digestive system	0.429256	Complete	High-quality	Yes	/	Yes	Viruses;Duplodnaviria;Heunggongvirae;Uroviricota;Caudoviricetes
IMGVR_UViG_3300037454_000941	huge_phage_4828	223861	Camargo.et.al.2023	Host-associated;Mammals;Digestive system	Animal digestive system	0.517133	Medium-quality	Genome-fragment	Yes	/	Yes	Viruses;Duplodnaviria;Heunggongvirae;Uroviricota;Caudoviricetes
IMGVR_UViG_3300030202_003189	huge_phage_4829	231285	Camargo.et.al.2023	Environmental;Aquatic;Marine	Marine	0.343306	Medium-quality	Genome-fragment	Yes	/	Yes	Viruses;Duplodnaviria;Heunggongvirae;Uroviricota;Caudoviricetes
IMGVR_UViG_3300009709_000001	huge_phage_4831	385394	Camargo.et.al.2023	Host-associated;Plants;Peat moss	Plants-related	0.432635	Complete	High-quality	Yes	/	Yes	Viruses;Duplodnaviria;Heunggongvirae;Uroviricota;Caudoviricetes
IMGVR_UViG_3300008522_000001	huge_phage_4832	249734	Camargo.et.al.2023	Host-associated;Human;Digestive system	Animal digestive system	0.29304	Complete	High-quality	Yes	/	Yes	Viruses;Duplodnaviria;Heunggongvirae;Uroviricota;Caudoviricetes
IMGVR_UViG_3300002834_000024	huge_phage_4833	274786	Camargo.et.al.2023	Host-associated;Arthropoda: Insects;Digestive system	Animal digestive system	0.290273	Medium-quality	Genome-fragment	Yes	/	Yes	Viruses;Duplodnaviria;Heunggongvirae;Uroviricota;Caudoviricetes
IMGVR_UViG_3300006564_000004	huge_phage_4834	243315	Camargo.et.al.2023	Host-associated;Human;Digestive system	Animal digestive system	0.308666	High-quality	High-quality	Yes	/	Yes	Viruses;Duplodnaviria;Heunggongvirae;Uroviricota;Caudoviricetes
IMGVR_UViG_3300023174_000040	huge_phage_4835	323267	Camargo.et.al.2023	Environmental;Aquatic;Freshwater	Freshwater	0.357673	High-quality	High-quality	Yes	/	Yes	Viruses;Duplodnaviria;Heunggongvirae;Uroviricota;Caudoviricetes
IMGVR_UViG_3300028797_000098	huge_phage_4836	203111	Camargo.et.al.2023	Host-associated;Mammals;Digestive system	Animal digestive system	0.4841	Low-quality	Genome-fragment	Yes	/	Yes	Viruses;Duplodnaviria;Heunggongvirae;Uroviricota;Caudoviricetes
IMGVR_UViG_3300008107_000020	huge_phage_4839	216700	Camargo.et.al.2023	Environmental;Aquatic;Freshwater	Freshwater	0.342487	Medium-quality	Genome-fragment	Yes	/	Yes	Viruses;Duplodnaviria;Heunggongvirae;Uroviricota;Caudoviricetes
IMGVR_UViG_3300003890_000171	huge_phage_4840	448907	Camargo.et.al.2023	Environmental;Aquatic;Thermal springs	Others	0.405186	High-quality	High-quality	Yes	/	Yes	Viruses;Duplodnaviria;Heunggongvirae;Uroviricota;Caudoviricetes
IMGVR_UViG_3300006259_000192	huge_phage_4848	252744	Camargo.et.al.2023	Host-associated;Human;Digestive system	Animal digestive system	0.595092	High-quality	High-quality	Yes	/	Yes	Viruses;Duplodnaviria;Heunggongvirae;Uroviricota;Caudoviricetes
IMGVR_UViG_3300032373_000001	huge_phage_4849	270829	Camargo.et.al.2023	Environmental;Aquatic;Marine	Marine	0.621879	Medium-quality	Genome-fragment	Yes	/	Yes	Viruses;Duplodnaviria;Heunggongvirae;Uroviricota;Caudoviricetes
IMGVR_UViG_3300031857_000007	huge_phage_4853	248608	Camargo.et.al.2023	Environmental;Aquatic;Freshwater	Freshwater	0.358665	High-quality	High-quality	Yes	/	Yes	Viruses;Duplodnaviria;Heunggongvirae;Uroviricota;Caudoviricetes
IMGVR_UViG_3300042013_000065	huge_phage_4854	312503	Camargo.et.al.2023	Host-associated;Plants;Roots	Plants-related	0.487167	High-quality	High-quality	Yes	/	Yes	Viruses;Duplodnaviria;Heunggongvirae;Uroviricota;Caudoviricetes
IMGVR_UViG_3300017991_000001	huge_phage_4856	211084	Camargo.et.al.2023	Environmental;Aquatic;Non-marine Saline and Alkaline	Non-marine Saline and Alkaline	0.627385	Complete	High-quality	Yes	/	Yes	Viruses;Duplodnaviria;Heunggongvirae;Uroviricota;Caudoviricetes
IMGVR_UViG_3300038443_002533	huge_phage_4858	272470	Camargo.et.al.2023	Host-associated;Plants;Roots	Plants-related	0.548002	Complete	High-quality	Yes	/	Yes	Viruses;Duplodnaviria;Heunggongvirae;Uroviricota;Caudoviricetes
IMGVR_UViG_3300042541_001760	huge_phage_4869	261052	Camargo.et.al.2023	Environmental;Aquatic;Freshwater	Freshwater	0.323836	Medium-quality	Genome-fragment	Yes	/	Yes	Viruses;Duplodnaviria;Heunggongvirae;Uroviricota;Caudoviricetes
IMGVR_UViG_3300028175_000001	huge_phage_4874	204426	Camargo.et.al.2023	Environmental;Aquatic;Marine	Marine	0.317538	High-quality	High-quality	Yes	/	Yes	Viruses;Duplodnaviria;Heunggongvirae;Uroviricota;Caudoviricetes
IMGVR_UViG_3300034101_006325	huge_phage_4882	200303	Camargo.et.al.2023	Environmental;Aquatic;Freshwater	Freshwater	0.394687	Medium-quality	Genome-fragment	Yes	/	Yes	Viruses;Duplodnaviria;Heunggongvirae;Uroviricota;Caudoviricetes
IMGVR_UViG_3300042154_004306	huge_phage_4885	270359	Camargo.et.al.2023	Environmental;Aquatic;Freshwater	Freshwater	0.387973	Medium-quality	Genome-fragment	Yes	/	Yes	Viruses;Duplodnaviria;Heunggongvirae;Uroviricota;Caudoviricetes
IMGVR_UViG_3300028909_000001	huge_phage_4892	218290	Camargo.et.al.2023	Environmental;Terrestrial;Soil	Soil	0.34811	Complete	High-quality	Yes	/	Yes	Viruses;Duplodnaviria;Heunggongvirae;Uroviricota;Caudoviricetes
IMGVR_UViG_3300045988_181267	huge_phage_6166	291943	Camargo.et.al.2023	Host-associated;Mammals: Human;Digestive system	Animal digestive system	0.297644	Medium-quality	Genome-fragment	Yes	/	Yes	Viruses;Duplodnaviria;Heunggongvirae;Uroviricota;Caudoviricetes
IMGVR_UViG_3300021399_000096	huge_phage_4897	484576	Camargo.et.al.2023	Host-associated;Mammals;Digestive system	Animal digestive system	0.28215	Medium-quality	Genome-fragment	Yes	/	Yes	Viruses;Duplodnaviria;Heunggongvirae;Uroviricota;Caudoviricetes
IMGVR_UViG_3300027816_000051	huge_phage_4908	288260	Camargo.et.al.2023	Environmental;Aquatic;Freshwater	Freshwater	0.334743	Medium-quality	Genome-fragment	Yes	/	Yes	Viruses;Duplodnaviria;Heunggongvirae;Uroviricota;Caudoviricetes
IMGVR_UViG_3300045988_115074	huge_phage_4909	237302	Camargo.et.al.2023	Host-associated;Mammals: Human;Digestive system	Animal digestive system	0.336997	Complete	High-quality	Yes	/	Yes	Viruses;Duplodnaviria;Heunggongvirae;Uroviricota;Caudoviricetes
IMGVR_UViG_3300025715_000009	huge_phage_4915	388268	Camargo.et.al.2023	Engineered;Bioreactor;Anaerobic	Bioreactor	0.297122	High-quality	High-quality	Yes	/	Yes	Viruses;Duplodnaviria;Heunggongvirae;Uroviricota;Caudoviricetes
IMGVR_UViG_3300032516_000001	huge_phage_4917	241648	Camargo.et.al.2023	Environmental;Aquatic;Freshwater	Freshwater	0.42336	Medium-quality	Genome-fragment	Yes	/	Yes	Viruses;Duplodnaviria;Heunggongvirae;Uroviricota;Caudoviricetes
IMGVR_UViG_3300014203_000001	huge_phage_4926	245713	Camargo.et.al.2023	Environmental;Aquatic;Deep subsurface	Deep subsurface	0.321399	Complete	High-quality	Yes	/	Yes	Viruses;Duplodnaviria;Heunggongvirae;Uroviricota;Caudoviricetes
IMGVR_UViG_2907128583_000005	huge_phage_4929	218271	Camargo.et.al.2023	Unknown	Unknown	0.357079	High-quality	High-quality	Yes	/	Yes	Viruses;Duplodnaviria;Heunggongvirae;Uroviricota;Caudoviricetes
IMGVR_UViG_3300046513_000221	huge_phage_4934	263413	Camargo.et.al.2023	Host-associated;Plants;Roots	Plants-related	0.552072	Complete	High-quality	Yes	/	Yes	Viruses;Duplodnaviria;Heunggongvirae;Uroviricota;Caudoviricetes
IMGVR_UViG_3300027374_000001	huge_phage_4941	227988	Camargo.et.al.2023	Host-associated;Mammals;Digestive system	Animal digestive system	0.332627	High-quality	High-quality	Yes	/	Yes	Viruses;Duplodnaviria;Heunggongvirae;Uroviricota;Caudoviricetes
IMGVR_UViG_3300028805_000043	huge_phage_4942	202287	Camargo.et.al.2023	Host-associated;Mammals;Digestive system	Animal digestive system	0.267516	Medium-quality	Genome-fragment	Yes	/	Yes	Viruses;Duplodnaviria;Heunggongvirae;Uroviricota;Caudoviricetes
IMGVR_UViG_3300042308_001511	huge_phage_4945	344083	Camargo.et.al.2023	Environmental;Aquatic;Freshwater	Freshwater	0.366284	High-quality	High-quality	Yes	/	Yes	Viruses;Duplodnaviria;Heunggongvirae;Uroviricota;Caudoviricetes
IMGVR_UViG_3300010882_000009	huge_phage_4947	225398	Camargo.et.al.2023	Host-associated;Arthropoda: Insects;Digestive system	Animal digestive system	0.305145	High-quality	High-quality	Yes	/	Yes	Viruses;Duplodnaviria;Heunggongvirae;Uroviricota;Caudoviricetes
IMGVR_UViG_3300037110_000087	huge_phage_4951	307124	Camargo.et.al.2023	Environmental;Terrestrial;Soil	Soil	0.451417	High-quality	High-quality	Yes	/	Yes	Viruses;Duplodnaviria;Heunggongvirae;Uroviricota;Caudoviricetes
IMGVR_UViG_3300007789_000002	huge_phage_4953	217459	Camargo.et.al.2023	Host-associated;Human;Digestive system	Animal digestive system	0.394226	Medium-quality	Genome-fragment	Yes	/	Yes	Viruses;Duplodnaviria;Heunggongvirae;Uroviricota;Caudoviricetes
IMGVR_UViG_3300007513_000003	huge_phage_4955	224057	Camargo.et.al.2023	Environmental;Aquatic;Marine	Marine	0.362537	Medium-quality	Genome-fragment	Yes	/	Yes	Viruses;Duplodnaviria;Heunggongvirae;Uroviricota;Caudoviricetes
IMGVR_UViG_3300033146_002768	huge_phage_4959	207111	Camargo.et.al.2023	Environmental;Aquatic;Marine	Marine	0.291911	Medium-quality	Genome-fragment	Yes	/	Yes	Viruses;Duplodnaviria;Heunggongvirae;Uroviricota;Caudoviricetes
IMGVR_UViG_3300031992_000007	huge_phage_4963	265480	Camargo.et.al.2023	Host-associated;Mammals;Digestive system	Animal digestive system	0.476254	High-quality	High-quality	Yes	/	Yes	Viruses;Duplodnaviria;Heunggongvirae;Uroviricota;Caudoviricetes
IMGVR_UViG_3300033463_000003	huge_phage_4980	273303	Camargo.et.al.2023	Host-associated;Mammals;Digestive system	Animal digestive system	0.320417	High-quality	High-quality	Yes	/	Yes	Viruses;Duplodnaviria;Heunggongvirae;Uroviricota;Caudoviricetes
IMGVR_UViG_3300017705_000602	huge_phage_4981	319623	Camargo.et.al.2023	Environmental;Aquatic;Marine	Marine	0.413365	Complete	High-quality	Yes	/	Yes	Viruses;Duplodnaviria;Heunggongvirae;Uroviricota;Caudoviricetes
IMGVR_UViG_3300009545_000018	huge_phage_4983	447763	Camargo.et.al.2023	Host-associated;Plants;Roots	Plants-related	0.309822	High-quality	High-quality	Yes	/	Yes	Viruses;Duplodnaviria;Heunggongvirae;Uroviricota;Caudoviricetes
IMGVR_UViG_3300028591_000073	huge_phage_4984	294548	Camargo.et.al.2023	Host-associated;Mammals;Digestive system	Animal digestive system	0.37565	High-quality	High-quality	Yes	/	Yes	Viruses;Duplodnaviria;Heunggongvirae;Uroviricota;Caudoviricetes
IMGVR_UViG_3300042891_000711	huge_phage_4989	218902	Camargo.et.al.2023	Environmental;Aquatic;Freshwater	Freshwater	0.382221	Medium-quality	Genome-fragment	Yes	/	Yes	Viruses;Duplodnaviria;Heunggongvirae;Uroviricota;Caudoviricetes
IMGVR_UViG_2799112330_000002	huge_phage_4992	410106	Camargo.et.al.2023	Host-associated;Mammals;Digestive system	Animal digestive system	0.292451	High-quality	High-quality	Yes	/	Yes	Viruses;Duplodnaviria;Heunggongvirae;Uroviricota;Caudoviricetes
IMGVR_UViG_3300042356_001602	huge_phage_4994	219397	Camargo.et.al.2023	Environmental;Aquatic;Freshwater	Freshwater	0.371441	High-quality	High-quality	Yes	/	Yes	Viruses;Duplodnaviria;Heunggongvirae;Uroviricota;Caudoviricetes
IMGVR_UViG_3300042518_001298	huge_phage_4998	211622	Camargo.et.al.2023	Environmental;Aquatic;Freshwater	Freshwater	0.32009	Complete	High-quality	Yes	/	Yes	Viruses;Duplodnaviria;Heunggongvirae;Uroviricota;Caudoviricetes
IMGVR_UViG_3300027782_000027	huge_phage_5004	240759	Camargo.et.al.2023	Environmental;Aquatic;Freshwater	Freshwater	0.319876	Medium-quality	Genome-fragment	Yes	/	Yes	Viruses;Duplodnaviria;Heunggongvirae;Uroviricota;Caudoviricetes
IMGVR_UViG_3300046167_000825	huge_phage_5006	289014	Camargo.et.al.2023	Environmental;Aquatic;Marine	Marine	0.446535	Medium-quality	Genome-fragment	Yes	/	Yes	Viruses;Duplodnaviria;Heunggongvirae;Uroviricota;Caudoviricetes
IMGVR_UViG_3300030616_000016	huge_phage_5011	231647	Camargo.et.al.2023	Environmental;Aquatic;Marine	Marine	0.380553	High-quality	High-quality	Yes	/	Yes	Viruses;Duplodnaviria;Heunggongvirae;Uroviricota;Caudoviricetes
IMGVR_UViG_3300045996_002451	huge_phage_5013	211171	Camargo.et.al.2023	Environmental;Terrestrial;Soil	Soil	0.587571	High-quality	High-quality	Yes	/	Yes	Viruses;Duplodnaviria;Heunggongvirae;Uroviricota;Caudoviricetes
IMGVR_UViG_3300049855_000348	huge_phage_5014	220489	Camargo.et.al.2023	Environmental;Aquatic;Freshwater	Freshwater	0.560658	Complete	High-quality	Yes	/	Yes	Viruses;Duplodnaviria;Heunggongvirae;Uroviricota;Caudoviricetes
IMGVR_UViG_3300023235_000008	huge_phage_5016	230059	Camargo.et.al.2023	Environmental;Aquatic;Non-marine Saline and Alkaline	Non-marine Saline and Alkaline	0.397898	Medium-quality	Genome-fragment	Yes	/	Yes	Viruses;Duplodnaviria;Heunggongvirae;Uroviricota;Caudoviricetes
IMGVR_UViG_3300029288_000059	huge_phage_5026	289811	Camargo.et.al.2023	Engineered;Solid waste;Landfill	Landfill	0.314305	Medium-quality	Genome-fragment	Yes	/	Yes	Viruses;Duplodnaviria;Heunggongvirae;Uroviricota;Caudoviricetes
IMGVR_UViG_3300045988_164638	huge_phage_5029	216488	Camargo.et.al.2023	Host-associated;Mammals: Human;Digestive system	Animal digestive system	0.345525	High-quality	High-quality	Yes	/	Yes	Viruses;Duplodnaviria;Heunggongvirae;Uroviricota;Caudoviricetes
IMGVR_UViG_3300047551_002158	huge_phage_5032	224072	Camargo.et.al.2023	Environmental;Aquatic;Freshwater	Freshwater	0.364137	High-quality	High-quality	Yes	/	Yes	Viruses;Duplodnaviria;Heunggongvirae;Uroviricota;Caudoviricetes
IMGVR_UViG_3300029305_005724	huge_phage_5039	223865	Camargo.et.al.2023	Host-associated;Mammals;Digestive system	Animal digestive system	0.346463	High-quality	High-quality	Yes	/	Yes	Viruses;Duplodnaviria;Heunggongvirae;Uroviricota;Caudoviricetes
IMGVR_UViG_3300029245_000001	huge_phage_5043	262289	Camargo.et.al.2023	Host-associated;Human;Digestive system	Animal digestive system	0.415126	High-quality	High-quality	Yes	/	Yes	Viruses;Duplodnaviria;Heunggongvirae;Uroviricota;Caudoviricetes
IMGVR_UViG_3300033074_000580	huge_phage_5046	323865	Camargo.et.al.2023	Engineered;WWTP;Wastewater	WWTP	0.323446	High-quality	High-quality	Yes	/	Yes	Viruses;Duplodnaviria;Heunggongvirae;Uroviricota;Caudoviricetes
IMGVR_UViG_3300008305_000002	huge_phage_5049	254378	Camargo.et.al.2023	Host-associated;Human;Digestive system	Animal digestive system	0.330284	High-quality	High-quality	Yes	/	Yes	Viruses;Duplodnaviria;Heunggongvirae;Uroviricota;Caudoviricetes
IMGVR_UViG_3300022868_000009	huge_phage_5051	344634	Camargo.et.al.2023	Environmental;Aquatic;Non-marine Saline and Alkaline	Non-marine Saline and Alkaline	0.252825	Medium-quality	Genome-fragment	Yes	/	Yes	Viruses;Duplodnaviria;Heunggongvirae;Uroviricota;Caudoviricetes
IMGVR_UViG_3300011116_001227	huge_phage_5053	210040	Camargo.et.al.2023	Environmental;Aquatic;Freshwater	Freshwater	0.39242	Medium-quality	Genome-fragment	Yes	/	Yes	Viruses;Duplodnaviria;Heunggongvirae;Uroviricota;Caudoviricetes
IMGVR_UViG_3300038803_000201	huge_phage_5055	238814	Camargo.et.al.2023	Engineered;WWTP;Nutrient removal	WWTP	0.406986	High-quality	High-quality	Yes	/	Yes	Viruses;Duplodnaviria;Heunggongvirae;Uroviricota;Caudoviricetes
IMGVR_UViG_3300031251_000001	huge_phage_5058	214229	Camargo.et.al.2023	Host-associated;Plants;Roots	Plants-related	0.57573	High-quality	High-quality	Yes	/	Yes	Viruses;Duplodnaviria;Heunggongvirae;Uroviricota;Caudoviricetes
IMGVR_UViG_3300045015_000053	huge_phage_5063	475914	Camargo.et.al.2023	Environmental;Aquatic;Freshwater	Freshwater	0.55747	High-quality	High-quality	Yes	/	Yes	Viruses;Duplodnaviria;Heunggongvirae;Uroviricota;Caudoviricetes
IMGVR_UViG_3300022602_000027	huge_phage_5066	216673	Camargo.et.al.2023	Environmental;Aquatic;Freshwater	Freshwater	0.380467	Medium-quality	Genome-fragment	Yes	/	Yes	Viruses;Duplodnaviria;Heunggongvirae;Uroviricota;Caudoviricetes
IMGVR_UViG_2710264778_000001	huge_phage_5067	229129	Camargo.et.al.2023	Engineered;Bioreactor;Unclassified	Bioreactor	0.257689	High-quality	High-quality	Yes	/	Yes	Viruses;Duplodnaviria;Heunggongvirae;Uroviricota;Caudoviricetes
IMGVR_UViG_3300025018_000001	huge_phage_5068	264175	Camargo.et.al.2023	Environmental;Aquatic;Deep subsurface	Deep subsurface	0.355223	Complete	High-quality	Yes	/	Yes	Viruses;Duplodnaviria;Heunggongvirae;Uroviricota;Caudoviricetes
IMGVR_UViG_3300034073_003542	huge_phage_5073	209847	Camargo.et.al.2023	Environmental;Aquatic;Deep subsurface	Deep subsurface	0.353634	High-quality	High-quality	Yes	/	Yes	Viruses;Duplodnaviria;Heunggongvirae;Uroviricota;Caudoviricetes
IMGVR_UViG_3300037692_000137	huge_phage_5074	234228	Camargo.et.al.2023	Environmental;Aquatic;Floodplain	Others	0.378755	Medium-quality	Genome-fragment	Yes	/	Yes	Viruses;Duplodnaviria;Heunggongvirae;Uroviricota;Caudoviricetes
IMGVR_UViG_3300044620_001883	huge_phage_5084	200255	Camargo.et.al.2023	Environmental;Aquatic;Freshwater	Freshwater	0.578892	High-quality	High-quality	Yes	/	Yes	Viruses;Duplodnaviria;Heunggongvirae;Uroviricota;Caudoviricetes
IMGVR_UViG_3300025547_000002	huge_phage_5085	371872	Camargo.et.al.2023	Environmental;Aquatic;Marine	Marine	0.442862	Low-quality	Genome-fragment	Yes	/	Yes	Viruses;Duplodnaviria;Heunggongvirae;Uroviricota;Caudoviricetes
IMGVR_UViG_3300043411_000921	huge_phage_5087	241399	Camargo.et.al.2023	Environmental;Aquatic;Freshwater	Freshwater	0.457289	Medium-quality	Genome-fragment	Yes	/	Yes	Viruses;Duplodnaviria;Heunggongvirae;Uroviricota;Caudoviricetes
IMGVR_UViG_3300013713_000001	huge_phage_5094	229109	Camargo.et.al.2023	Engineered;Built environment;City	Built environment	0.522555	High-quality	High-quality	Yes	/	Yes	Viruses;Duplodnaviria;Heunggongvirae;Uroviricota;Caudoviricetes
IMGVR_UViG_3300042888_002988	huge_phage_5098	200158	Camargo.et.al.2023	Environmental;Aquatic;Freshwater	Freshwater	0.605951	High-quality	High-quality	Yes	/	Yes	Viruses;Duplodnaviria;Heunggongvirae;Uroviricota;Caudoviricetes
IMGVR_UViG_3300034025_000120	huge_phage_5105	224429	Camargo.et.al.2023	Environmental;Terrestrial;Soil	Soil	0.524616	Complete	High-quality	Yes	/	Yes	Viruses;Duplodnaviria;Heunggongvirae;Uroviricota;Caudoviricetes
IMGVR_UViG_3300008732_000001	huge_phage_5106	229378	Camargo.et.al.2023	Host-associated;Human;Digestive system	Animal digestive system	0.31224	Complete	High-quality	Yes	/	Yes	Viruses;Duplodnaviria;Heunggongvirae;Uroviricota;Caudoviricetes
IMGVR_UViG_3300042885_000900	huge_phage_5108	312799	Camargo.et.al.2023	Environmental;Aquatic;Freshwater	Freshwater	0.310071	High-quality	High-quality	Yes	/	Yes	Viruses;Duplodnaviria;Heunggongvirae;Uroviricota;Caudoviricetes
IMGVR_UViG_3300028591_000079	huge_phage_5111	231064	Camargo.et.al.2023	Host-associated;Mammals;Digestive system	Animal digestive system	0.322309	High-quality	High-quality	Yes	/	Yes	Viruses;Duplodnaviria;Heunggongvirae;Uroviricota;Caudoviricetes
IMGVR_UViG_3300033273_000282	huge_phage_5115	200309	Camargo.et.al.2023	Environmental;Aquatic;Marine	Marine	0.436471	High-quality	High-quality	Yes	/	Yes	Viruses;Duplodnaviria;Heunggongvirae;Uroviricota;Caudoviricetes
IMGVR_UViG_3300034053_000029	huge_phage_5119	210171	Camargo.et.al.2023	Environmental;Aquatic;Freshwater	Freshwater	0.384187	Complete	High-quality	Yes	/	Yes	Viruses;Duplodnaviria;Heunggongvirae;Uroviricota;Caudoviricetes
IMGVR_UViG_3300019757_000001	huge_phage_5120	239651	Camargo.et.al.2023	Environmental;Aquatic;Freshwater	Freshwater	0.351666	High-quality	High-quality	Yes	/	Yes	Viruses;Duplodnaviria;Heunggongvirae;Uroviricota;Caudoviricetes
IMGVR_UViG_3300031813_000003	huge_phage_5123	215974	Camargo.et.al.2023	Environmental;Aquatic;Freshwater	Freshwater	0.342676	High-quality	High-quality	Yes	/	Yes	Viruses;Duplodnaviria;Heunggongvirae;Uroviricota;Caudoviricetes
IMGVR_UViG_3300032335_000499	huge_phage_5130	323926	Camargo.et.al.2023	Environmental;Aquatic;Freshwater	Freshwater	0.409328	Medium-quality	Genome-fragment	Yes	/	Yes	Viruses;Duplodnaviria;Heunggongvirae;Uroviricota;Caudoviricetes
IMGVR_UViG_3300007352_000001	huge_phage_5133	241426	Camargo.et.al.2023	Environmental;Terrestrial;Deep subsurface	Deep subsurface	0.650522	Complete	High-quality	Yes	/	Yes	Viruses;Duplodnaviria;Heunggongvirae;Uroviricota;Caudoviricetes
IMGVR_UViG_3300021475_000005	huge_phage_5138	203046	Camargo.et.al.2023	Environmental;Terrestrial;Soil	Soil	0.502359	Medium-quality	Genome-fragment	Yes	/	Yes	Viruses;Duplodnaviria;Heunggongvirae;Uroviricota;Caudoviricetes
IMGVR_UViG_3300031997_000001	huge_phage_5147	235458	Camargo.et.al.2023	Environmental;Aquatic;Freshwater	Freshwater	0.573835	High-quality	High-quality	Yes	/	Yes	Viruses;Duplodnaviria;Heunggongvirae;Uroviricota;Caudoviricetes
IMGVR_UViG_3300021514_000002	huge_phage_5148	363531	Camargo.et.al.2023	Environmental;Aquatic;Marine	Marine	0.359744	High-quality	High-quality	Yes	/	Yes	Viruses;Duplodnaviria;Heunggongvirae;Uroviricota;Caudoviricetes
IMGVR_UViG_3300049048_000052	huge_phage_5149	251780	Camargo.et.al.2023	Environmental;Terrestrial;Soil	Soil	0.425514	High-quality	High-quality	Yes	/	Yes	Viruses;Duplodnaviria;Heunggongvirae;Uroviricota;Caudoviricetes
IMGVR_UViG_3300031994_000006	huge_phage_5156	207794	Camargo.et.al.2023	Host-associated;Mammals;Digestive system	Animal digestive system	0.54374	Medium-quality	Genome-fragment	Yes	/	Yes	Viruses;Duplodnaviria;Heunggongvirae;Uroviricota;Caudoviricetes
IMGVR_UViG_3300028602_000001	huge_phage_5158	217234	Camargo.et.al.2023	Environmental;Aquatic;Deep subsurface	Deep subsurface	0.320884	Complete	High-quality	Yes	/	Yes	Viruses;Duplodnaviria;Heunggongvirae;Uroviricota;Caudoviricetes
IMGVR_UViG_3300031825_000002	huge_phage_5159	313916	Camargo.et.al.2023	Environmental;Terrestrial;Soil	Soil	0.413729	Low-quality	Genome-fragment	Yes	/	Yes	Viruses;Duplodnaviria;Heunggongvirae;Uroviricota;Caudoviricetes
IMGVR_UViG_3300003375_000001	huge_phage_5163	238517	Camargo.et.al.2023	Environmental;Aquatic;Freshwater	Freshwater	0.471488	Complete	High-quality	Yes	/	Yes	Viruses;Duplodnaviria;Heunggongvirae;Uroviricota;Caudoviricetes
IMGVR_UViG_3300021091_000011	huge_phage_5167	204357	Camargo.et.al.2023	Environmental;Aquatic;Freshwater	Freshwater	0.556051	Low-quality	Genome-fragment	Yes	/	Yes	Viruses;Duplodnaviria;Heunggongvirae;Uroviricota;Caudoviricetes
IMGVR_UViG_3300046507_000773	huge_phage_5172	226810	Camargo.et.al.2023	Host-associated;Plants;Roots	Plants-related	0.536414	Medium-quality	Genome-fragment	Yes	/	Yes	Viruses;Duplodnaviria;Heunggongvirae;Uroviricota;Caudoviricetes
IMGVR_UViG_3300028569_002417	huge_phage_5177	225527	Camargo.et.al.2023	Environmental;Aquatic;Freshwater	Freshwater	0.360072	Medium-quality	Genome-fragment	Yes	/	Yes	Viruses;Duplodnaviria;Heunggongvirae;Uroviricota;Caudoviricetes
IMGVR_UViG_3300049001_000044	huge_phage_5180	343229	Camargo.et.al.2023	Environmental;Terrestrial;Soil	Soil	0.50466	Complete	High-quality	Yes	/	Yes	Viruses;Duplodnaviria;Heunggongvirae;Uroviricota;Caudoviricetes
IMGVR_UViG_3300050120_000152	huge_phage_5182	340344	Camargo.et.al.2023	Environmental;Terrestrial;Soil	Soil	0.346958	High-quality	High-quality	Yes	/	Yes	Viruses;Duplodnaviria;Heunggongvirae;Uroviricota;Caudoviricetes
IMGVR_UViG_3300042988_001200	huge_phage_5185	204120	Camargo.et.al.2023	Environmental;Aquatic;Freshwater	Freshwater	0.311557	High-quality	High-quality	Yes	/	Yes	Viruses;Duplodnaviria;Heunggongvirae;Uroviricota;Caudoviricetes
IMGVR_UViG_3300046786_000293	huge_phage_5187	338510	Camargo.et.al.2023	Environmental;Aquatic;Freshwater	Freshwater	0.393303	Medium-quality	Genome-fragment	Yes	/	Yes	Viruses;Duplodnaviria;Heunggongvirae;Uroviricota;Caudoviricetes
[truncated: 7,694 more rows]

## Sheet: ST3
Supplementar Table 3 | The genomic information of Jug phages. The original and curated (final) length of HPGC genomes (105 genomes) is shown, the curated (final) length of genomes (34 genomes) outside HPGC is shown. The SRA IDs of the metagenomic reads we used for de novo assembly and/or genome curation are included.
[truncated: 141 more rows]

[truncated: 23 more sheets: ST4, ST5, ST6, ST7, ST8, ST9, ST10, ST11, ST12, ST13, ST14, ST15, ST16, ST17, ST18, ST19, ST20, ST21, ST22, ST23a …]
